# Supplementary material for: An integrative assessment of the diversity, phylogeny, distribution, and conservation of the terrestrial reptiles (Sauropsida, Squamata) of the United Arab Emirates
Source: PubMed Central journal article supplement (PMC6497385; doi:10.1371/journal.pone.0216273), 2019-05-02

## **S1 Appendix. Atlas of the terrestrial reptiles of the United Arab Emirates**

Appendix showing photographs, distribution and ecology of all the 60 species of terrestrial reptiles of the United Arab Emirates included in the present study and the species' potential distribution inferred with species distribution models (SDMs).

**A HIGH-RESOLUTION VERSION OF THIS APPENDIX CAN BE  
DOWNLOADED FROM THE FOLLOWING WEB ADDRESS**

<http://purl.org/carranza/data>

# Supplementary information

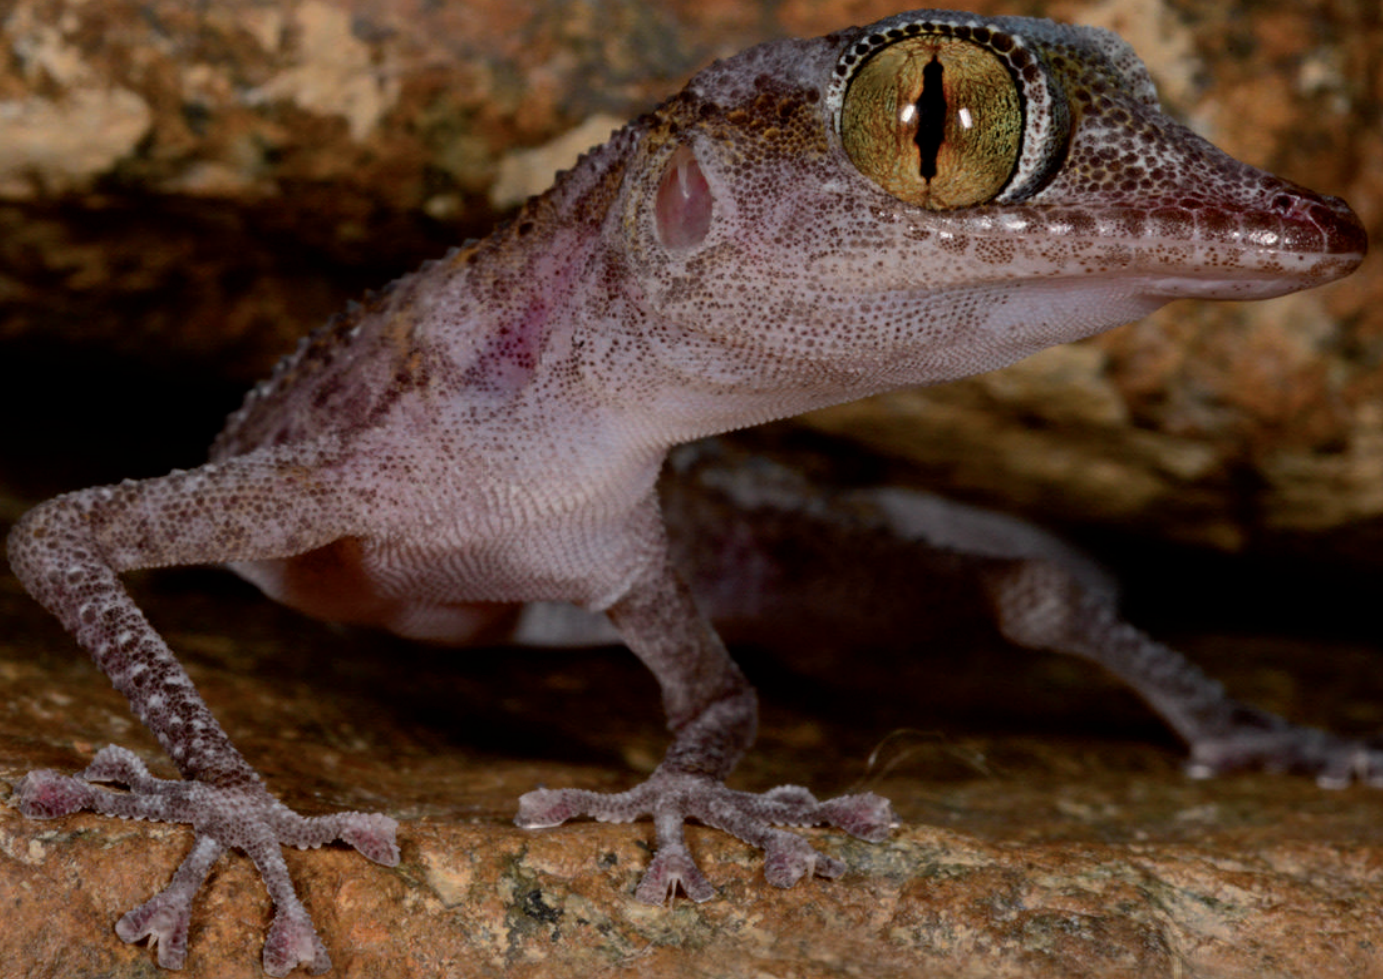



## INDEX

|                                                                        |    |
|------------------------------------------------------------------------|----|
| <b>S1 APPENDIX: ATLAS OF THE TERRESTRIAL REPTILES OF THE UAE</b> ..... | 7  |
| <b>S1-S60: SPECIES INFORMATION</b> .....                               | 8  |
| <b>LIZARDS</b> .....                                                   | 9  |
| <b>AGAMIDS</b> .....                                                   | 9  |
| Agamidae .....                                                         | 9  |
| <i>Phrynocephalus arabicus</i> .....                                   | 9  |
| <i>Phrynocephalus maculatus</i> .....                                  | 10 |
| <i>Pseudotrapelus jensvindumi</i> .....                                | 11 |
| <i>Trapelus flavimaculatus</i> .....                                   | 12 |
| <i>Uromastyx aegyptia leptieni</i> .....                               | 13 |
| <i>Uromastyx aegyptia microlepis</i> .....                             | 14 |
| <b>GECKOS</b> .....                                                    | 15 |
| Gekkonidae .....                                                       | 15 |
| <i>Bunopus tuberculatus</i> .....                                      | 15 |
| <i>Cyrtopodion scabrum</i> .....                                       | 16 |
| <i>Hemidactylus flaviviridis</i> .....                                 | 17 |
| <i>Hemidactylus persicus</i> .....                                     | 18 |
| <i>Hemidactylus robustus</i> .....                                     | 19 |
| <i>Pseudoceramodactylus khobarensis</i> .....                          | 20 |
| <i>Stenodactylus arabicus</i> .....                                    | 21 |
| <i>Stenodactylus doriae</i> .....                                      | 22 |
| <i>Stenodactylus leptocosymbotes</i> .....                             | 23 |
| <i>Stenodactylus slevini</i> .....                                     | 24 |
| <i>Trachydactylus hajarensis</i> .....                                 | 25 |
| Phyllodactylidae .....                                                 | 26 |
| <i>Asaccus caudivolvulus</i> .....                                     | 26 |
| <i>Asaccus gallagheri</i> .....                                        | 27 |
| <i>Asaccus gardneri</i> .....                                          | 28 |
| <i>Asaccus margaritae</i> .....                                        | 29 |
| <i>Ptyodactylus orlovi</i> .....                                       | 30 |
| <i>Ptyodactylus ruusaljibalicus</i> .....                              | 31 |
| Sphaerodactylidae .....                                                | 32 |
| <i>Pristurus carteri</i> .....                                         | 33 |
| <i>Pristurus celerrimus</i> .....                                      | 33 |
| <i>Pristurus minimus</i> .....                                         | 34 |
| <i>Pristurus rupestris</i> -sp.3 .....                                 | 35 |
| <i>Teratoscincus keyserlingii</i> .....                                | 36 |
| <b>LACERTIDS</b> .....                                                 | 37 |
| Lacertidae .....                                                       | 37 |
| <i>Acanthodactylus blanfordii</i> .....                                | 37 |
| <i>Acanthodactylus boskianus asper</i> .....                           | 38 |
| <i>Acanthodactylus gongrorhynchatus</i> .....                          | 39 |
| <i>Acanthodactylus haasi</i> .....                                     | 40 |
| <i>Acanthodactylus opheodurus</i> .....                                | 41 |
| <i>Acanthodactylus schmidtii</i> .....                                 | 42 |
| <i>Mesalina adramitana</i> .....                                       | 43 |
| <i>Mesalina brevirostris</i> .....                                     | 44 |
| <i>Omanosaura cyanura</i> .....                                        | 45 |
| <i>Omanosaura jayakari</i> .....                                       | 46 |

|                                                   |    |
|---------------------------------------------------|----|
| <b>SKINKS</b> .....                               | 47 |
| Scincidae.....                                    | 47 |
| <i>Ablepharus pannonicus</i> .....                | 47 |
| <i>Chalcides ocellatus ocellatus</i> .....        | 48 |
| <i>Heremites septemtaeniatus</i> .....            | 49 |
| <i>Scincus mitranus</i> .....                     | 50 |
| <i>Scincus scincus conirostris</i> .....          | 51 |
| <i>Trachylepis tessellata</i> .....               | 52 |
| <b>AMPHISBAENIDS</b> .....                        | 53 |
| Trogonophidae .....                               | 53 |
| <i>Diplometopon zarudnyi</i> .....                | 53 |
| <b>VARANIDS</b> .....                             | 54 |
| Varanidae .....                                   | 54 |
| <i>Varanus griseus griseus</i> .....              | 54 |
| <b>SNAKES</b> .....                               | 55 |
| Boidae .....                                      | 55 |
| <i>Eryx jayakari</i> .....                        | 55 |
| Colubridae .....                                  | 56 |
| <i>Lytorhynchus diadema diadema</i> .....         | 56 |
| <i>Platyceps rhodorachis rhodorachis</i> .....    | 57 |
| <i>Platiceps ventromaculatus</i> .....            | 58 |
| <i>Spalerosophis diadema cliffordii</i> .....     | 59 |
| <i>Telescopus dhara dhara</i> .....               | 60 |
| Lamprophiidae.....                                | 61 |
| <i>Psammophis schokari</i> .....                  | 61 |
| <i>Rhagerhis moilensis</i> .....                  | 62 |
| Leptotyphlopidae .....                            | 63 |
| <i>Myriopholis macrorhyncha</i> .....             | 63 |
| Typhlopidae .....                                 | 64 |
| <i>Indotyphlops braminus</i> .....                | 64 |
| Viperidae .....                                   | 65 |
| <i>Cerastes gasperettii gasperettii</i> .....     | 65 |
| <i>Echis carinatus sochureki</i> .....            | 66 |
| <i>Echis omanensis</i> .....                      | 67 |
| <i>Pseudocerastes persicus</i> .....              | 68 |
| <b>S61-S80: SPECIES DISTRIBUTION MODELS</b> ..... | 69 |

## AUTHORS OF THE PHOTOGRAPHS

Authors list of photograph with the appendix code for each photo, and specie's photos between contents.

**Amat, Fèlix (6):** S3, S19, S20 and S23.

**Carranza, Salvador (20):** S10, S14, S16, S17, S21, S25, S26, S27, S55, S57, S58, S59 and S60.

**Donaire, David (1):** S39.

**Els, Johannes (8):** S1, S5, S7, S11, S13, S15, S18, S22, S28, S34, S38, S42, S43, S45, S46, S47, S49, S50, S51, S53 and S54.

**Fernández, Daniel (6):** S9, S29, S33 and S35.

**Gardner, Andrew (3):** S8, S24, S32 and S36.

**Gebhart, Jürgen (2):** S40 and S44.

**Mozaffari, Omid (1):** S41.

**Sindaco, Roberto (6):** S2, S12, S37 and S52.

**Šmíd, Jiří (3):** S4 and S6.

**Van An del, Priscilla (1):** S31.

**Supplementary information cover page:** *Asaccus caudivolvulus* (Els, Johannes)

**Pg 7:** *Pseudocerastes persicus* (Els, Johannes)



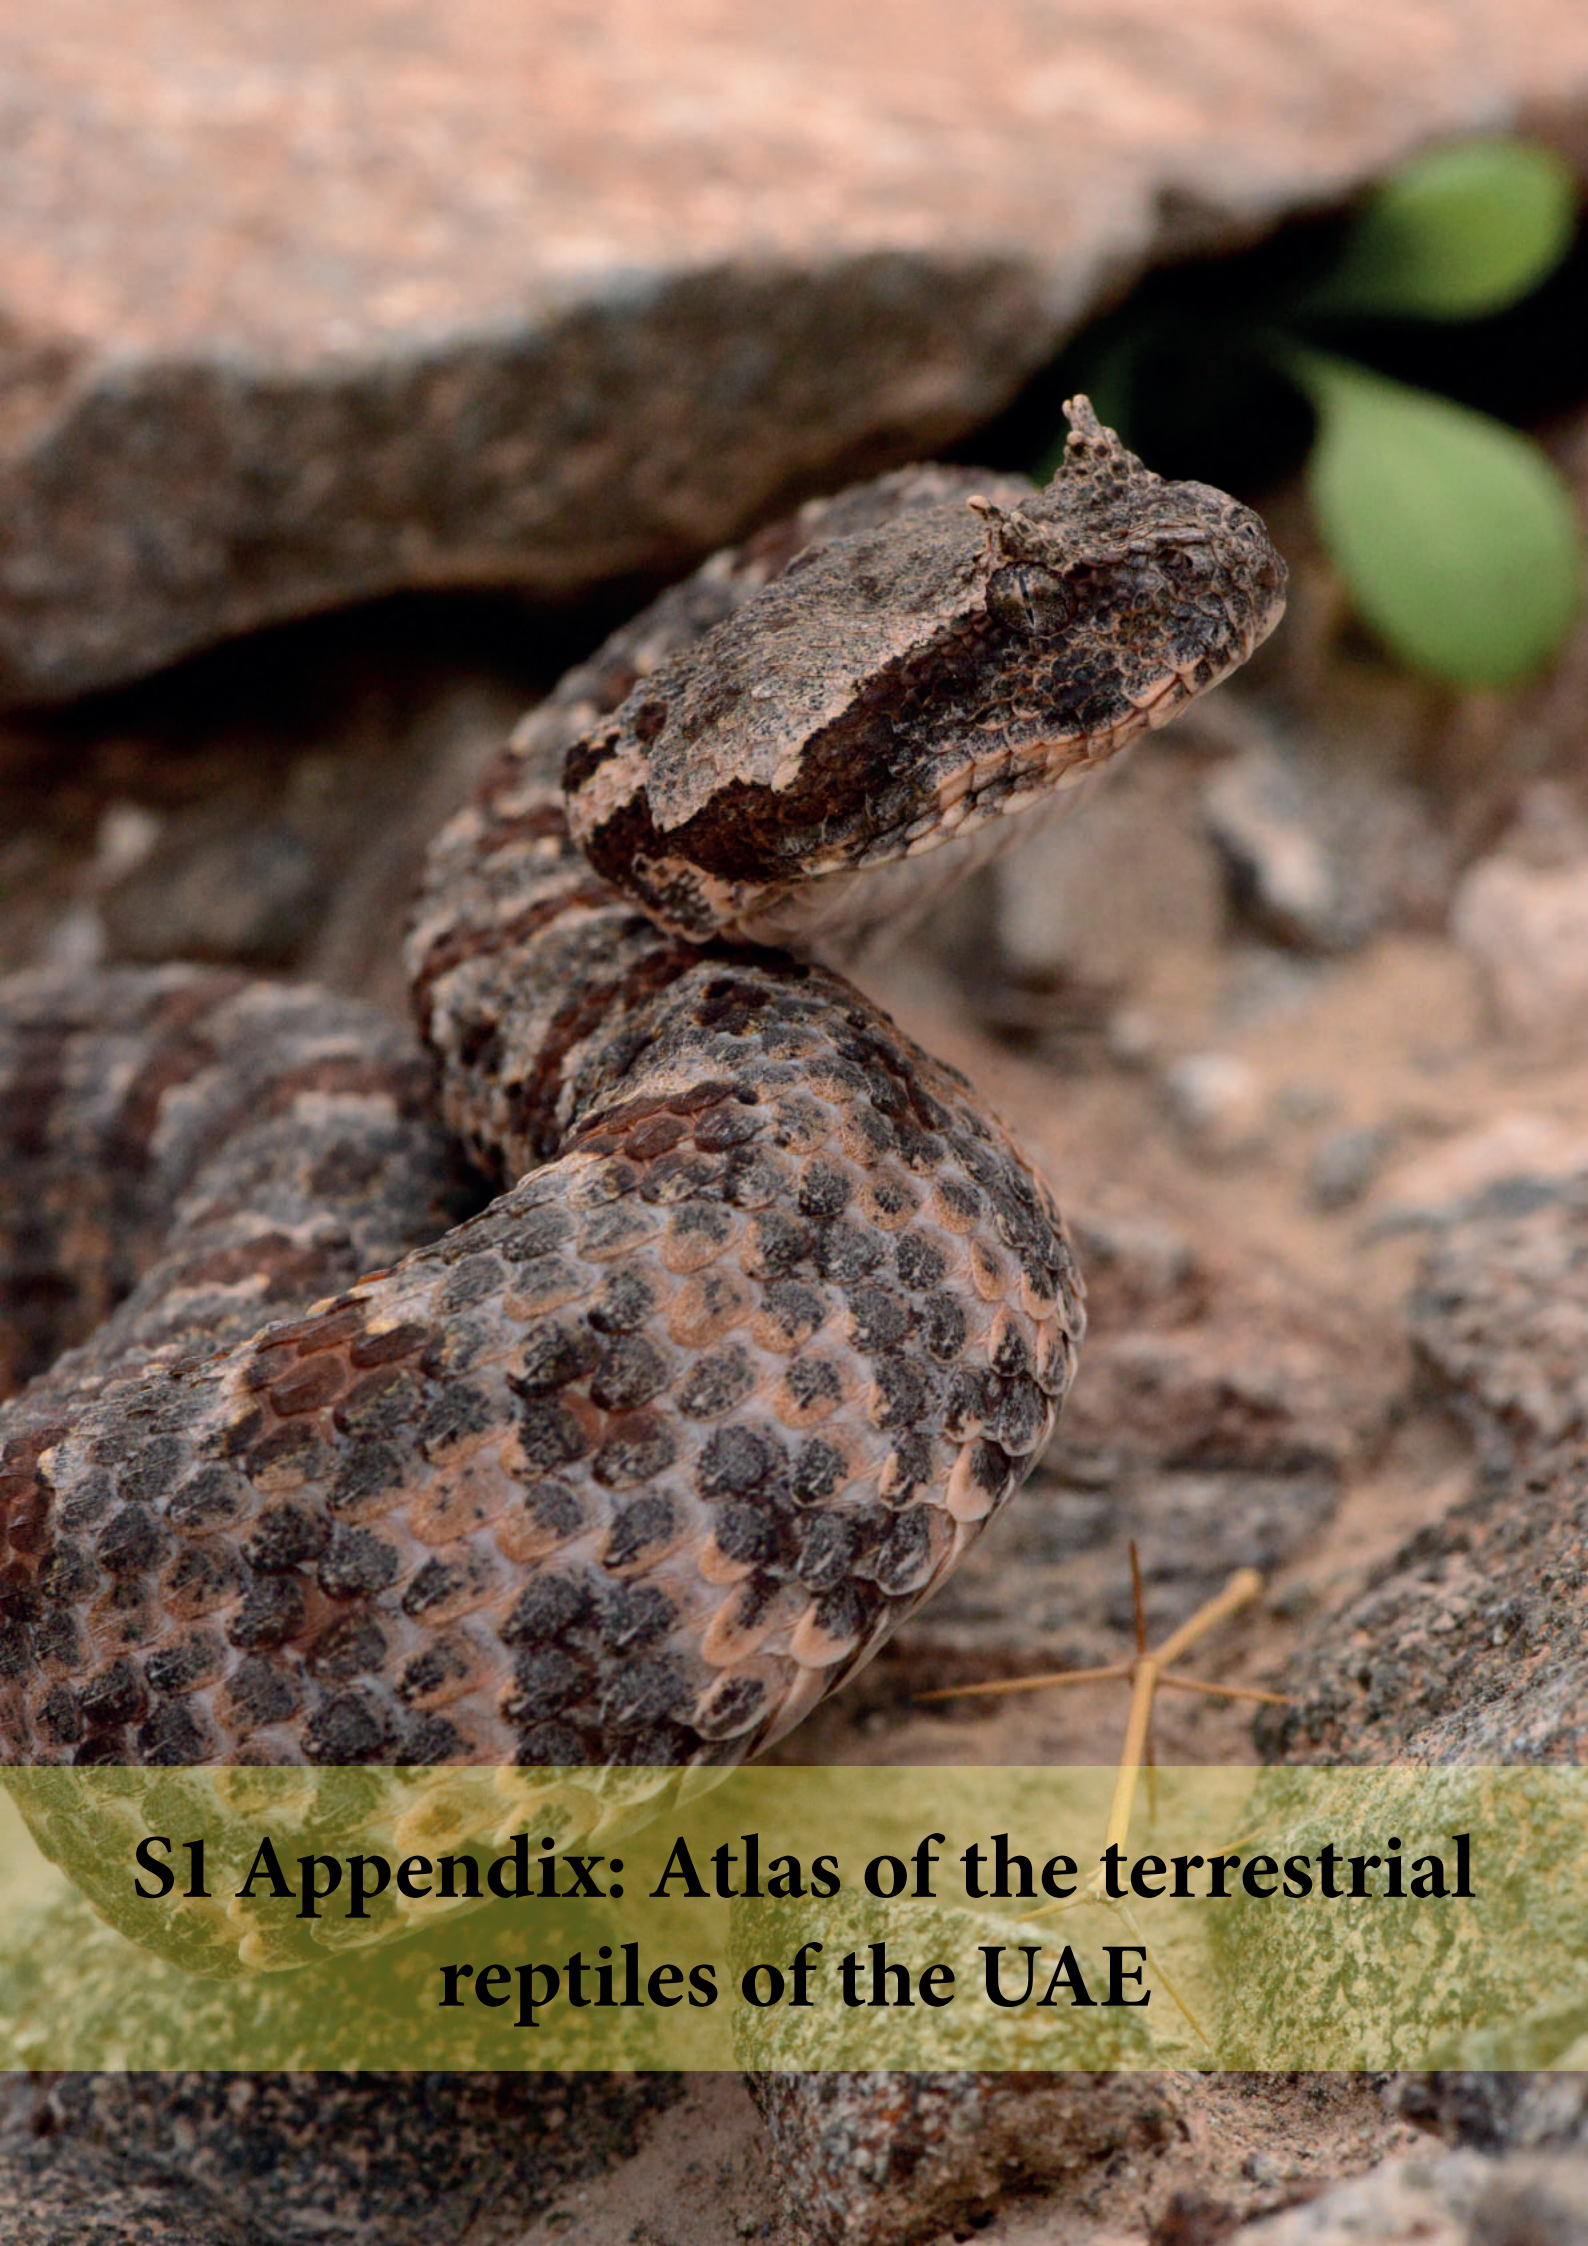

**S1 Appendix: Atlas of the terrestrial  
reptiles of the UAE**



### S1- S60: Species information

There is a separate plate for each of the 60 species of terrestrial reptiles of the UAE. Each plate contains the species name, the authority (except undescribed species) and the following items:

- A) Distribution map with observations (red dots) at a scale of 10 arc-minutes (~18 km).
- B) Table containing the IUCN global/regional conservation category and explaining if the species is venomous, endemic or native of the UAE country. A species is considered introduced if the introduction happened after 1,500 AD.
- C) Histogram of the elevation frequency of the species with 100 m intervals.
- D) Picture of the species
- E) Two-dimensional climatic space of UAE (grey dots) characterized by total annual precipitation (BIO12) and mean annual temperature (BIO1). Red dots represent species distribution.
- F) Boxplot of Land Cover distances. TO (Tree Open); C (Cropland); COVM (Cropland/Other Vegetation Mosaic); S (Shrub); H (Herbaceous); SV(Sparse Vegetation); BAGR (Bare Areas Gravel Rock); BAS (Bare Areas Sand); U (Urban). The top of the rectangle indicates the third quartile, a horizontal line near the middle of the rectangle indicates median, and the bottom of the rectangle indicates the first quartile. The vertical line extending from top of the rectangle indicates the maximum value, and another vertical line extending from the bottom of the rectangle indicates the minimum value. Empty circles represent outliers.

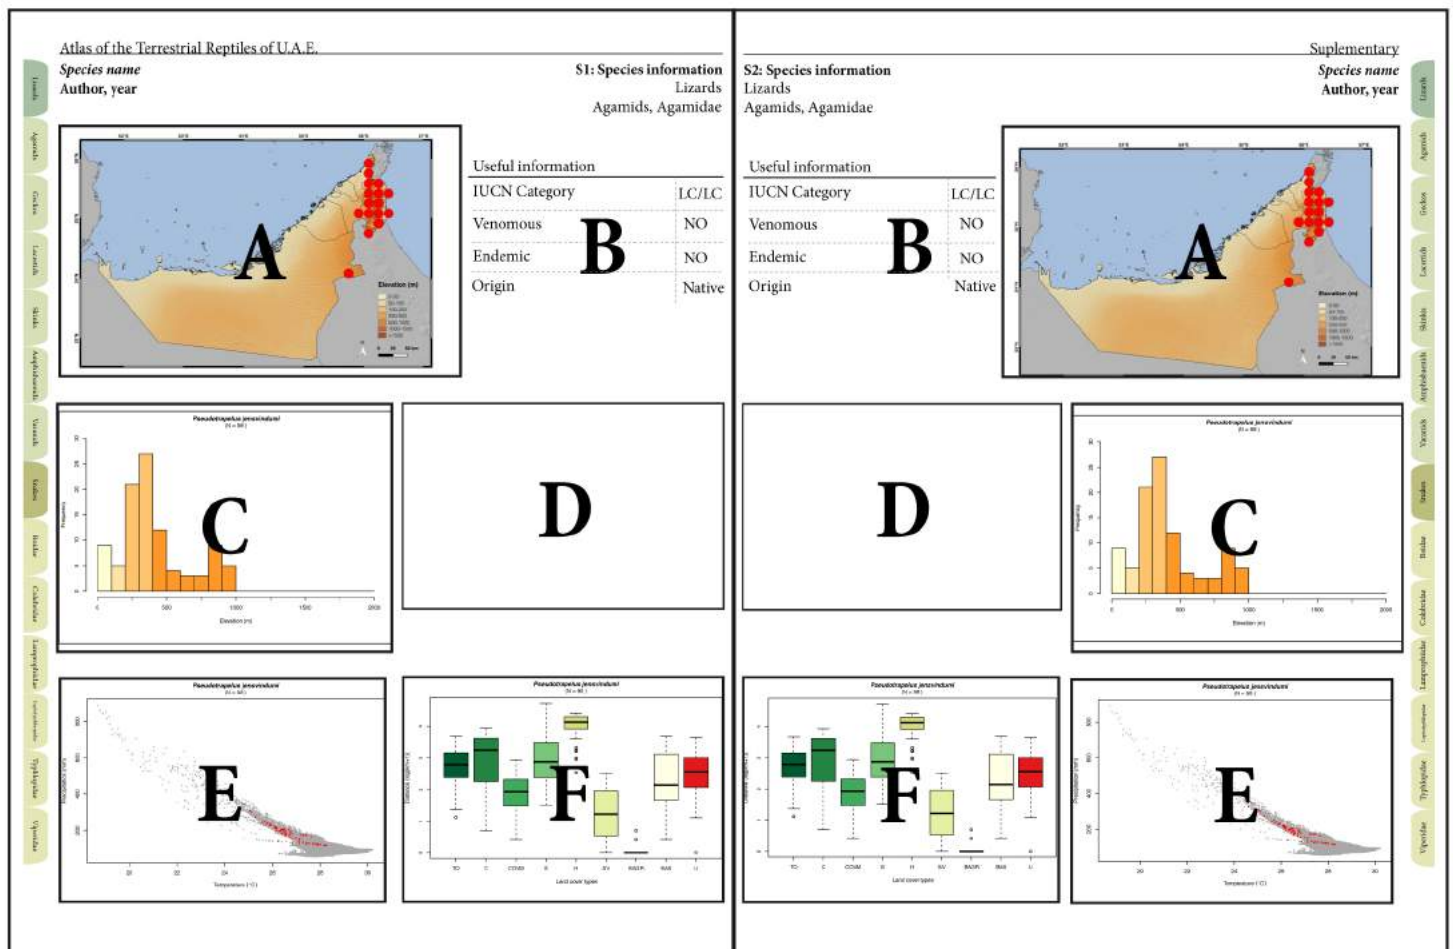

**S1: Species information**

Lizards  
Agamids, Agamidae

*Phrynocephalus arabicus*  
Anderson, 1894

B

Useful information

|               |        |
|---------------|--------|
| IUCN Category | LC/LC  |
| Venomous      | NO     |
| Endemic       | NO     |
| Origin        | Native |

A

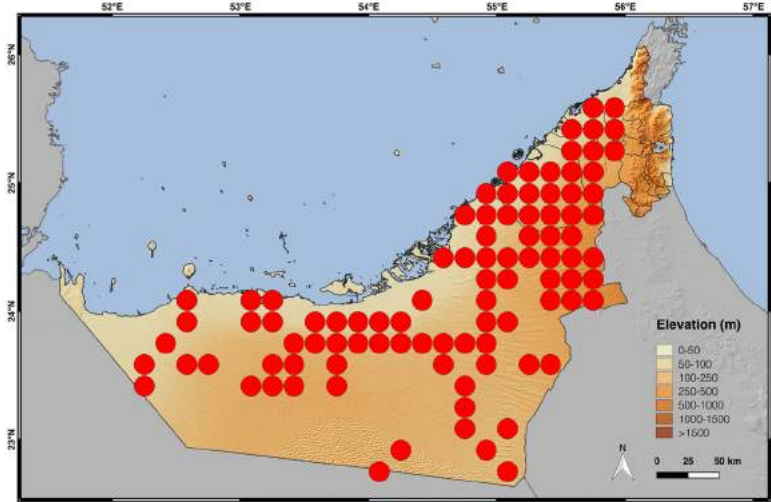

D

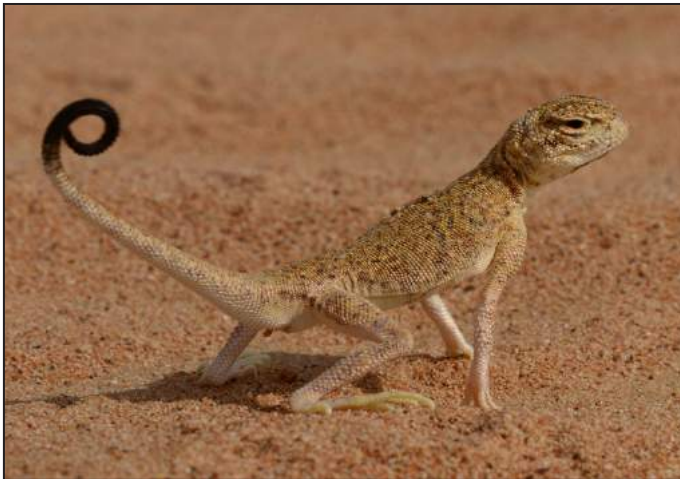

C

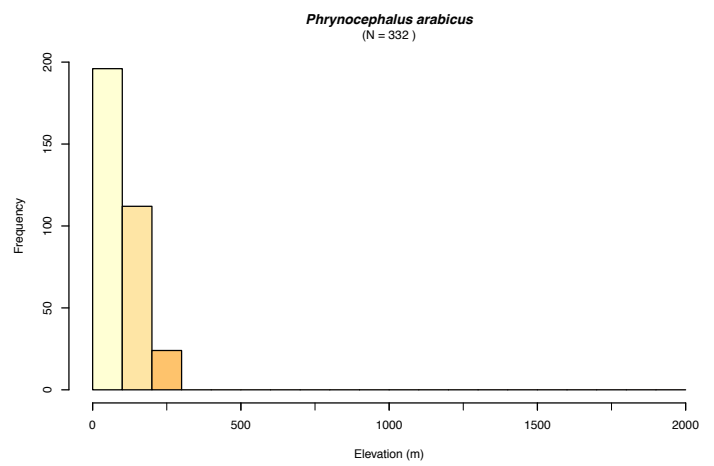

F

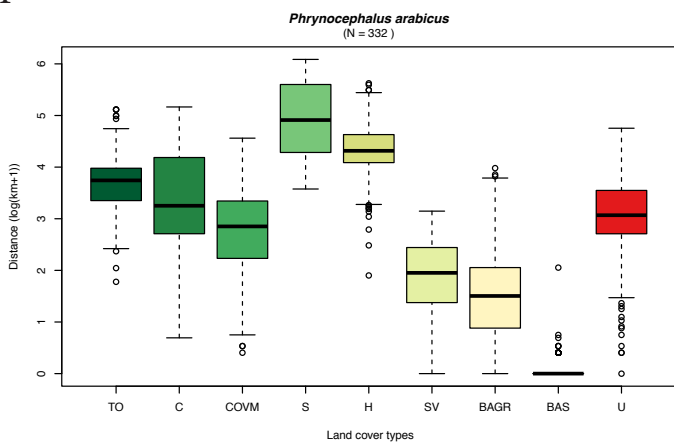

E

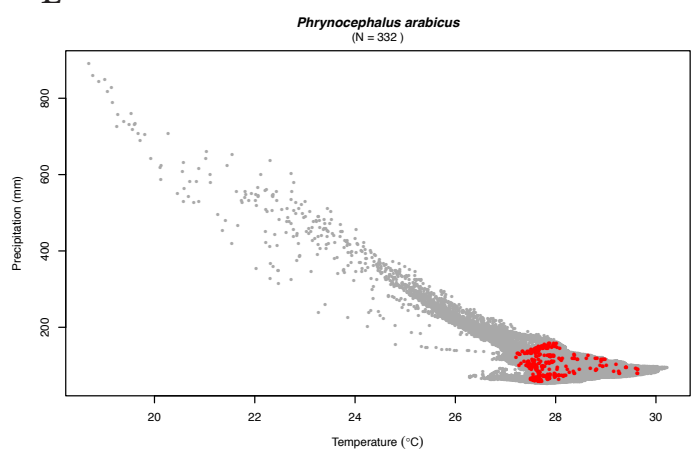

Lizards

Agamids

Geckos

Lacertids

Skinks

Amphisbaenids

Varanids

Snakes

Boidae

Colubridae

Lamprophiidae

Leptotyphlopidae

Typhlopidae

Viperidae

***Phrynocephalus maculatus***  
Anderson, 1872

**S2: Species information**  
Lizards  
Agamids, Agamidae

- Lizards
- Agamids
- Gekkos
- Lacertids
- Skinks
- Ampeliscaenids
- Varamids
- Snakes
- Boidae
- Colubridae
- Lamprophiidae
- Leptotyphlopidae
- Typhlopidae
- Viperidae

A

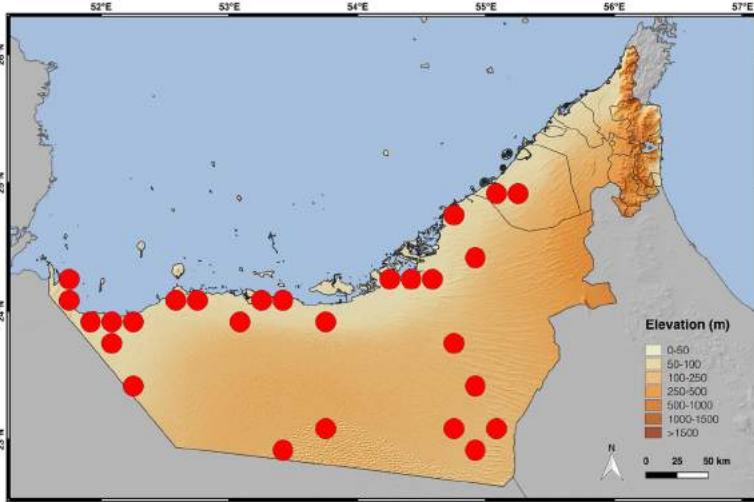

B

Useful information

|               |        |
|---------------|--------|
| IUCN Category | LC/LC  |
| Venomous      | NO     |
| Endemic       | NO     |
| Origin        | Native |

C

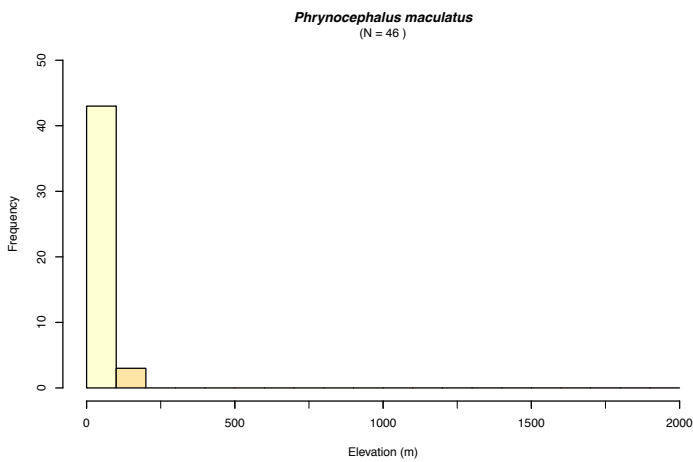

D

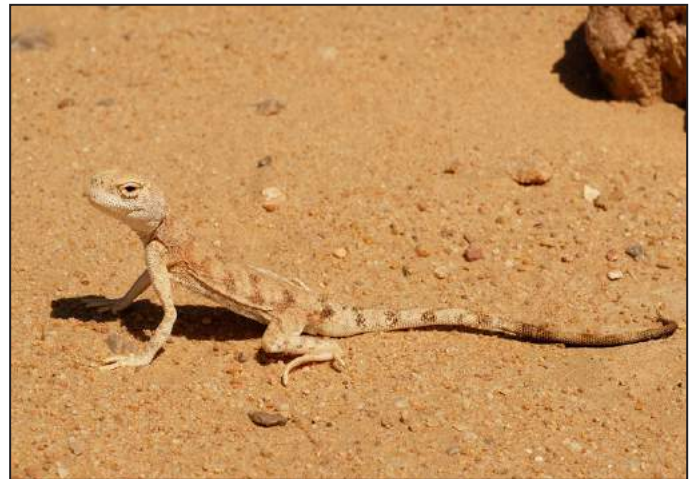

E

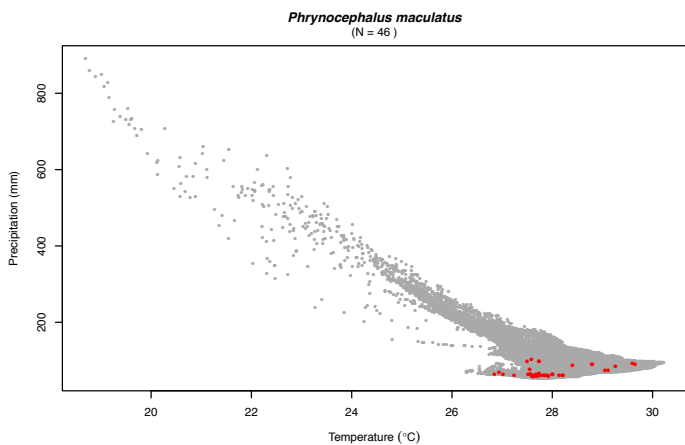

F

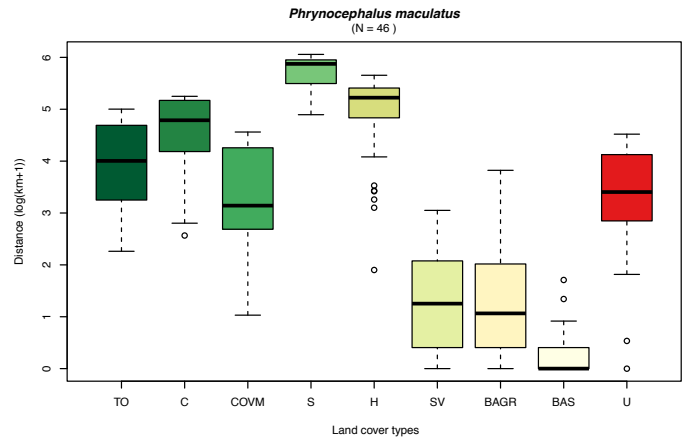

**S3: Species information**

Lizards  
Agamids, Agamidae

*Pseudotrapelus jensvindumi*  
Melnikov, Ananjeva & Papenfuss, 2013

B

Useful information

|               |        |
|---------------|--------|
| IUCN Category | LC/LC  |
| Venomous      | NO     |
| Endemic       | NO     |
| Origin        | Native |

A

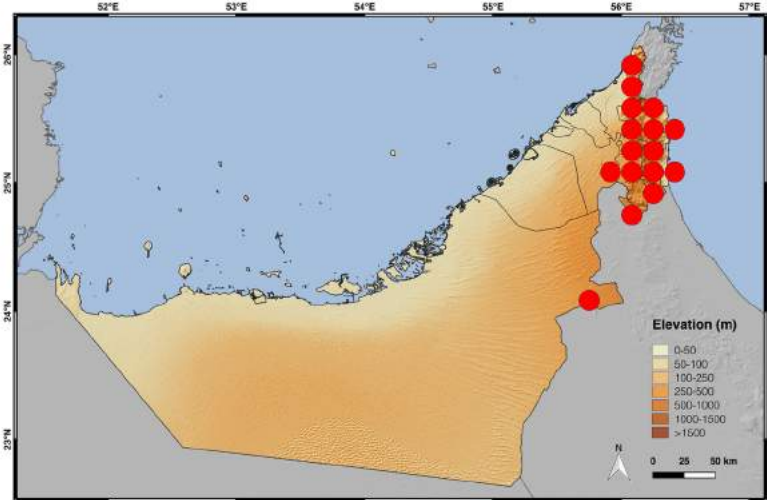

D

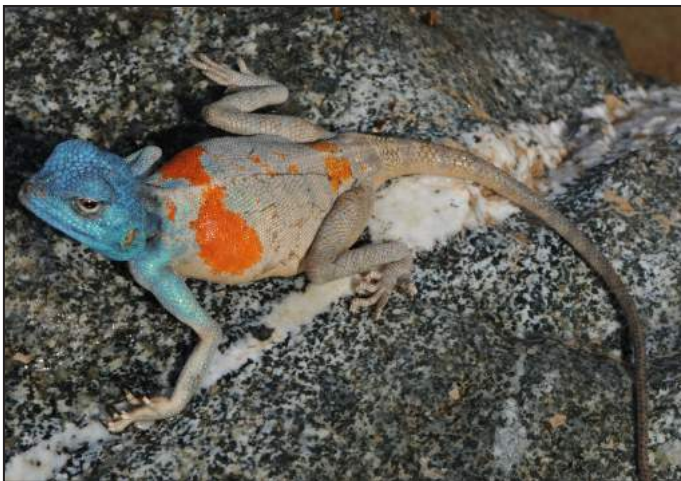

C

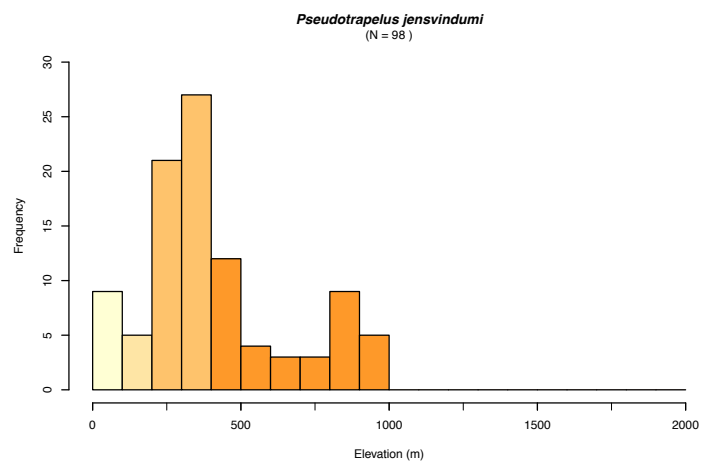

F

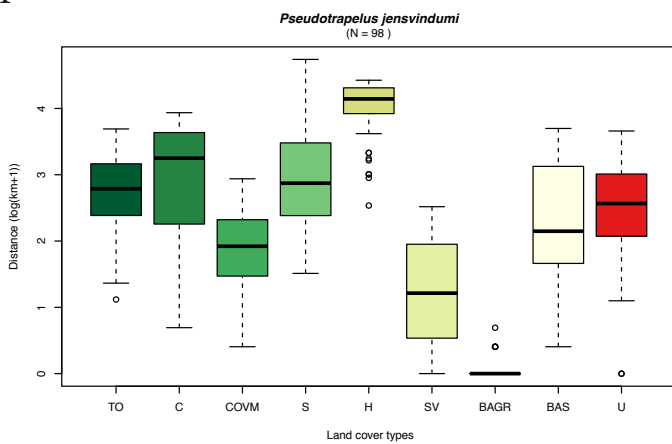

E

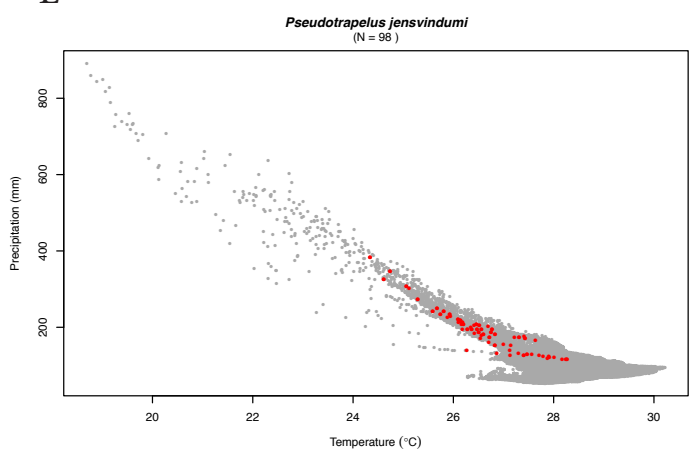

Lizards

Agamids

Geckos

Lacertids

Skinks

Amphisbaenids

Varanids

Snakes

Boidae

Colubridae

Lamprophiidae

Leptotyphlopidae

Typhlopidae

Viperidae

***Trapelus flavimaculatus***  
**Rüppell, 1835**

**S4: Species information**  
 Lizards  
 Agamids, Agamidae

- Lizards
- Agamids
- Gekkos
- Lacertids
- Skinks
- Ampeliscaenids
- Varamids
- Snakes
- Boidae
- Colubridae
- Lamprophiidae
- Leptotyphlopidae
- Typhlopidae
- Viperidae

A

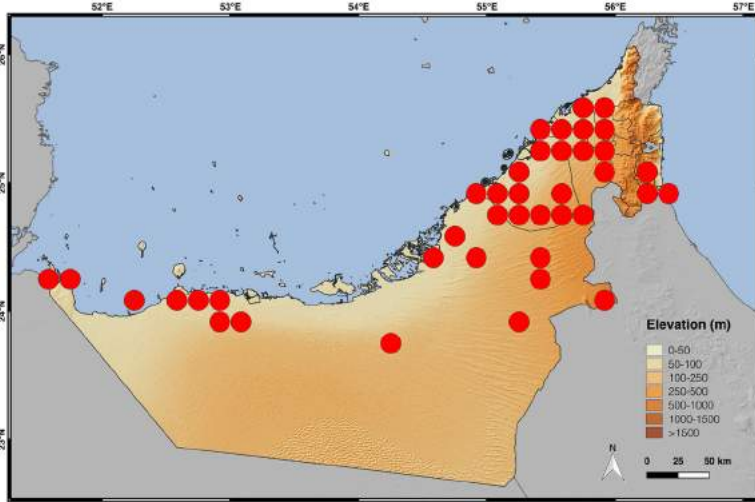

B

Useful information

|               |        |
|---------------|--------|
| IUCN Category | LC/LC  |
| Venomous      | NO     |
| Endemic       | NO     |
| Origin        | Native |

C

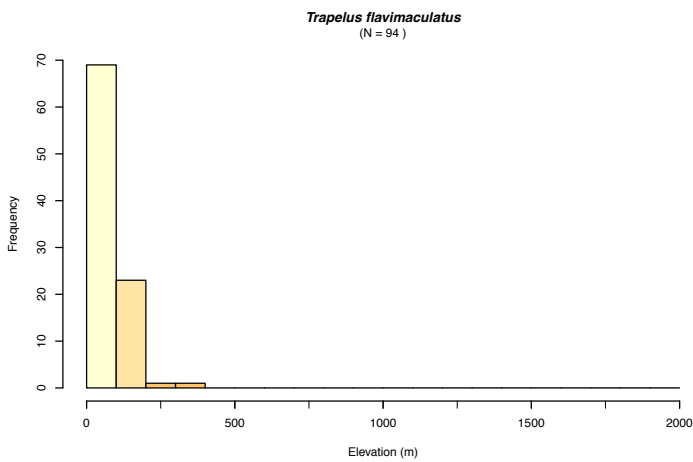

D

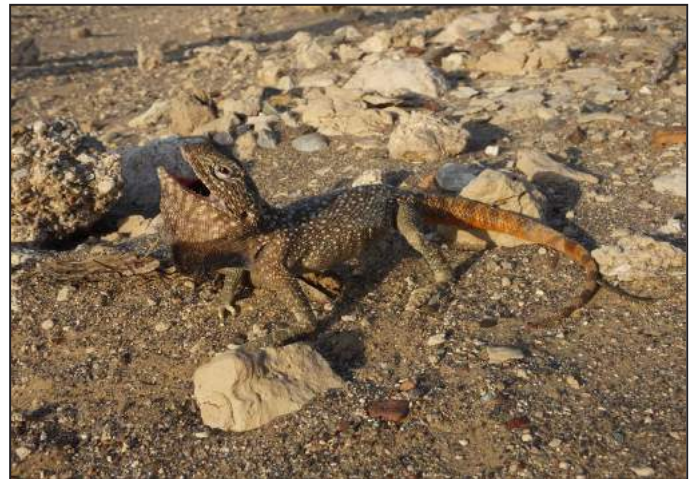

E

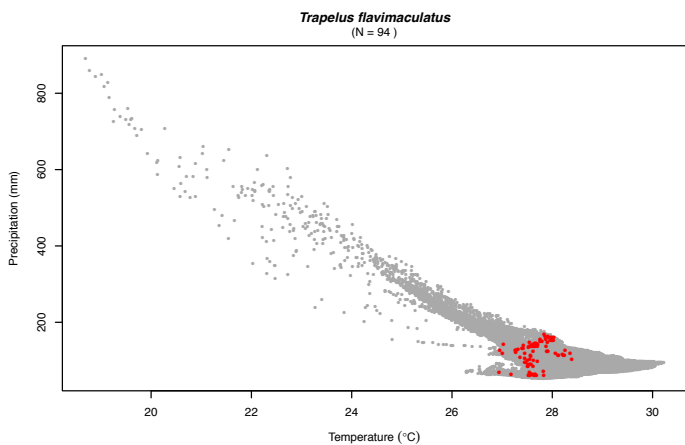

F

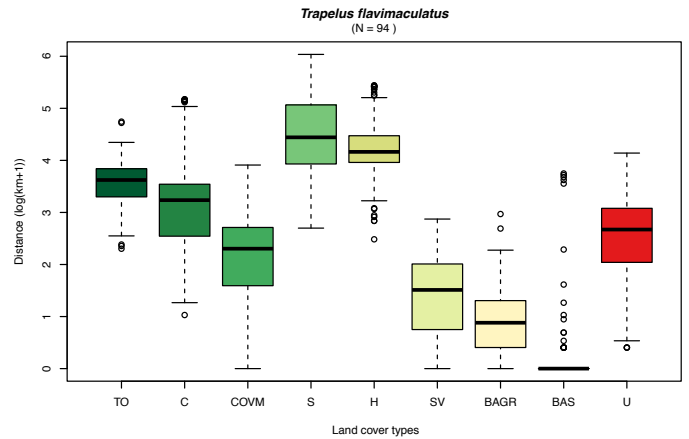

**S5: Species information**

Lizards  
Agamids, Agamidae

*Uromastyx aegyptia leptieni*  
Whilms and Böhme, 2000

B

Useful information

|               |        |
|---------------|--------|
| IUCN Category | VU/VU  |
| Venomous      | NO     |
| Endemic       | NO     |
| Origin        | Native |

A

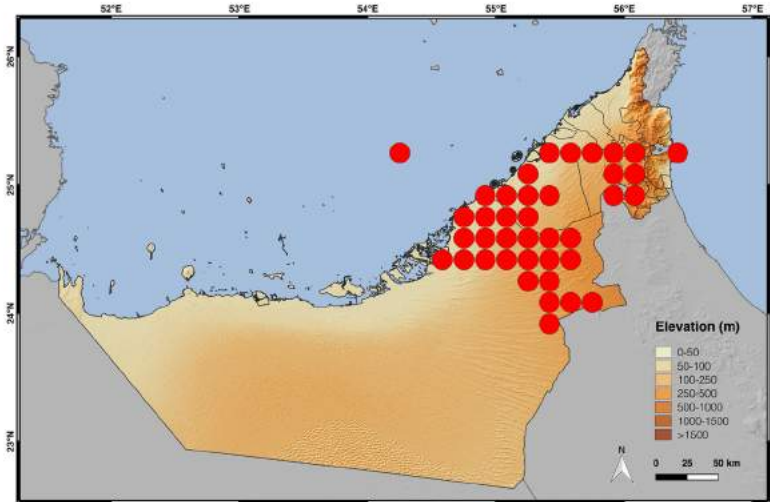

D

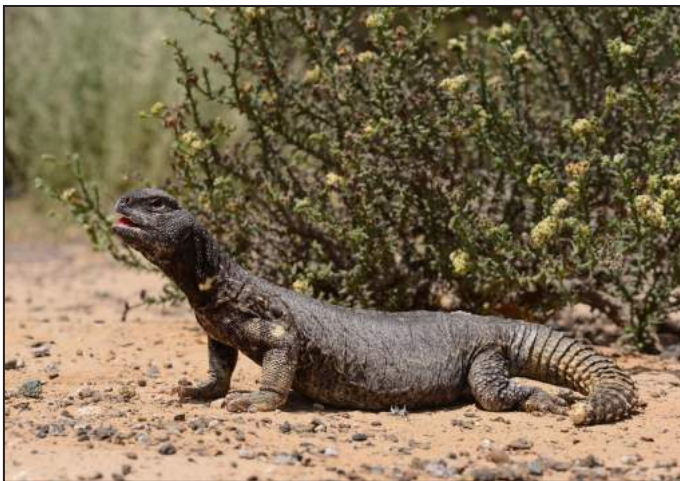

C

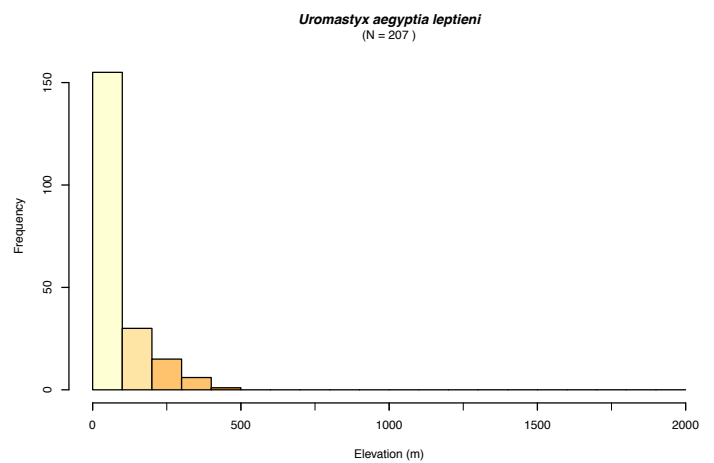

F

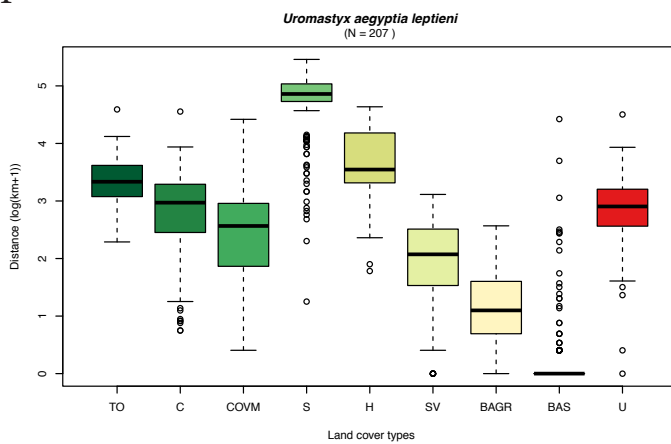

E

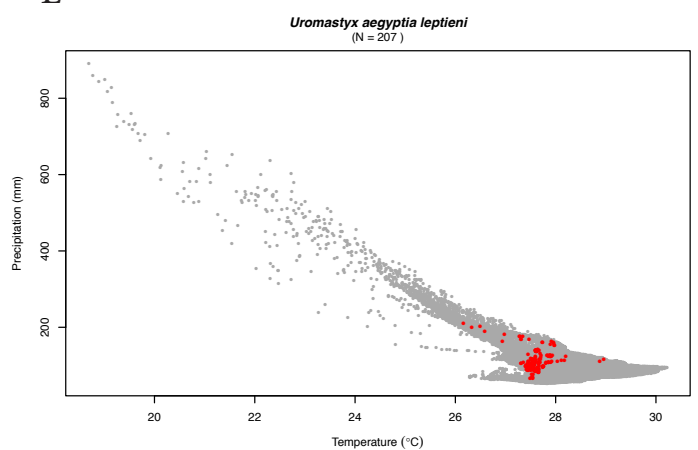

Lizards

Agamids

Geckos

Lacertids

Skinks

Amphisbaenids

Varanids

Snakes

Boidae

Colubridae

Lamproliidae

Leptotyphlopidae

Typhlopidae

Viperidae

***Uromastix aegyptia microlepis***  
**Arnold, 1980**

**S6: Species information**  
 Lizards  
 Agamids, Agamidae

- Lizards
- Agamids
- Gekkos
- Lacertids
- Skinks
- Amphisbaenids
- Varamids
- Snakes
- Boidae
- Colubridae
- Lamprophiidae
- Leptotyphlopidae
- Typhlopidae
- Viperidae

A

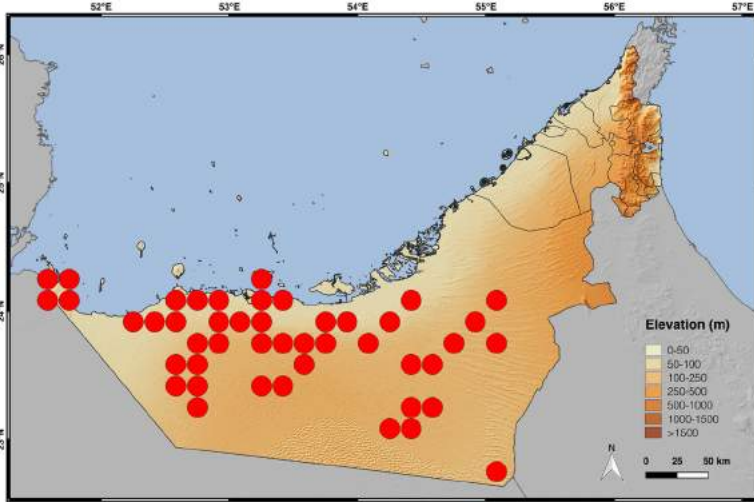

B

Useful information

|               |        |
|---------------|--------|
| IUCN Category | VU/VU  |
| Venomous      | NO     |
| Endemic       | NO     |
| Origin        | Native |

C

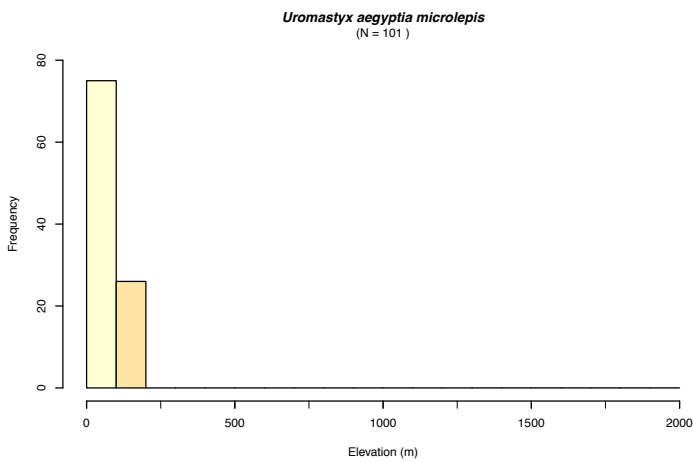

D

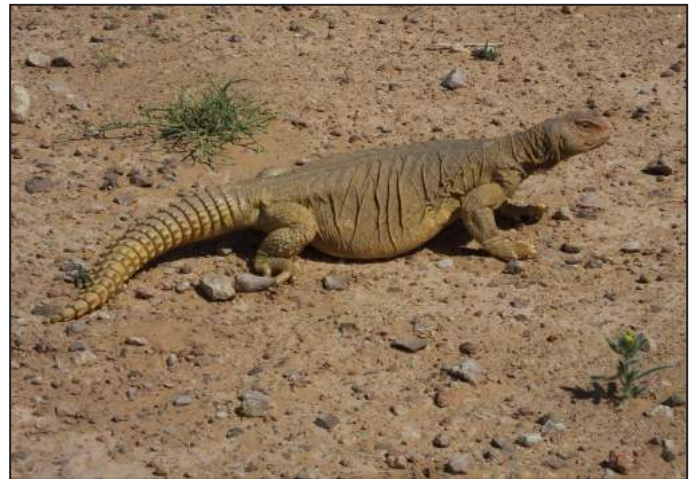

E

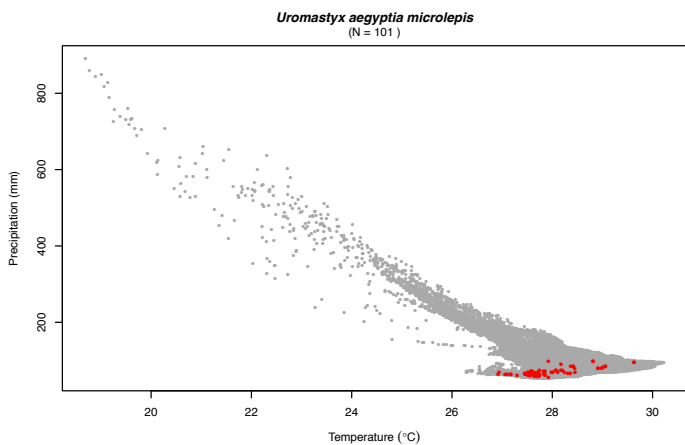

F

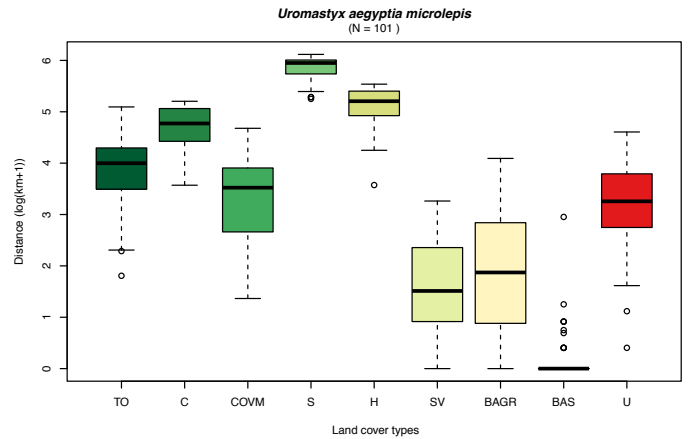

**S7: Species information**

Lizards  
Geckos, Gekkonidae

*Bunopus tuberculatus*  
Blanford, 1874

B

Useful information

|               |        |
|---------------|--------|
| IUCN Category | LC/LC  |
| Venomous      | NO     |
| Endemic       | NO     |
| Origin        | Native |

A

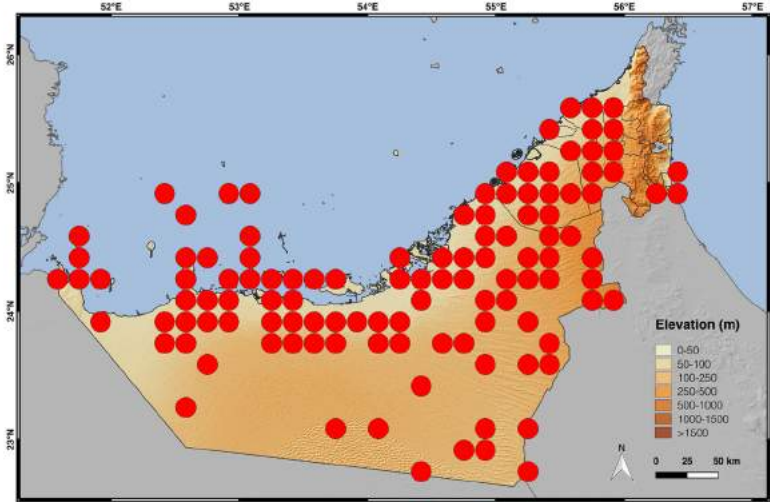

D

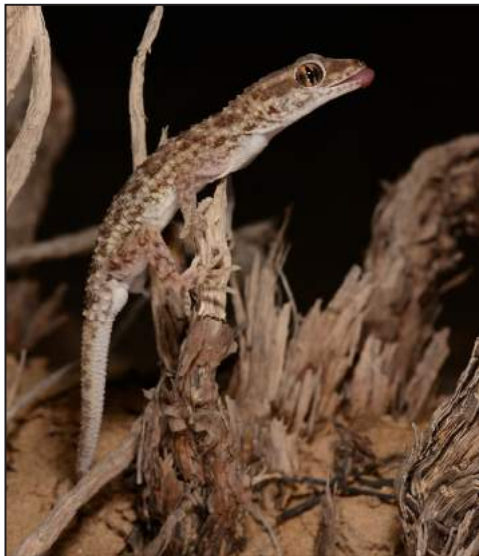

C

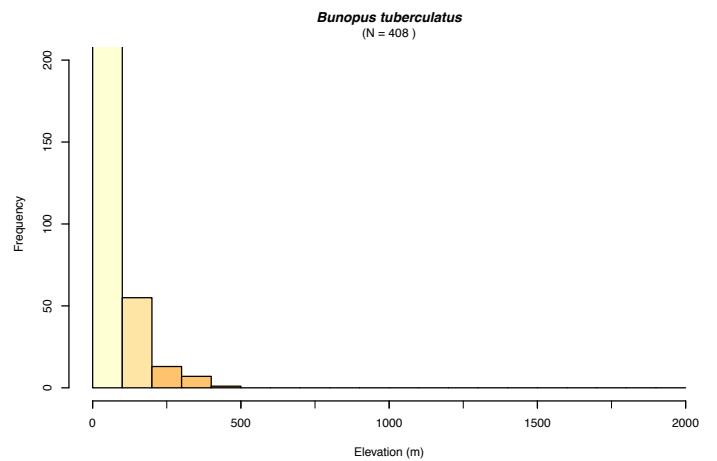

F

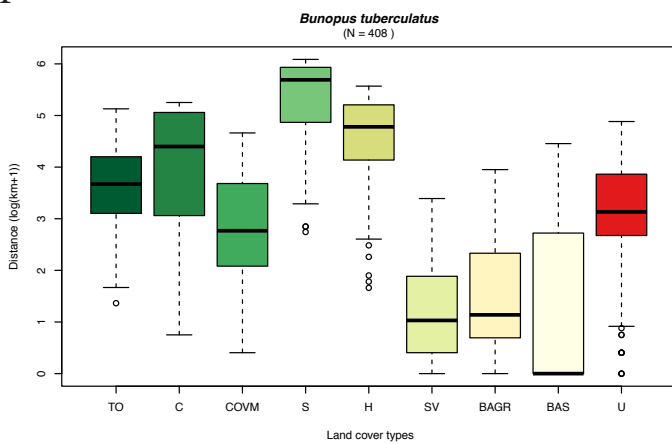

E

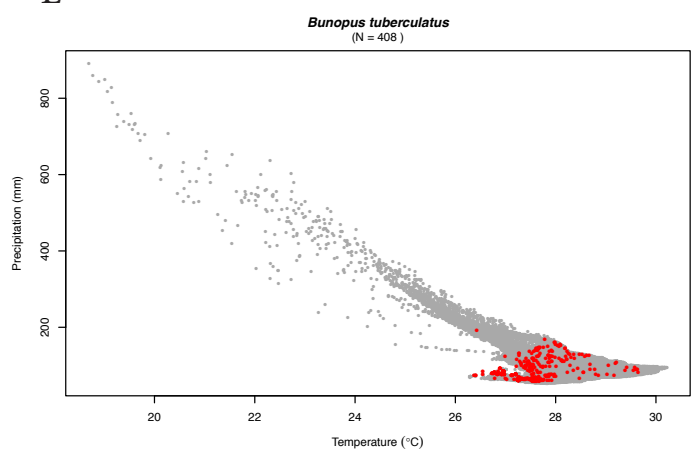

Lizards

Agamids

Geckos

Lacertids

Skinkis

Amphisbaenids

Varanids

Snakes

Boidae

Colubridae

Lamprophiidae

Leptotyphlopidae

Typhlopidae

Viperidae



***Cyrtopodion scabrum***  
(Heyden, 1827)

**S8: Species information**  
Lizards  
Geckos, Gekkonidae

- Lizards
- Agamids
- Geckos
- Lacertids
- Skinks
- Amphisbaenids
- Varamids
- Snakes
- Boidae
- Colubridae
- Lamprophiidae
- Leptotyphlopidae
- Typhlopidae
- Viperidae

A

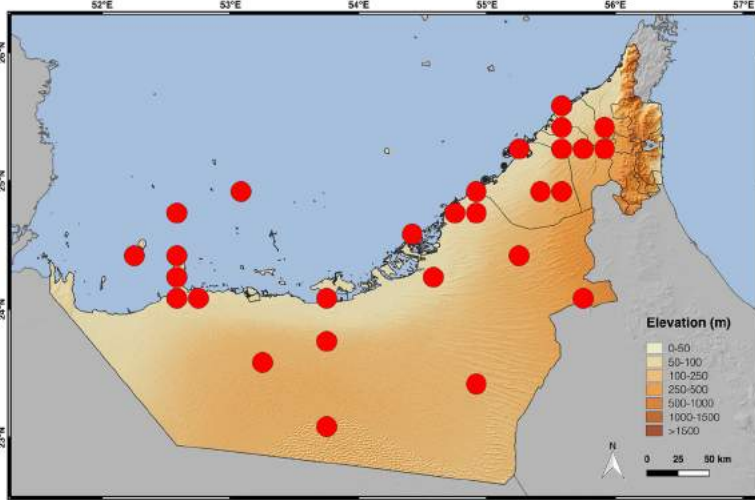

B

Useful information

|               |        |
|---------------|--------|
| IUCN Category | LC/LC  |
| Venomous      | NO     |
| Endemic       | NO     |
| Origin        | Native |

C

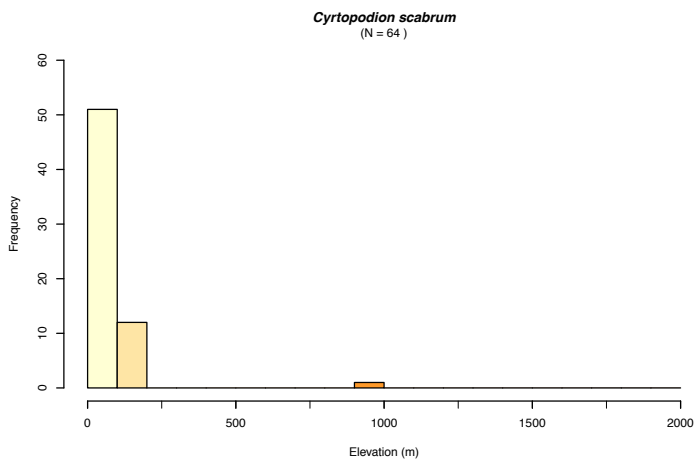

D

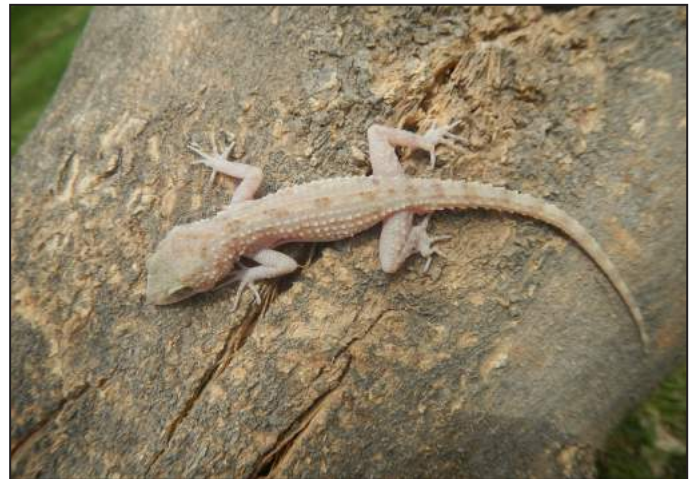

E

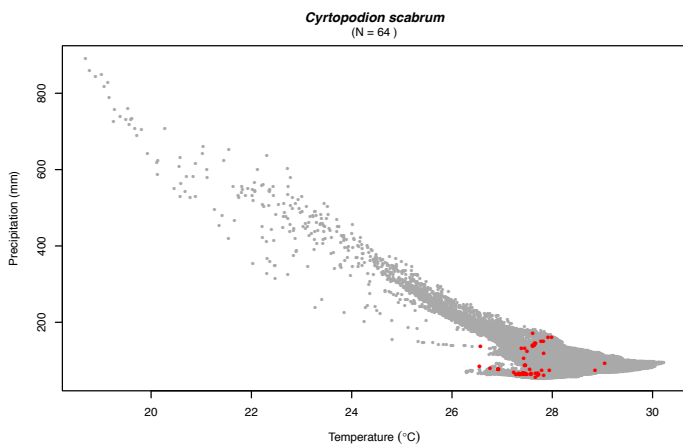

F

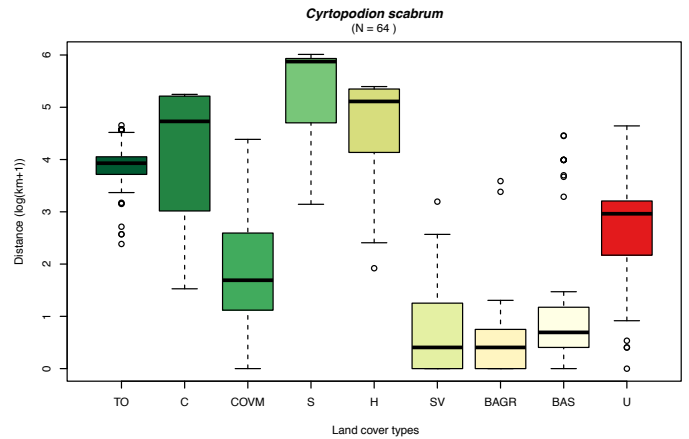

**S9: Species information**

Lizards  
Geckos, Gekkonidae

*Hemidactylus flaviviridis*  
Rüppell, 1835

B

Useful information

|               |            |
|---------------|------------|
| IUCN Category | LC/NA      |
| Venomous      | NO         |
| Endemic       | NO         |
| Origin        | Introduced |

A

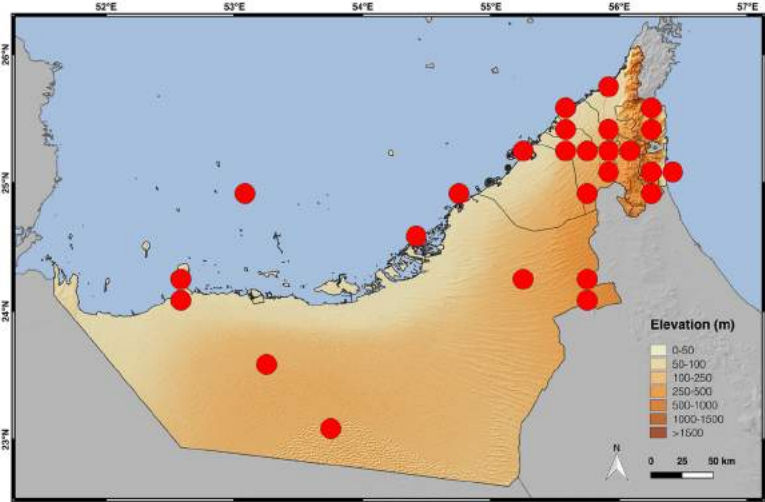

D

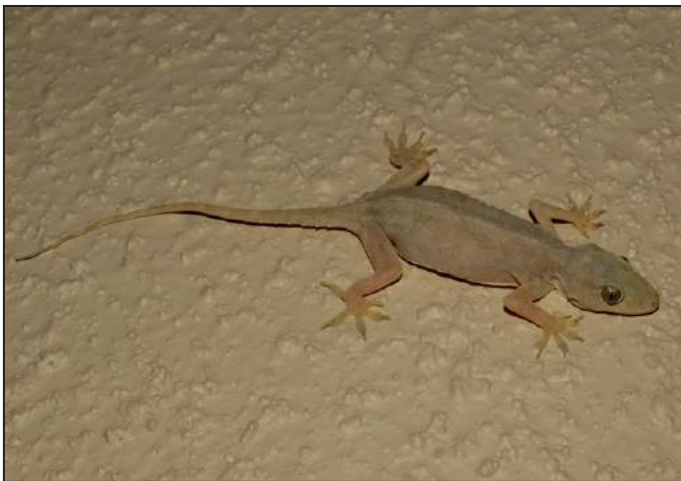

C

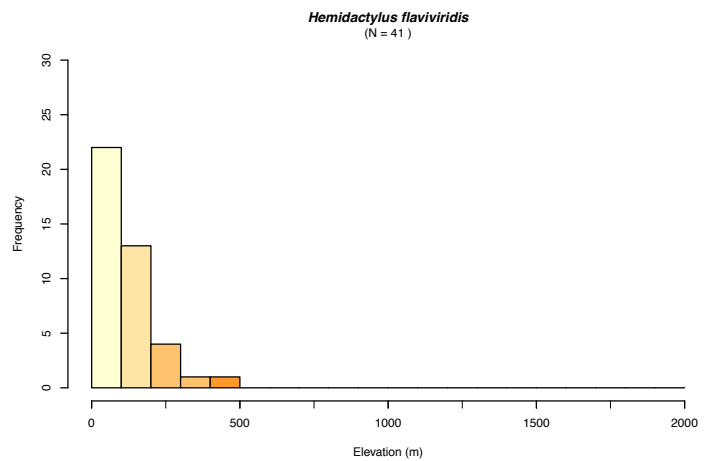

F

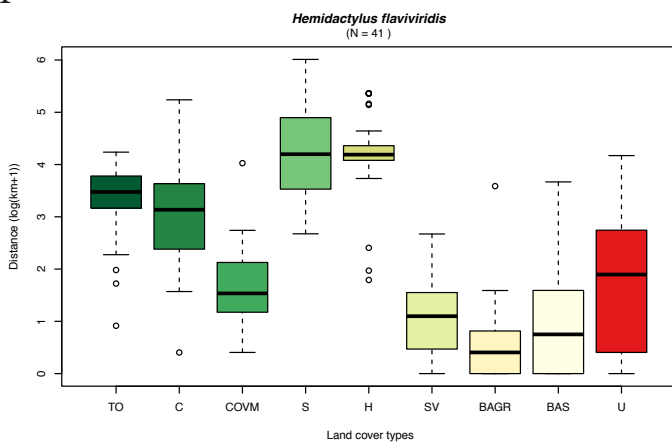

E

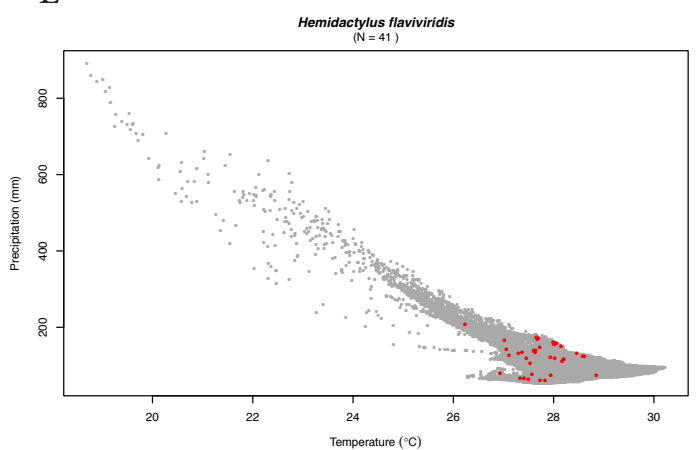

Lizards

Agamids

Geckos

Lacertids

Skinks

Amphisbaenids

Varanids

Snakes

Boidae

Colubridae

Lamproliidae

Leptotyphlopidae

Typhlopidae

Viperidae

***Hemidactylus persicus***  
Anderson, 1872

**S10: Species information**  
Lizards  
Geckos, Gekkonidae

A

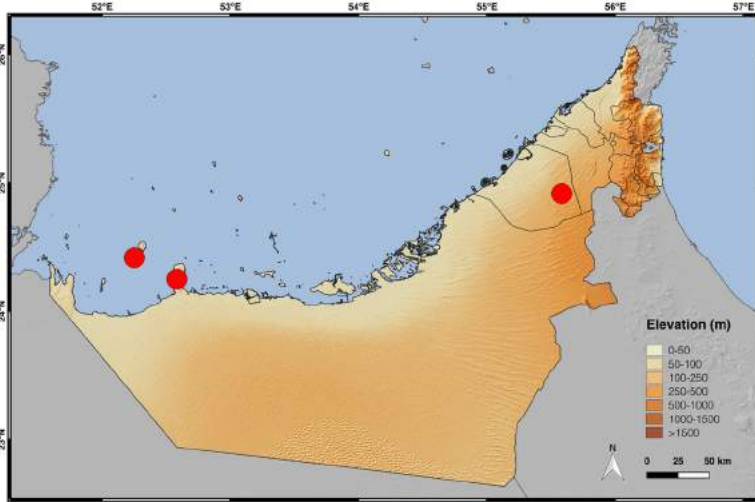

B

Useful information

|               |        |
|---------------|--------|
| IUCN Category | LC/VU  |
| Venomous      | NO     |
| Endemic       | NO     |
| Origin        | Native |

C

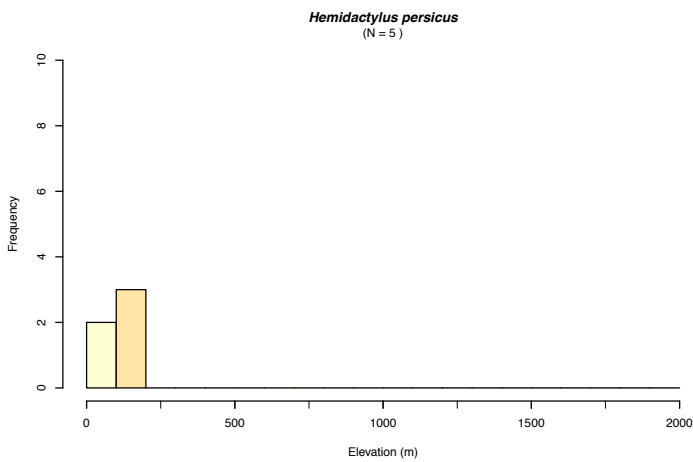

D

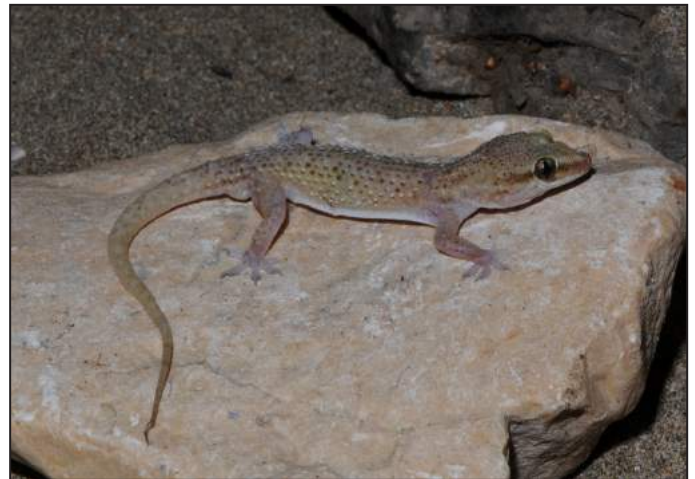

E

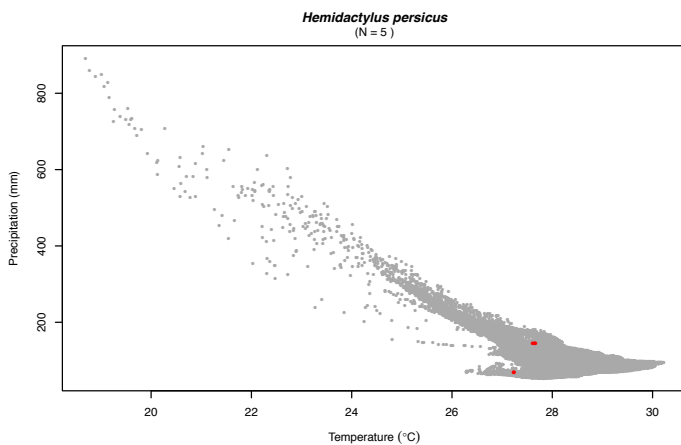

F

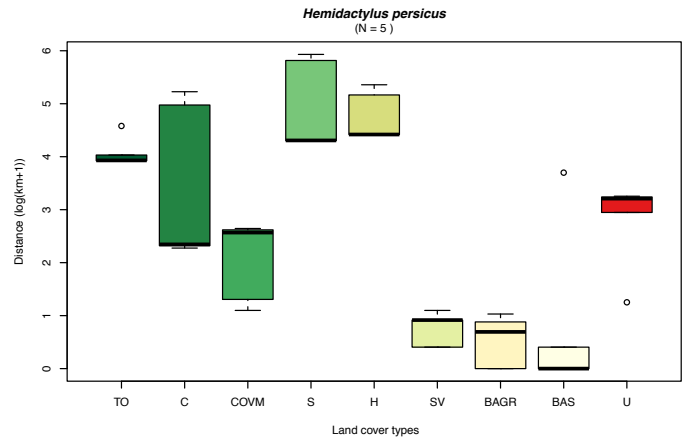

- Lizards
- Agamids
- Geckos
- Lacertids
- Skinks
- Ampeliscaenids
- Varamids
- Snakes
- Boidae
- Colubridae
- Lamprophiidae
- Leptotyphlopidae
- Typhlopidae
- Viperidae

**S11: Species information**

Lizards  
Geckos, Gekkonidae

*Hemidactylus robustus*

Heyden, 1827

B

Useful information

|               |        |
|---------------|--------|
| IUCN Category | LC/LC  |
| Venomous      | NO     |
| Endemic       | NO     |
| Origin        | Native |

A

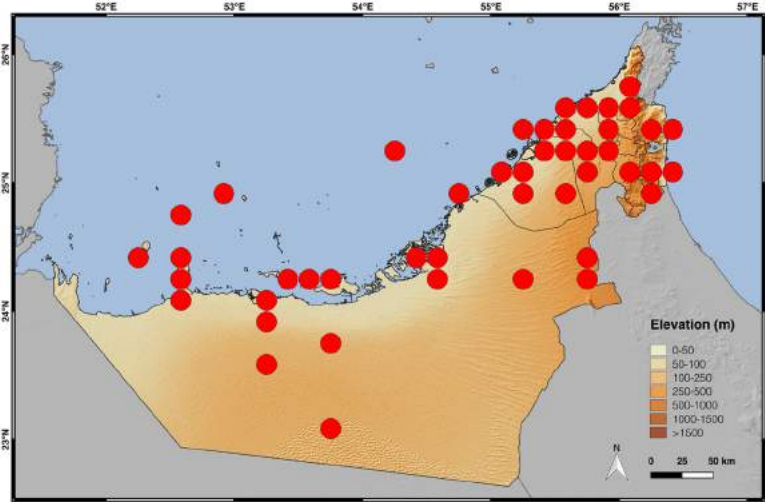

D

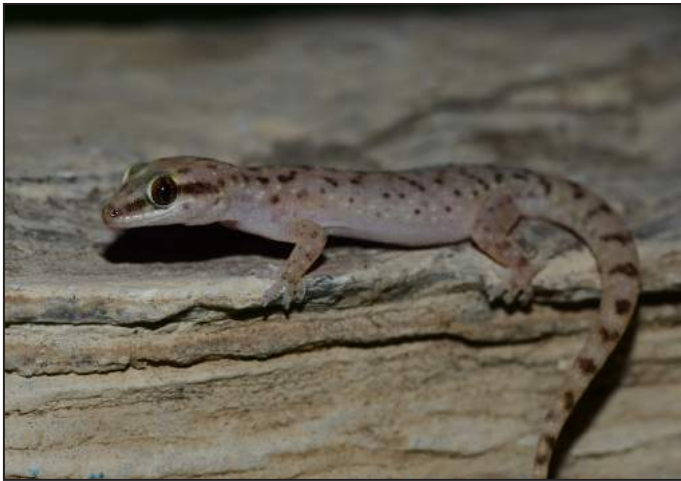

C

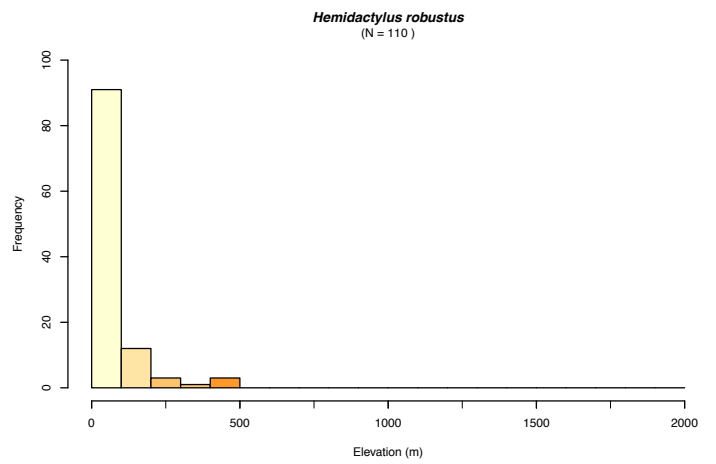

F

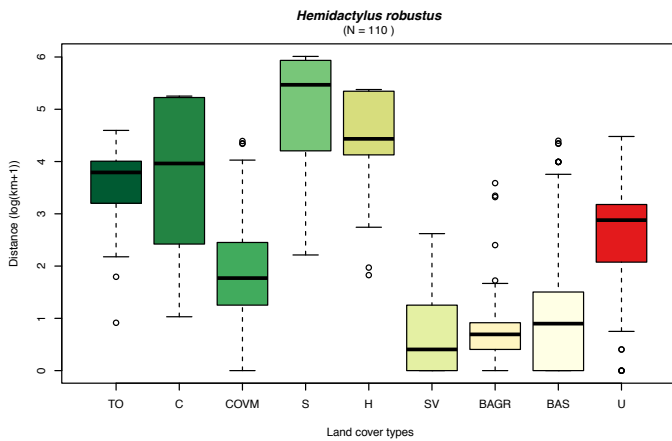

E

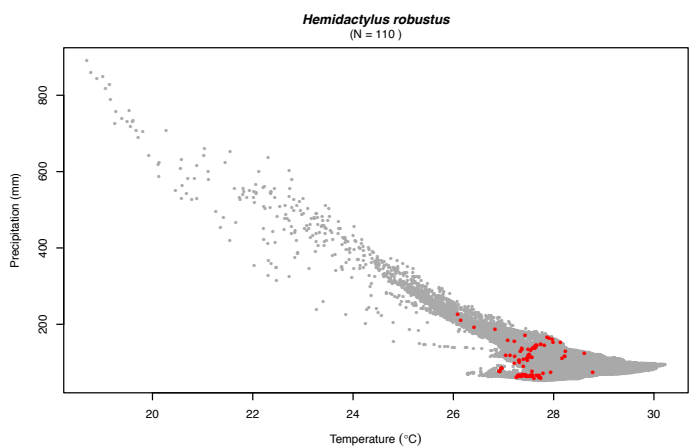

Lizards

Agamids

Geckos

Lacertids

Skinkis

Amphisbaenids

Varanids

Snakes

Boidae

Colubridae

Lamprophiidae

Leptotyphlopidae

Typhlopidae

Viperidae

***Pseudoceramodactylus khobarensis***  
 Haas, 1957

**S12: Species information**  
 Lizards  
 Geckos, Gekkonidae

- Lizards
- Agamids
- Geckos
- Lacertids
- Skinks
- Amphisbaenids
- Varamids
- Snakes
- Boidae
- Colubridae
- Lamprophiidae
- Leptotyphlopidae
- Typhlopidae
- Viperidae

A

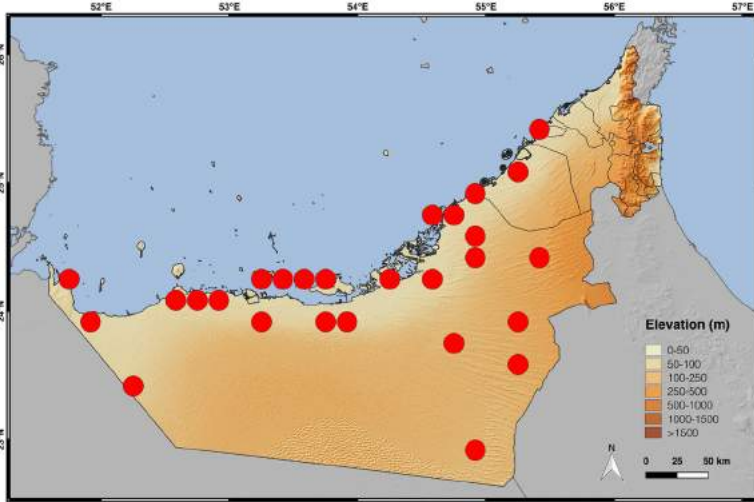

B

Useful information

|               |        |
|---------------|--------|
| IUCN Category | LC/LC  |
| Venomous      | NO     |
| Endemic       | NO     |
| Origin        | Native |

C

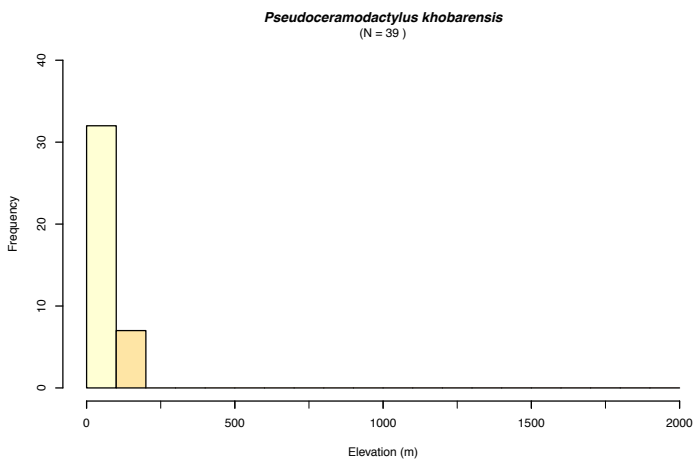

D

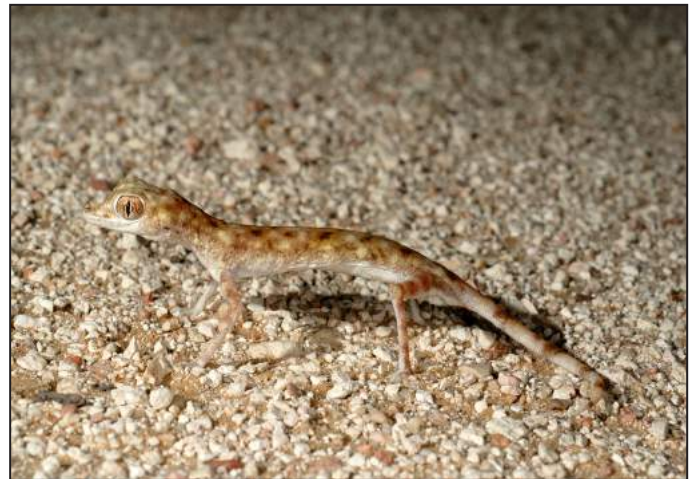

E

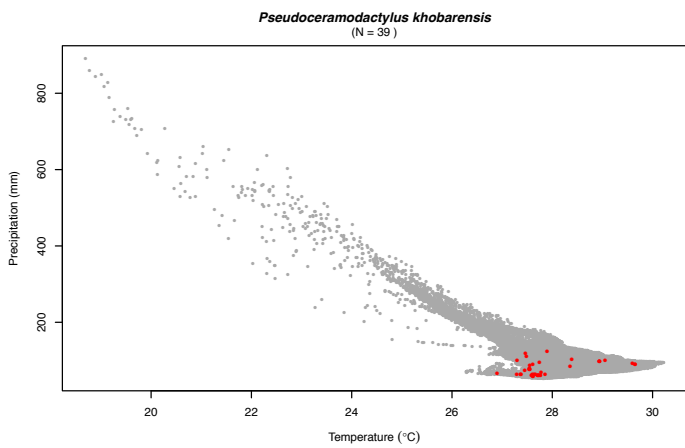

F

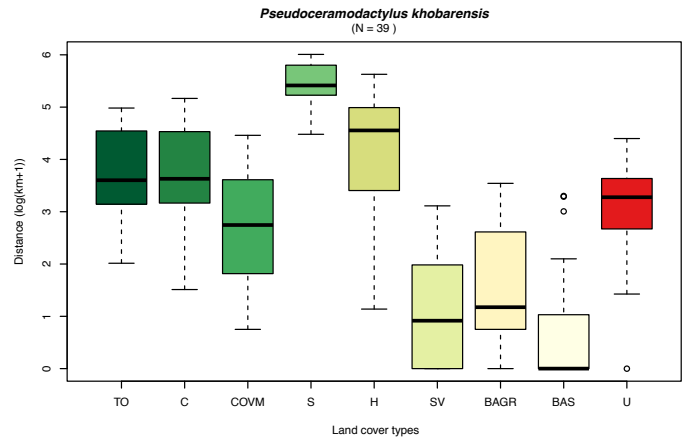

**S13: Species information**

Lizards  
Geckos, Gekkonidae

***Stenodactylus arabicus***  
(Haas, 1957)

- Lizards
- Agamids
- Geckos
- Lacertids
- Skinkis
- Amphisbaenids
- Varanids
- Snakes
- Boidae
- Colubridae
- Lamprophiidae
- Leptotyphlopidae
- Typhlopidae
- Viperidae

B

Useful information

|               |        |
|---------------|--------|
| IUCN Category | LC/LC  |
| Venomous      | NO     |
| Endemic       | NO     |
| Origin        | Native |

A

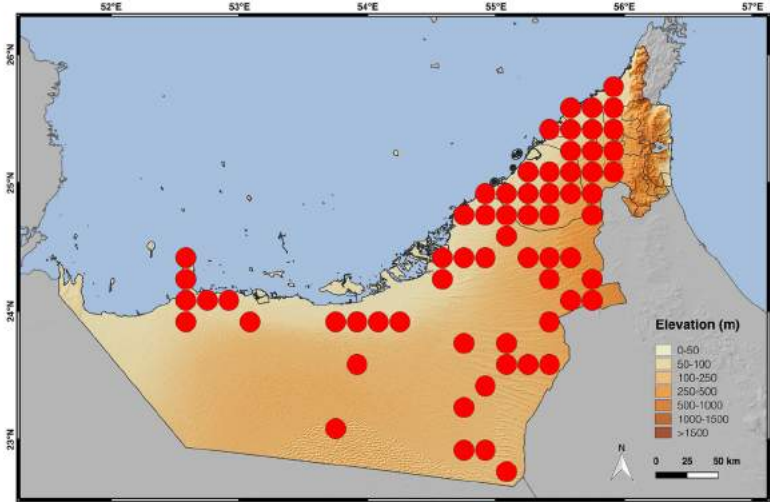

D

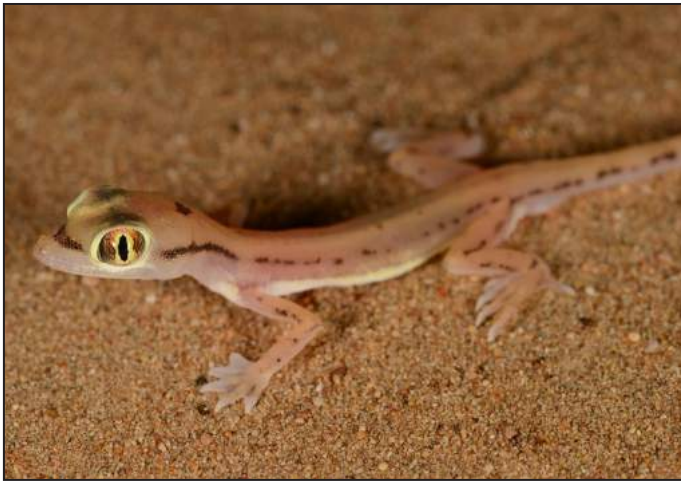

C

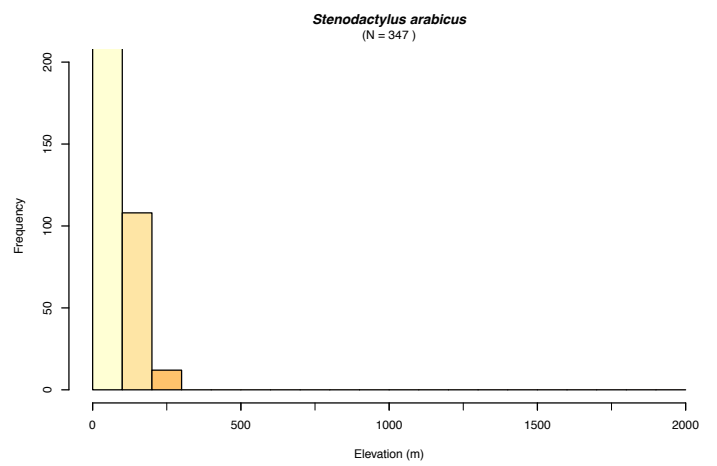

F

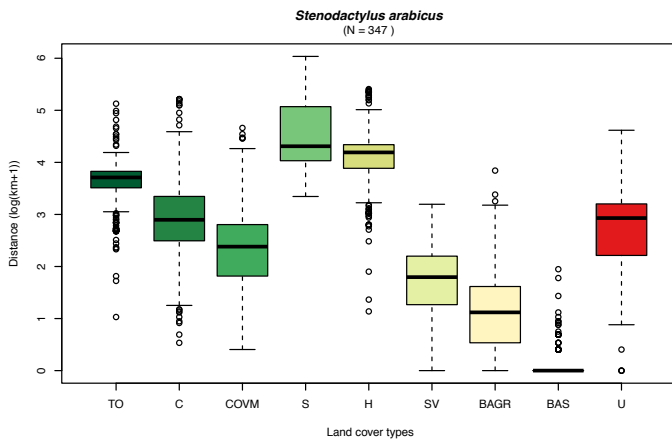

E

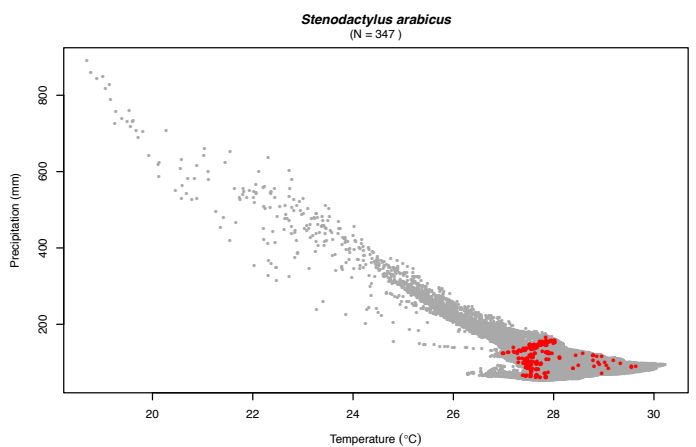

***Stenodactylus doriae***  
(Blanford, 1874)

**S14: Species information**  
Lizards  
Geckos, Gekkonidae

- Lizards
- Agamids
- Geckos
- Lacertids
- Skinks
- Amphisbaenids
- Varamids
- Snakes
- Boidae
- Colubridae
- Lamprophiidae
- Leptotyphlopidae
- Typhlopidae
- Viperidae

A

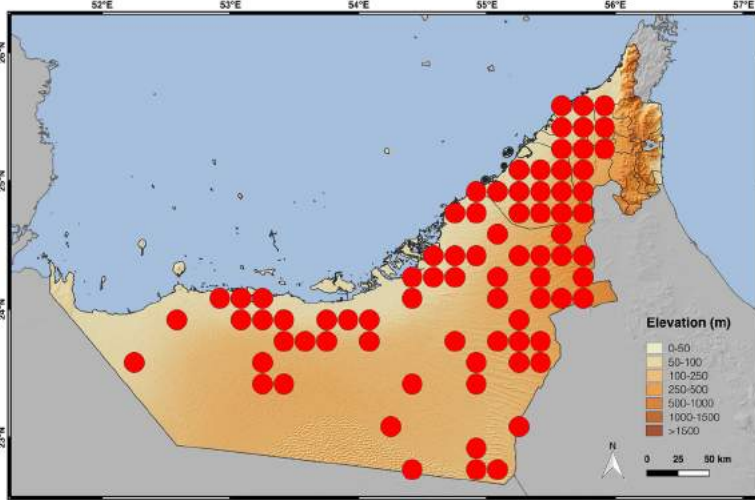

B

Useful information

|               |        |
|---------------|--------|
| IUCN Category | LC/LC  |
| Venomous      | NO     |
| Endemic       | NO     |
| Origin        | Native |

C

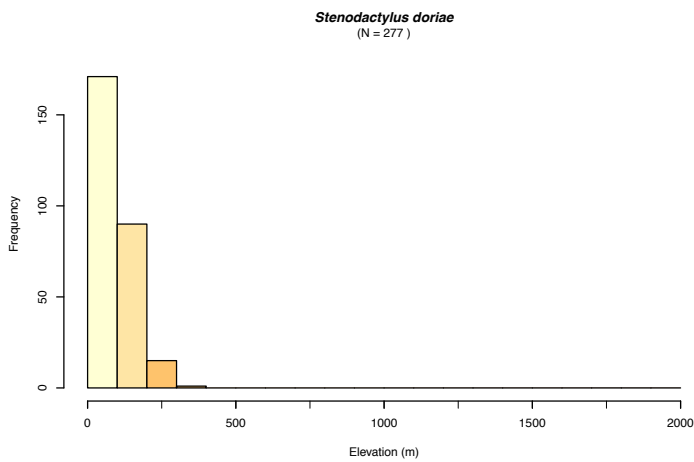

D

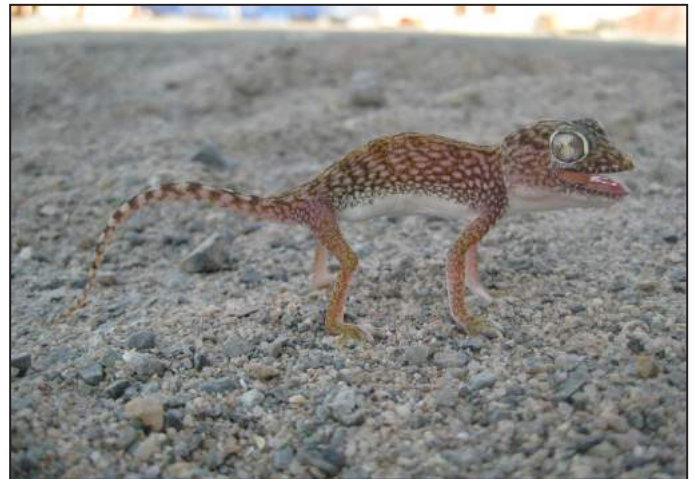

E

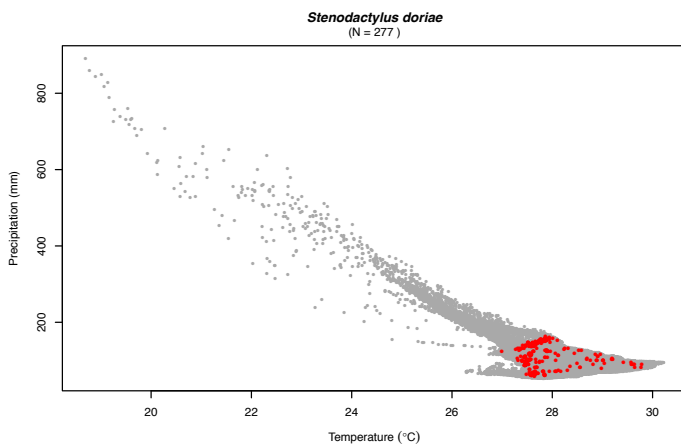

F

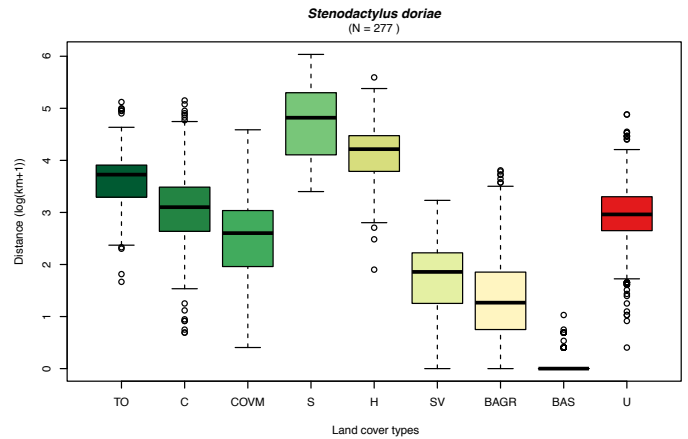

**S15: Species information**

Lizards  
Geckos, Gekkonidae

***Stenodactylus leptocosymbotes***  
Leviton & Anderson, 1967

Lizards

Agamids

Geckos

Lacertids

Skinkis

Amphisbaenids

Varanids

Snakes

Boidae

Colubridae

Lamprophiidae

Leptotyphlopidae

Typhlopidae

Viperidae

B

Useful information

|               |        |
|---------------|--------|
| IUCN Category | LC/LC  |
| Venomous      | NO     |
| Endemic       | NO     |
| Origin        | Native |

A

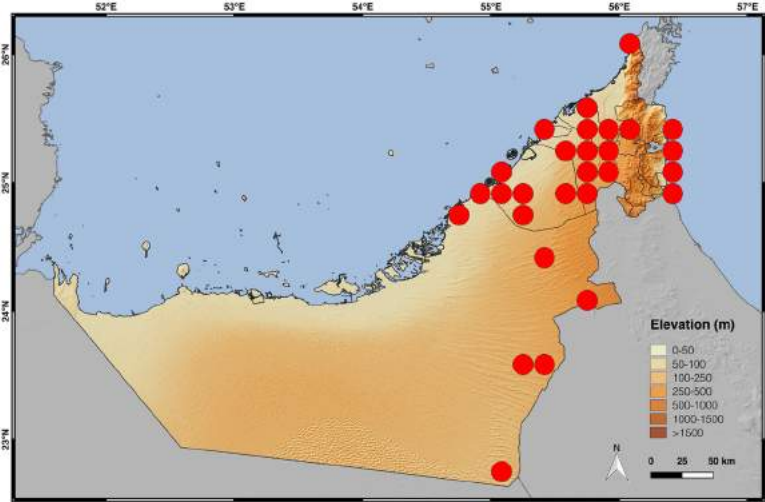

D

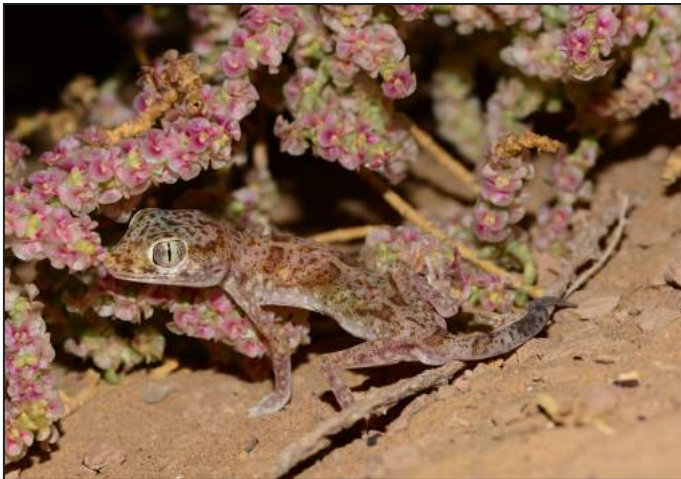

C

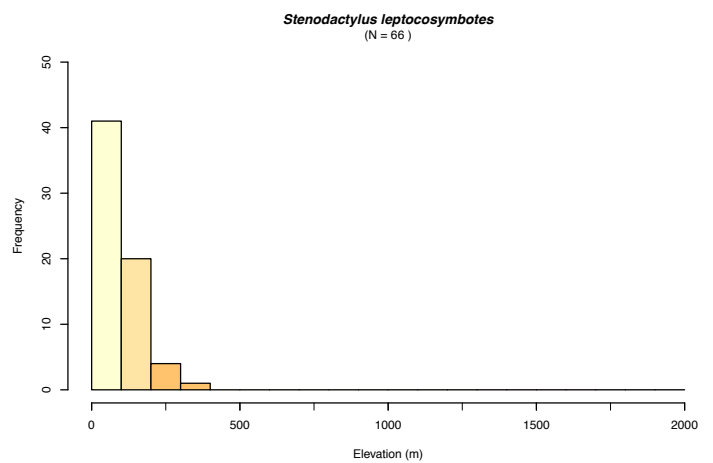

F

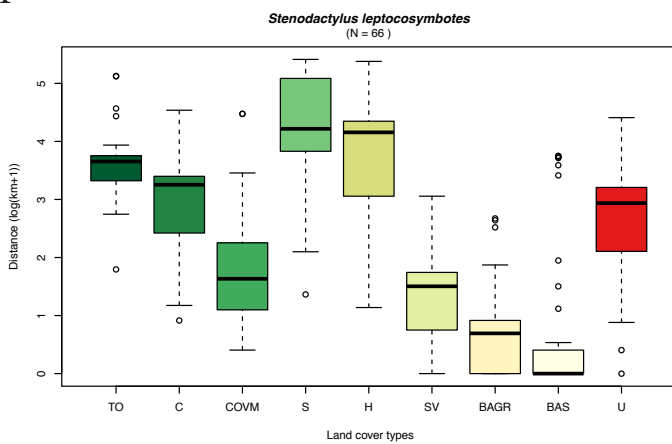

E

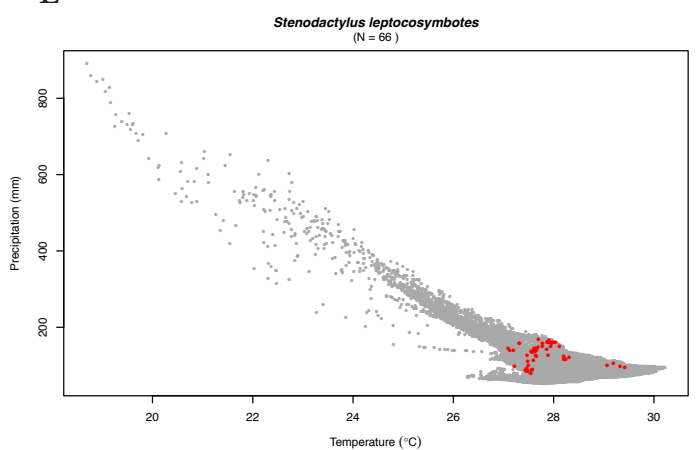



***Stenodactylus slevini***

Haas, 1957

**S16: Species information**

Lizards

Geckos, Gekkonidae

A

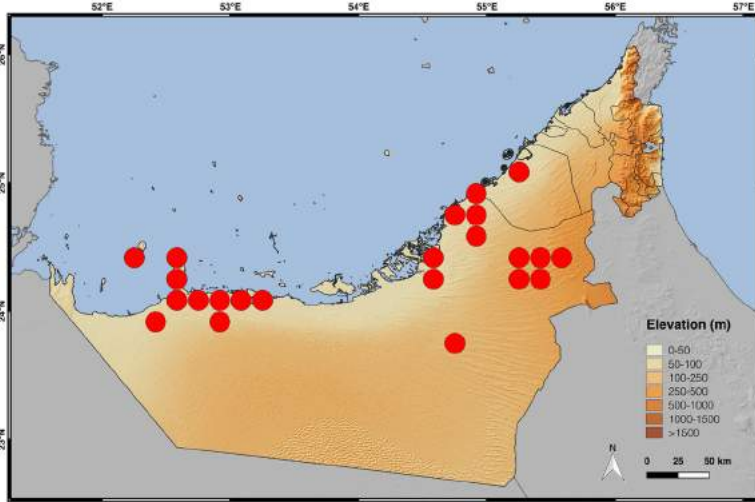

B

Useful information

|               |        |
|---------------|--------|
| IUCN Category | LC/LC  |
| Venomous      | NO     |
| Endemic       | NO     |
| Origin        | Native |

C

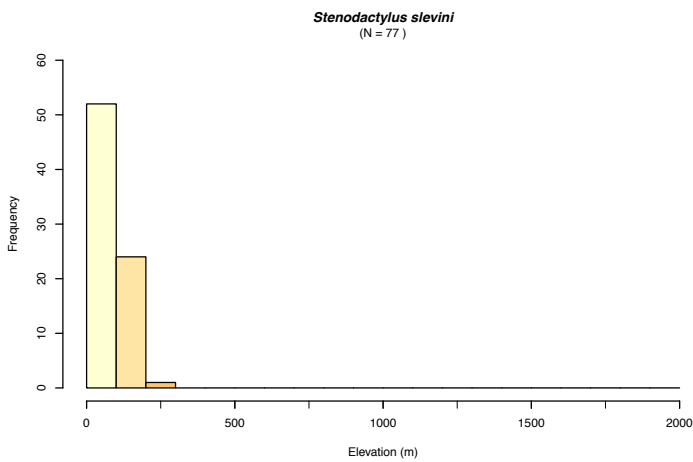

D

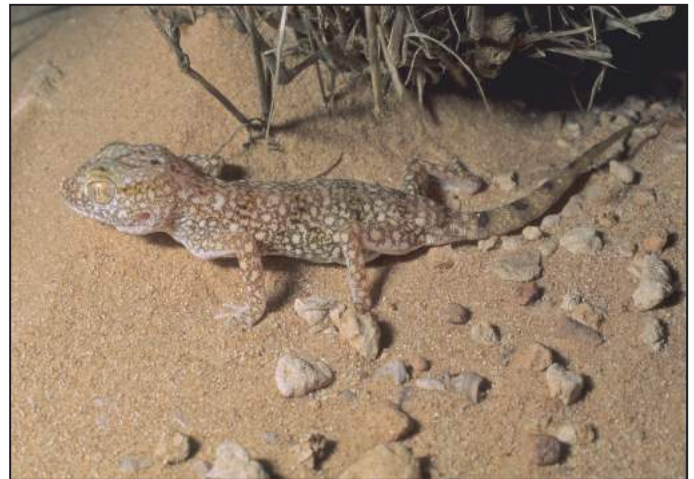

E

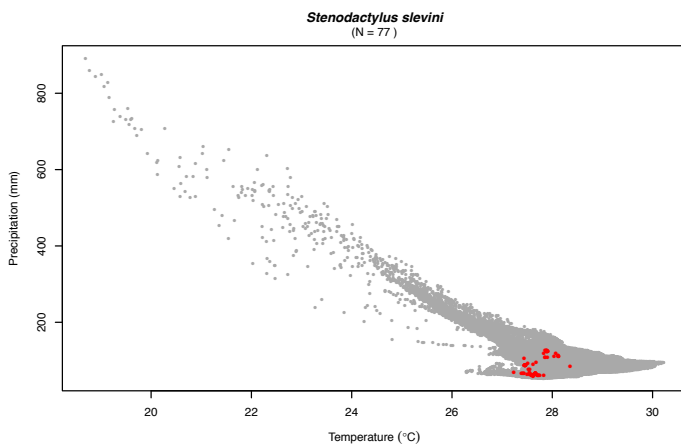

F

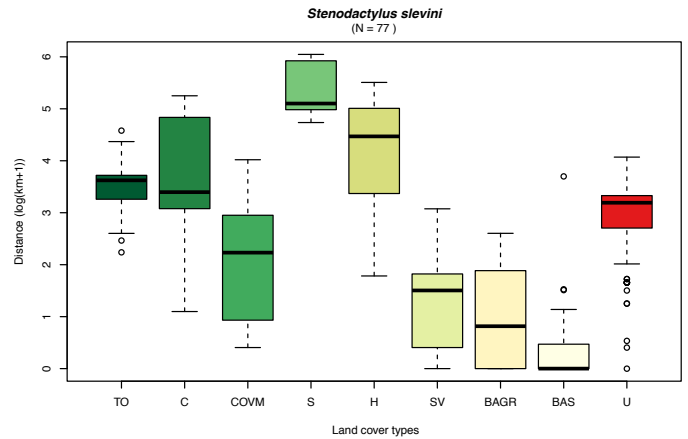

- Lizards
- Agamids
- Geckos
- Lacertids
- Skinks
- Ampeliscaenids
- Varamids
- Snakes
- Boidae
- Colubridae
- Lamprophiidae
- Leptotyphlopidae
- Typhlopidae
- Viperidae

**S17: Species information**

Lizards  
Geckos, Gekkonidae

*Trachydactylus hajarensis*  
(Arnold, 1980)

- Lizards
- Agamids
- Geckos
- Lacertids
- Skinkis
- Amphisbaenids
- Varanids
- Snakes
- Boidae
- Colubridae
- Lamprophiidae
- Leptotyphlopidae
- Typhlopidae
- Viperidae

B

Useful information

|               |        |
|---------------|--------|
| IUCN Category | NE/LC  |
| Venomous      | NO     |
| Endemic       | NO     |
| Origin        | Native |

A

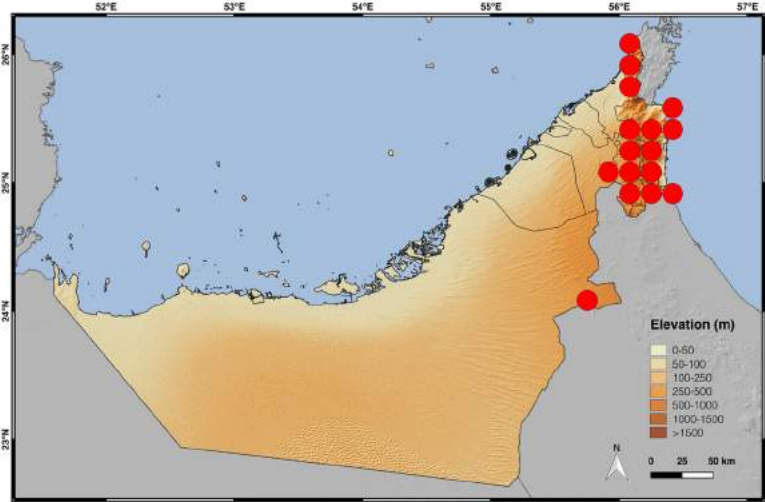

D

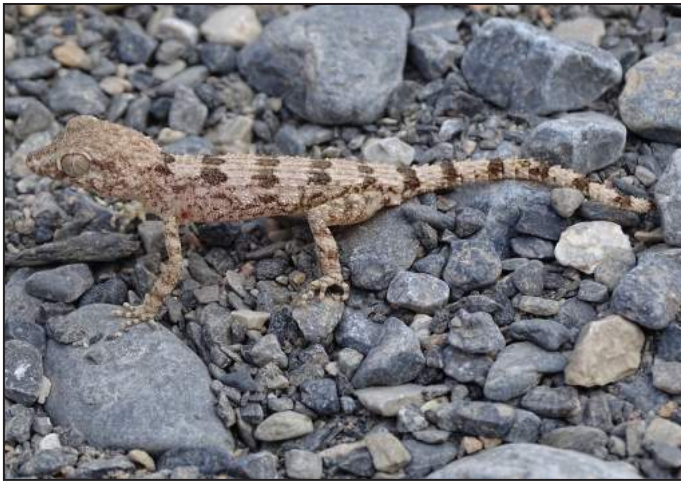

C

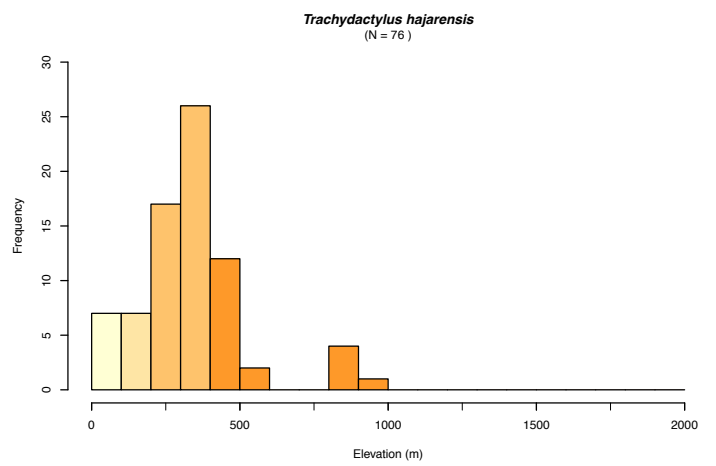

F

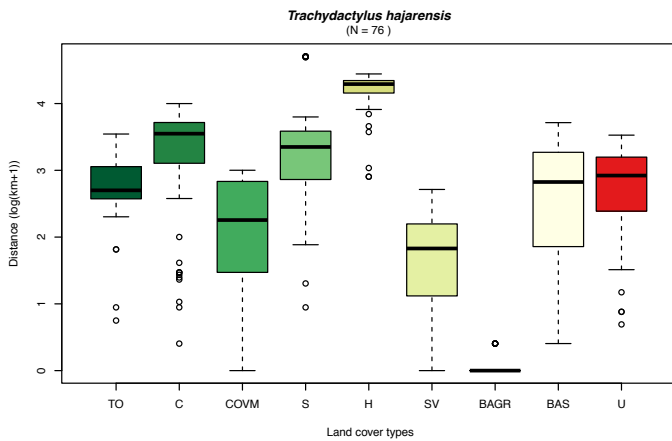

E

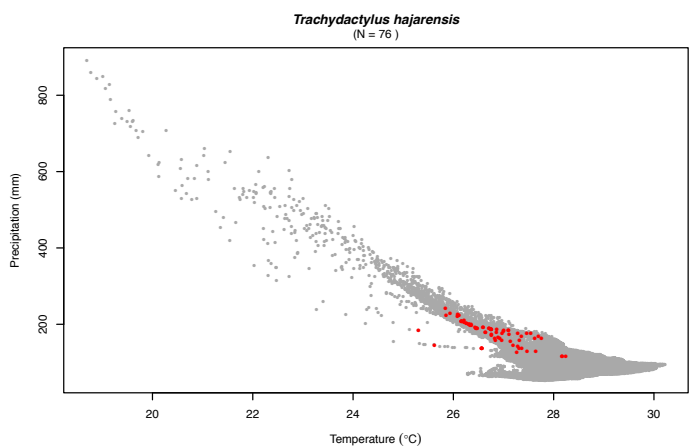

***Asaccus caudivolvulus***  
**Arnold & Gardner, 1994**

**S18: Species information**  
 Lizards  
 Geckos, Phyllodactylidae

- Lizards
- Agamids
- Geckos
- Lacertids
- Skinks
- Ampeliscaenids
- Varamids
- Snakes
- Boidae
- Colubridae
- Lamprophiidae
- Leptotyphlopidae
- Typhlopidae
- Viperidae

A

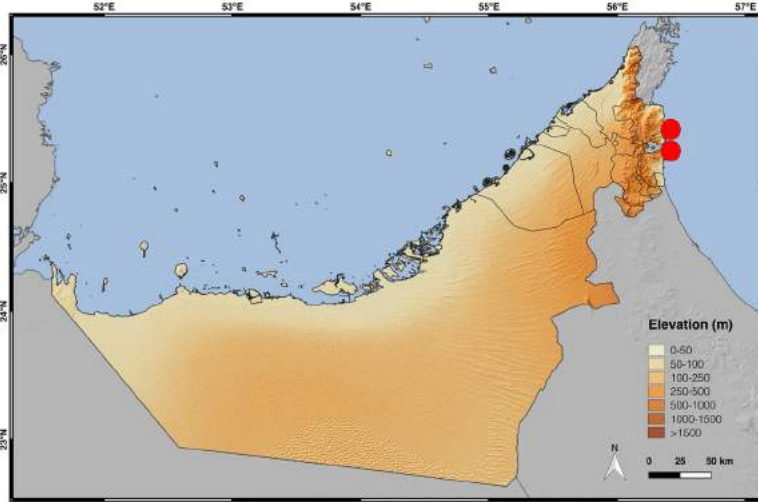

B

Useful information

|               |        |
|---------------|--------|
| IUCN Category | LC/CR  |
| Venomous      | NO     |
| Endemic       | YES    |
| Origin        | Native |

C

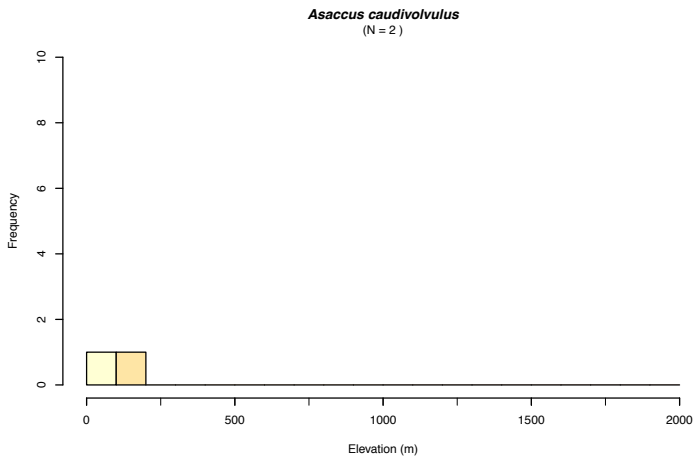

D

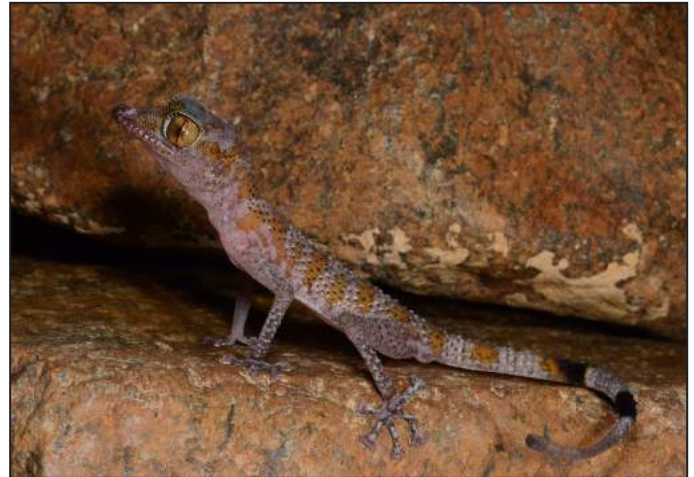

E

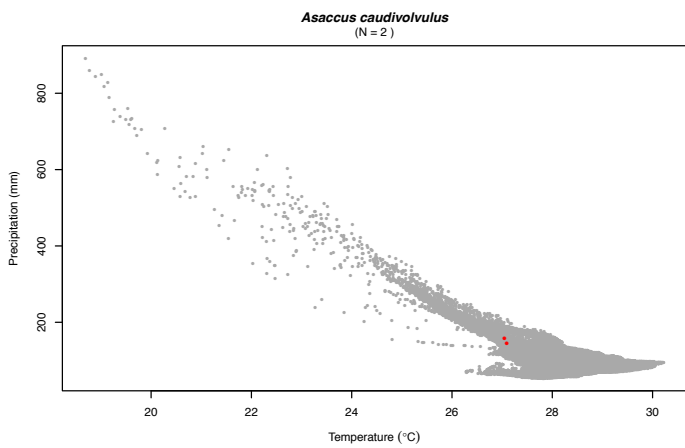

F

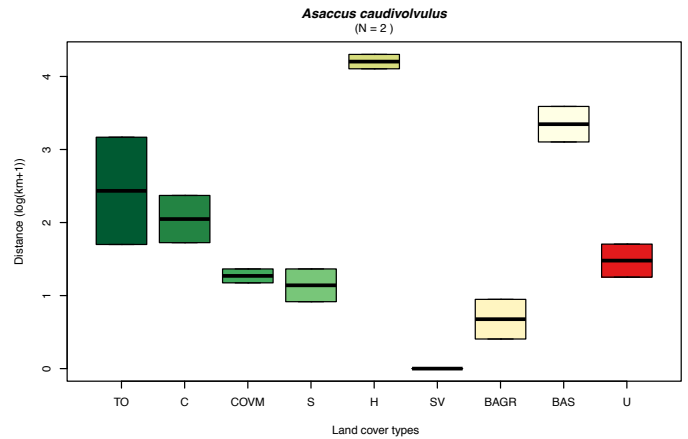

**S19: Species information**

Lizards  
Geckos, Phyllodactylidae

***Asaccus gallagheri***  
(Arnold, 1972)

B

Useful information

|               |        |
|---------------|--------|
| IUCN Category | LC/LC  |
| Venomous      | NO     |
| Endemic       | NO     |
| Origin        | Native |

A

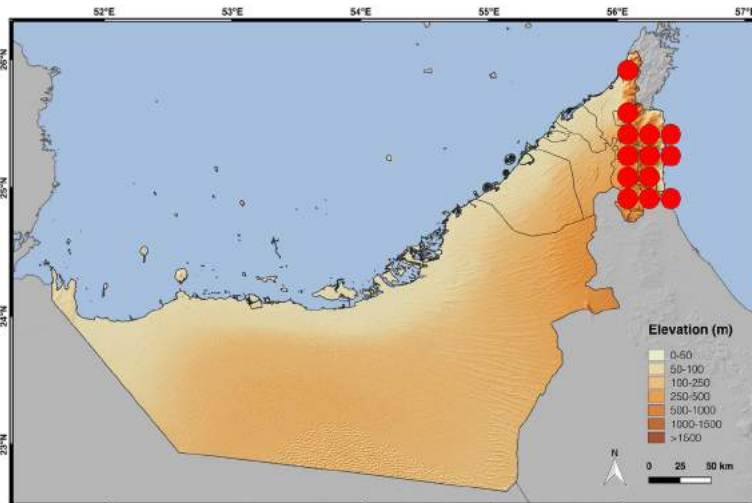

D

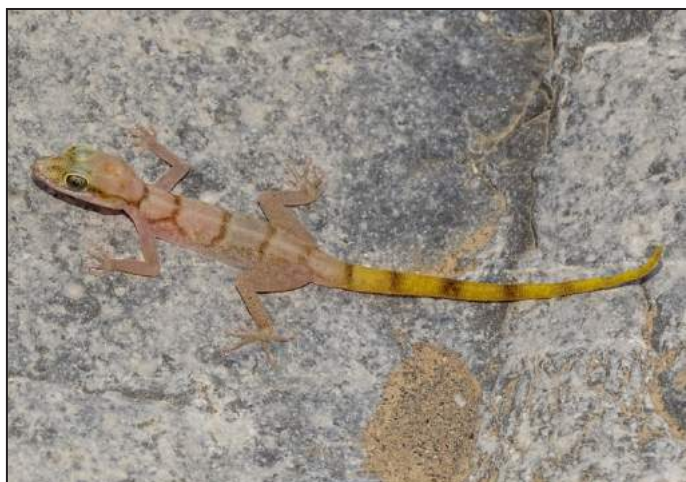

C

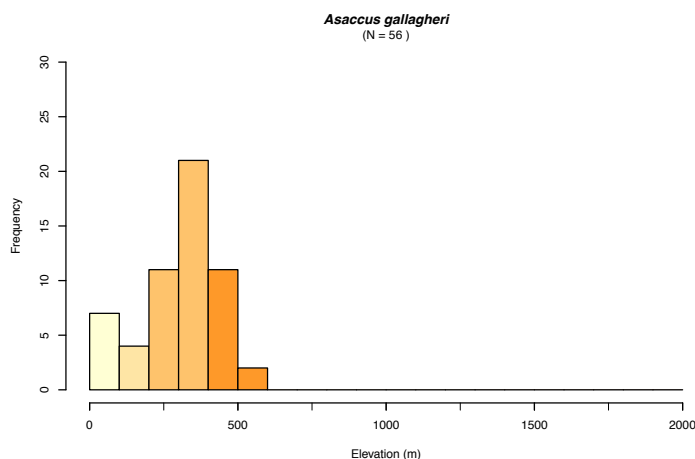

F

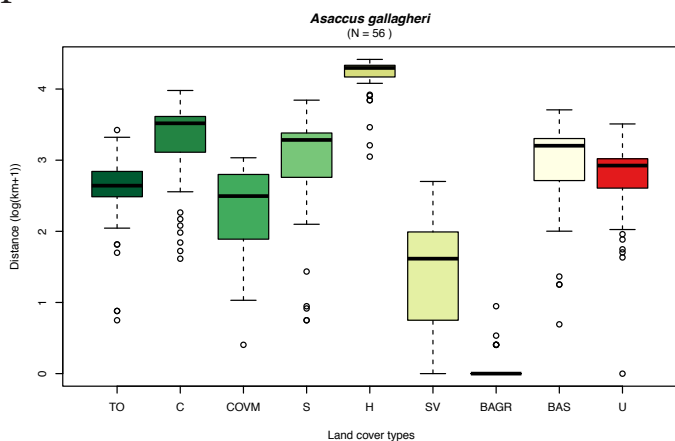

E

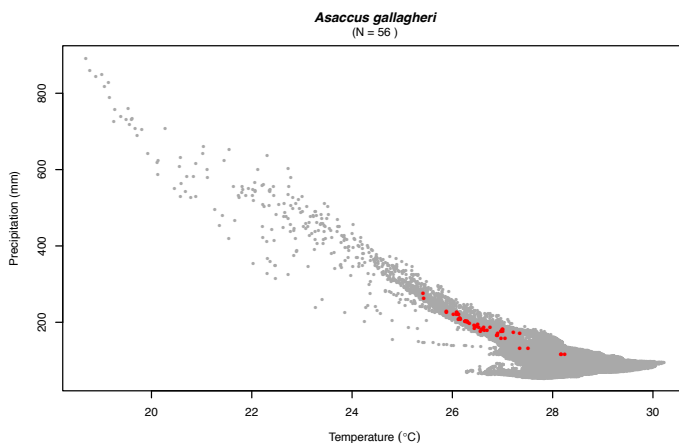

- Lizards
- Agamids
- Geckos
- Lacertids
- Skinkis
- Amphisbaenids
- Varanids
- Snakes
- Boidae
- Colubridae
- Lamprophiidae
- Leptotyphlopidae
- Typhlopidae
- Viperidae

***Asaccus gardneri***

Carranza, Simó-Riudalbas, Jayasinghe, Wilms & Els, 2016

**S20: Species information**

Lizards

Geckos, Phyllodactylidae

A

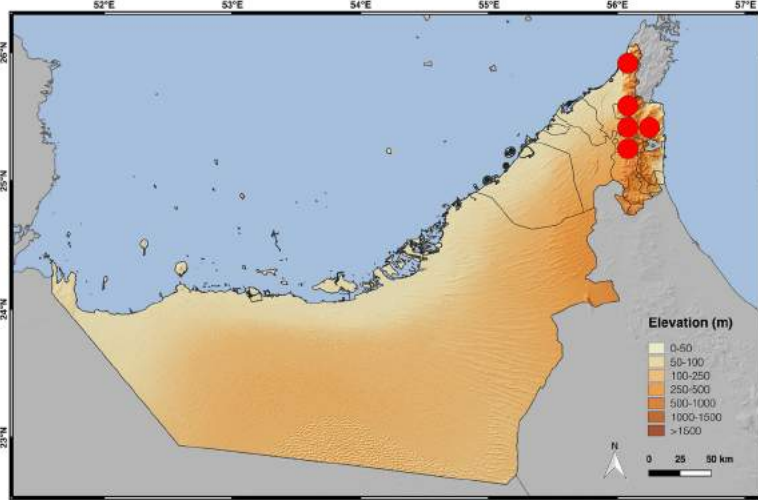

B

Useful information

|               |        |
|---------------|--------|
| IUCN Category | NE/LC  |
| Venomous      | NO     |
| Endemic       | NO     |
| Origin        | Native |

C

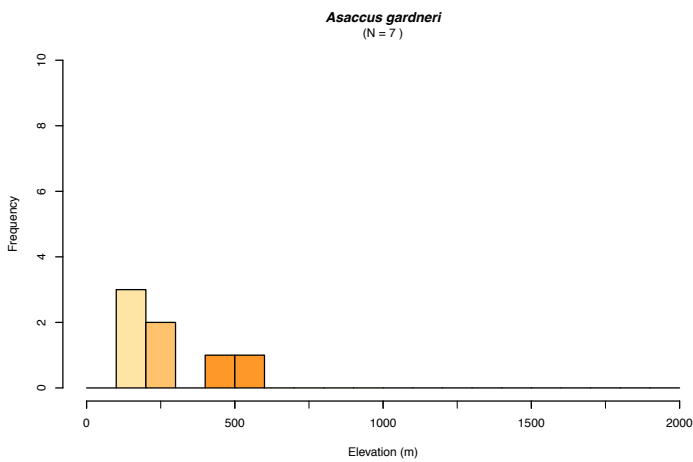

D

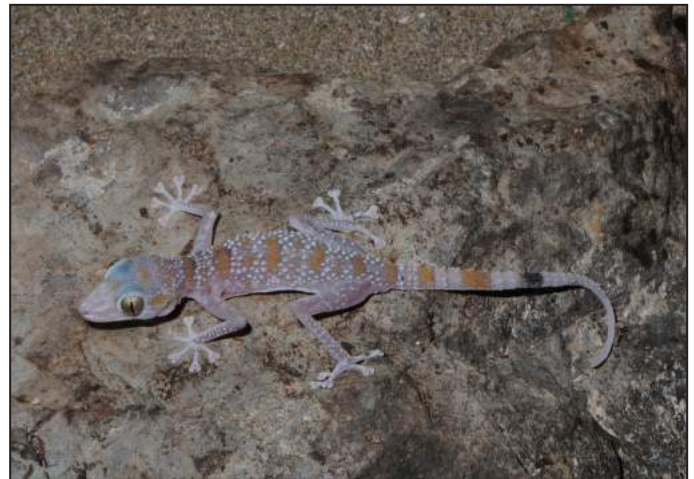

E

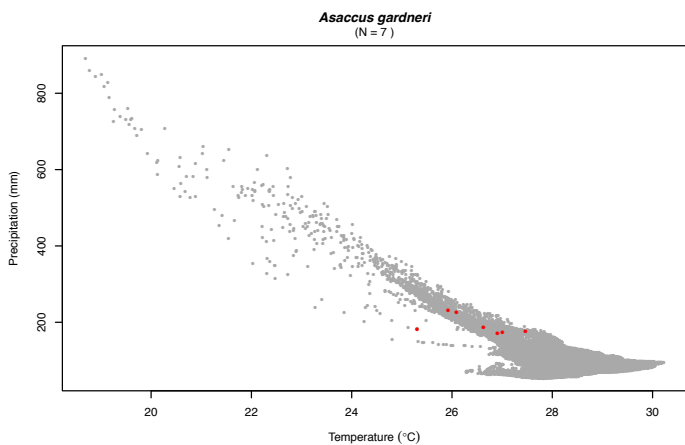

F

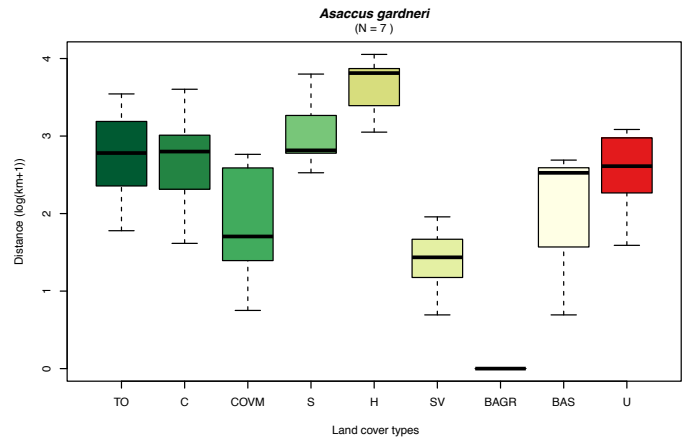

- Lizards
- Agamids
- Geckos
- Lacertids
- Skinks
- Amphisbaenids
- Varamids
- Snakes
- Boidae
- Colubridae
- Lamprophiidae
- Leptotyphlopidae
- Typhlopidae
- Viperidae

**S21: Species information**

Lizards  
Geckos, Phyllodactylidae

*Asaccus margaritae*  
Carranza, Simó-Riudalbas, Jayasinghe, Wilms & Els, 2016

B

Useful information

|               |        |
|---------------|--------|
| IUCN Category | NE/VU  |
| Venomous      | NO     |
| Endemic       | NO     |
| Origin        | Native |

A

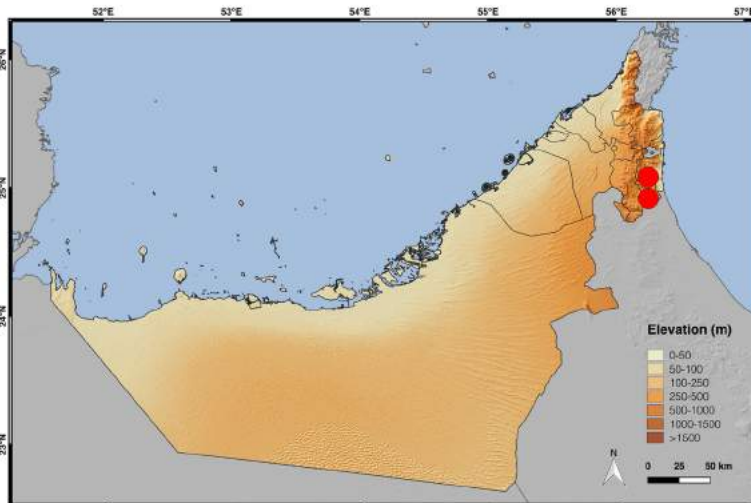

D

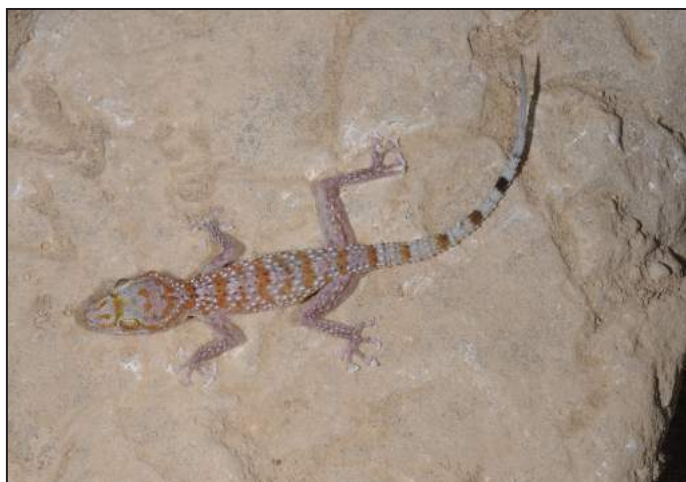

C

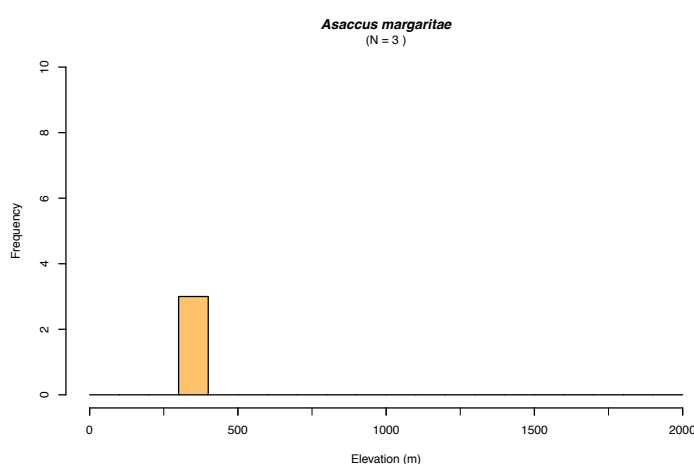

F

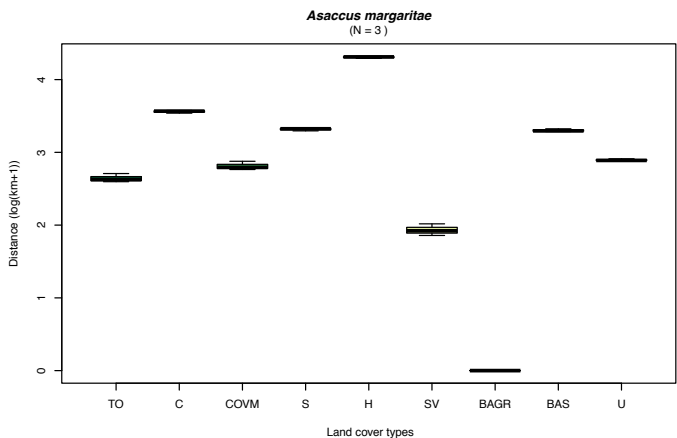

E

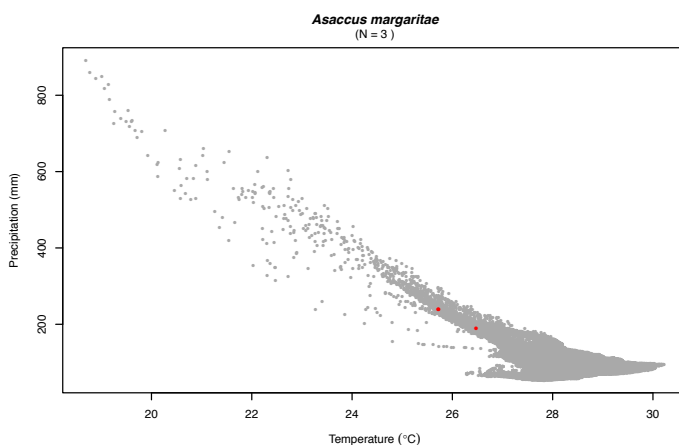

- Lizards
- Agamids
- Geckos
- Lacertids
- Skinkis
- Amphisbaenids
- Varanids
- Snakes
- Boidae
- Colubridae
- Lamproliidae
- Leptotyphlopidae
- Typhlopidae
- Viperidae

***Ptyodactylus orlovi***  
 Nazarov, Melnikov & Melnikova, 2013

**S22: Species information**  
 Lizards  
 Geckos, Phyllodactylidae

- Lizards
- Agamids
- Geckos
- Lacertids
- Skinks
- Ampeliscaenids
- Varamids
- Snakes
- Boidae
- Colubridae
- Lamprophiidae
- Leptotyphlopidae
- Typhlopidae
- Viperidae

A

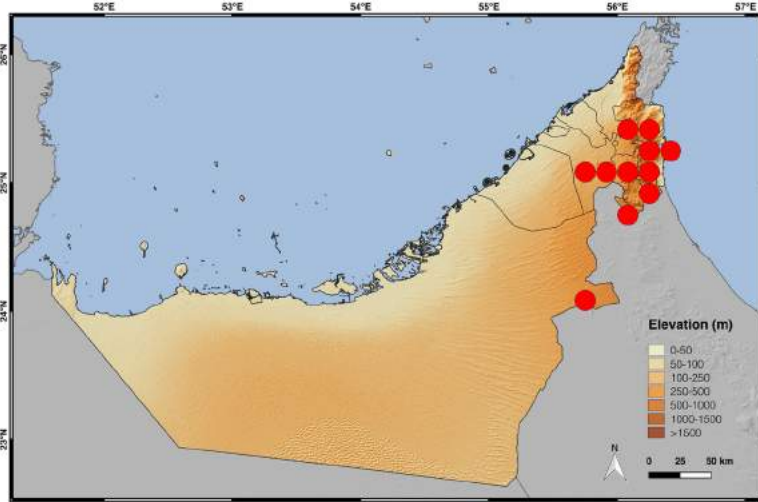

B

Useful information

|               |        |
|---------------|--------|
| IUCN Category | NE/LC  |
| Venomous      | NO     |
| Endemic       | NO     |
| Origin        | Native |

C

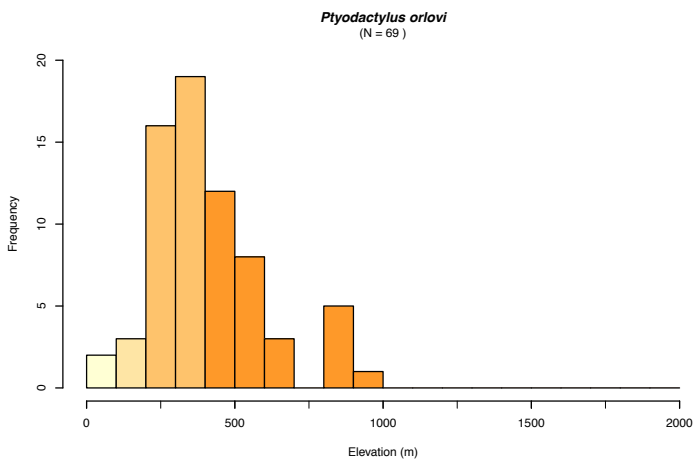

D

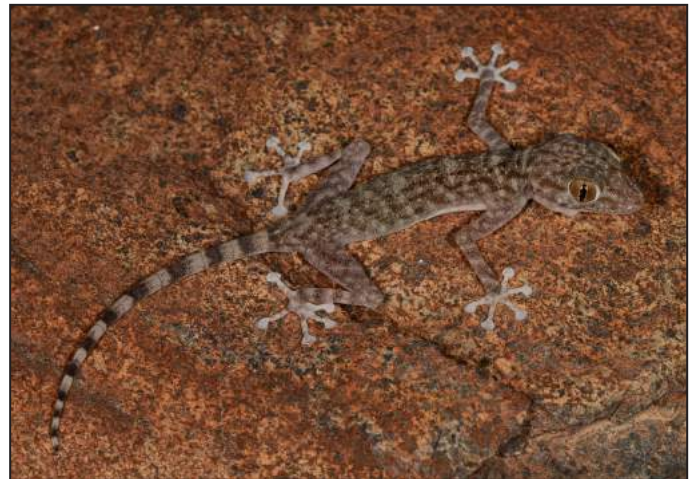

E

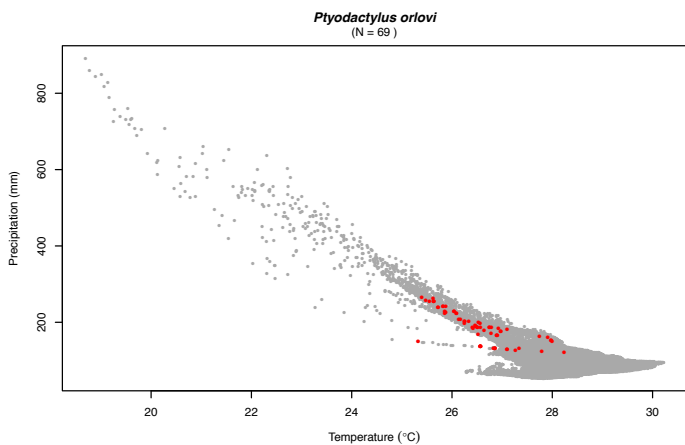

F

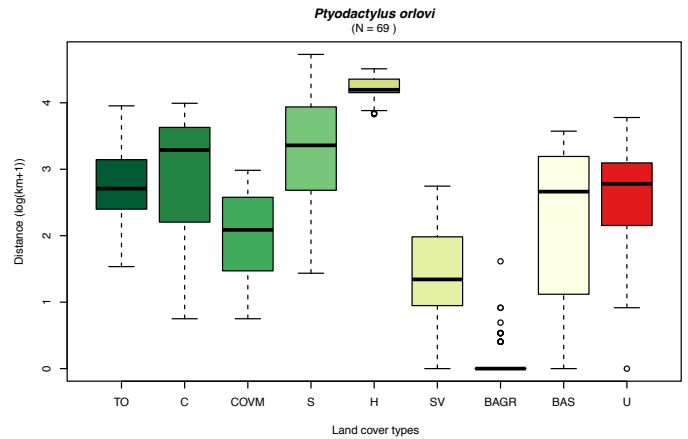

**S23: Species information**

Lizards  
Geckos, Phyllodactylidae

*Ptyodactylus ruusaljibalicus*  
Simó-Riudalbas, Metallinou, Pous, Els, Jayasinghe, Pentek-Zakar, Wilms, Al-Saadi & Carranza, 2017

B

Useful information

|               |        |
|---------------|--------|
| IUCN Category | NE/LC  |
| Venomous      | NO     |
| Endemic       | NO     |
| Origin        | Native |

A

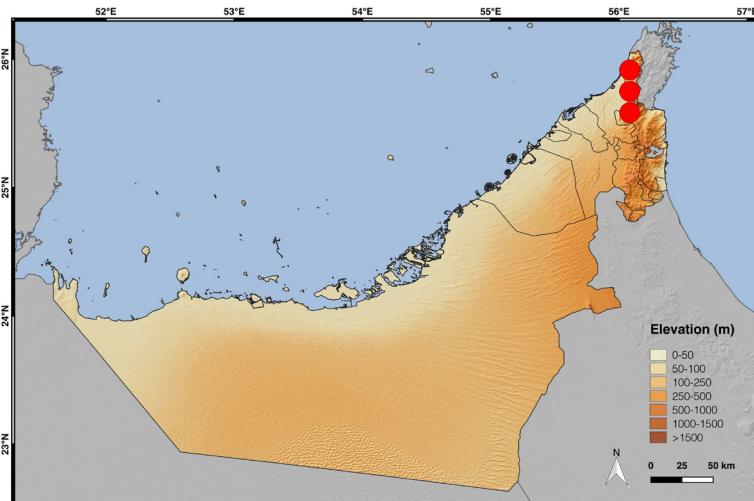

D

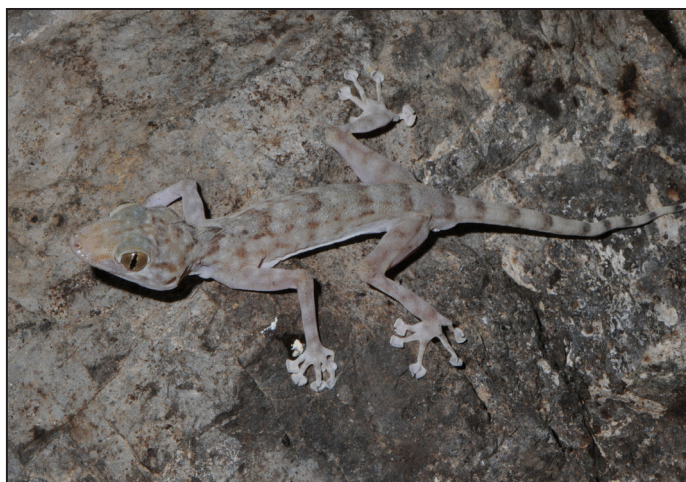

C

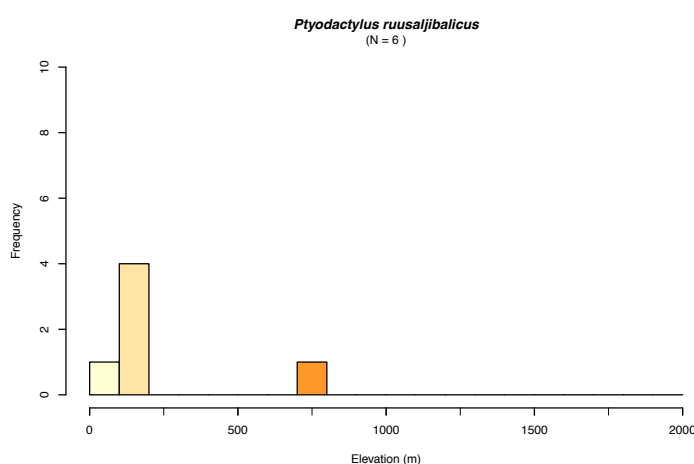

F

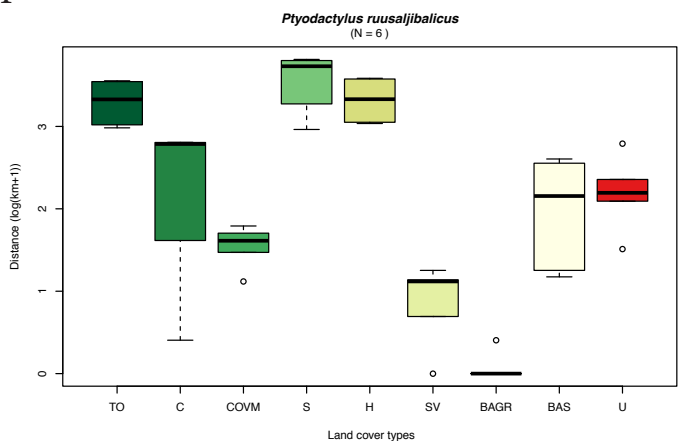

E

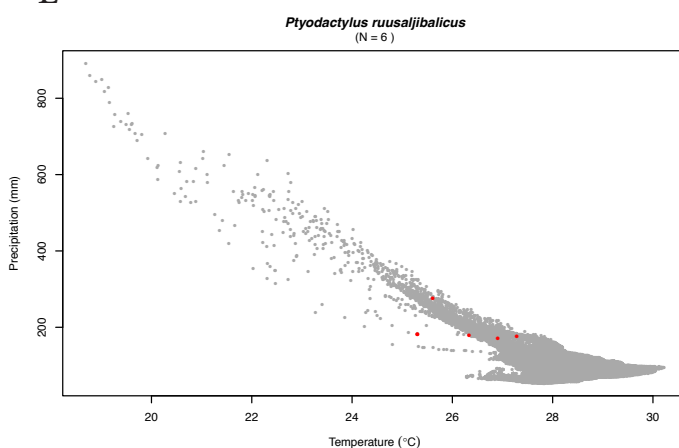

- Lizards
- Agamids
- Geckos
- Lacertids
- Skinks
- Amphisbaenids
- Varanids
- Snakes
- Boidae
- Colubridae
- Lamprophiidae
- Leptotyphlopidae
- Typhlopidae
- Viperidae



***Pristurus carteri***  
(Gray, 1863)

**S24: Species information**  
Lizards  
Geckos, Sphaerodactylidae

- Lizards
- Agamids
- Geckos
- Lacertids
- Skinks
- Ampeliscaenids
- Varamids
- Snakes
- Boidae
- Colubridae
- Lamprophiidae
- Leptotyphlopidae
- Typhlopidae
- Viperidae

A

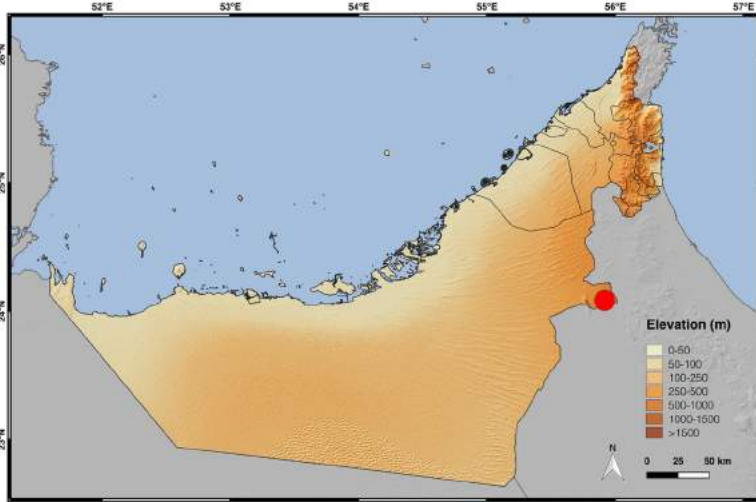

B

Useful information

|               |        |
|---------------|--------|
| IUCN Category | LC/CR  |
| Venomous      | NO     |
| Endemic       | NO     |
| Origin        | Native |

C

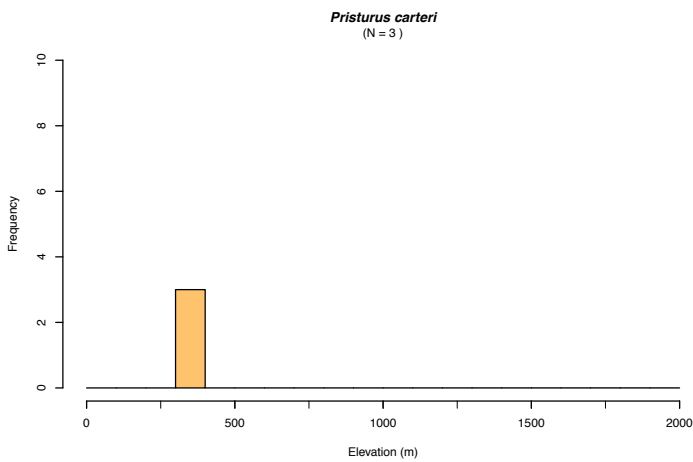

D

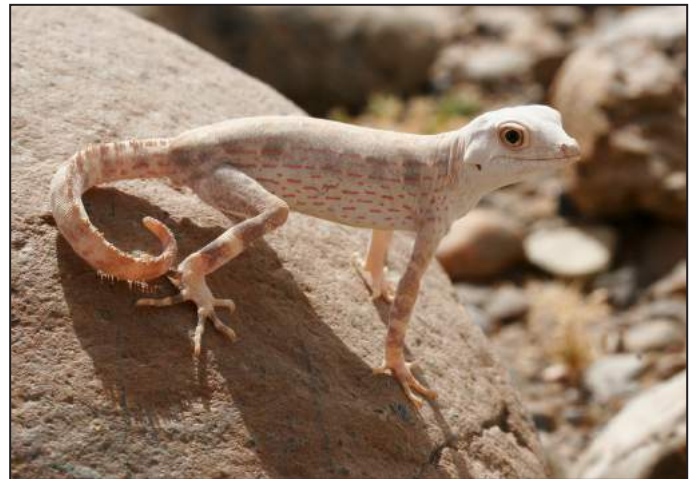

E

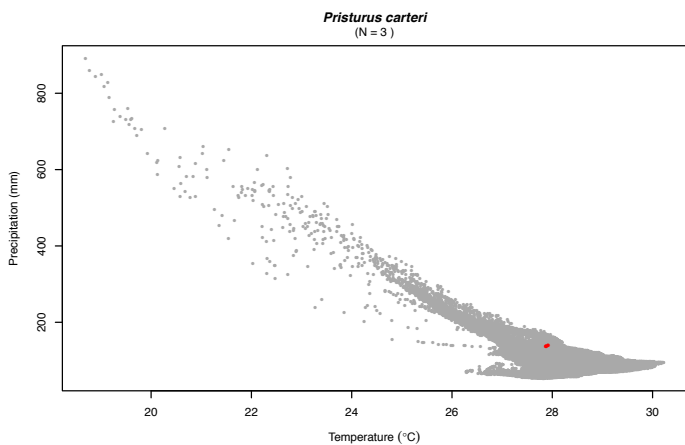

F

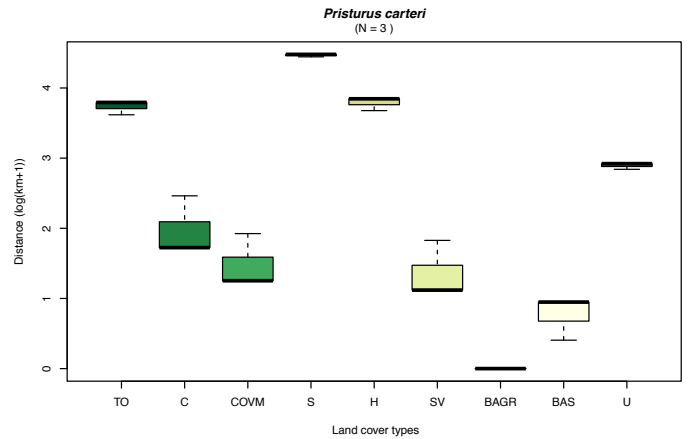

**S25: Species information**

Lizards  
Geckos, Sphaerodactylidae

*Pristurus celerrimus*  
Arnold, 1977

B

Useful information

|               |        |
|---------------|--------|
| IUCN Category | LC/LC  |
| Venomous      | NO     |
| Endemic       | NO     |
| Origin        | Native |

A

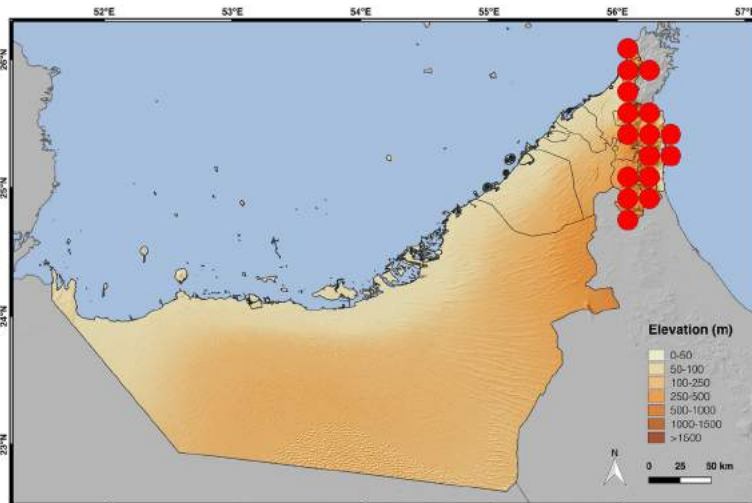

D

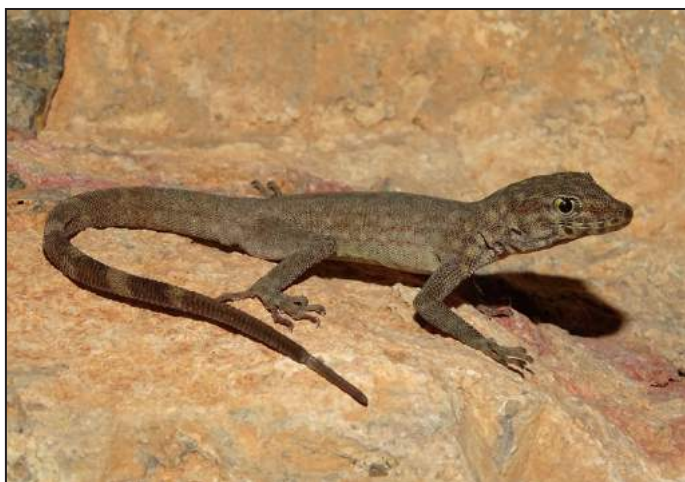

C

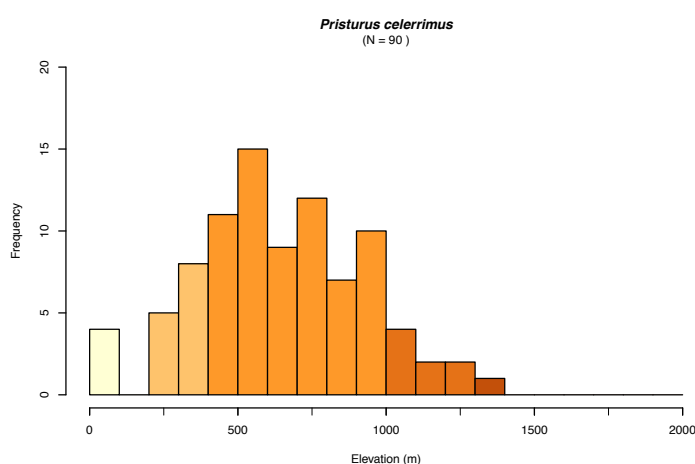

F

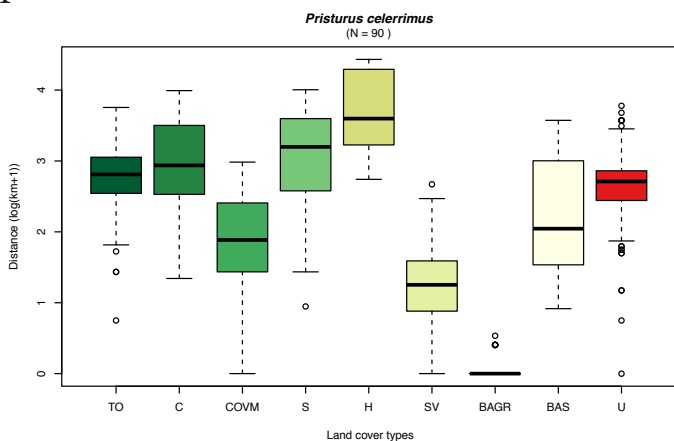

E

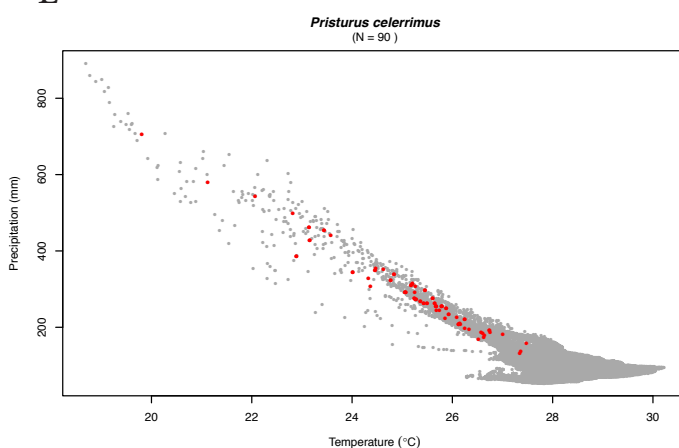

- Lizards
- Agamids
- Geckos
- Lacertids
- Skinkis
- Amphisbaenids
- Varanids
- Snakes
- Boidae
- Colubridae
- Lamprophiidae
- Leptotyphlopidae
- Typhlopidae
- Viperidae

***Pristurus minimus***

Arnold, 1977

**S26: Species information**  
Lizards  
Geckos, Sphaerodactylidae

A

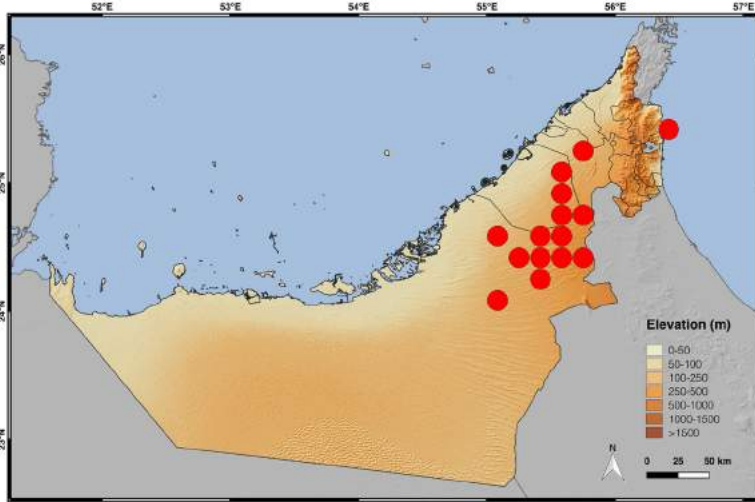

B

Useful information

|               |        |
|---------------|--------|
| IUCN Category | LC/LC  |
| Venomous      | NO     |
| Endemic       | NO     |
| Origin        | Native |

C

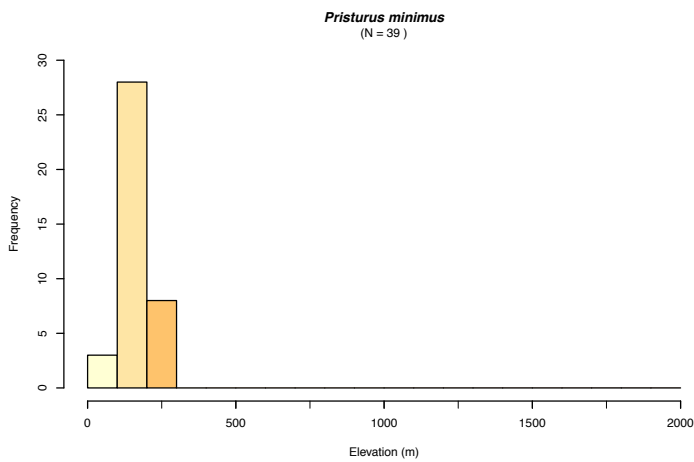

D

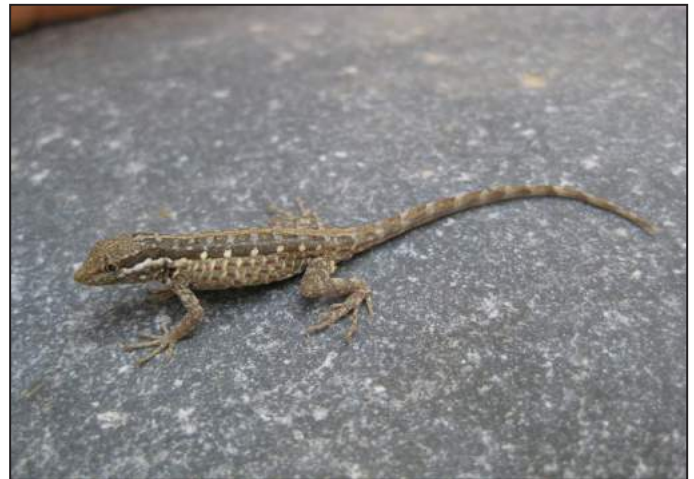

E

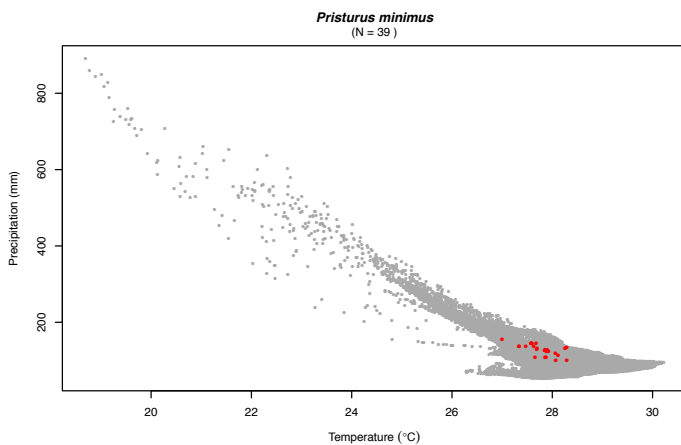

F

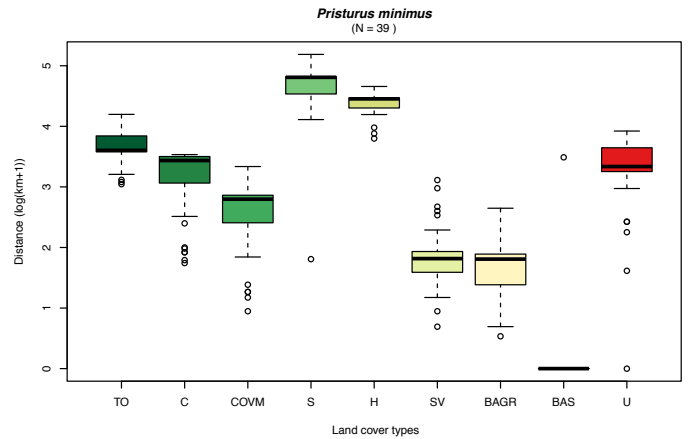

- Lizards
- Agamids
- Geckos
- Lacertids
- Skinks
- Amphisbaenids
- Varamids
- Snakes
- Boidae
- Colubridae
- Lamprophiidae
- Leptotyphlopidae
- Typhlopidae
- Viperidae

**S27: Species information**

Lizards  
Geckos, Sphaerodactylidae

***Pristurus rupestris*-sp. 3**  
**Undescribed**

B

Useful information

|               |        |
|---------------|--------|
| IUCN Category | NE/LC  |
| Venomous      | NO     |
| Endemic       | NO     |
| Origin        | Native |

A

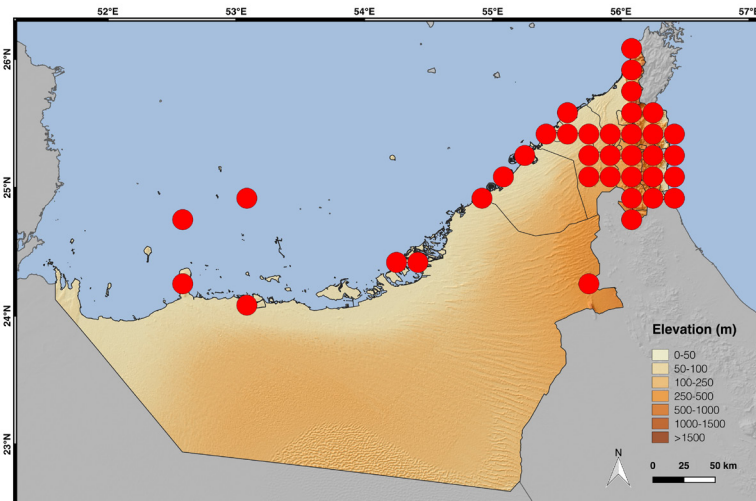

D

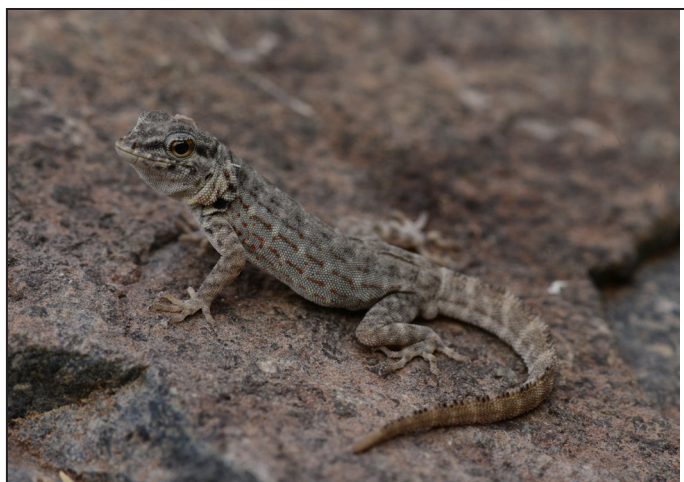

C

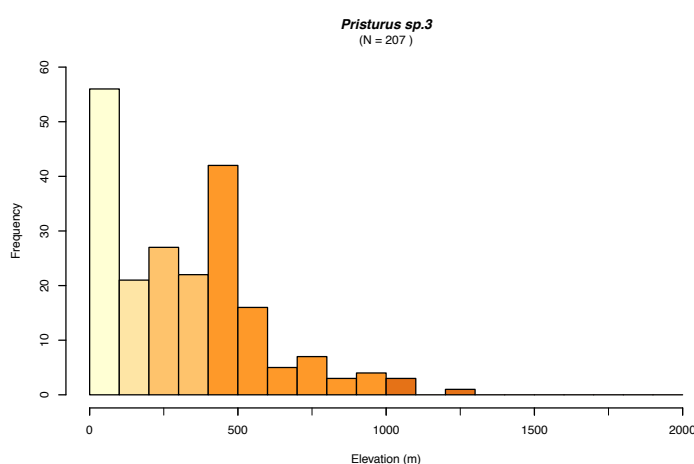

F

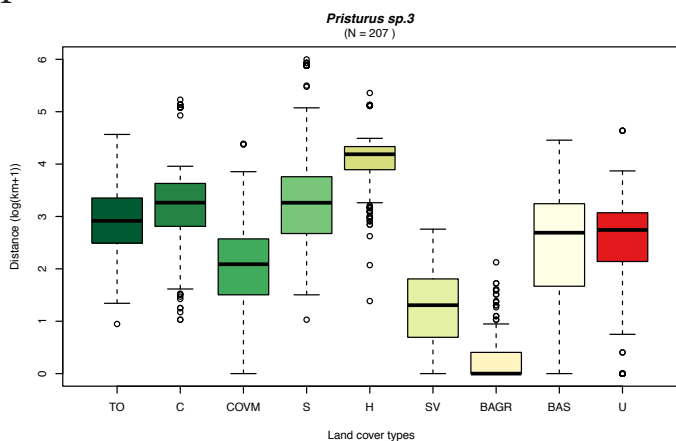

E

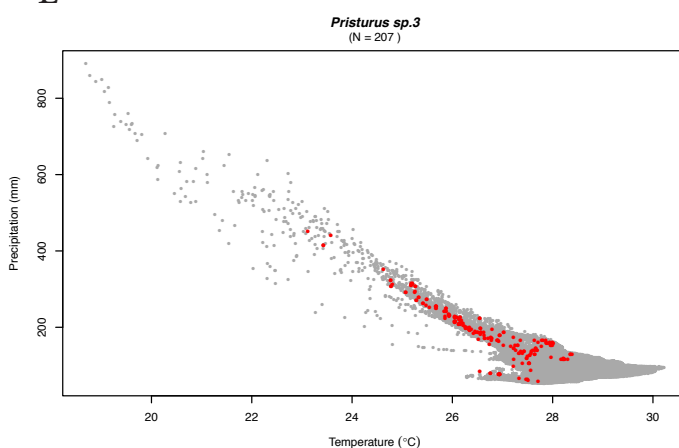

- Lizards
- Agamids
- Geckos
- Lacertids
- Skinkis
- Amphisbaenids
- Varanids
- Snakes
- Boidae
- Colubridae
- Lamprophiidae
- Leptotyphlopidae
- Typhlopidae
- Viperidae

***Teratoscincus keyserlingii***  
**Strauch, 1863**

**S28: Species information**  
 Lizards  
 Geckos, Sphaerodactylidae

- Lizards
- Agamids
- Geckos
- Lacertids
- Skinks
- Ampeliscaenids
- Varamids
- Snakes
- Boidae
- Colubridae
- Lamprophiidae
- Leptotyphlopidae
- Typhlopidae
- Viperidae

A

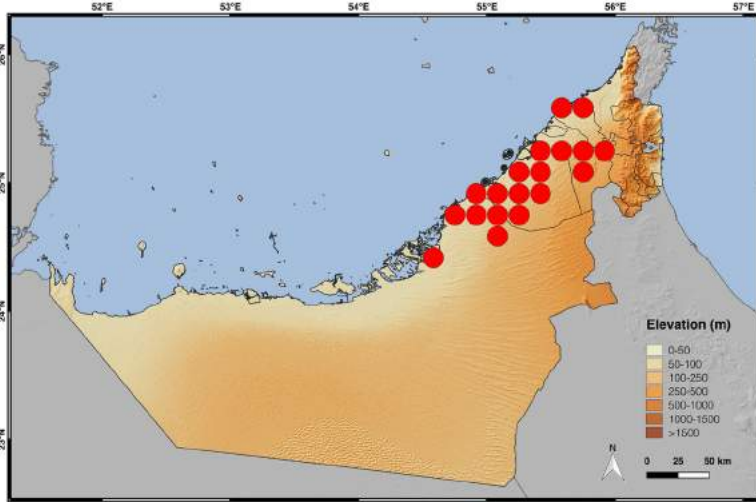

B

Useful information

| IUCN Category | LC/CR  |
|---------------|--------|
| Venomous      | NO     |
| Endemic       | NO     |
| Origin        | Native |

C

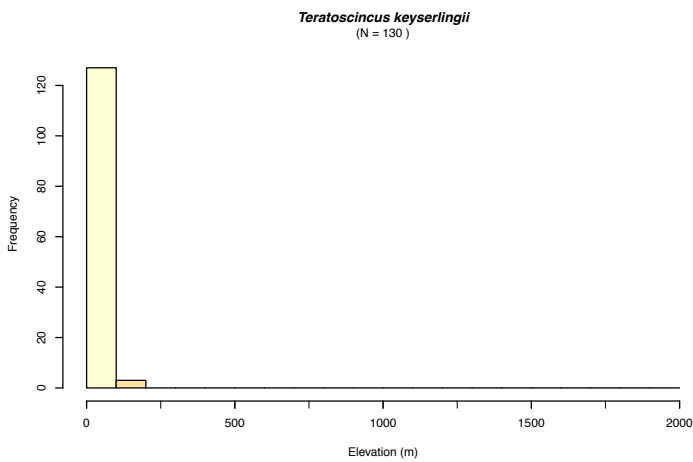

D

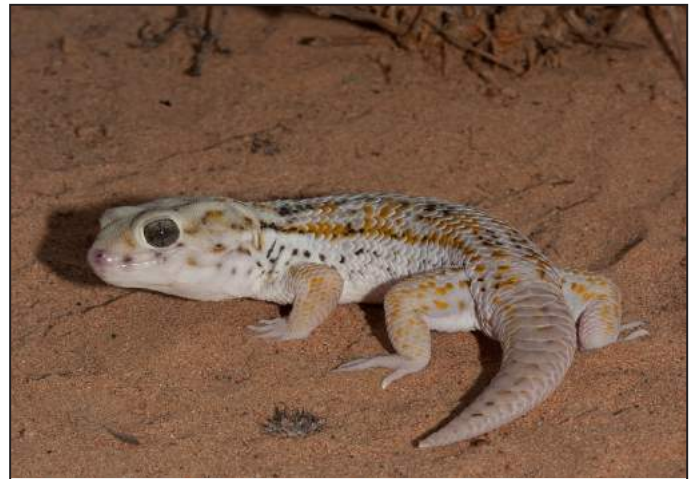

E

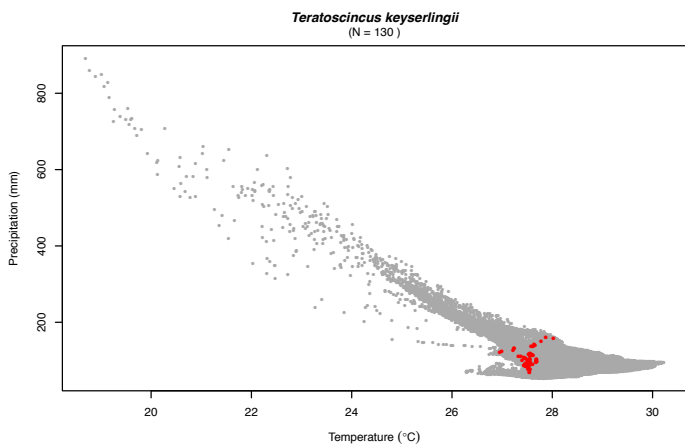

F

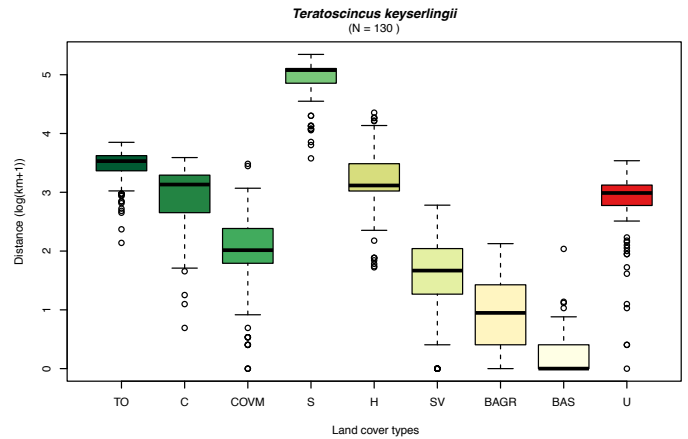

**S29: Species information**

Lizards  
 Lacertids, Lacertidae

*Acanthodactylus blanfordii*  
 Boulenger, 1918

B

Useful information

|               |        |
|---------------|--------|
| IUCN Category | LC/VU  |
| Venomous      | NO     |
| Endemic       | NO     |
| Origin        | Native |

A

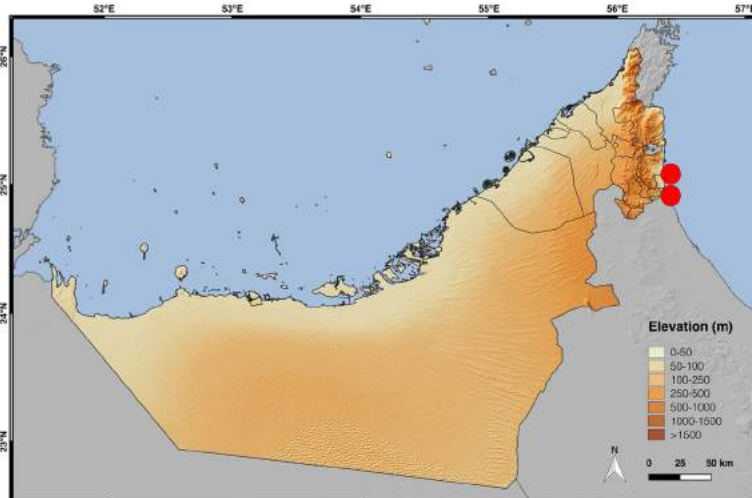

D

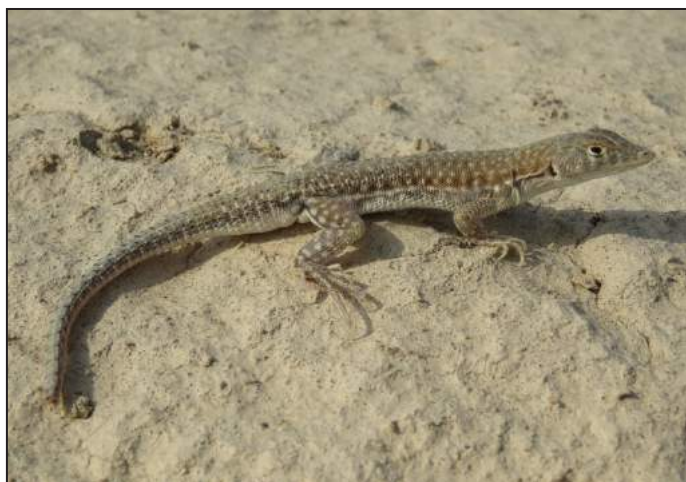

C

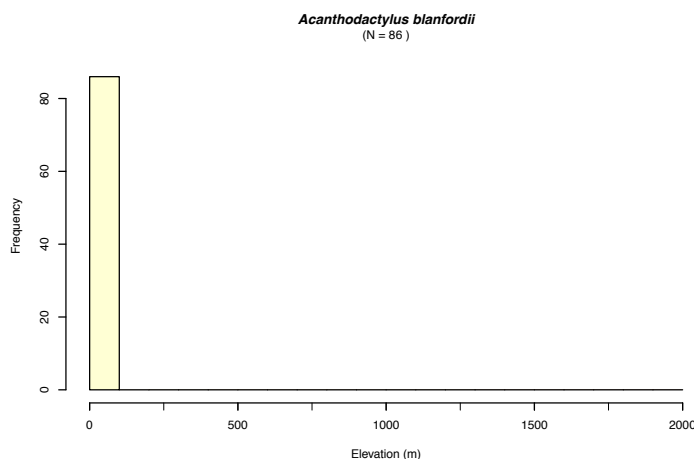

F

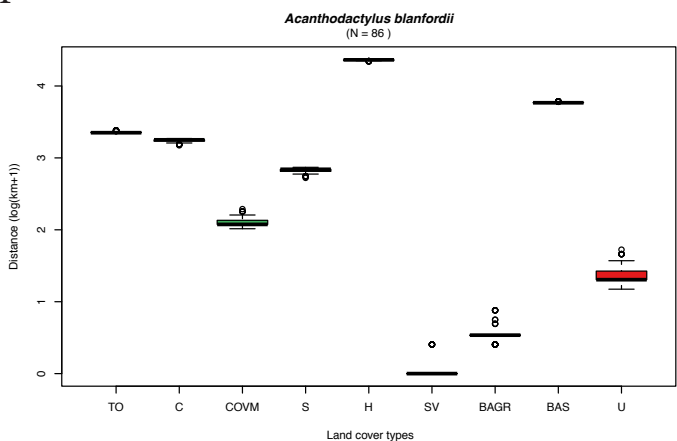

E

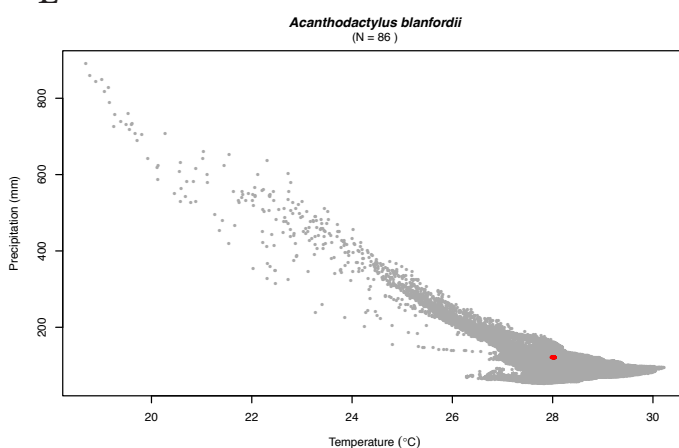

- Lizards
- Agamids
- Geckos
- Lacertids**
- Skinks
- Amphisbaenids
- Varanids
- Snakes
- Boidae
- Colubridae
- Lamproliidae
- Leptotyphlopidae
- Typhlopidae
- Viperidae

***Acanthodactylus boskianus asper***  
(Audouin, 1829)

**S30: Species information**  
Lizards  
Lacertids, Lacertidae

- Lizards
- Agamids
- Gekkos
- Lacertids
- Skinks
- Amphisbaenids
- Varamids
- Snakes
- Boidae
- Colubridae
- Lamprophiidae
- Leptotyphlopidae
- Typhlopidae
- Viperidae

A

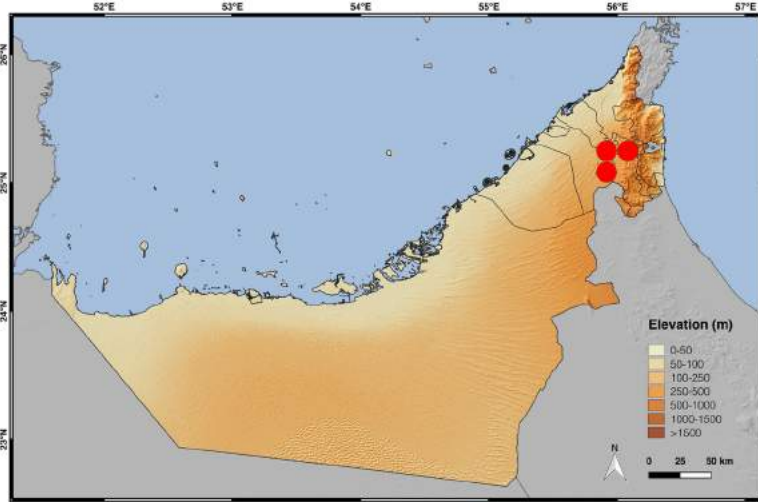

B

Useful information

|               |        |
|---------------|--------|
| IUCN Category | LC/NT  |
| Venomous      | NO     |
| Endemic       | NO     |
| Origin        | Native |

C

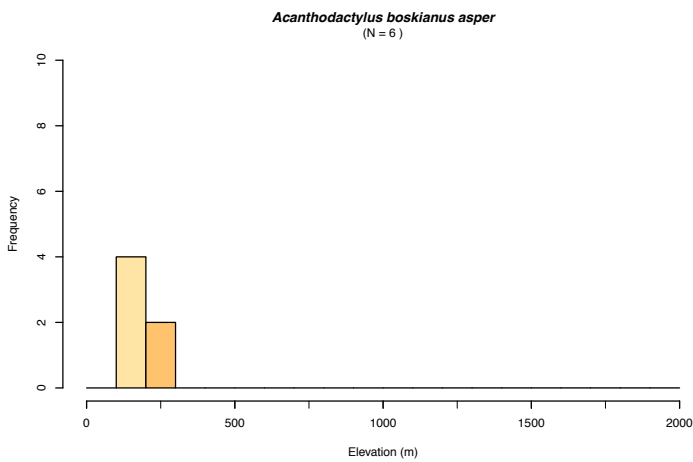

D

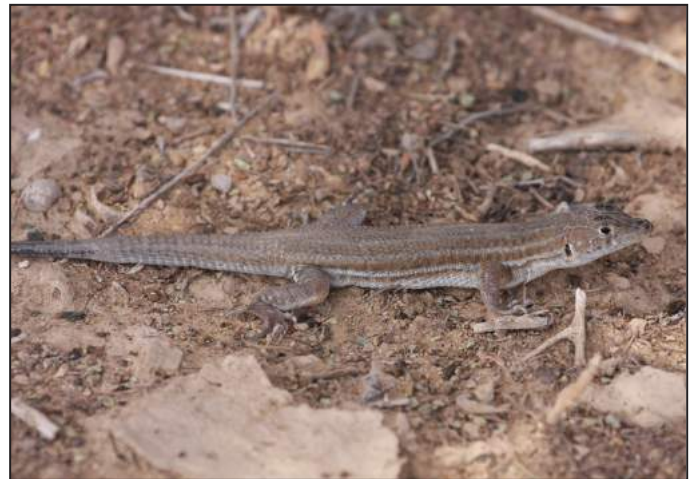

E

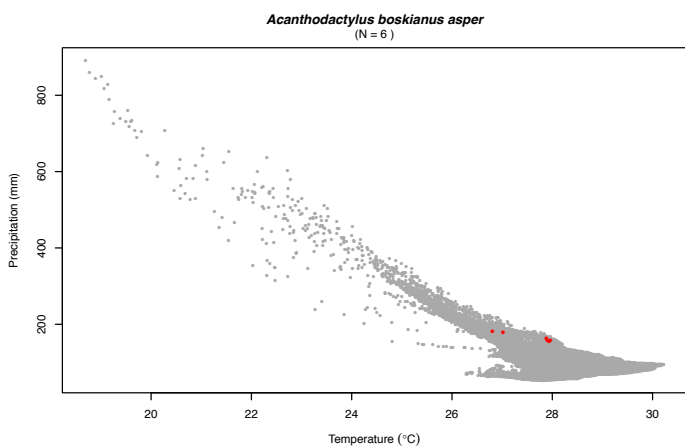

F

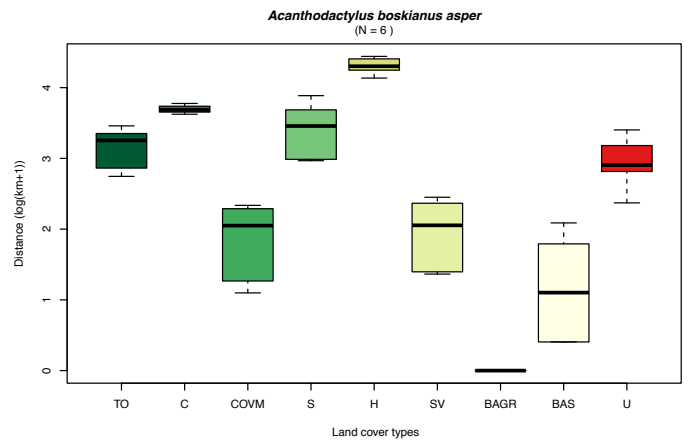

**S31: Species information**

Lizards  
 Lacertids, Lacertidae

*Acanthodactylus gongrorhynchatus*  
 Leviton & Anderson, 1967

- Lizards
- Agamids
- Geckos
- Lacertids
- Skinks
- Amphisbaenids
- Varanids
- Snakes
- Boidae
- Colubridae
- Lamproliidae
- Leptotyphlopidae
- Typhlopidae
- Viperidae

B

Useful information

|               |        |
|---------------|--------|
| IUCN Category | DD/LC  |
| Venomous      | NO     |
| Endemic       | NO     |
| Origin        | Native |

A

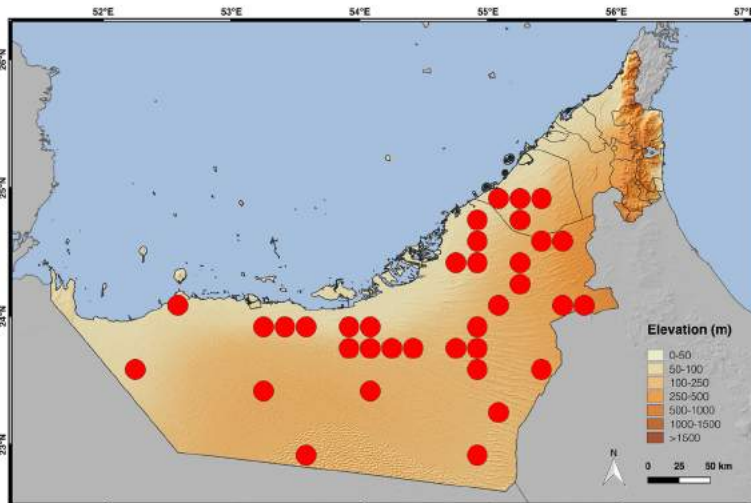

D

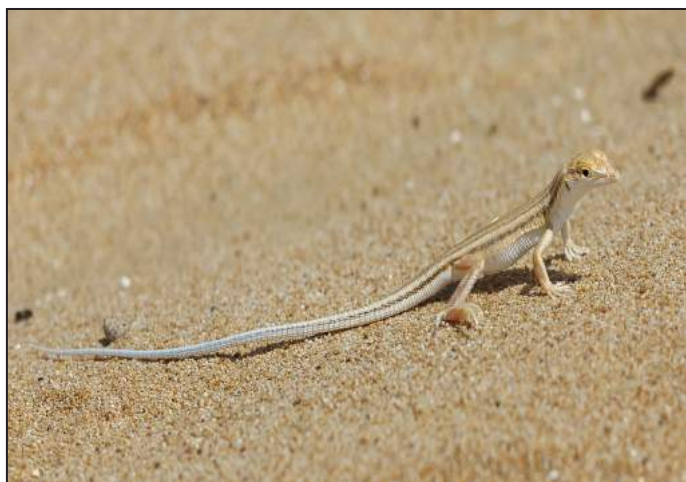

C

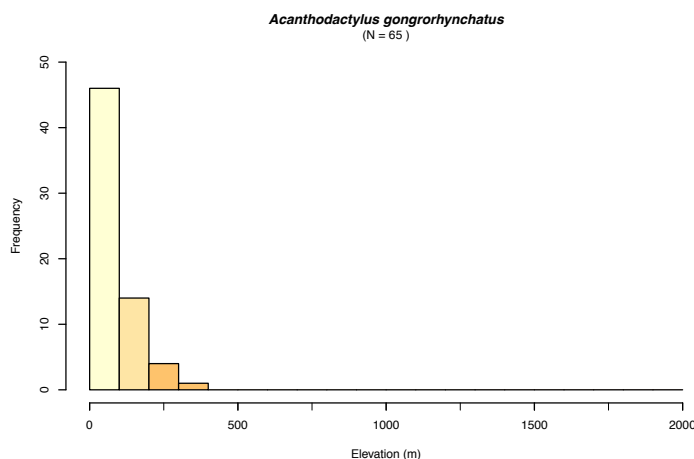

F

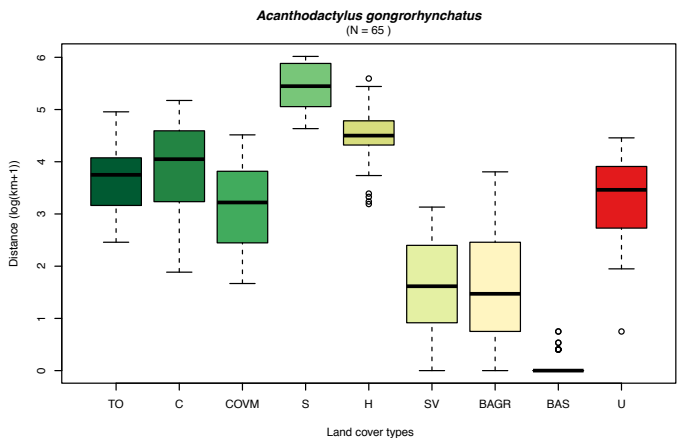

E

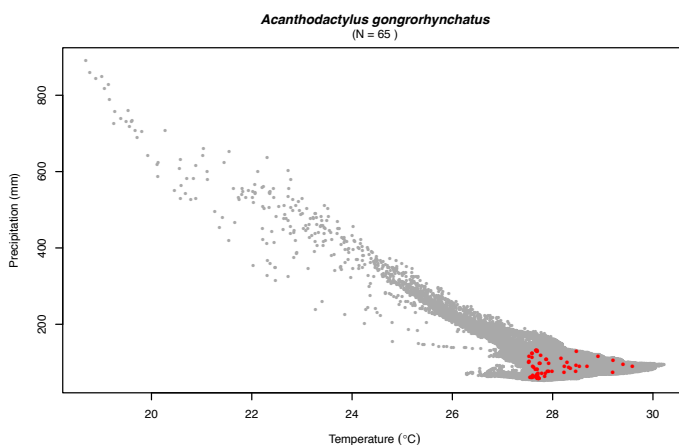



***Acanthodactylus haasi***  
**Leviton & Anderson, 1967**

**S32: Species information**  
 Lizards  
 Lacertids, Lacertidae

- Lizards
- Agamids
- Gekkos
- Lacertids
- Skinks
- Amphisbaenids
- Varamids
- Snakes
- Boidae
- Colubridae
- Lamprophiidae
- Leptotyphlopidae
- Typhlopidae
- Viperidae

A

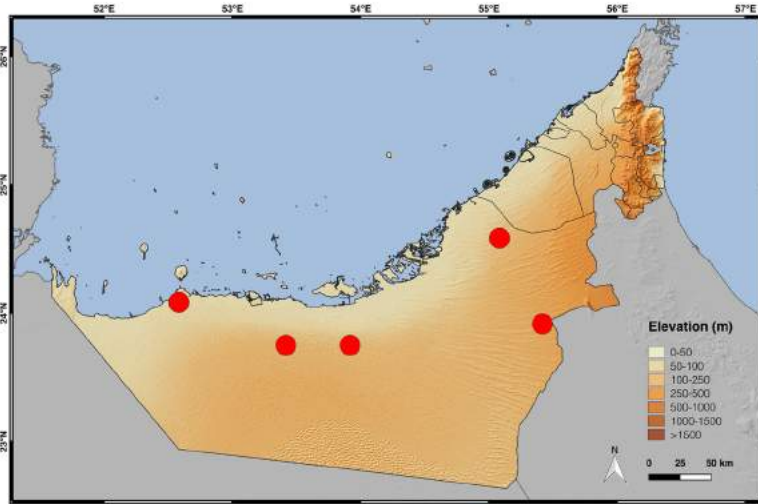

B

Useful information

|               |        |
|---------------|--------|
| IUCN Category | LC/DD  |
| Venomous      | NO     |
| Endemic       | NO     |
| Origin        | Native |

C

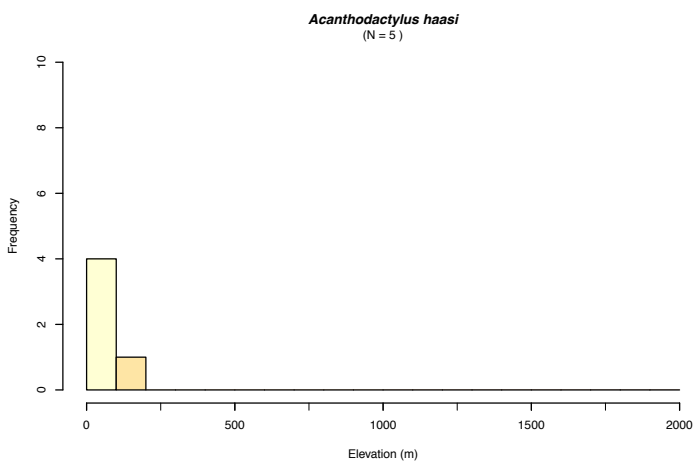

D

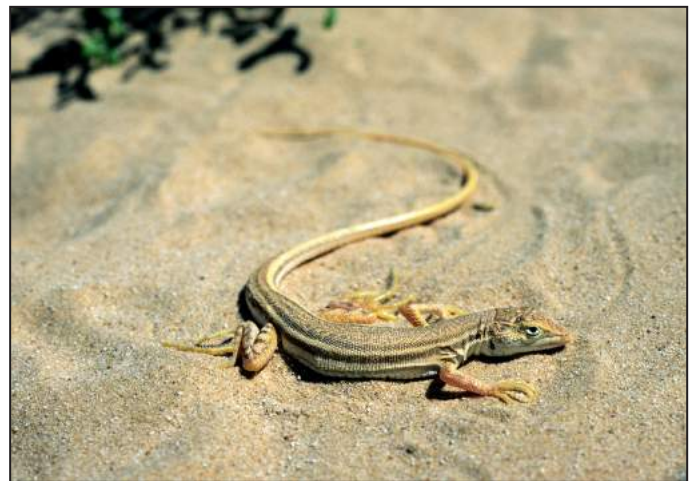

E

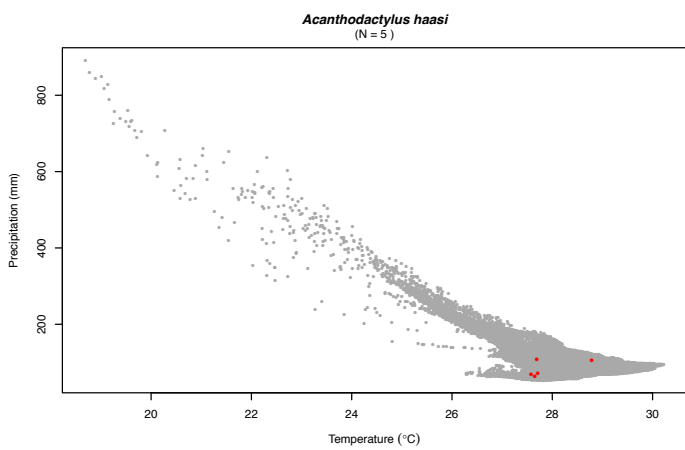

F

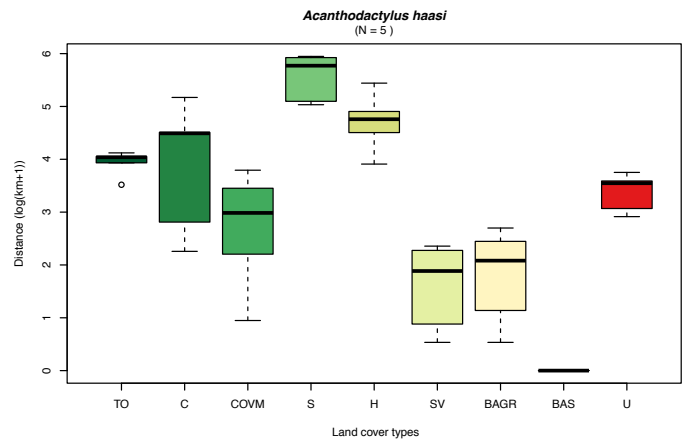

**S33: Species information**

Lizards  
 Lacertids, Lacertidae

*Acanthodactylus opeodurus*  
 Arnold, 1980

B

Useful information

|               |        |
|---------------|--------|
| IUCN Category | LC/DD  |
| Venomous      | NO     |
| Endemic       | NO     |
| Origin        | Native |

A

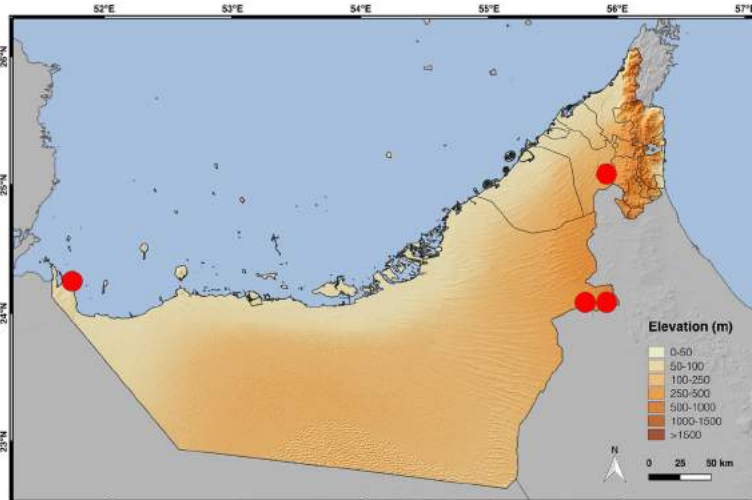

D

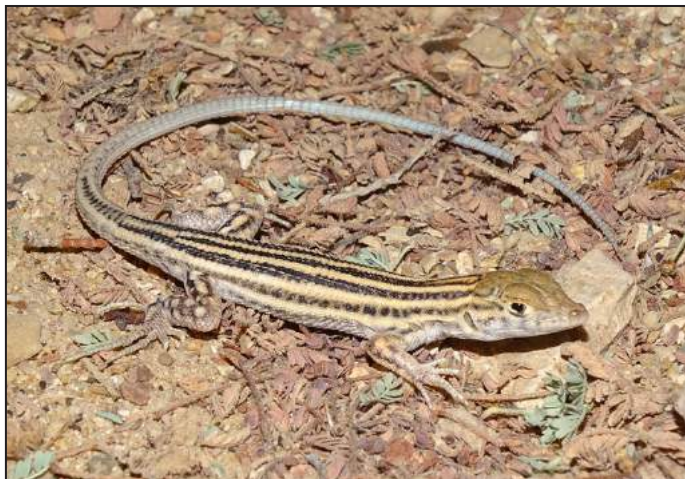

C

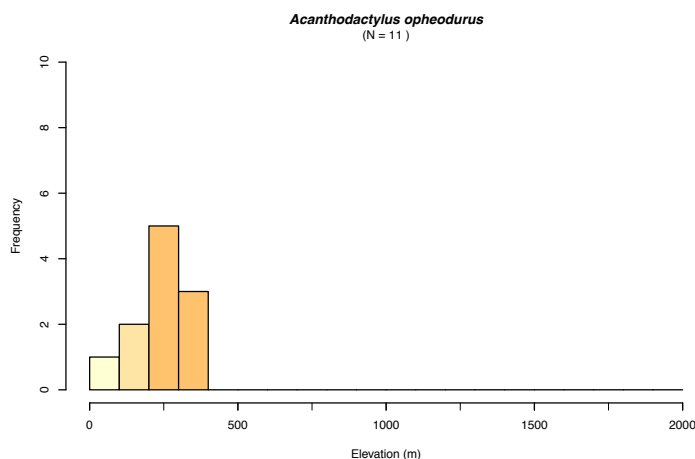

F

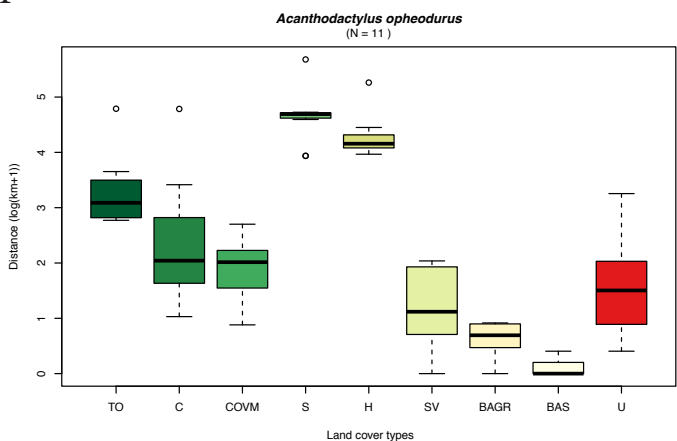

E

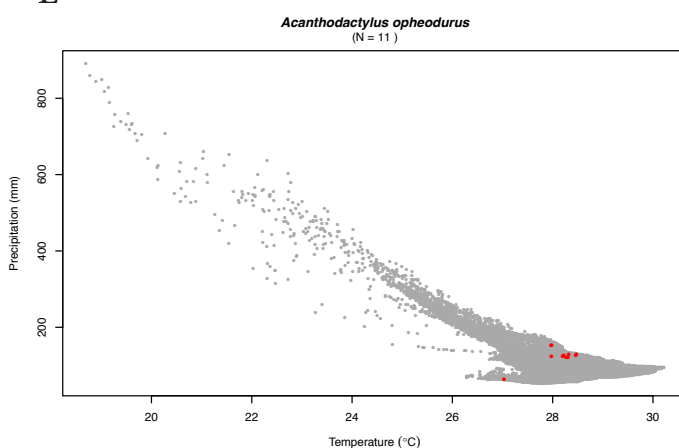

Lizards

Agamids

Geckos

Lacertids

Skinks

Amphisbaenids

Varanids

Snakes

Boidae

Colubridae

Lamproliidae

Leptotyphlopidae

Typhlopidae

Viperidae

***Acanthodactylus schmidti***  
 Haas, 1957

**S34: Species information**  
 Lizards  
 Lacertids, Lacertidae

- Lizards
- Agamids
- Gekkos
- Lacertids
- Skinks
- Amphisbaenids
- Varamids
- Snakes
- Boidae
- Colubridae
- Lamprophiidae
- Leptotyphlopidae
- Typhlopidae
- Viperidae

A

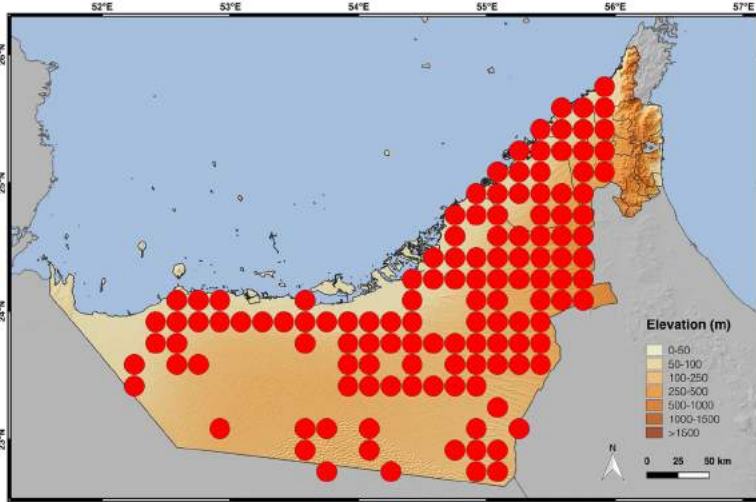

B

Useful information

|               |        |
|---------------|--------|
| IUCN Category | LC/LC  |
| Venomous      | NO     |
| Endemic       | NO     |
| Origin        | Native |

C

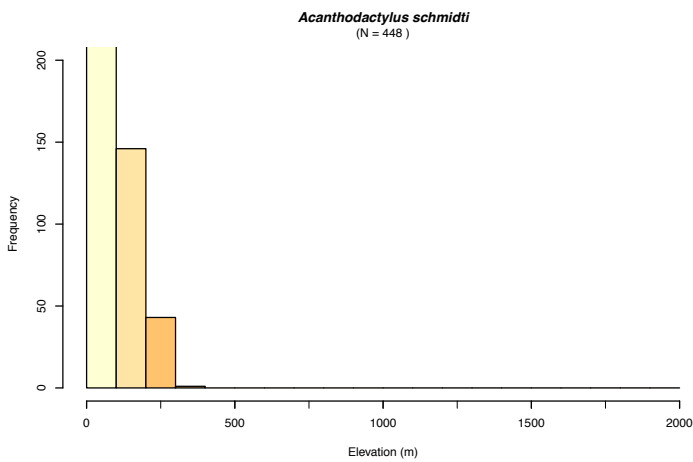

D

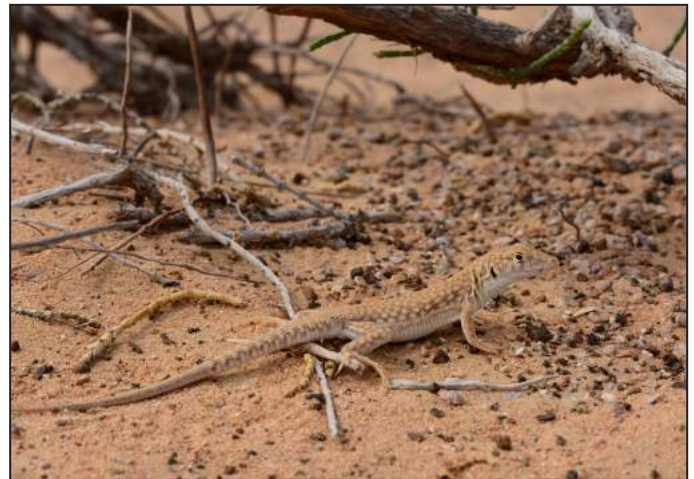

E

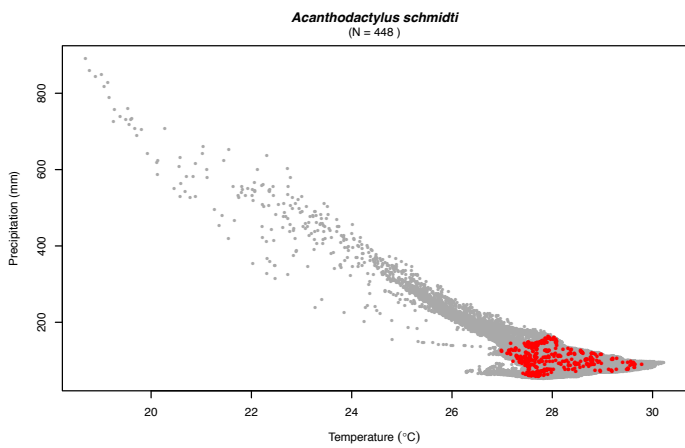

F

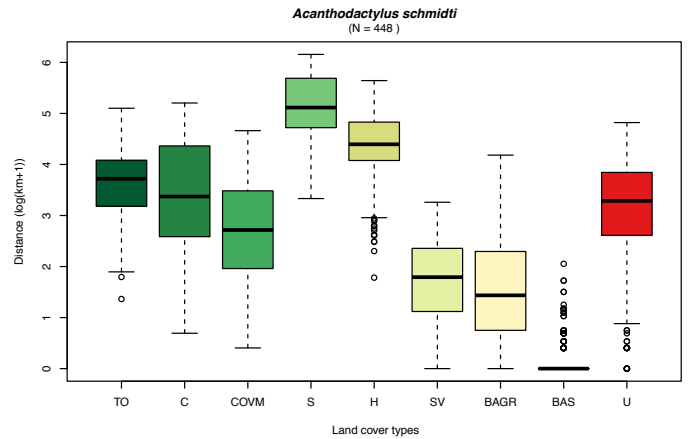

**S35: Species information**

Lizards  
 Lacertids, Lacertidae

*Mesalina adramitana*  
 (Boulenger, 1917)

B

Useful information

|               |        |
|---------------|--------|
| IUCN Category | LC/LC  |
| Venomous      | NO     |
| Endemic       | NO     |
| Origin        | Native |

A

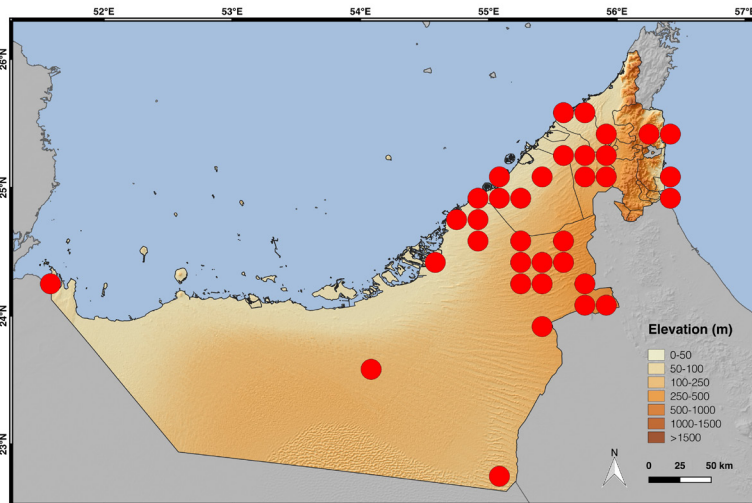

D

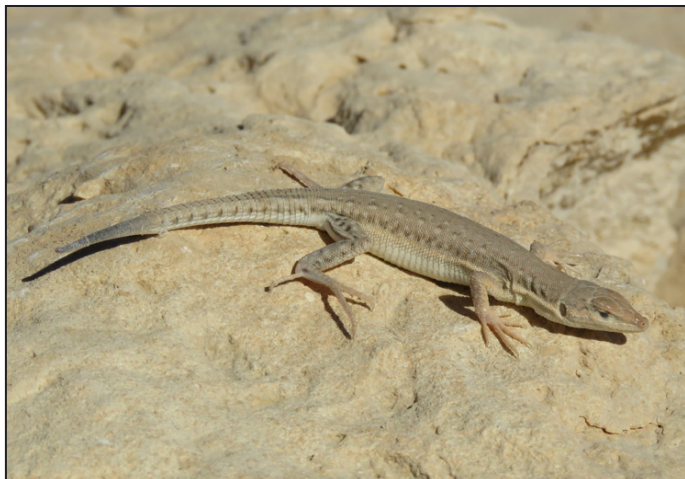

C

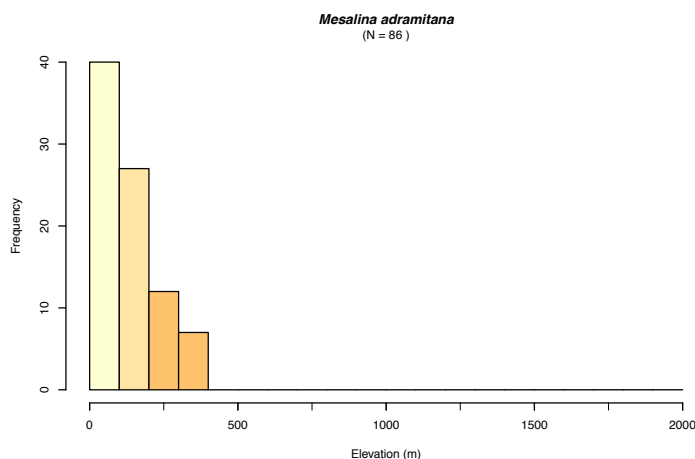

F

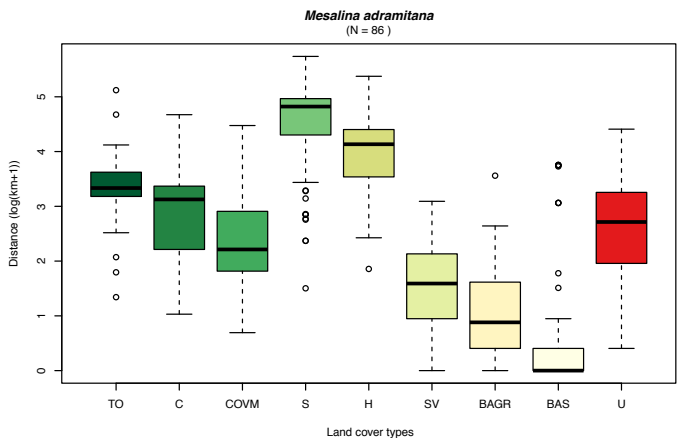

E

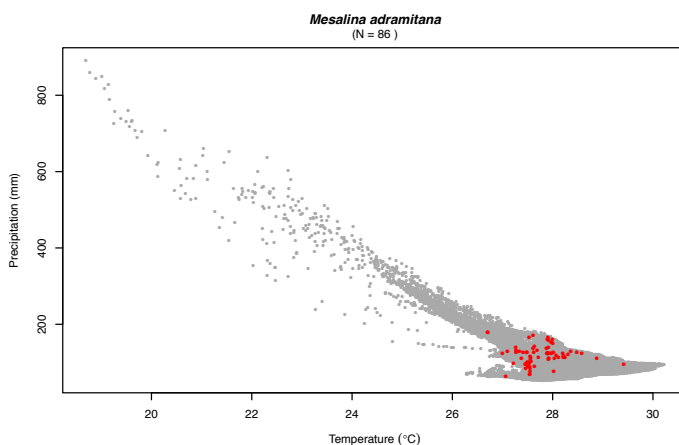

Lizards

Agamids

Geckos

Lacertids

Skinks

Amphisbaenids

Varanids

Snakes

Boidae

Colubridae

Lamproliidae

Leptotyphlopidae

Typhlopidae

Viperidae

*Mesalina brevirostris*

Blanford, 1874

S36: Species information

Lizards

Lacertids, Lacertidae

- Lizards
- Agamids
- Gekkos
- Lacertids
- Skinks
- Amphisbaenids
- Varamids
- Snakes
- Boidae
- Colubridae
- Lamprophiidae
- Leptotyphlopidae
- Typhlopidae
- Viperidae

A

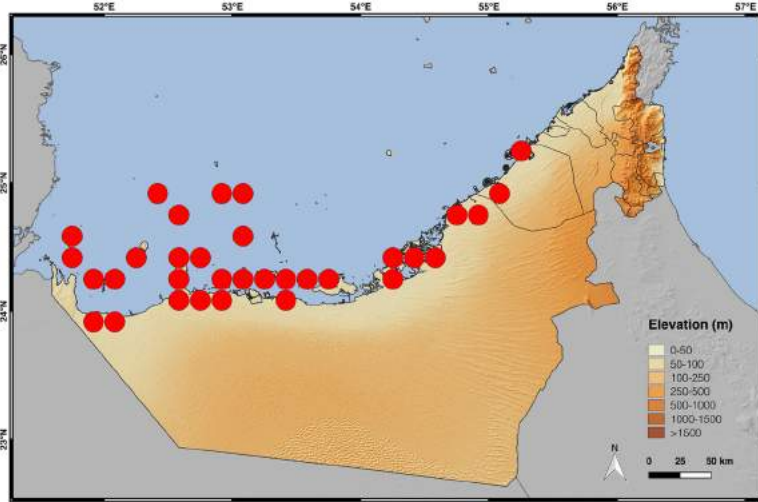

B

Useful information

|               |        |
|---------------|--------|
| IUCN Category | LC/LC  |
| Venomous      | NO     |
| Endemic       | NO     |
| Origin        | Native |

C

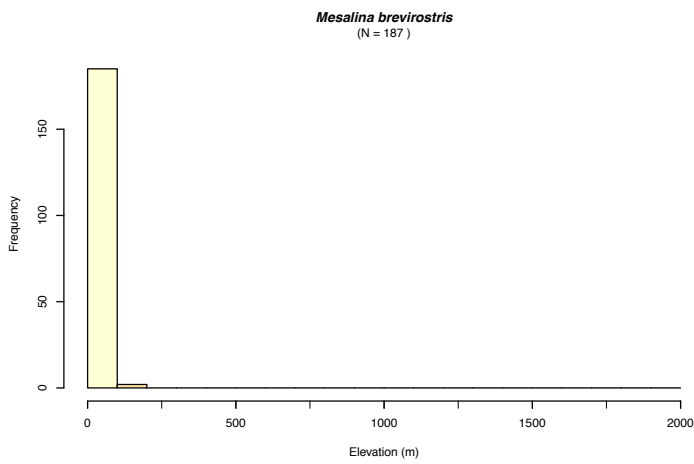

D

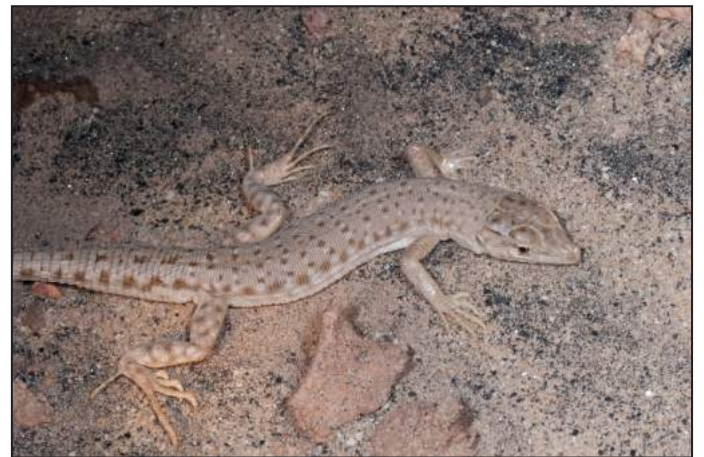

E

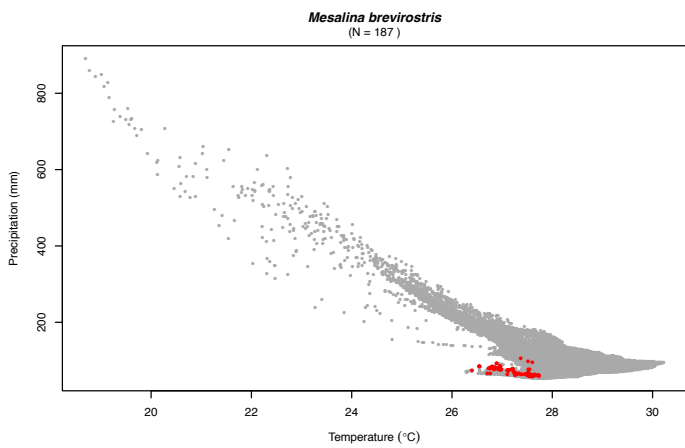

F

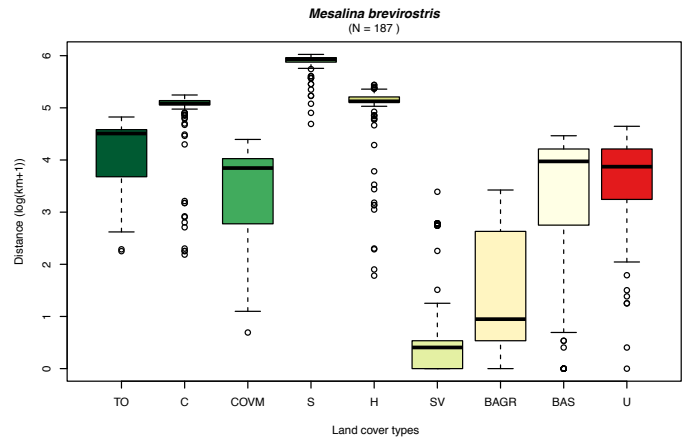

**S37: Species information**

Lizards  
 Lacertids, Lacertidae

*Omanosaura cyanura*  
 (Arnold, 1972)

B

Useful information

|               |        |
|---------------|--------|
| IUCN Category | LC/LC  |
| Venomous      | NO     |
| Endemic       | NO     |
| Origin        | Native |

A

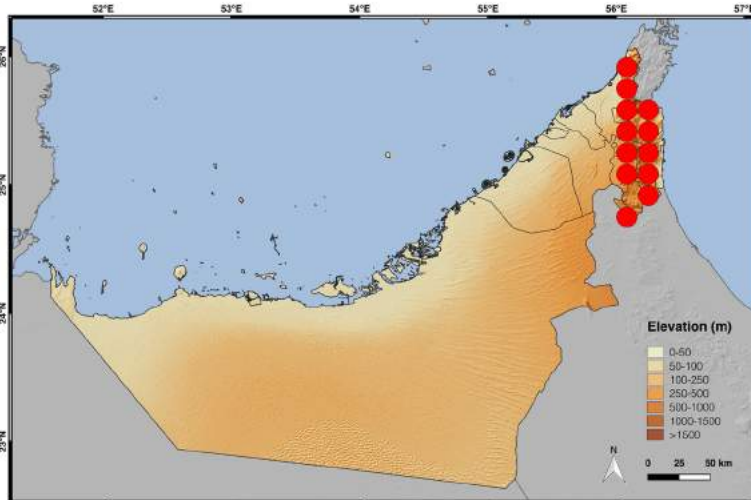

D

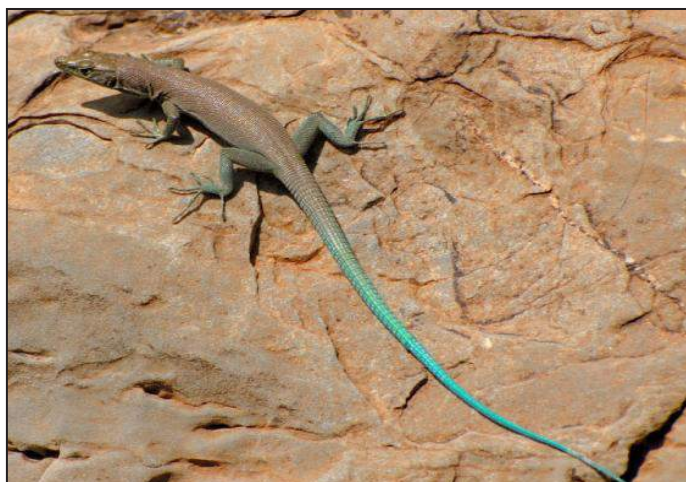

C

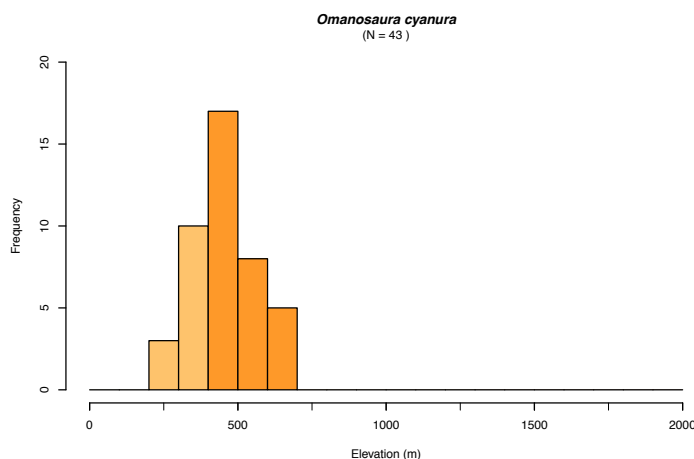

F

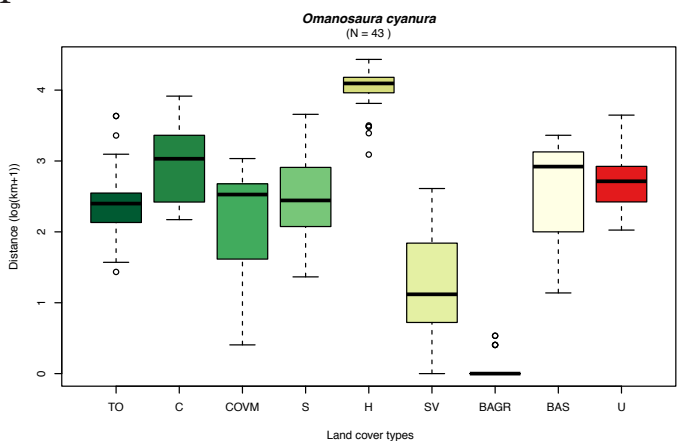

E

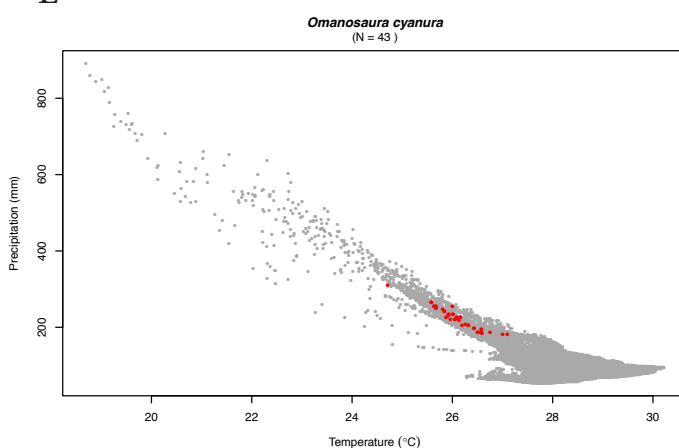

- Lizards
- Agamids
- Geckos
- Lacertids
- Skinks
- Amphisbaenids
- Varanids
- Snakes
- Boidae
- Colubridae
- Lamproliidae
- Leptotyphlopidae
- Typhlopidae
- Viperidae

***Omanosaura jayakari***  
(Boulenger, 1887)

**S38: Species information**  
Lizards  
Lacertids, Lacertidae

- Lizards
- Agamids
- Gekkos
- Lacertids
- Skinks
- Amphisbaenids
- Varamids
- Snakes
- Boidae
- Colubridae
- Lamprophiidae
- Leptotyphlopoidea
- Typhlopoidea
- Viperidae

A

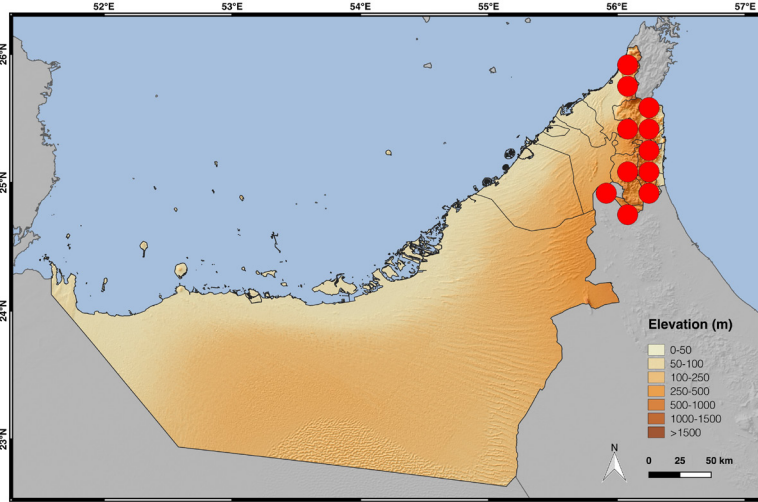

B

Useful information

|               |        |
|---------------|--------|
| IUCN Category | LC/LC  |
| Venomous      | NO     |
| Endemic       | NO     |
| Origin        | Native |

C

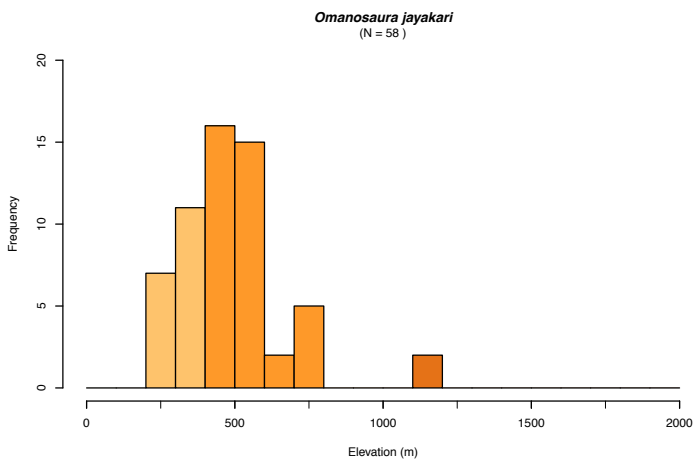

D

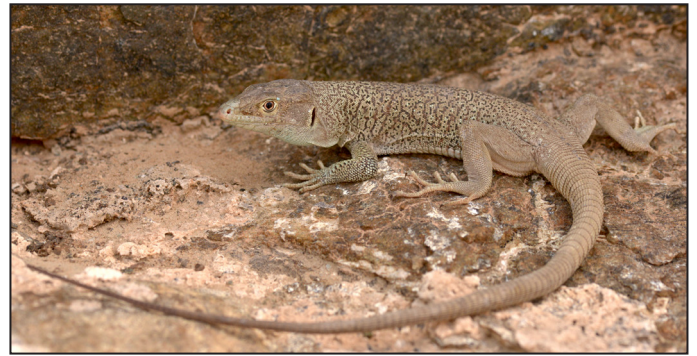

E

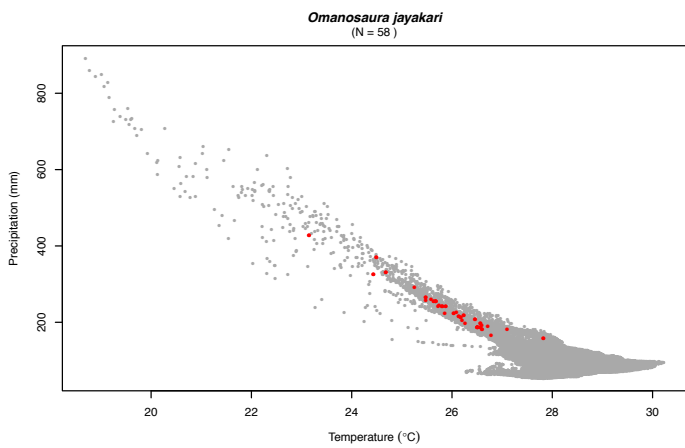

F

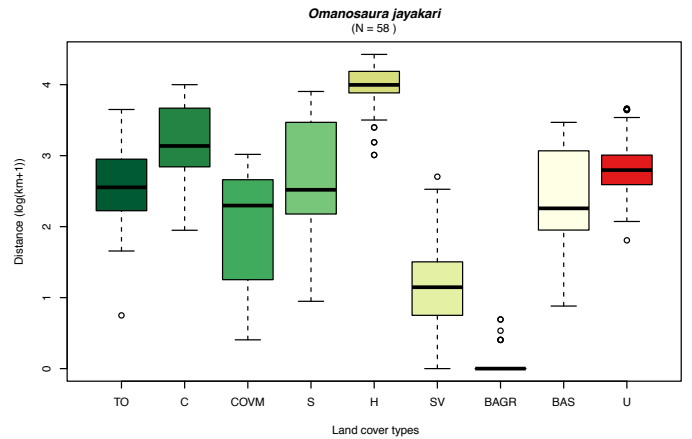

**S39: Species information**

Lizards  
Skinks, Scincidae

***Ablepharus pannonicus***  
(Fitzinger, 1824)

- Lizards
- Agamids
- Geckos
- Lacertids
- Skinks
- Amphisbaenids
- Varanids
- Snakes
- Boidae
- Colubridae
- Lamprophiidae
- Leptotyphlopidae
- Typhlopidae
- Viperidae

B

Useful information

|               |        |
|---------------|--------|
| IUCN Category | LC/LC  |
| Venomous      | NO     |
| Endemic       | NO     |
| Origin        | Native |

A

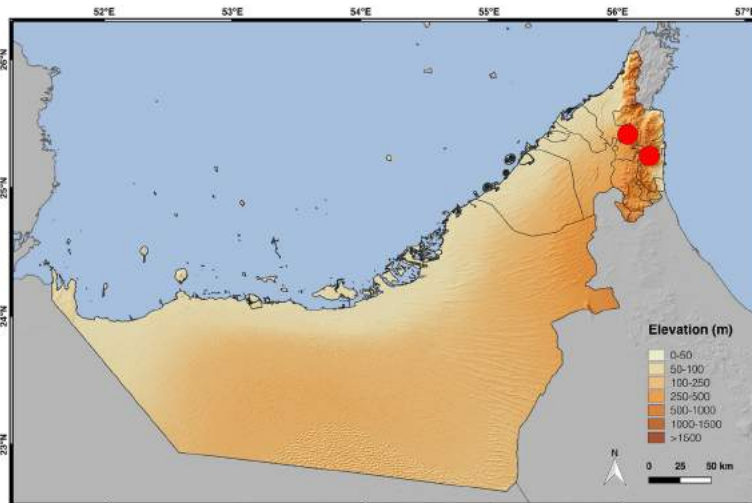

D

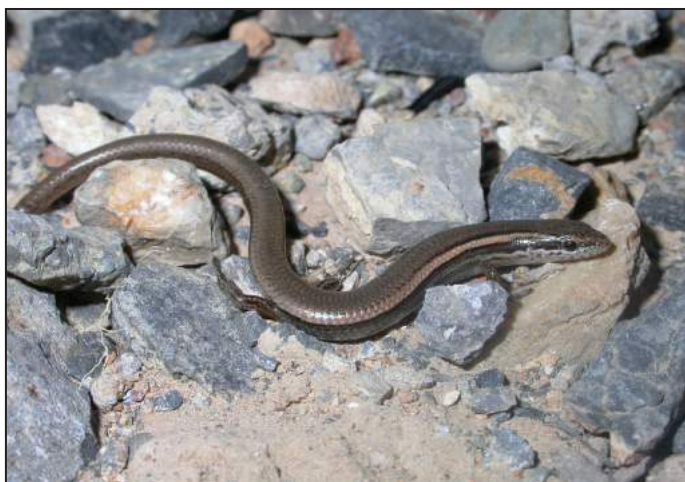

C

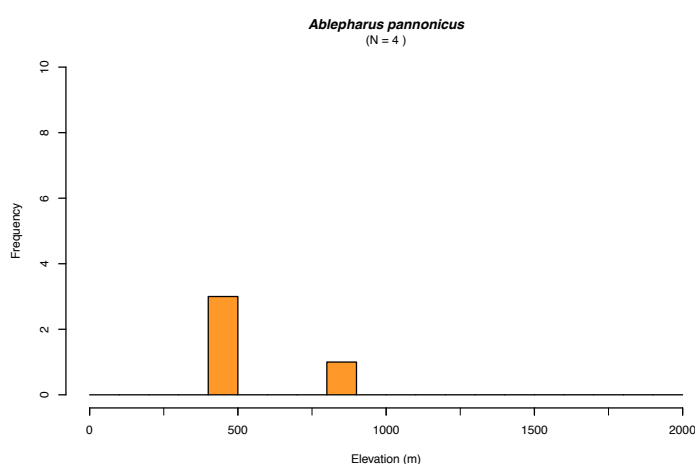

F

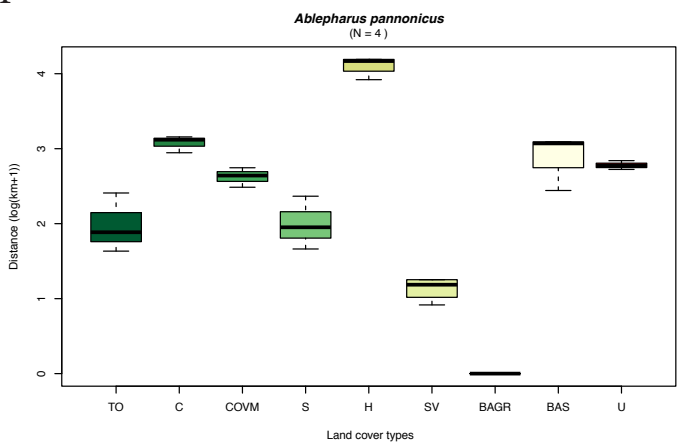

E

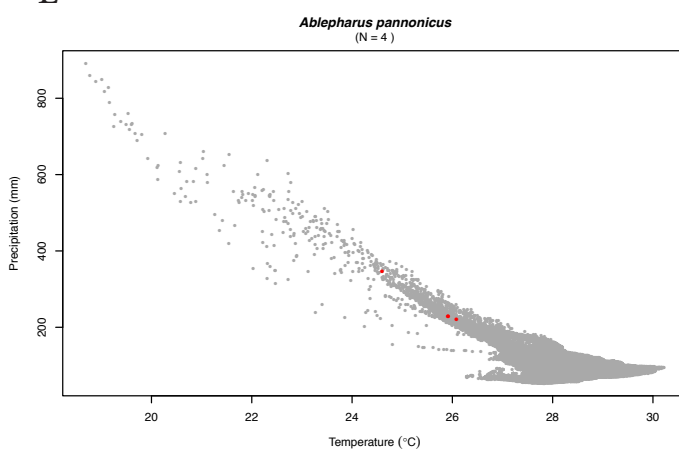



***Chalcides ocellatus ocellatus***  
(Forskål, 1775)

**S40: Species information**  
Lizards  
Skinks, Scincidae

- Lizards
- Agamids
- Gekkos
- Lacertids
- Skinks
- Amphisbaenids
- Varamids
- Snakes
- Boidae
- Colubridae
- Lamprophiidae
- Leptotyphlopidae
- Typhlopidae
- Viperidae

A

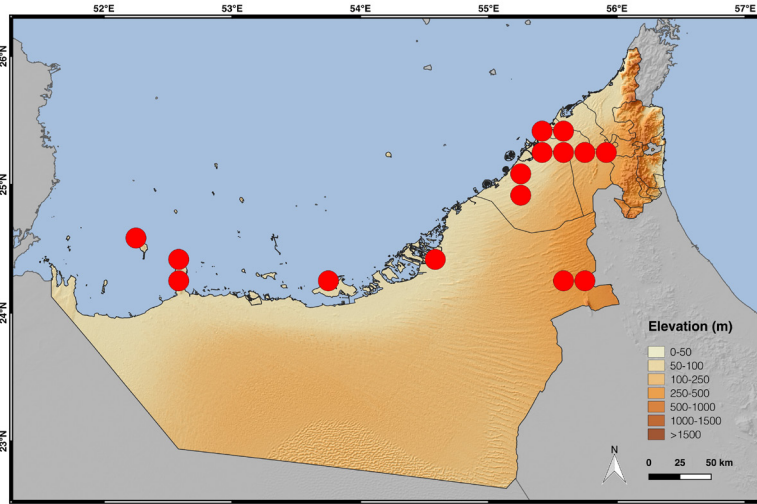

B

Useful information

|               |            |
|---------------|------------|
| IUCN Category | LC/NA      |
| Venomous      | NO         |
| Endemic       | NO         |
| Origin        | Introduced |

C

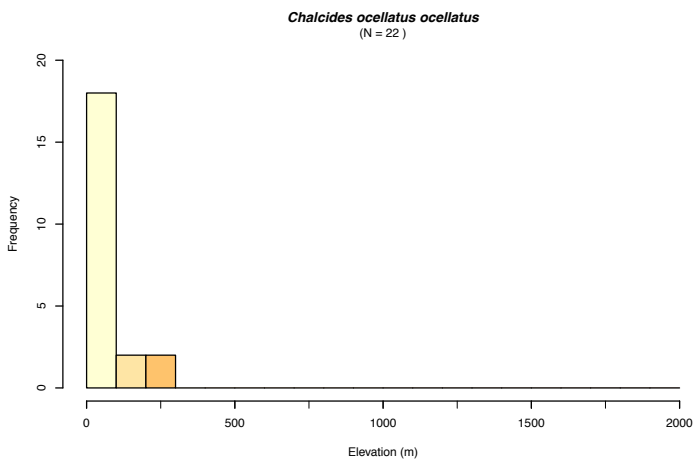

D

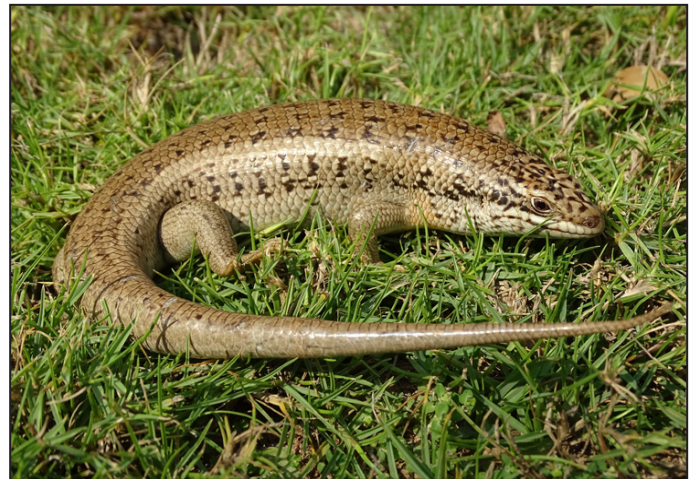

E

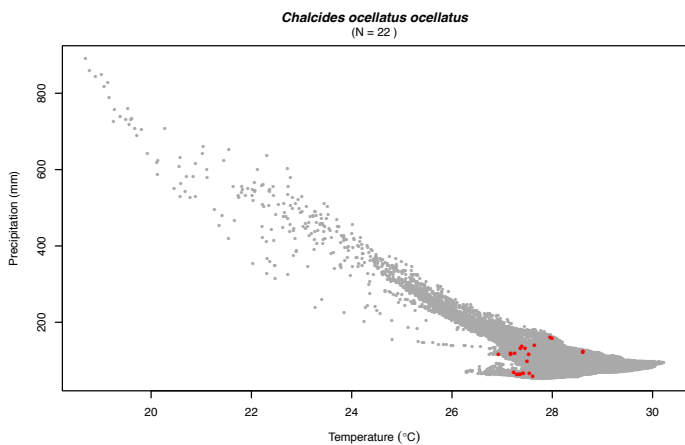

F

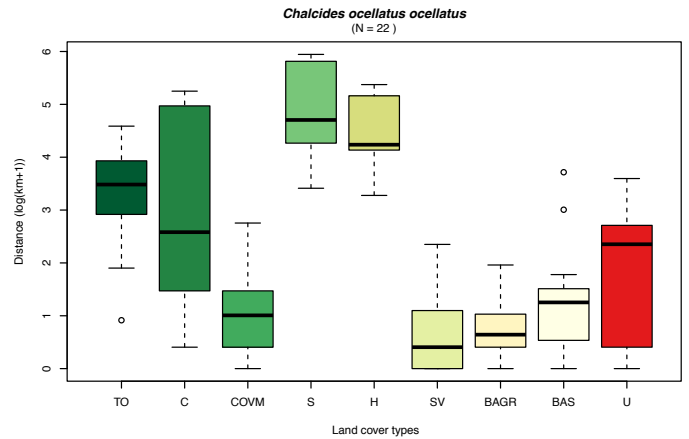

**S41: Species information**

Lizards  
Skinks, Scincidae

*Heremites septemtaeniatus*  
(Reuss, 1834)

B

Useful information

|               |        |
|---------------|--------|
| IUCN Category | LC/DD  |
| Venomous      | NO     |
| Endemic       | NO     |
| Origin        | Native |

A

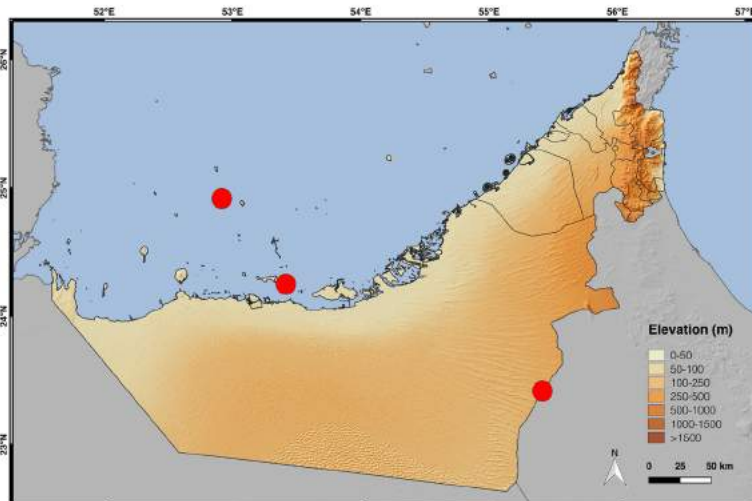

D

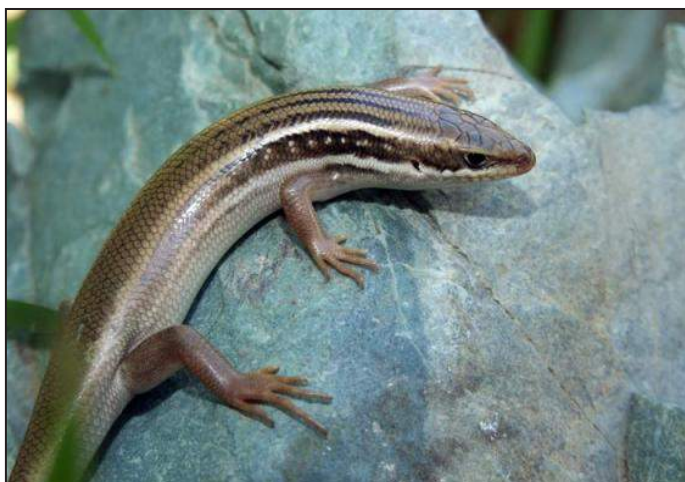

C

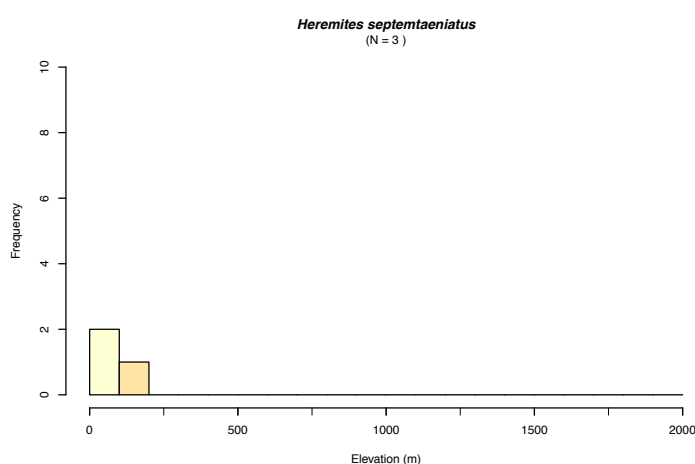

F

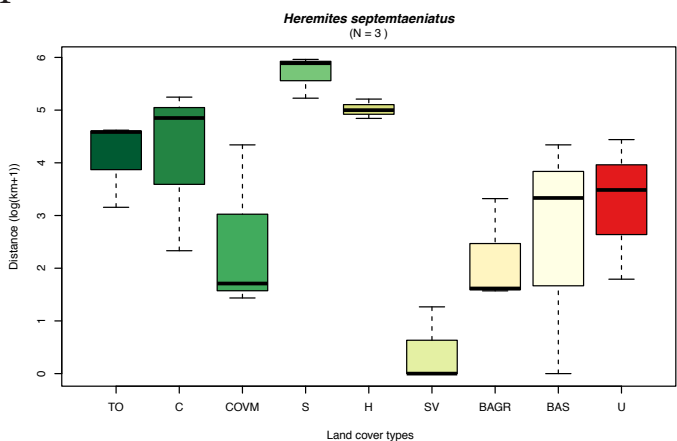

E

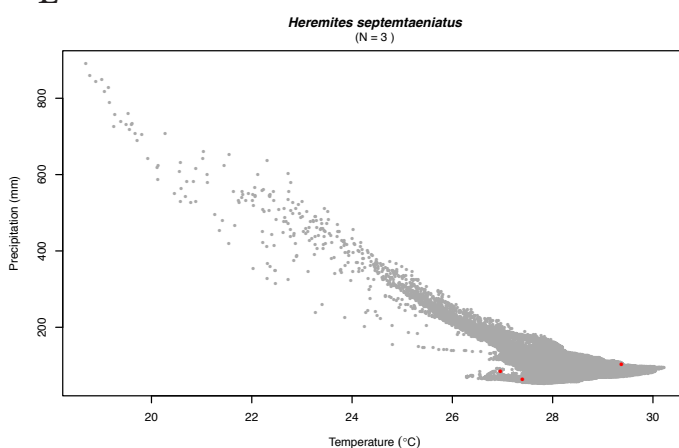

***Scincus mitranus***  
Anderson, 1871

**S42: Species information**  
Lizards  
Skinks, Scincidae

A

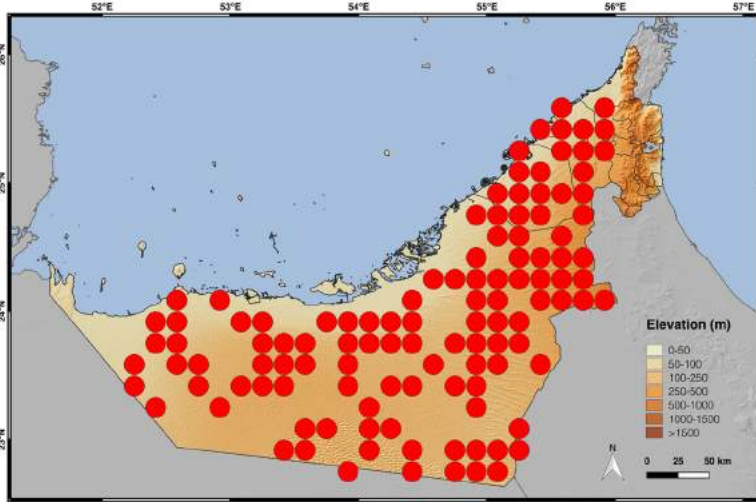

B

Useful information

|               |        |
|---------------|--------|
| IUCN Category | LC/LC  |
| Venomous      | NO     |
| Endemic       | NO     |
| Origin        | Native |

C

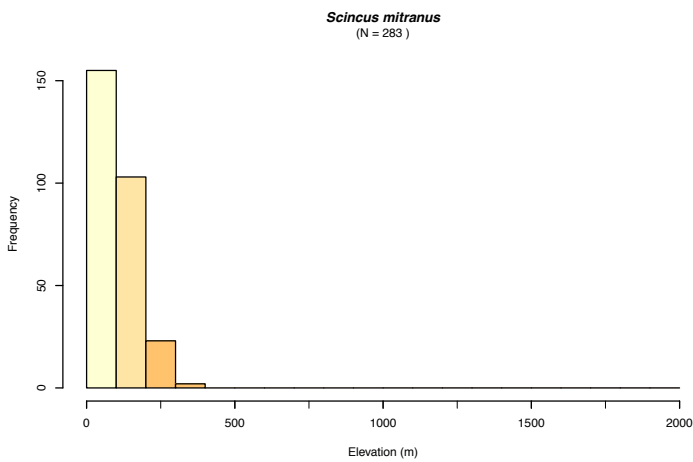

D

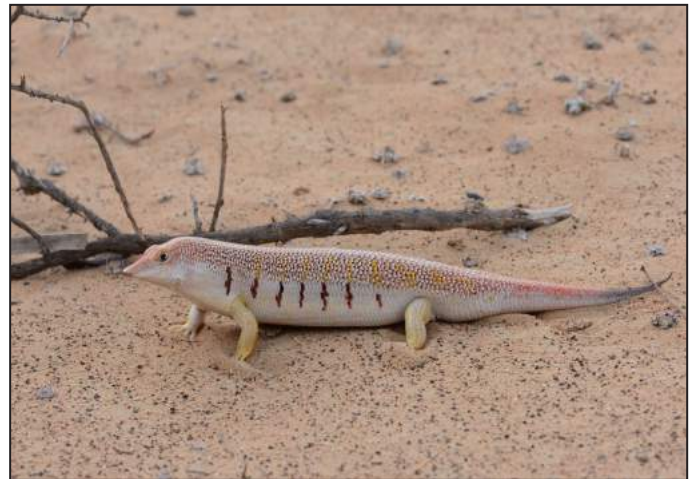

E

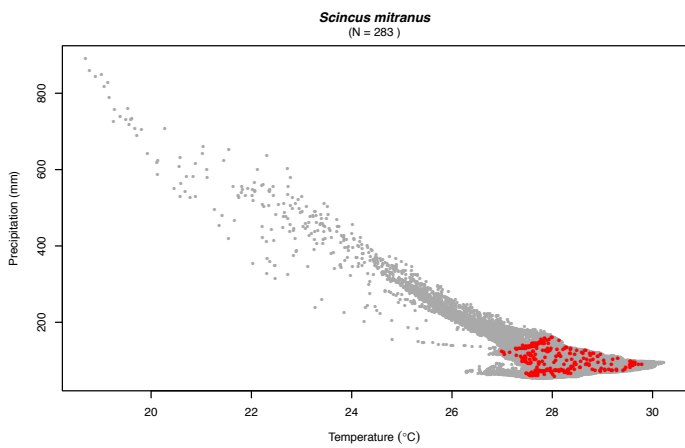

F

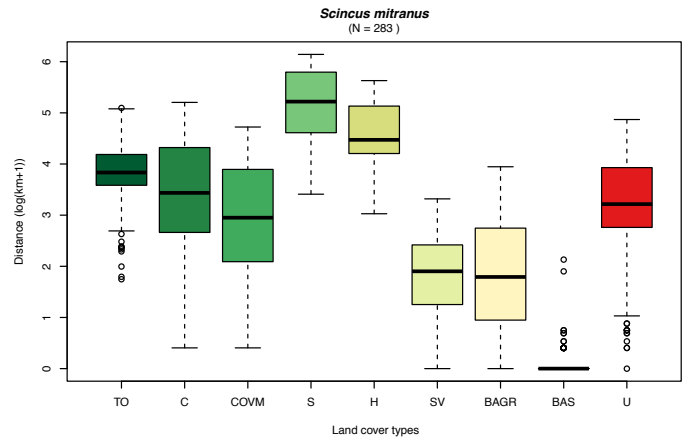

- Lizards
- Agamids
- Gekkos
- Lacertids
- Skinks
- Amphisbaenids
- Varamids
- Snakes
- Boidae
- Colubridae
- Lamprophiidae
- Leptotyphlopidae
- Typhlopidae
- Viperidae

**S43: Species information**

Lizards  
Skinks, Scincidae

*Scincus scincus conirostris*  
Blanford, 1881

- Lizards
- Agamids
- Geckos
- Lacertids
- Skinks
- Amphisbaenids
- Varanids
- Snakes
- Boidae
- Colubridae
- Lamprophiidae
- Leptotyphlopidae
- Typhlopidae
- Viperidae

B

Useful information

|               |        |
|---------------|--------|
| IUCN Category | LC/DD  |
| Venomous      | NO     |
| Endemic       | NO     |
| Origin        | Native |

A

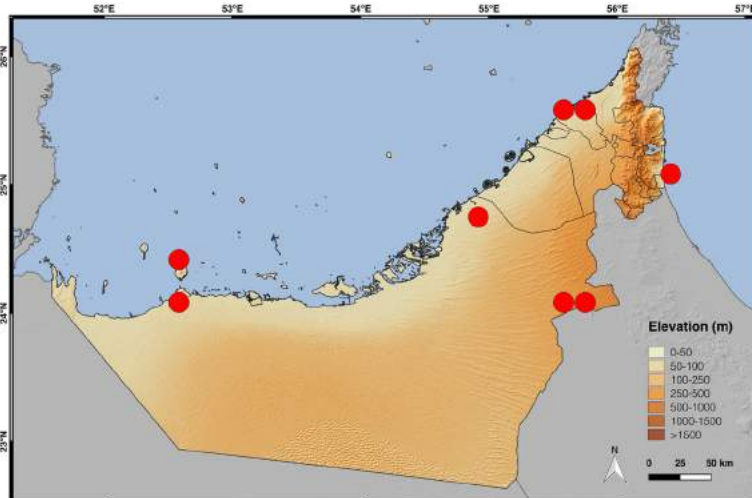

D

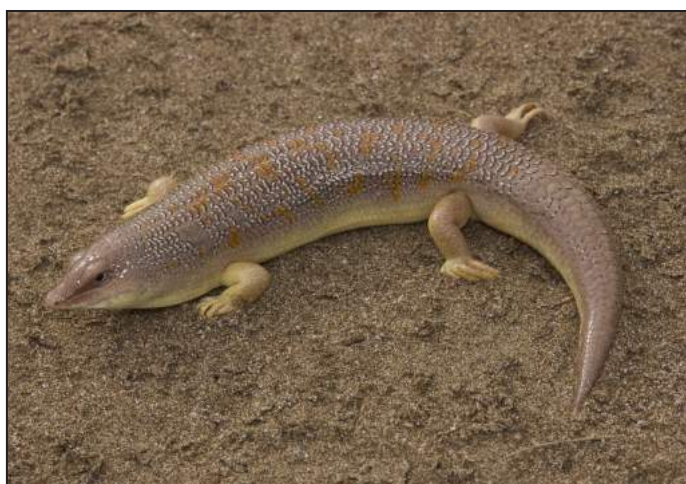

C

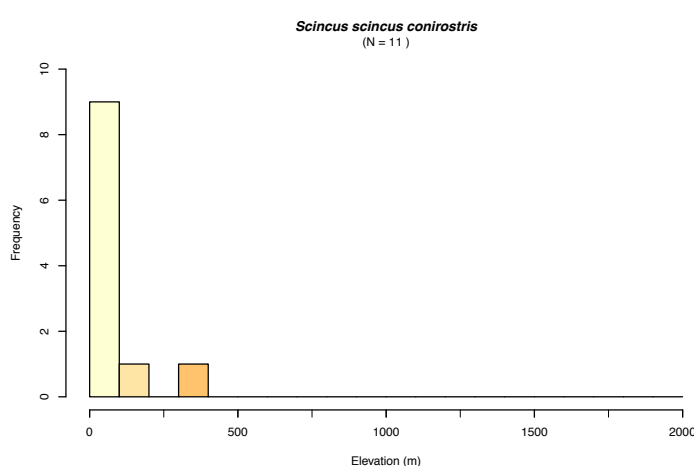

F

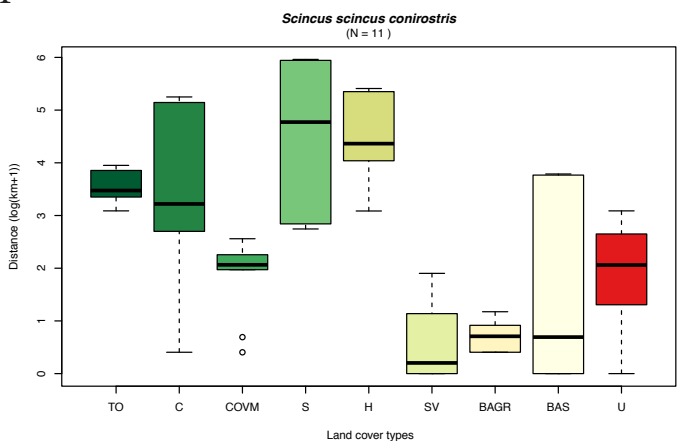

E

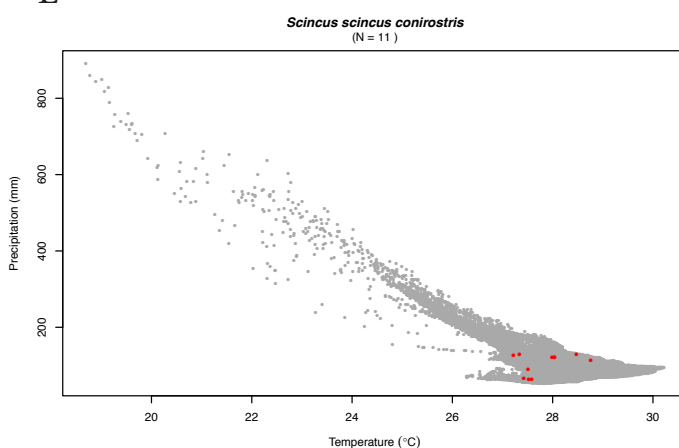

***Trachylepis tessellata***  
(Anderson, 1895)

**S44: Species information**  
Lizards  
Skinks, Scincidae

A

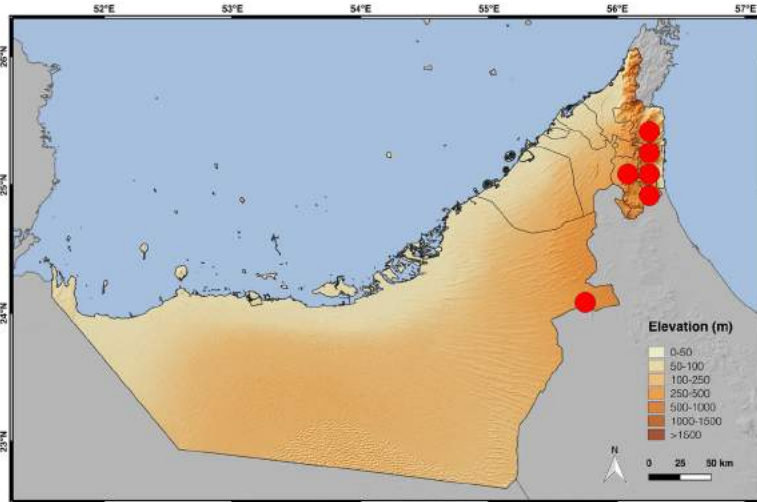

B

Useful information

|               |        |
|---------------|--------|
| IUCN Category | LC/LC  |
| Venomous      | NO     |
| Endemic       | NO     |
| Origin        | Native |

C

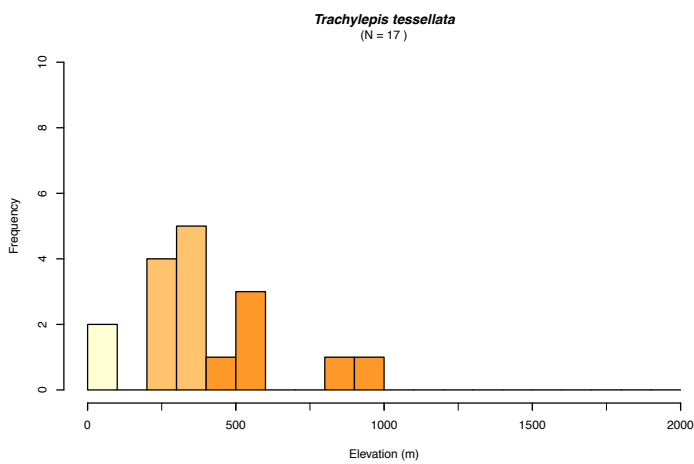

D

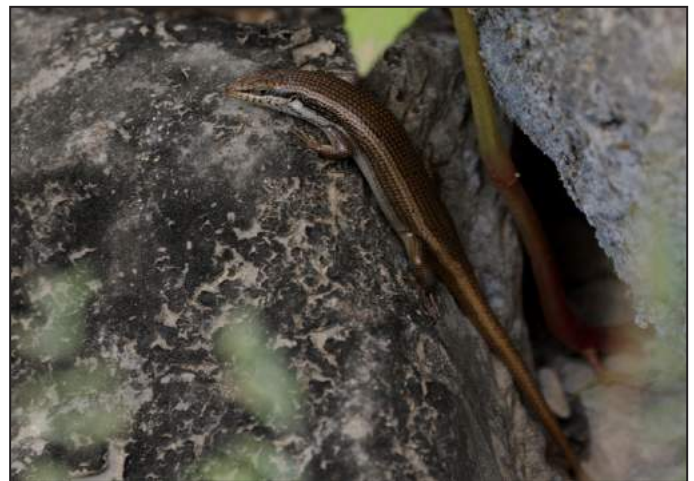

E

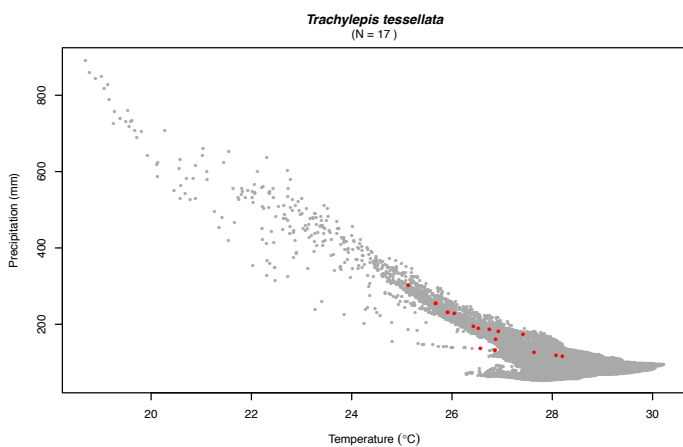

F

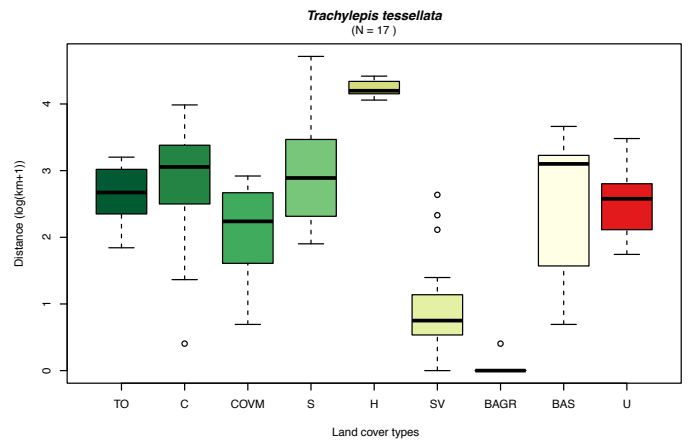

- Lizards
- Agamids
- Gekkos
- Lacertids
- Skinks
- Amphisbaenids
- Varamids
- Snakes
- Boidae
- Colubridae
- Lamprophiidae
- Leptotyphlopidae
- Typhlopidae
- Viperidae

**S45: Species information**

Lizards

Amphisbaenids, Trogonophidae

*Diplometopon zarudnyi*

Nikolsky, 1907

B

Useful information

|               |        |
|---------------|--------|
| IUCN Category | LC/LC  |
| Venomous      | NO     |
| Endemic       | NO     |
| Origin        | Native |

A

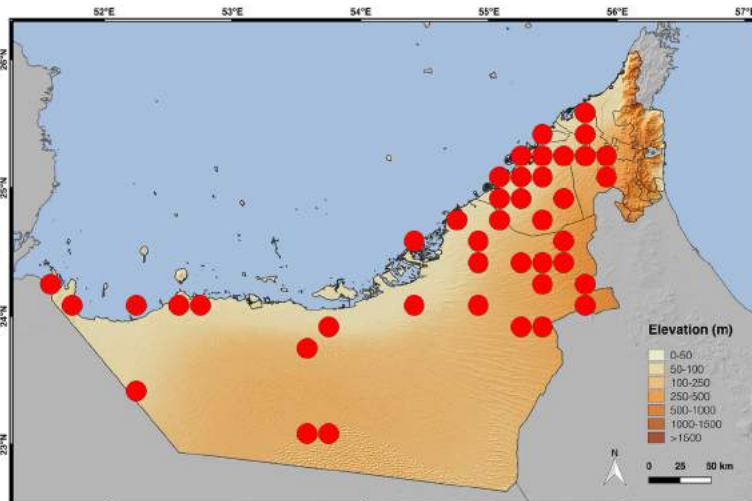

D

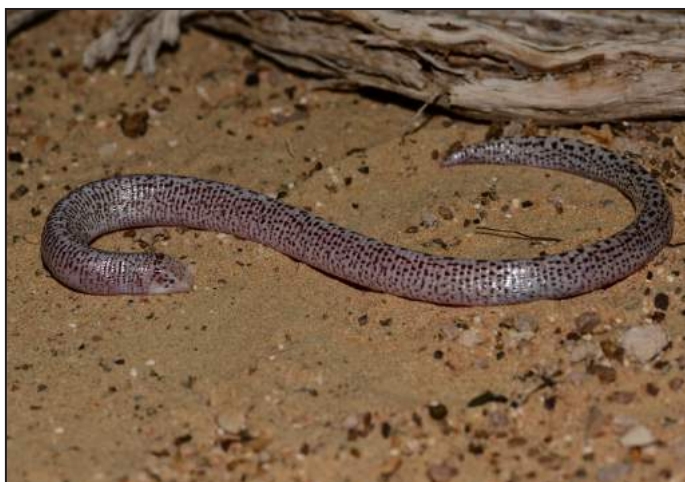

C

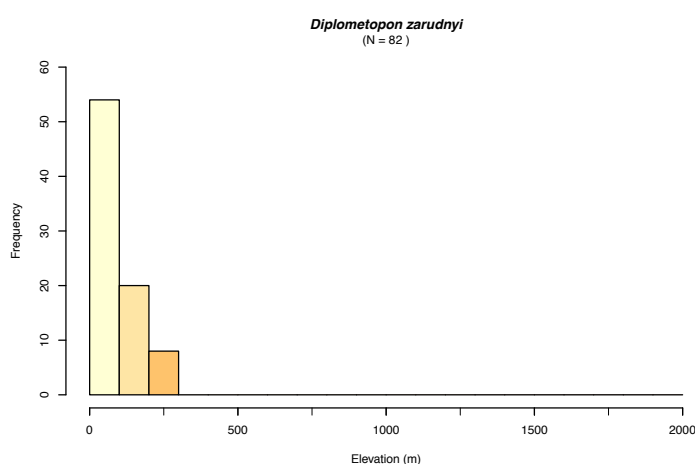

F

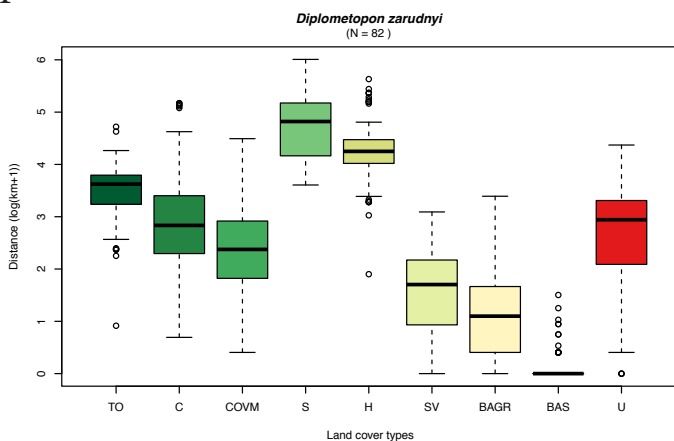

E

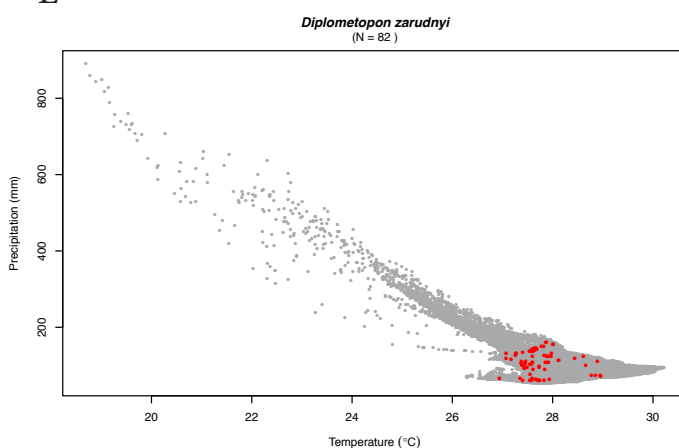

Lizards

Agamids

Geckos

Lacertids

Skinks

Amphisbaenids

Varanids

Snakes

Boidae

Colubridae

Lamprophiidae

Leptotyphlopidae

Typhlopidae

Viperidae

***Varanus griseus griseus***  
(Daudin, 1803)

**S46: Species information**  
Lizards  
Varanids, Varanidae

A

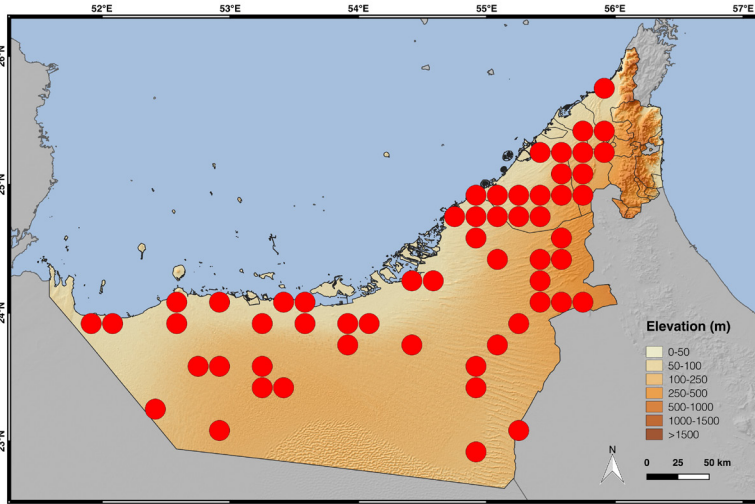

B

Useful information

|               |        |
|---------------|--------|
| IUCN Category | LC/LC  |
| Venomous      | NO     |
| Endemic       | NO     |
| Origin        | Native |

C

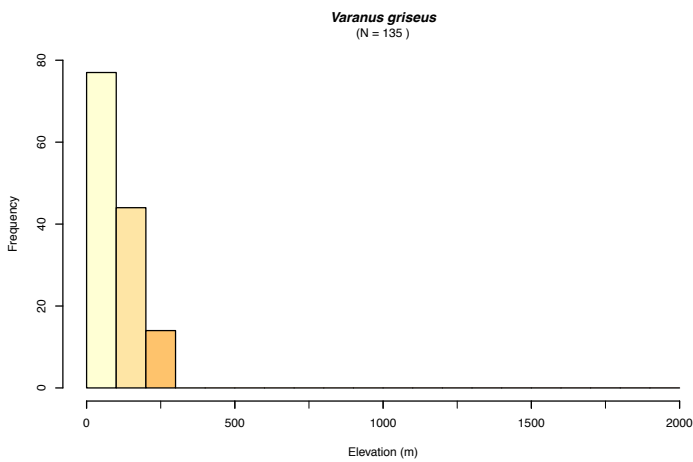

D

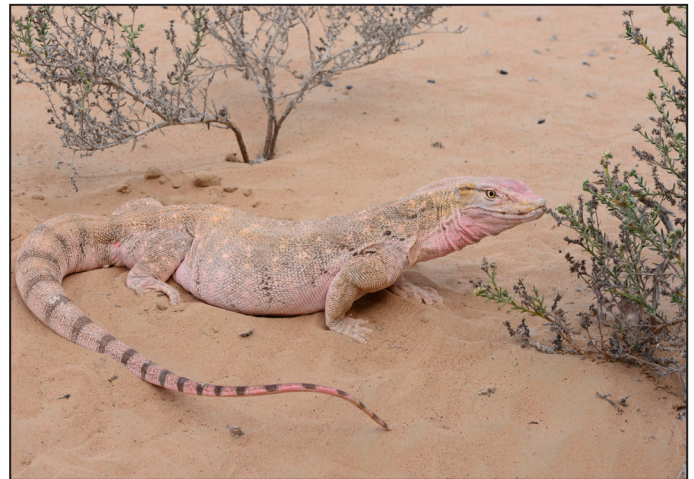

E

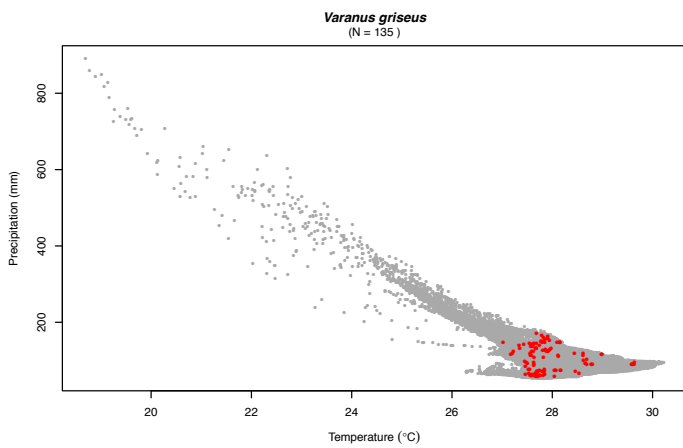

F

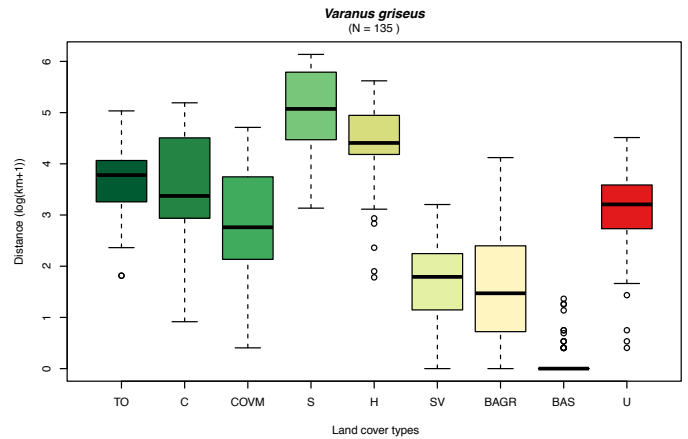

- Lizards
- Agamids
- Gekkos
- Lacertids
- Skinks
- Amphisbaenids
- Varanids**
- Snakes
- Boidae
- Colubridae
- Lamprophiidae
- Leptotyphlopidae
- Typhlopidae
- Viperidae

**S47: Species information**

Snakes  
Boidae

*Eryx jayakari*  
Boulenger, 1888

B

Useful information

|               |        |
|---------------|--------|
| IUCN Category | LC/LC  |
| Venomous      | NO     |
| Endemic       | NO     |
| Origin        | Native |

A

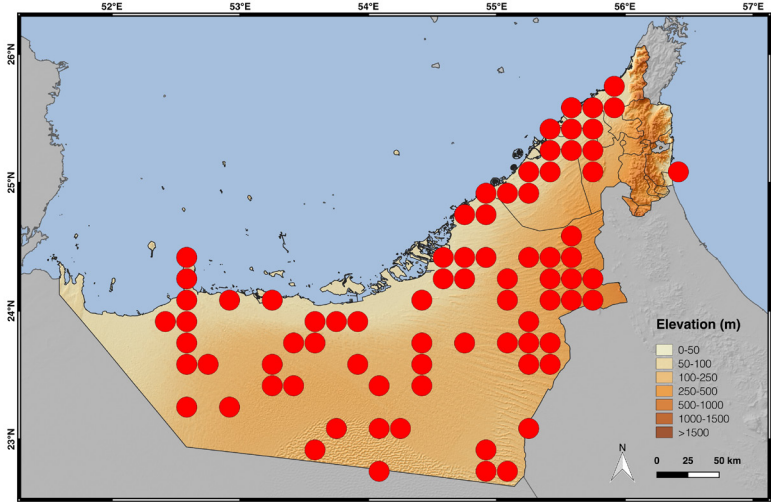

D

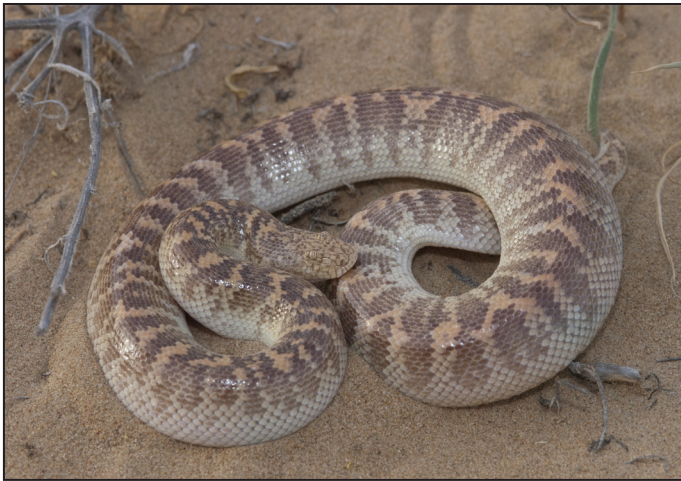

C

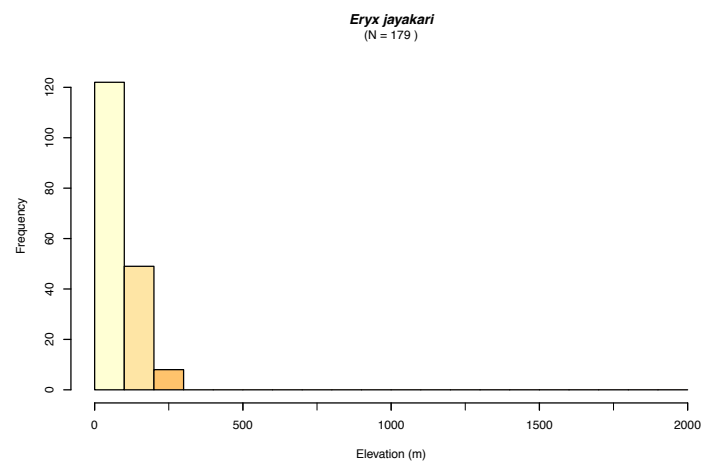

F

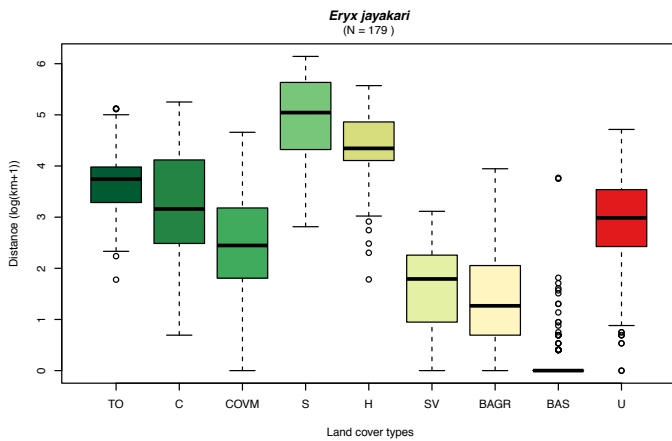

E

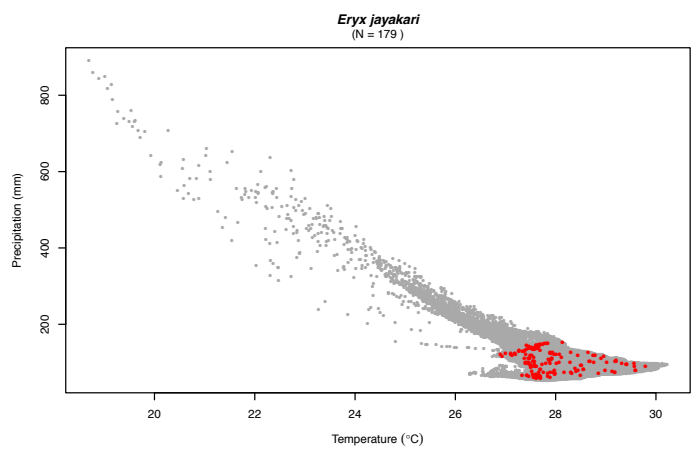

- Lizards
- Agamids
- Geckos
- Lacertids
- Skinkis
- Amphisbaenids
- Varanids
- Snakes
- Boidae
- Colubridae
- Lamprophiidae
- Leptotyphlopidae
- Typhlopidae
- Viperidae



***Lytorhynchus diadema diadema***  
(Duméril, Bibron & Duméril, 1854)

**S48: Species information**  
Snakes  
Colubridae

A

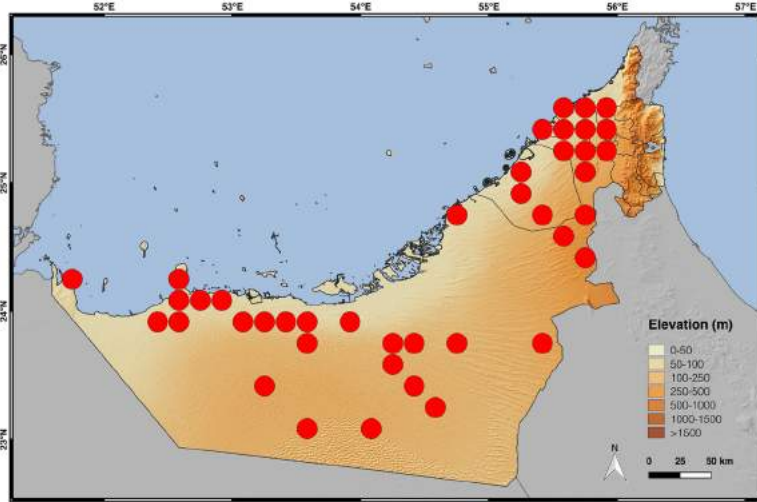

B

Useful information

|               |        |
|---------------|--------|
| IUCN Category | LC/LC  |
| Venomous      | NO     |
| Endemic       | NO     |
| Origin        | Native |

C

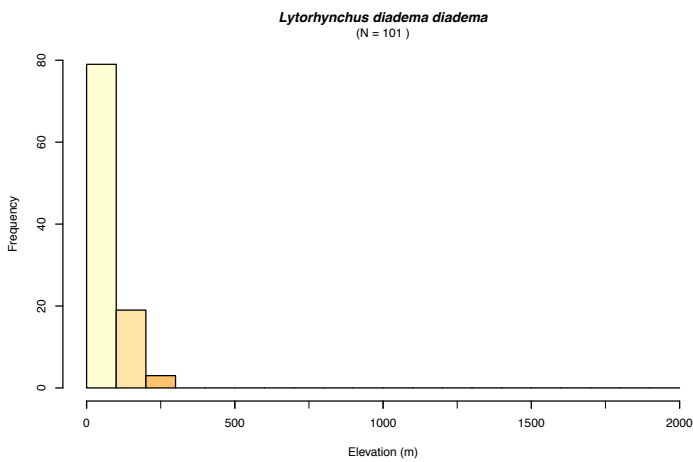

D

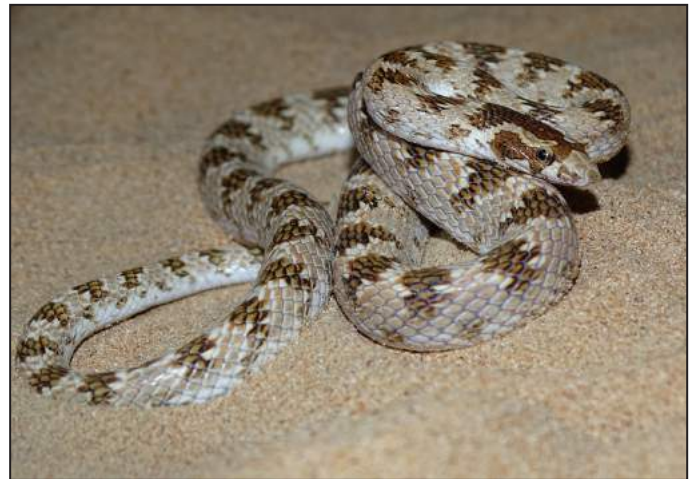

E

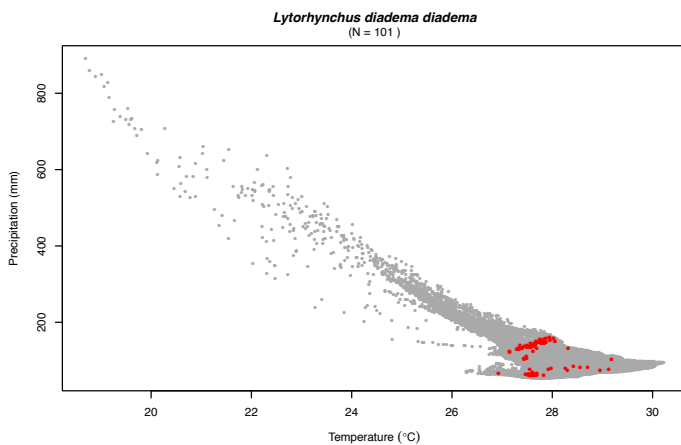

F

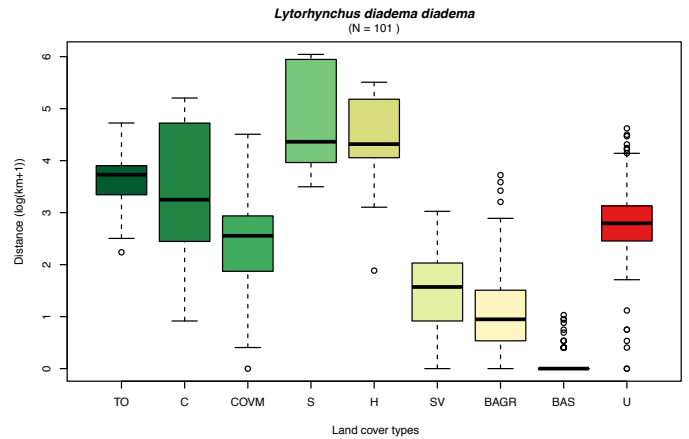

- Lizards
- Agamids
- Gekkos
- Lacertids
- Skinks
- Amphisbaenids
- Varamids
- Snakes
- Boidae
- Colubridae
- Lamprophiidae
- Leptotyphlopidae
- Typhlopidae
- Viperidae

**S49: Species information**

Snakes  
Colubridae

*Platyceps rhodorachis rhodorachis*  
(Jan & Filippi, 1865)

B

Useful information

|               |        |
|---------------|--------|
| IUCN Category | LC/LC  |
| Venomous      | NO     |
| Endemic       | NO     |
| Origin        | Native |

A

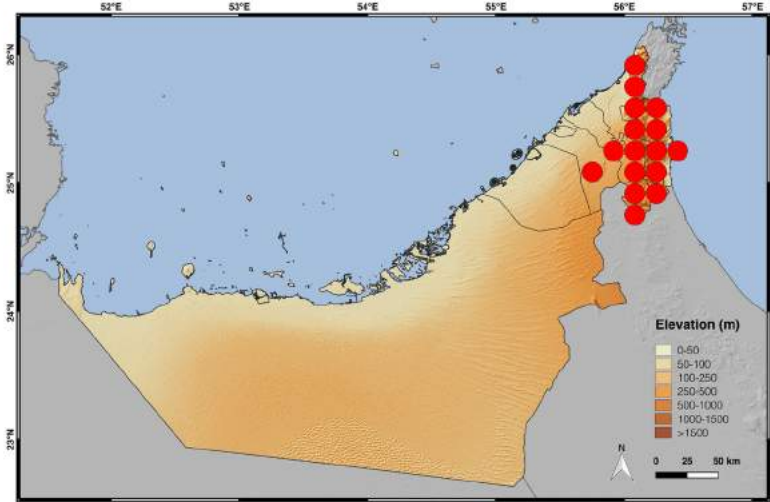

D

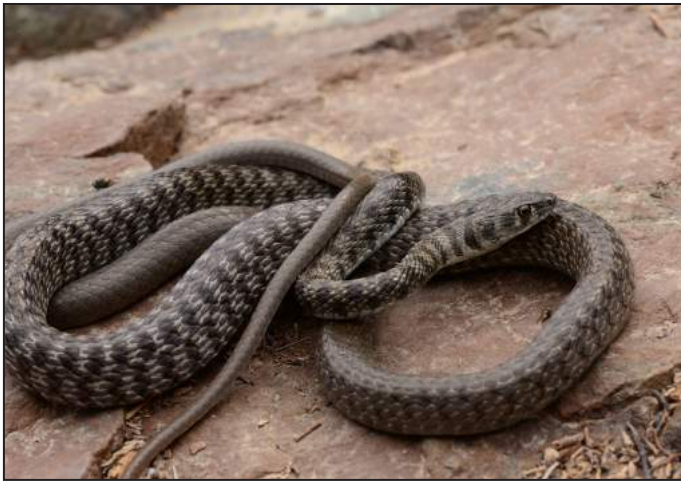

C

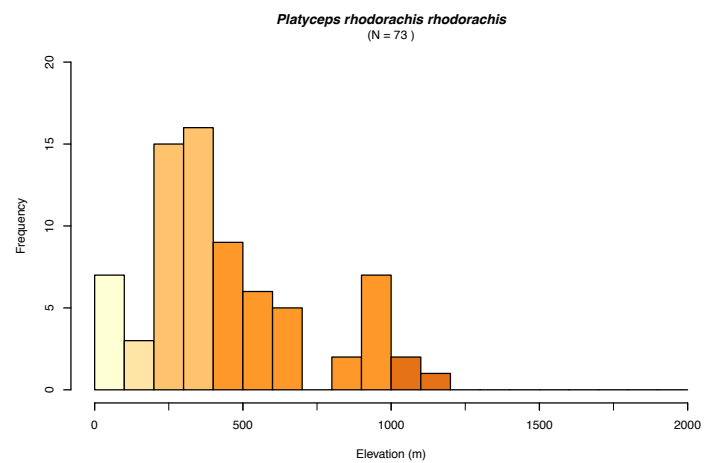

F

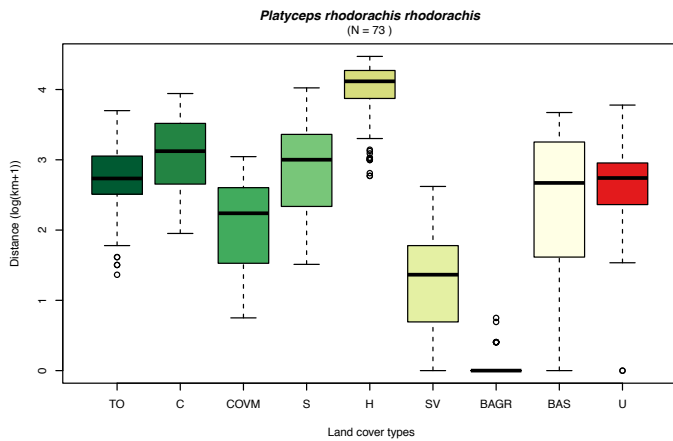

E

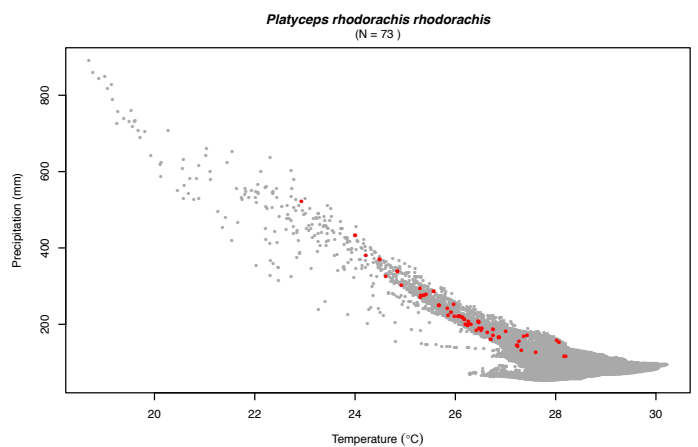

Lizards

Agamids

Geckos

Lacertids

Skinks

Amphisbaenids

Varanids

Snakes

Boidae

Colubridae

Lamprophiidae

Leptotyphlopidae

Typhlopidae

Viperidae

***Platyceps ventromaculatus***  
(Gray, 1834)

**S50: Species information**  
Snakes  
Colubridae

A

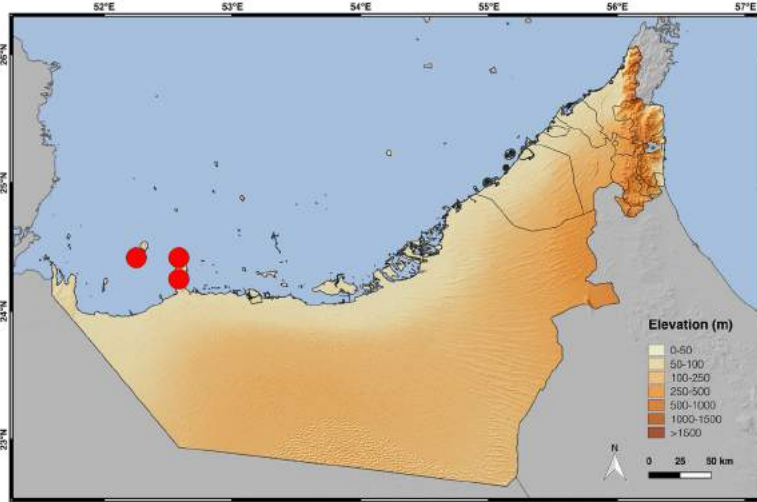

B

Useful information

|               |        |
|---------------|--------|
| IUCN Category | LC/VU  |
| Venomous      | NO     |
| Endemic       | NO     |
| Origin        | Native |

C

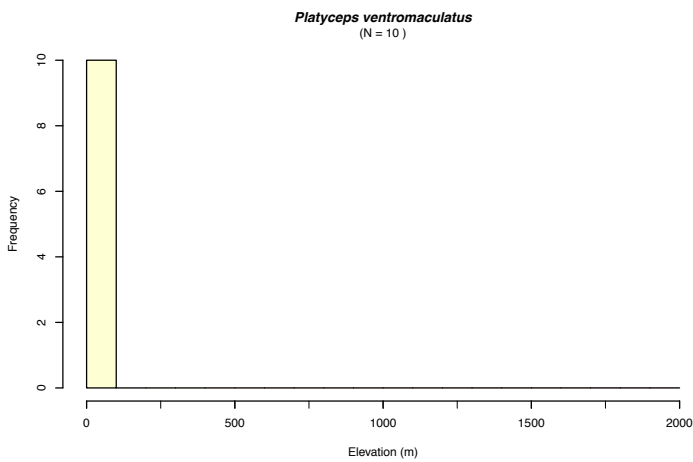

D

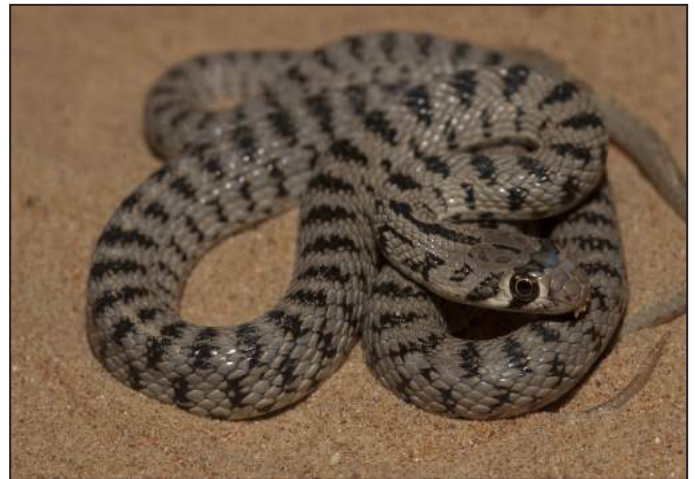

E

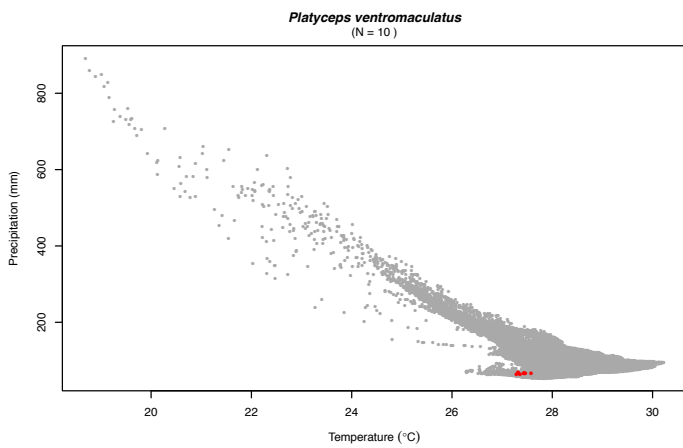

F

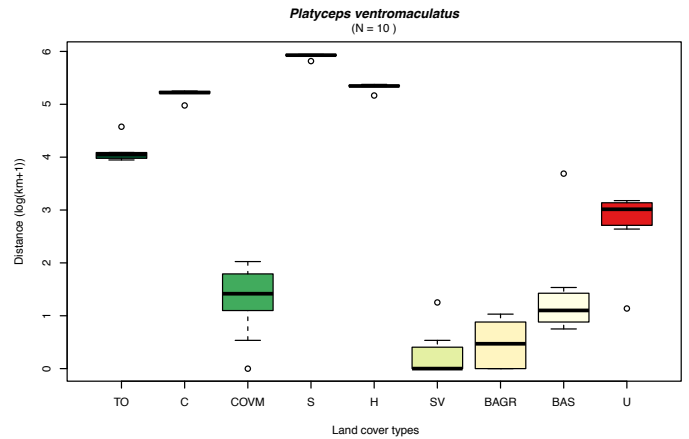

- Lizards
- Agamids
- Gekkos
- Lacertids
- Skinks
- Ampeliscaenids
- Varamids
- Snakes
- Boidae
- Colubridae
- Lamprophiidae
- Leptotyphlopoidea
- Typhlopoidea
- Viperidae

**S51: Species information**

Snakes  
Colubridae

*Spalerosophis diadema cliffordii*  
(Schlegel, 1837)

B

Useful information

|               |        |
|---------------|--------|
| IUCN Category | LC/LC  |
| Venomous      | NO     |
| Endemic       | NO     |
| Origin        | Native |

A

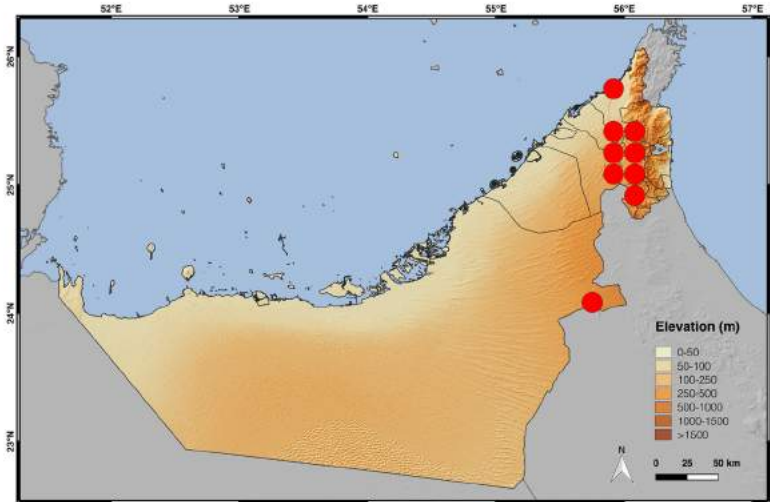

D

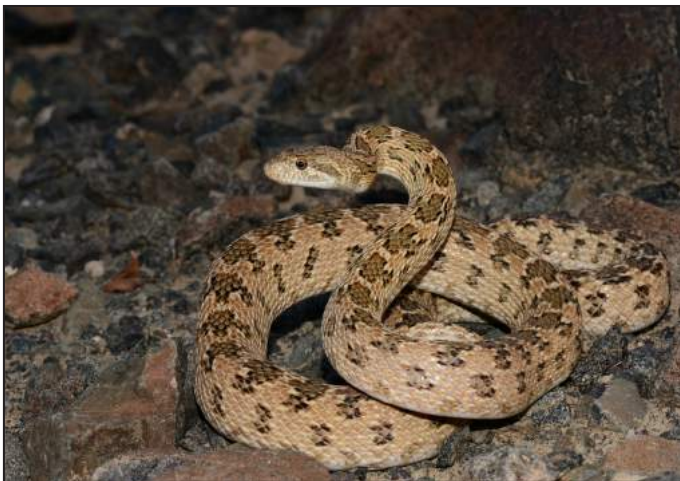

C

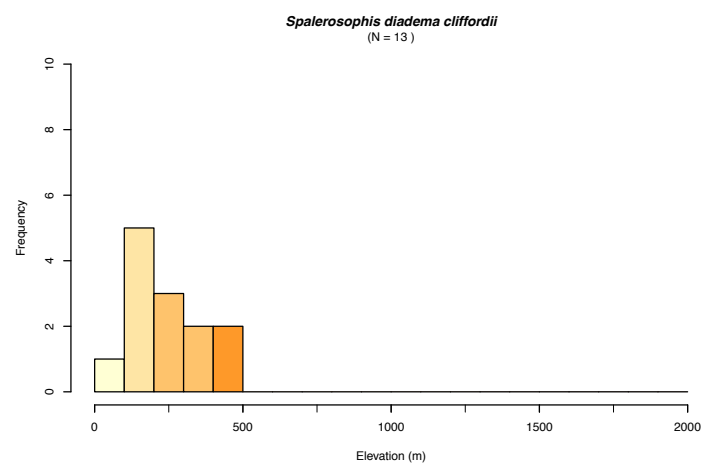

F

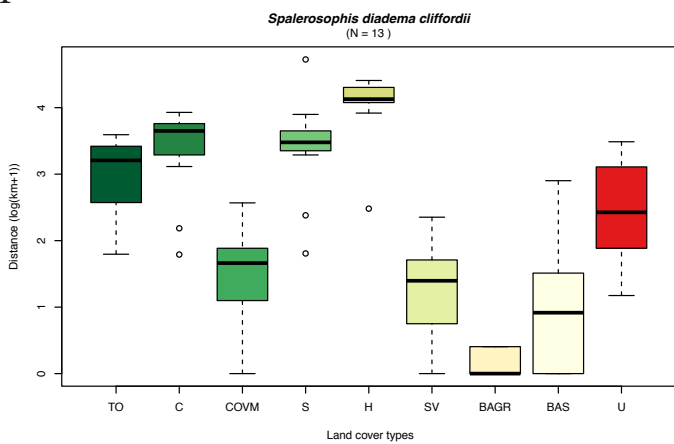

E

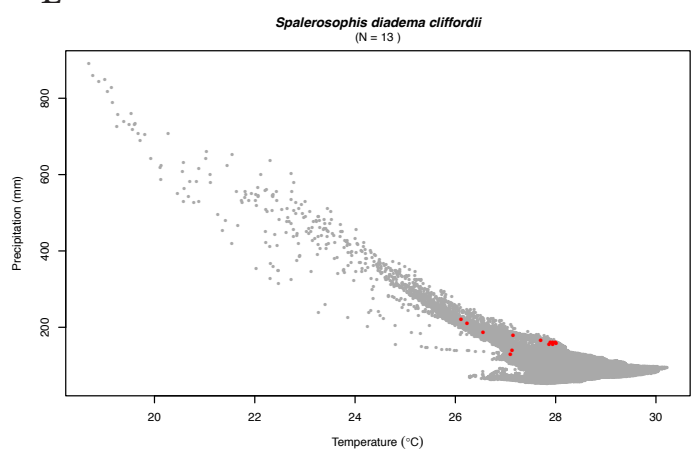

***Telescopus dhara dhara***  
(Forskål, 1775)

**S52: Species information**  
Snakes  
Colubridae

A

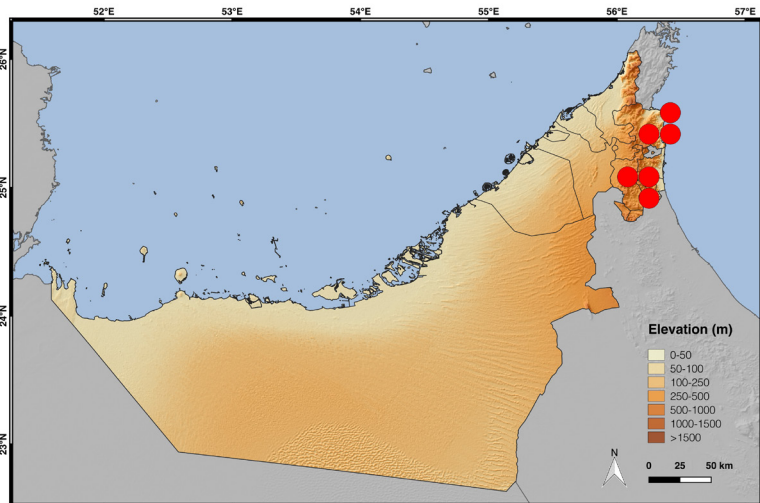

B

Useful information

|               |          |
|---------------|----------|
| IUCN Category | LC/LC    |
| Venomous      | Slightly |
| Endemic       | NO       |
| Origin        | Native   |

C

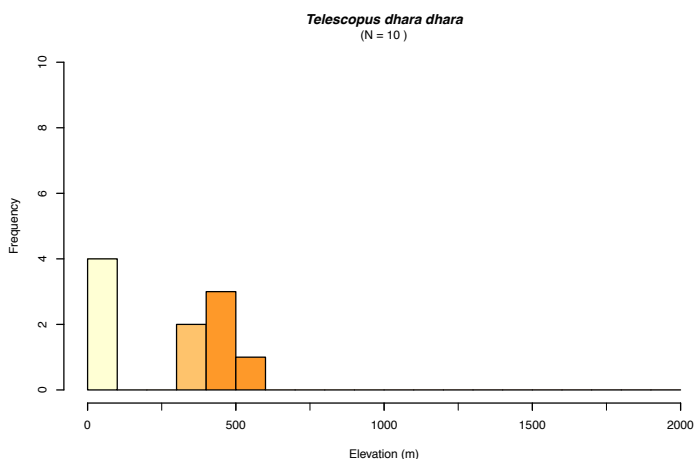

D

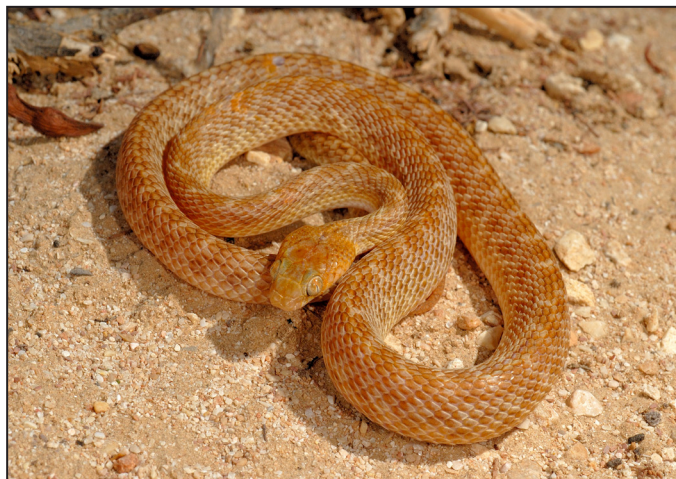

E

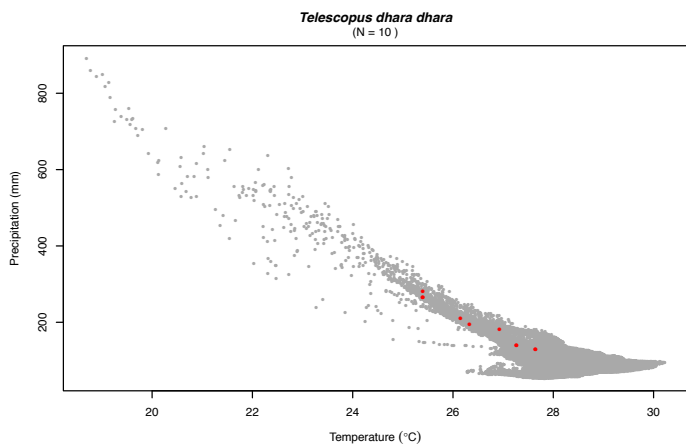

F

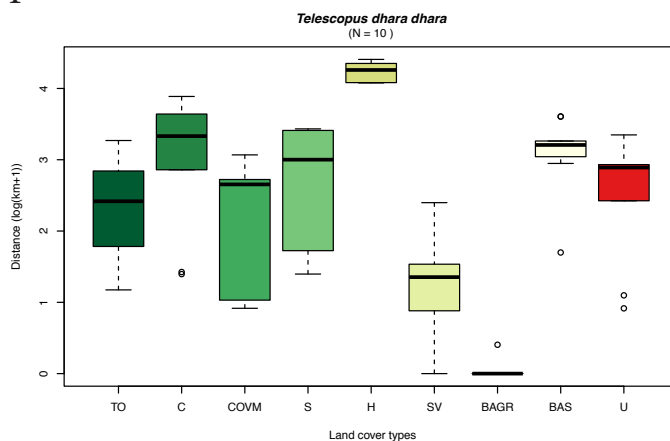

- Lizards
- Agamids
- Gekkos
- Lacertids
- Skinks
- Ampeliscaenids
- Varamids
- Snakes
- Boidae
- Colubridae
- Lamprophiidae
- Leptotyphlopoidea
- Typhlopoidea
- Viperidae

**S53: Species information**

Snakes  
Lamprophiidae

***Psammophis schokari***  
(Forskål, 1775)

B

Useful information

|               |          |
|---------------|----------|
| IUCN Category | LC/LC    |
| Venomous      | Slightly |
| Endemic       | NO       |
| Origin        | Native   |

A

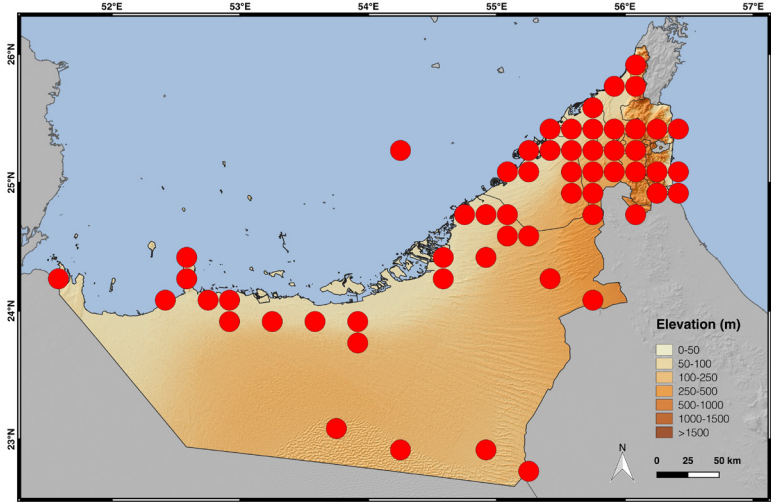

D

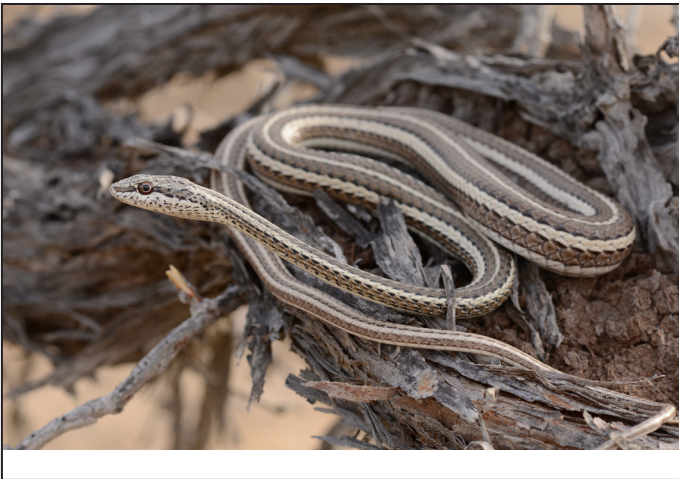

C

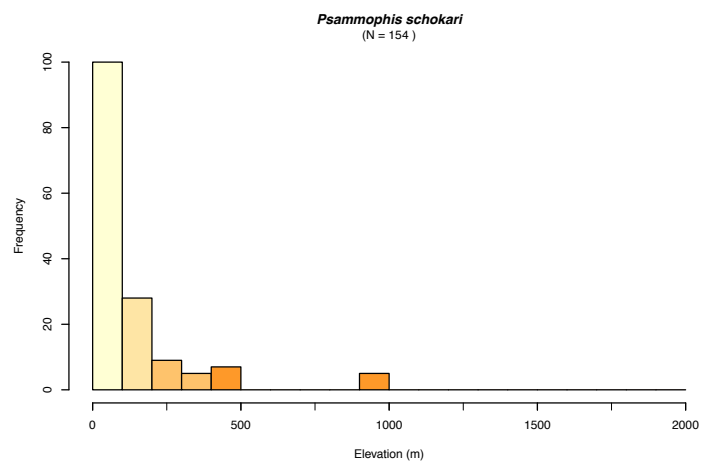

F

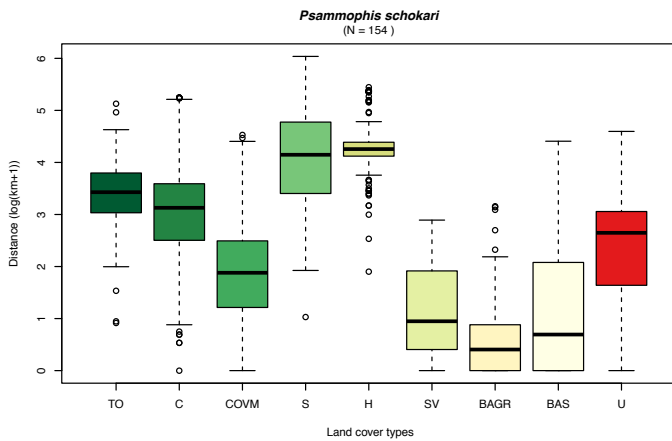

E

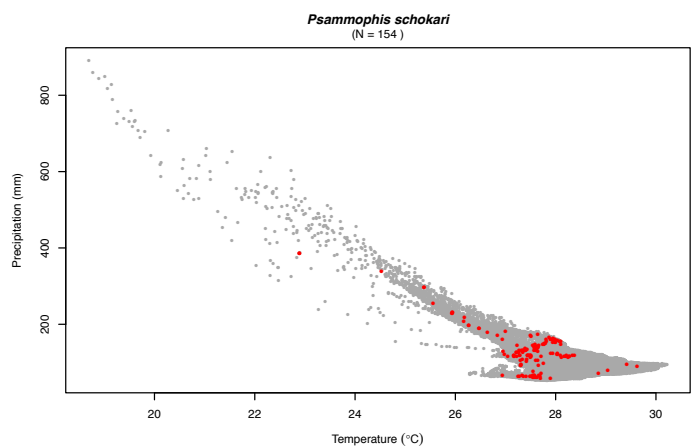

Lizards

Agamids

Geckos

Lacertids

Skinks

Amphisbaenids

Varanids

Snakes

Boidae

Colubridae

Lamprophiidae

Leptotyphlopidae

Typhlopidae

Viperidae

***Rhagerhis moilensis***  
(Reuss, 1834)

**S54: Species information**  
Snakes  
Lamprophiidae

A

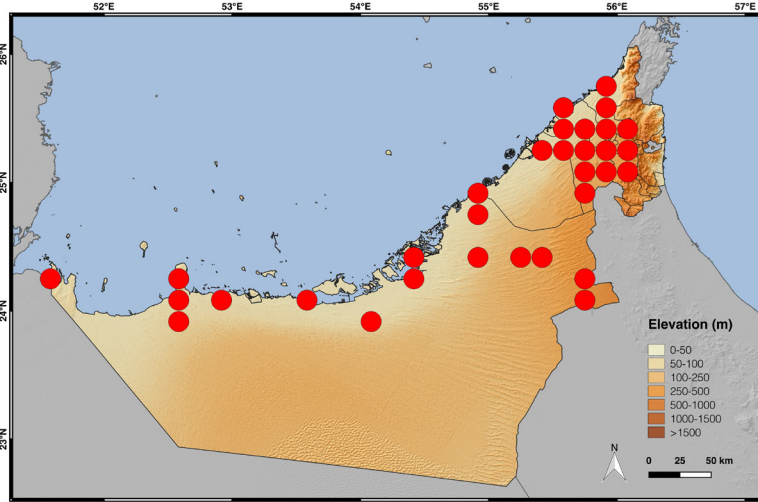

B

Useful information

|               |          |
|---------------|----------|
| IUCN Category | LC/LC    |
| Venomous      | Slightly |
| Endemic       | NO       |
| Origin        | Native   |

C

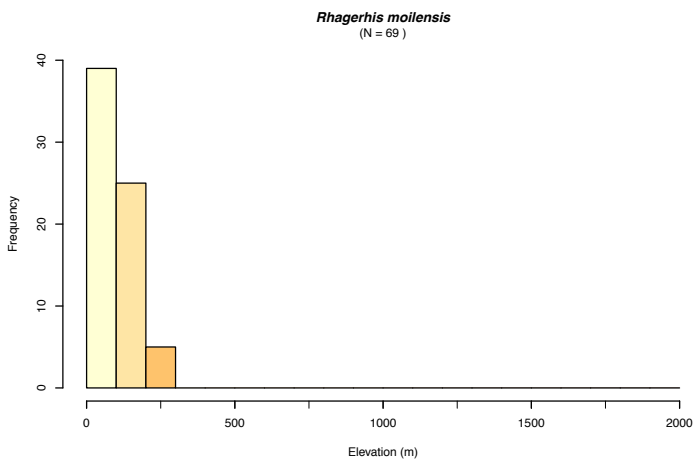

D

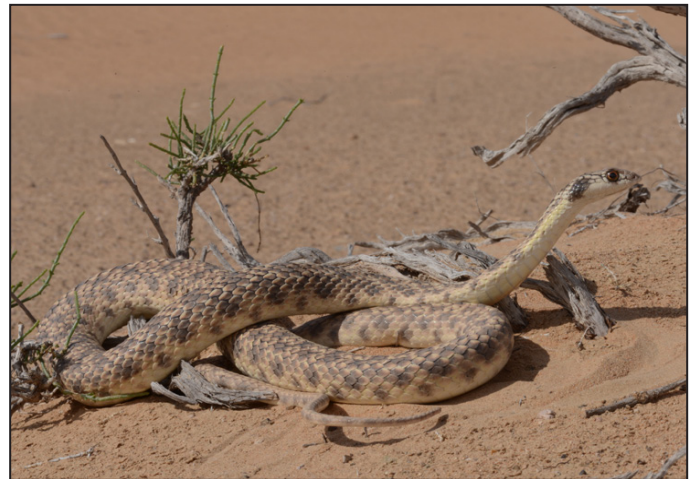

E

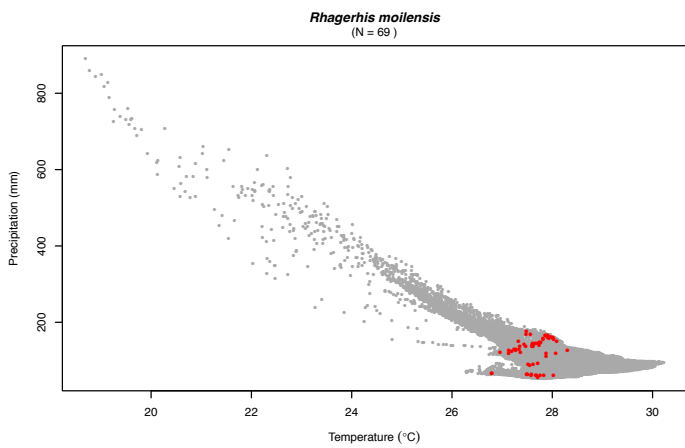

F

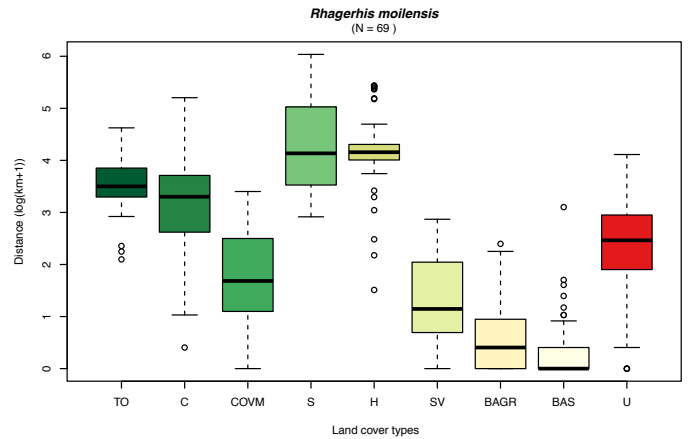

- Lizards
- Agamids
- Gekkos
- Lacertids
- Skinks
- Amphisbaenids
- Varamids
- Snakes**
- Boidae
- Colubridae
- Lamprophiidae
- Leptotyphlopoidea
- Typhlopoidea
- Viperidae

**S55: Species information**

Snakes  
Leptotyphlopidae

*Myriopholis macrorhyncha*  
(Jan, 1860)

B

Useful information

|               |        |
|---------------|--------|
| IUCN Category | LC/LC  |
| Venomous      | NO     |
| Endemic       | NO     |
| Origin        | Native |

A

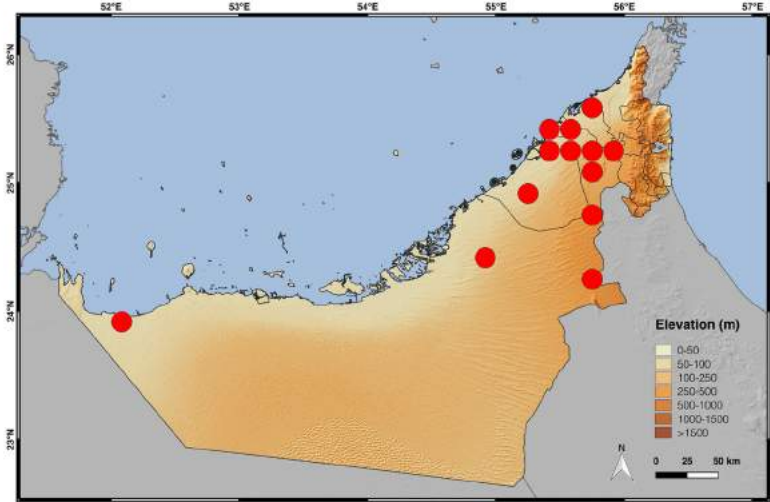

D

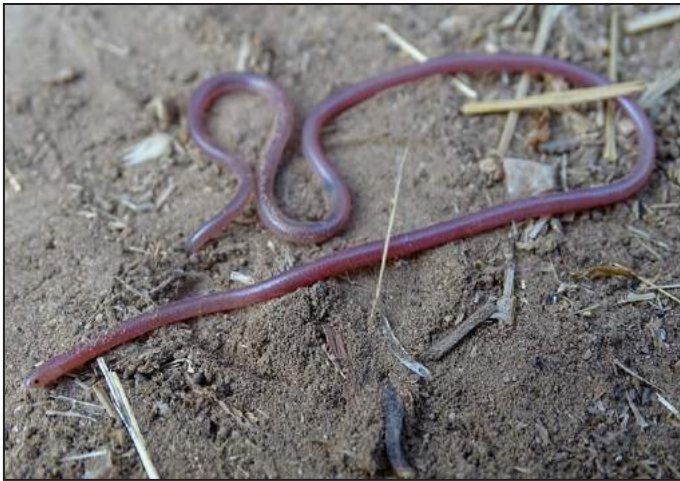

C

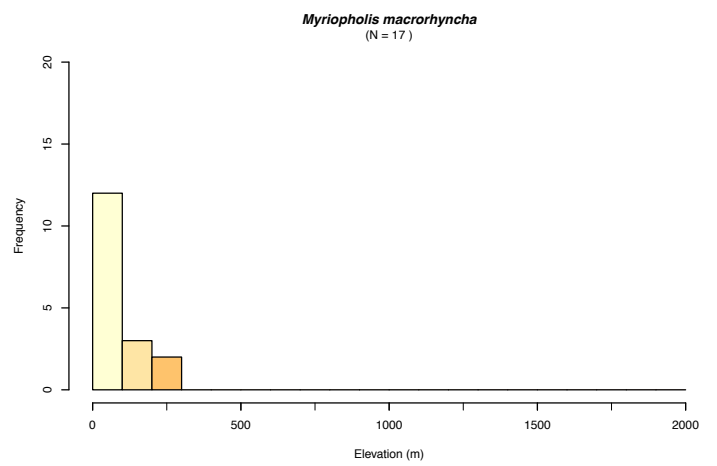

F

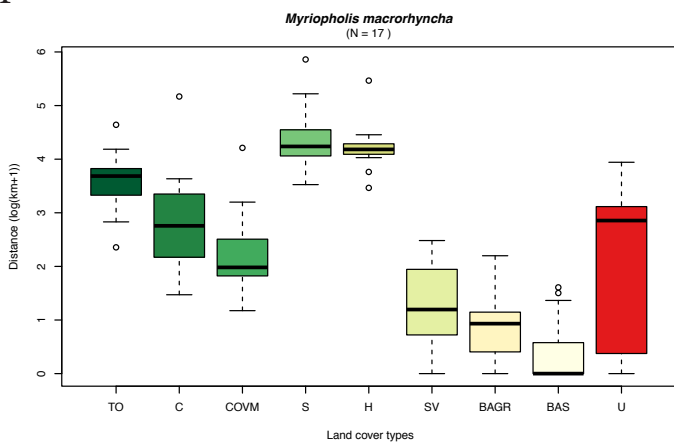

E

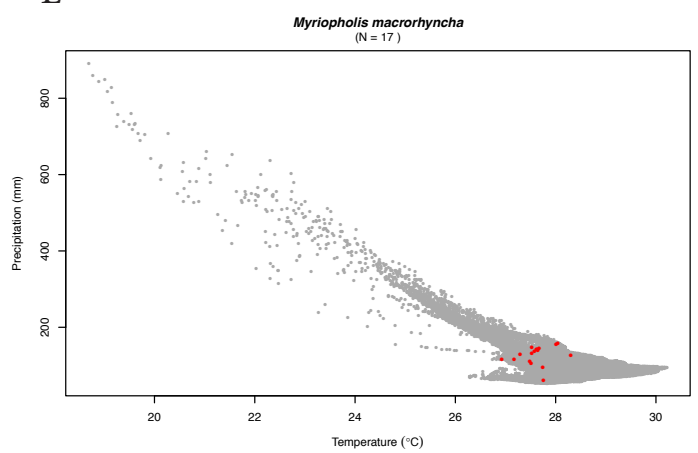

Lizards

Agamids

Geckos

Lacertids

Skinkis

Amphisbaenids

Varanids

Snakes

Boidae

Colubridae

Lamprophiidae

Leptotyphlopidae

Typhlopidae

Viperidae



***Indotyphlops braminus***  
(Daudin, 1803)

**S56: Species information**  
Snakes  
Typhlopidae

A

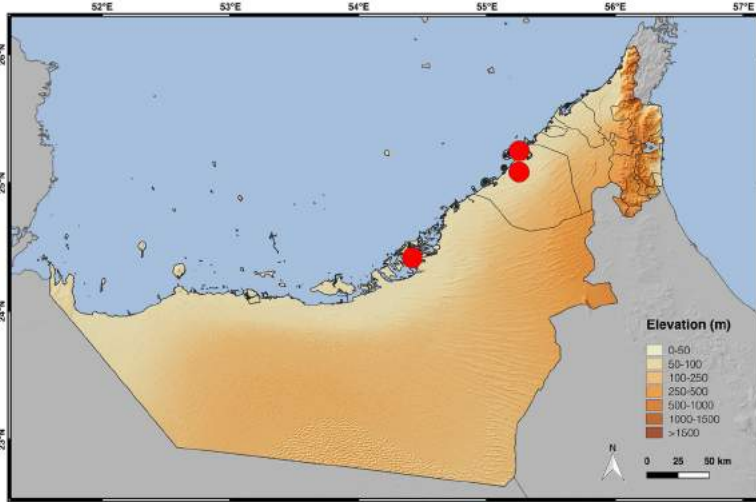

B

Useful information

|               |            |
|---------------|------------|
| IUCN Category | LC/NA      |
| Venomous      | NO         |
| Endemic       | NO         |
| Origin        | Introduced |

C

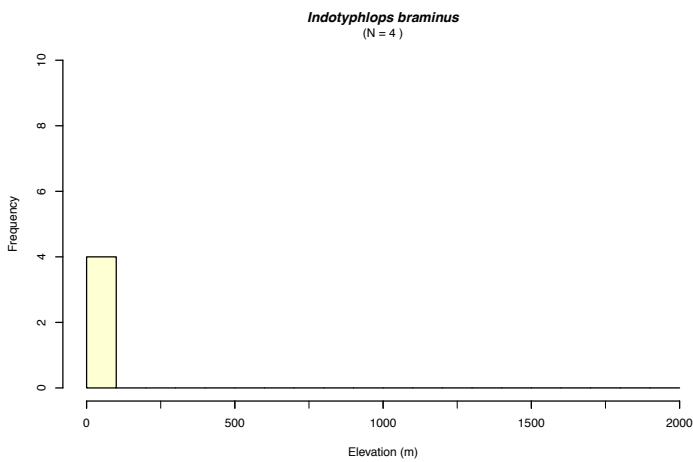

D

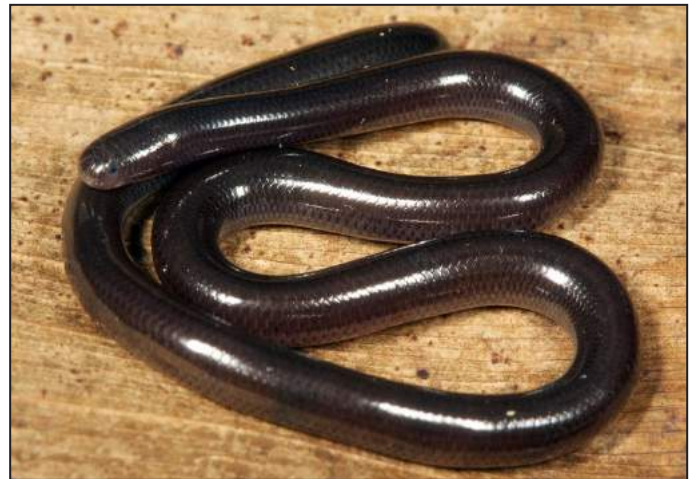

E

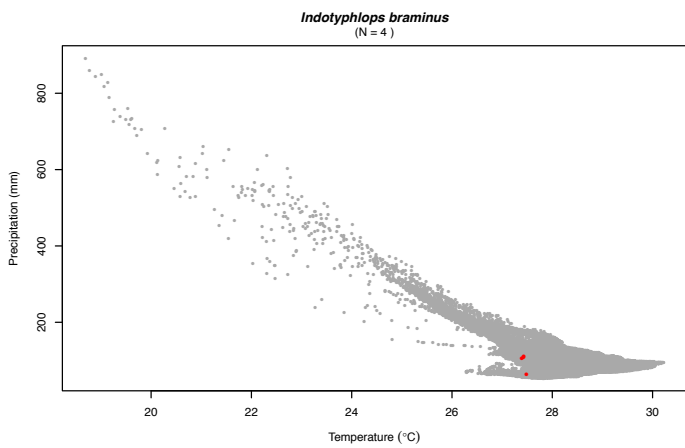

F

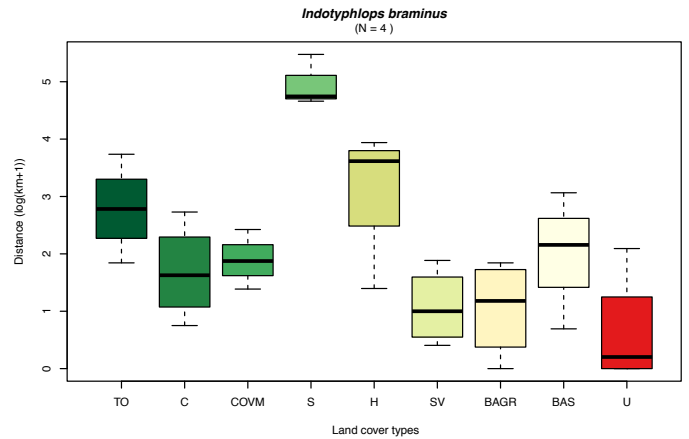

- Lizards
- Agamids
- Gekkos
- Lacertids
- Skinks
- Amphisbaenids
- Varamids
- Snakes**
- Boidae
- Colubridae
- Lamprophiidae
- Leptotyphlopidae
- Typhlopidae**
- Viperidae

**S57: Species information**

Snakes  
Viperidae

***Cerastes gasperettii gasperettii***  
Leviton & Anderson, 1967

B

Useful information

|               |        |
|---------------|--------|
| IUCN Category | LC/LC  |
| Venomous      | YES    |
| Endemic       | NO     |
| Origin        | Native |

A

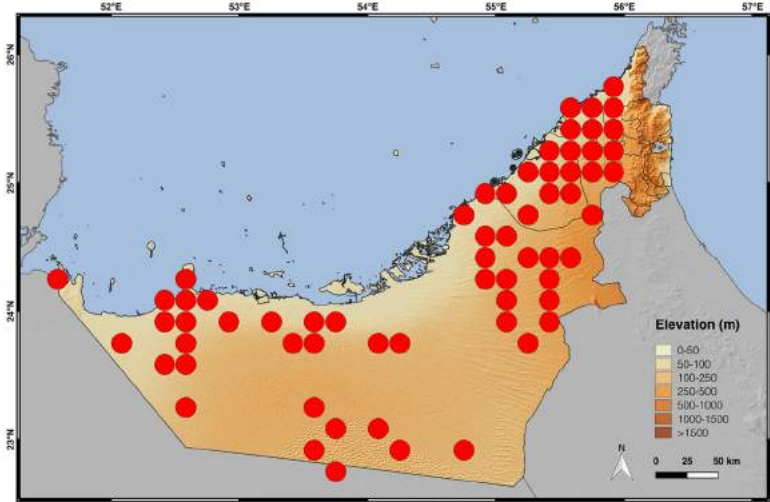

D

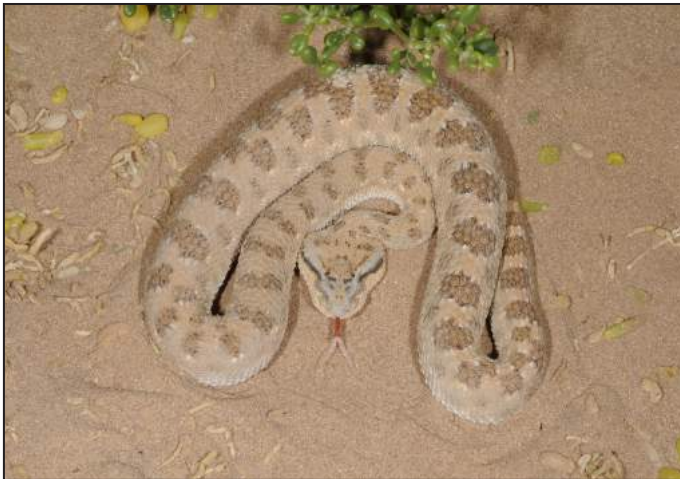

C

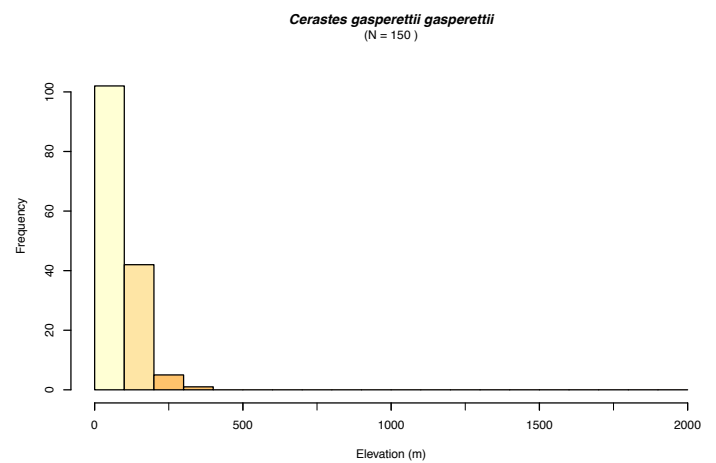

F

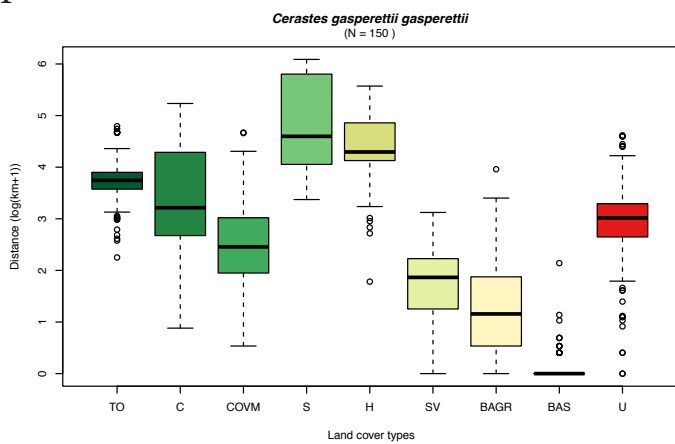

E

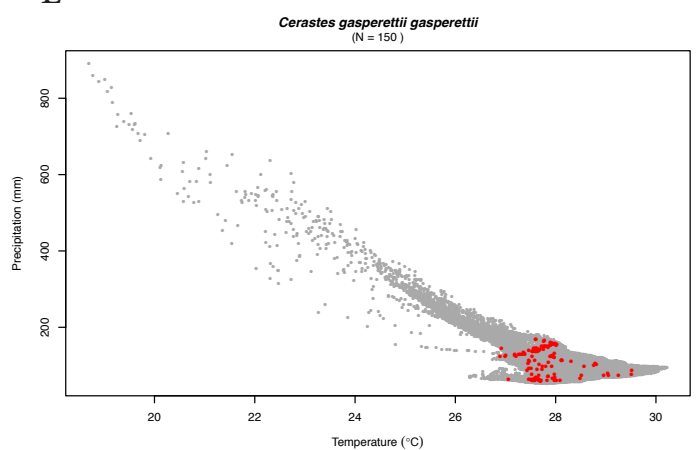

Lizards

Agamids

Geckos

Lacertids

Skinkis

Amphisbaenids

Varanids

Snakes

Boidae

Colubridae

Lamprophiidae

Leptotyphlopidae

Typhlopidae

Viperidae

***Echis carinatus sochureki***  
**Stemmler, 1969**

**S58: Species information**  
 Snakes  
 Viperidae

A

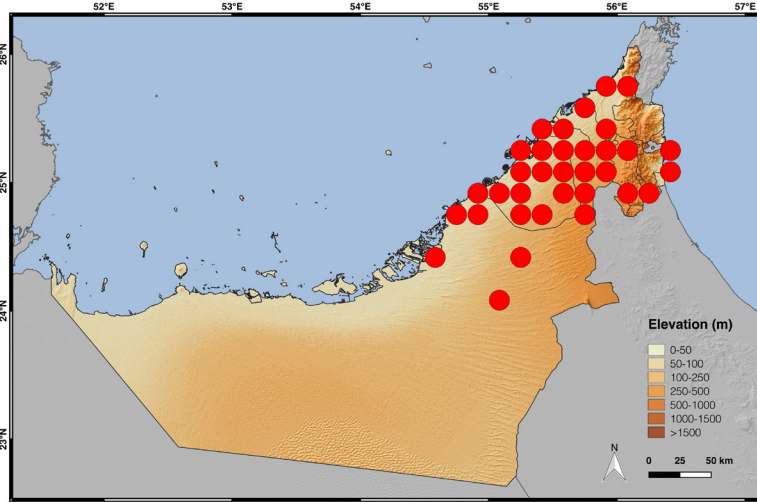

B

Useful information

|               |        |
|---------------|--------|
| IUCN Category | LC/LC  |
| Venomous      | YES    |
| Endemic       | NO     |
| Origin        | Native |

C

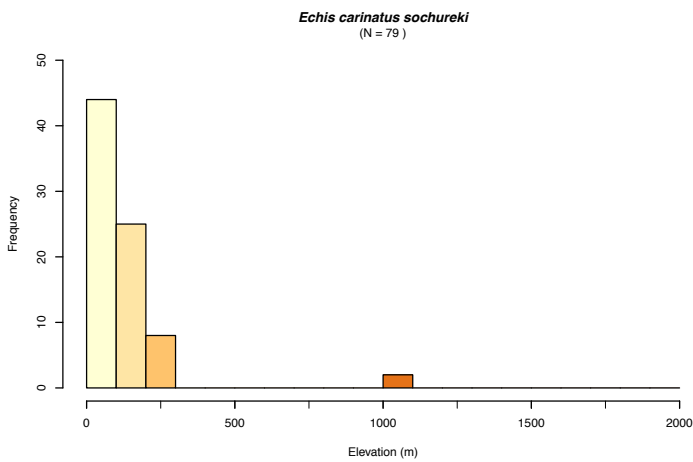

D

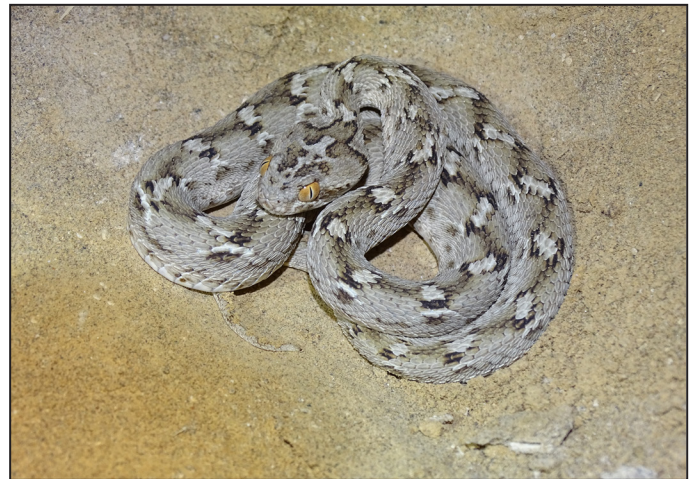

E

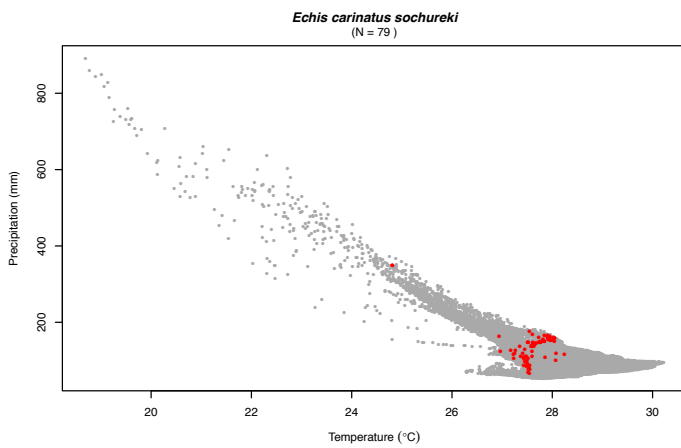

F

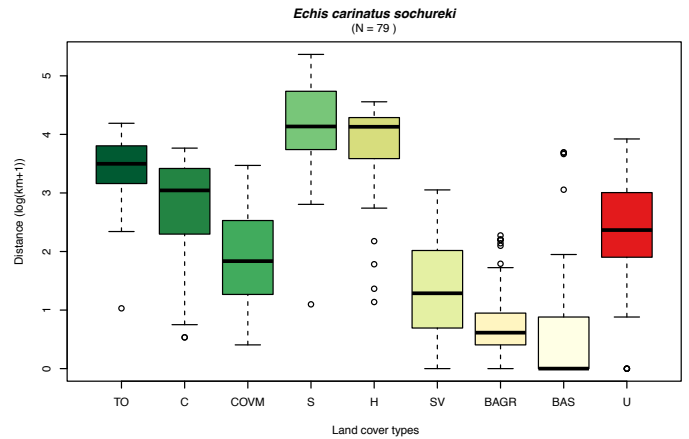

- Lizards
- Agamids
- Gekkos
- Lacertids
- Skinks
- Amphisbaenids
- Varamids
- Snakes**
- Boidae
- Colubridae
- Lamprophiidae
- Leptotyphlopoidea
- Typhlopoidea
- Viperidae

**S59: Species information**

Snakes  
Viperidae

*Echis omanensis*  
Babocsay, 2004

B

Useful information

|               |        |
|---------------|--------|
| IUCN Category | LC/LC  |
| Venomous      | YES    |
| Endemic       | NO     |
| Origin        | Native |

A

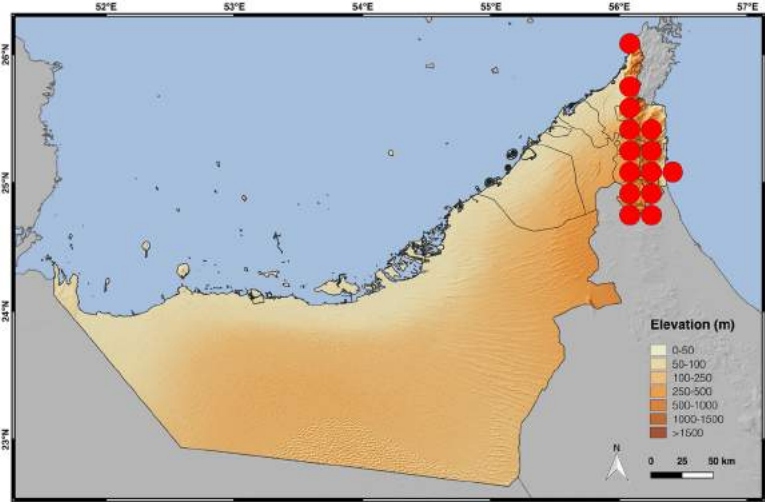

D

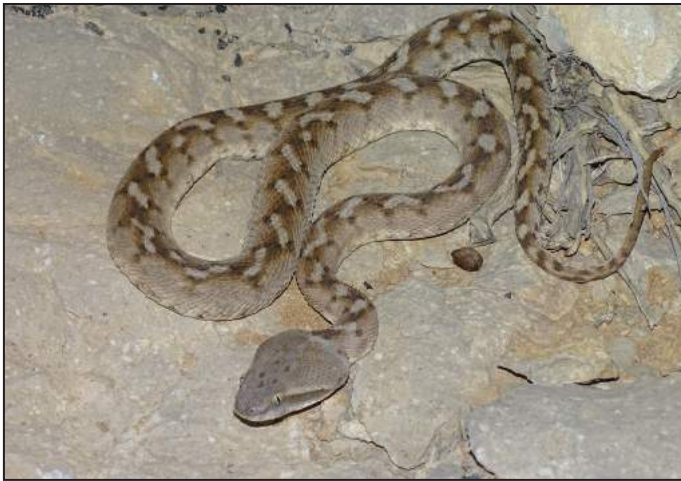

C

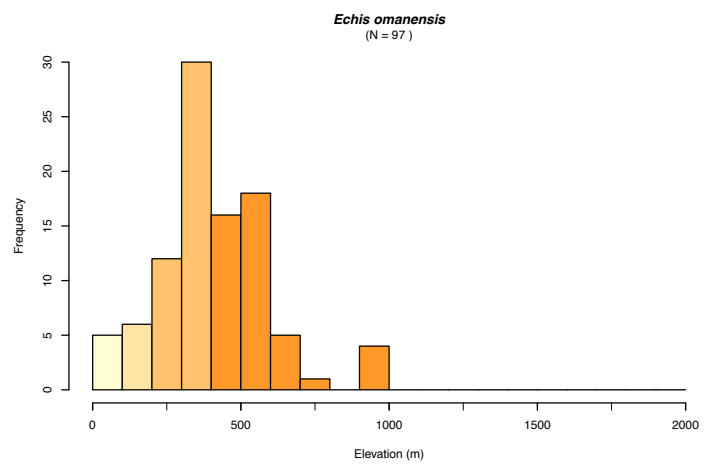

F

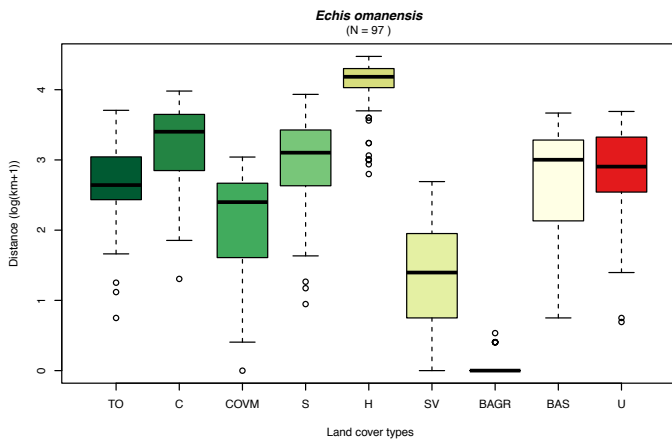

E

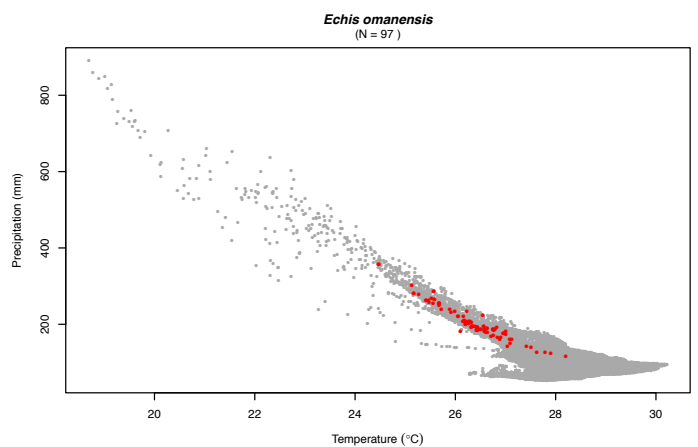

Lizards

Agamids

Geckos

Lacertids

Skinkis

Amphisbaenids

Varanids

Snakes

Boidae

Colubridae

Lamprophiidae

Leptotyphlopidae

Typhlopidae

Viperidae

***Pseudocerastes persicus***  
**Duméril, Bibron & Duméril, 1854**

**S60: Species information**  
 Snakes  
 Viperidae

A

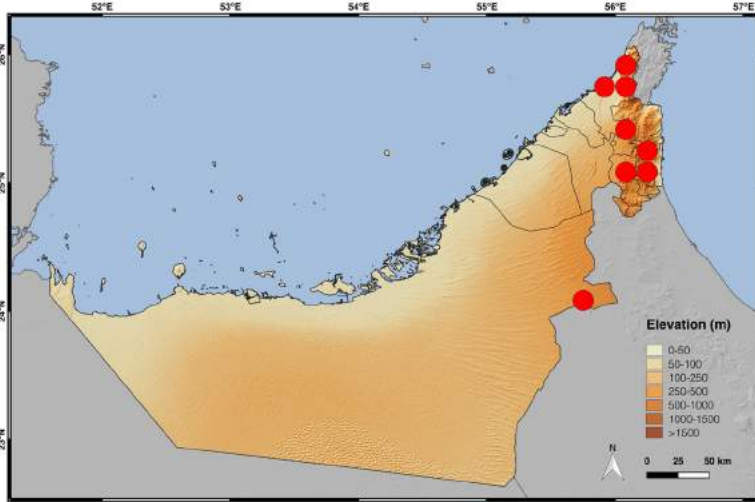

B

Useful information

|               |        |
|---------------|--------|
| IUCN Category | LC/LC  |
| Venomous      | YES    |
| Endemic       | NO     |
| Origin        | Native |

C

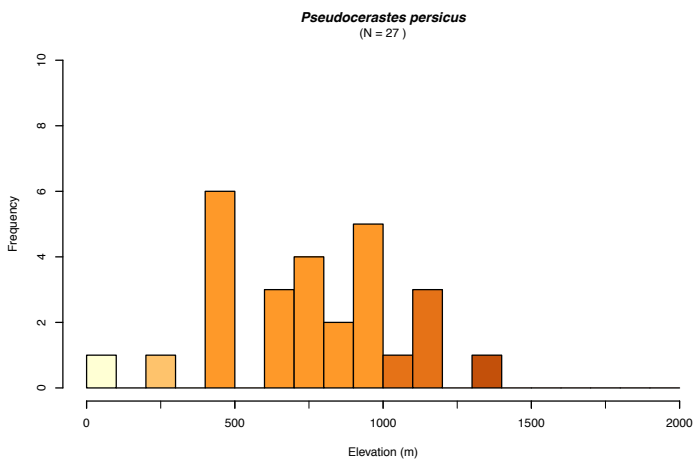

D

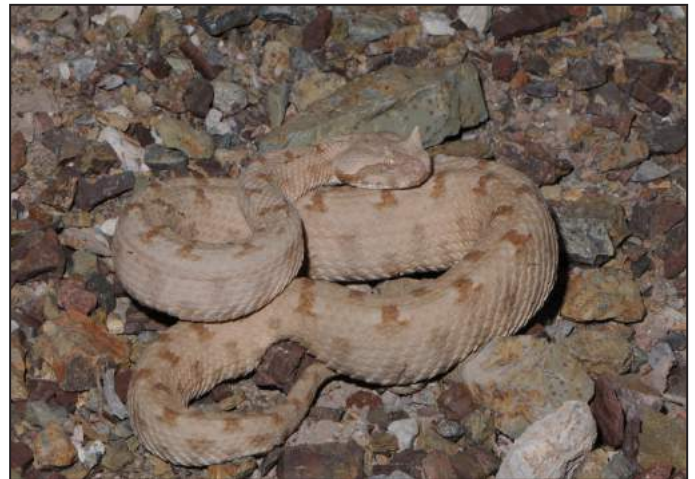

E

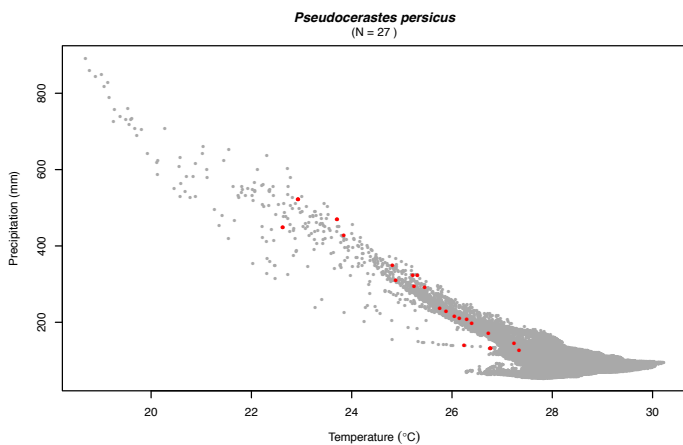

F

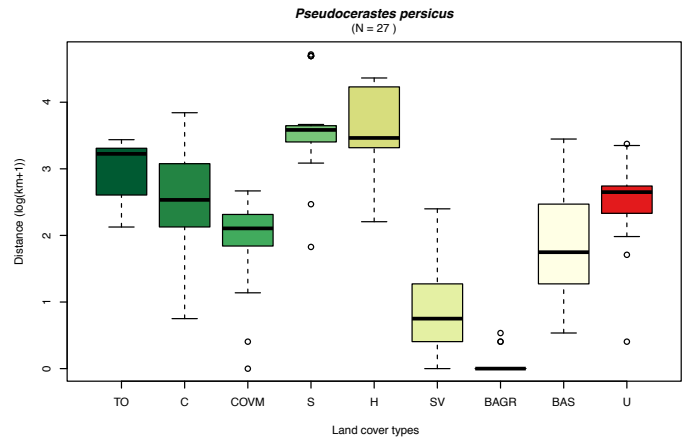

- Lizards
- Agamids
- Gekkos
- Lacertids
- Skinks
- Amphisbaenids
- Varamids
- Snakes**
- Boidae
- Colubridae
- Lamprophiidae
- Leptotyphlopidae
- Typhlopidae
- Viperidae

## S61-S62: Species distribution models

Plates contain independent maps for each species showing the species' potential distribution inferred with a species distribution model (SDM) and using four ecological and environmental variables (see materials and methods 2.8). For each species there are two maps: **A**) a map of the modeled species distribution at a resolution of 10 arc-minutes (~18 km) and **B**) a map of the modeling at a 1km<sup>2</sup> resolution including the species' point records in black.

Eight out of the sixty species of reptiles did not have the minimum of 5 records to infer their SDM with the modeling approach. In these cases, the species' potential distribution was calculated with the minimum convex polygon (MCP) between all presence point data of each species. Maps with the MCP of each of the eight species and all their occurrence point records (red dots) were created (**C**).

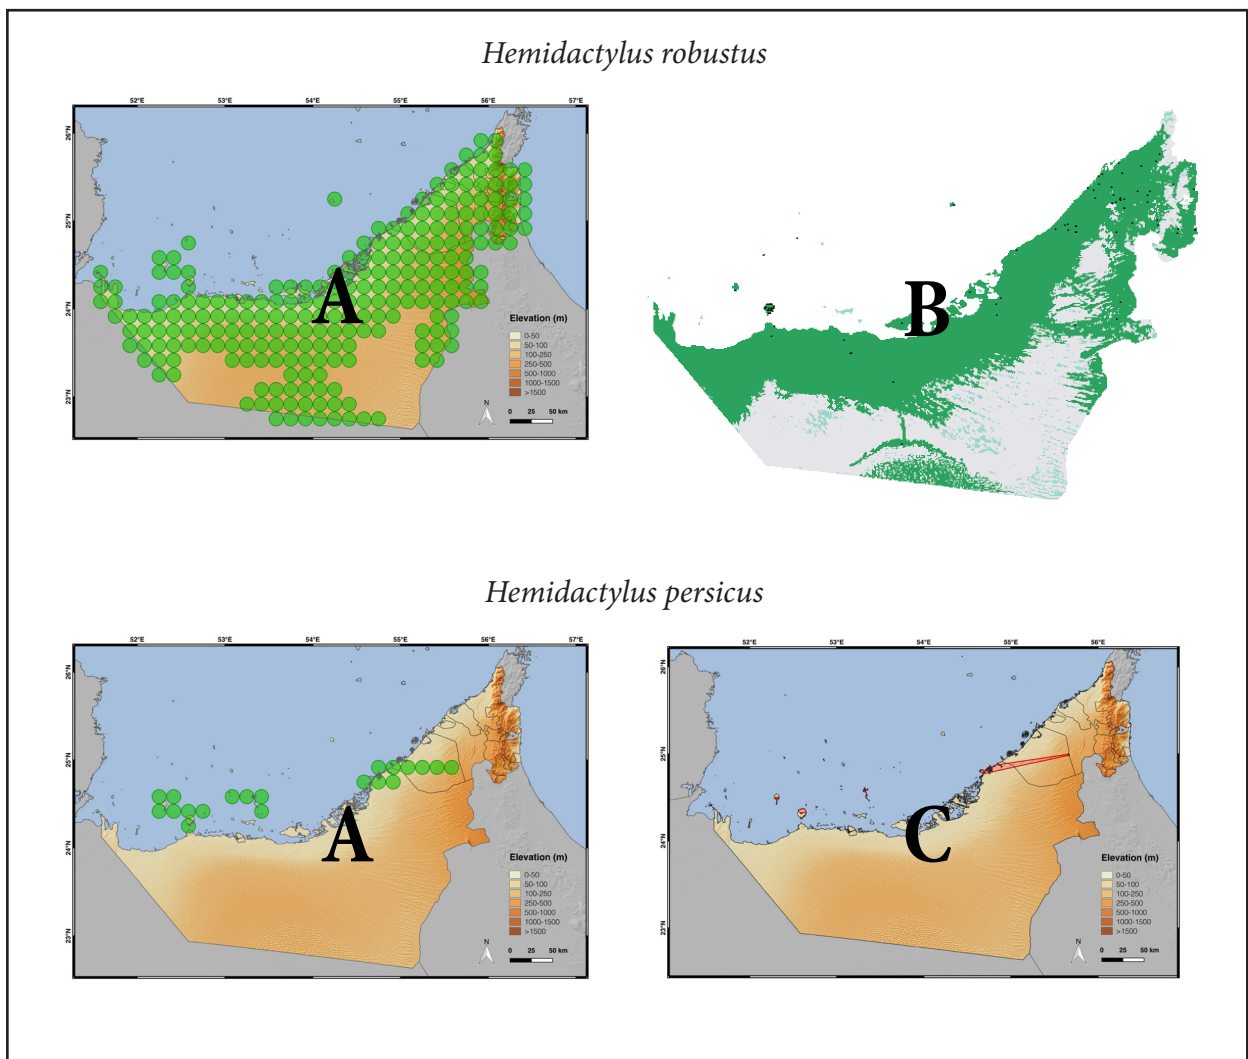

Species distribution models

*Phrynocephalus arabicus*

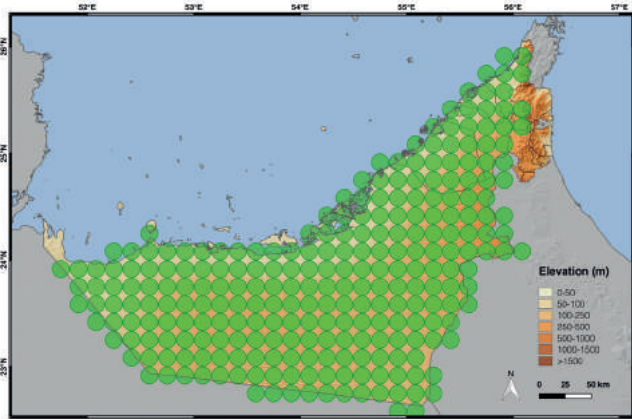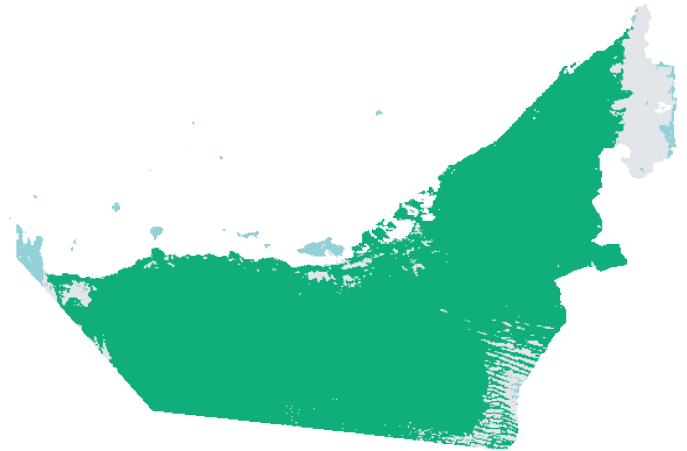

*Phrynocephalus maculatus*

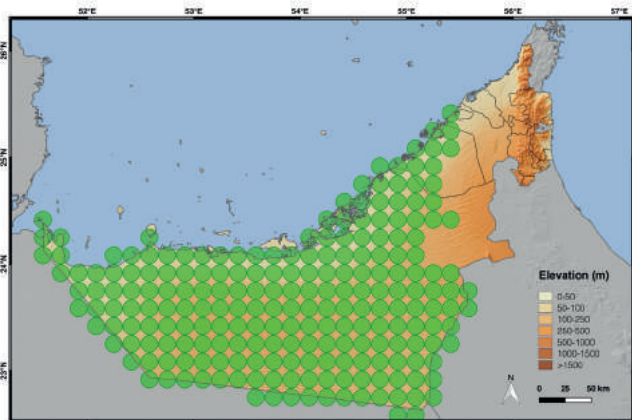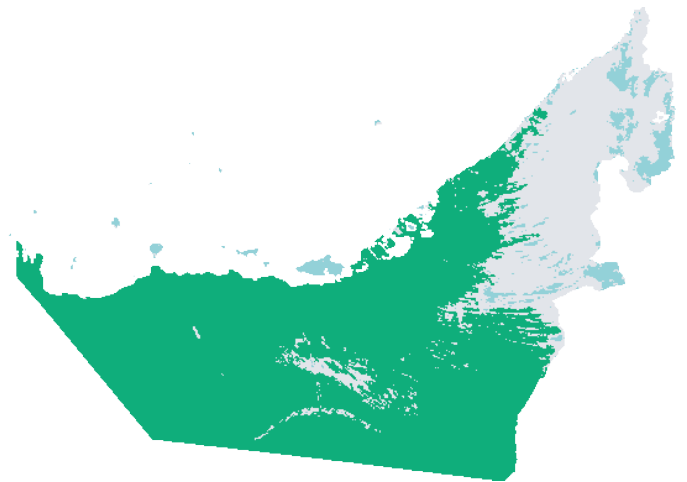

*Pseudotrapelus jensvindumi*

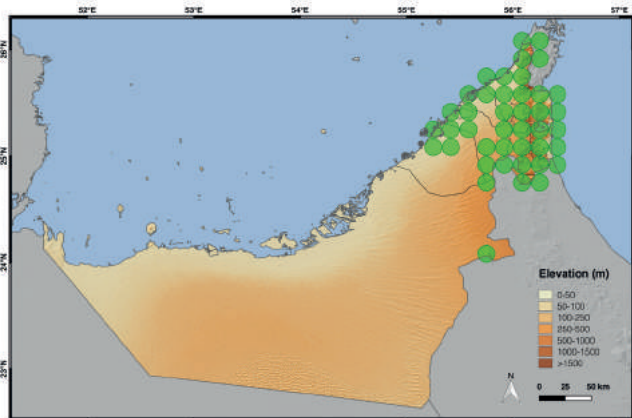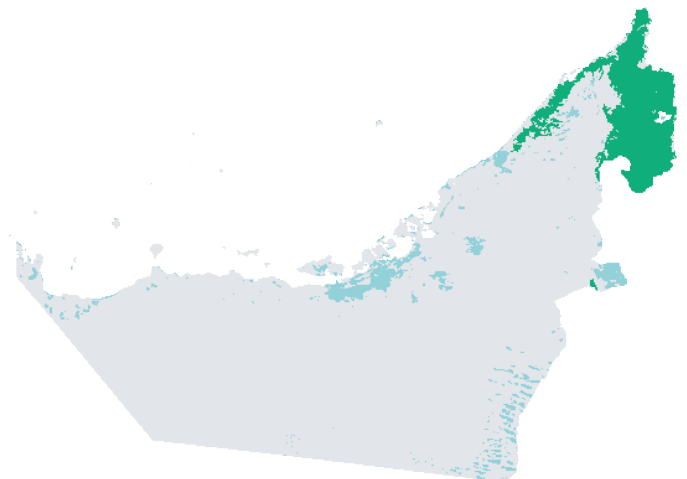

Species distribution models

*Trapelus flavimaculatus*

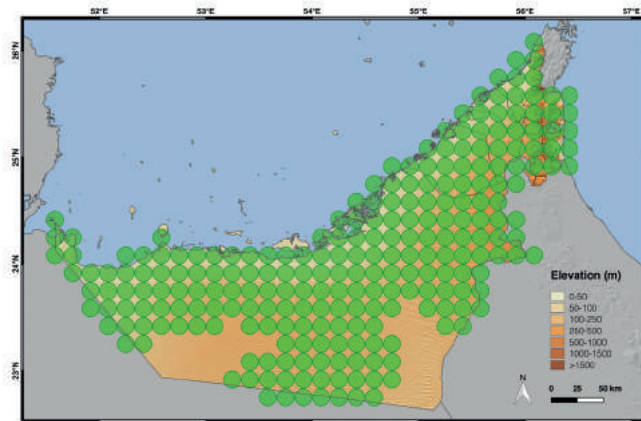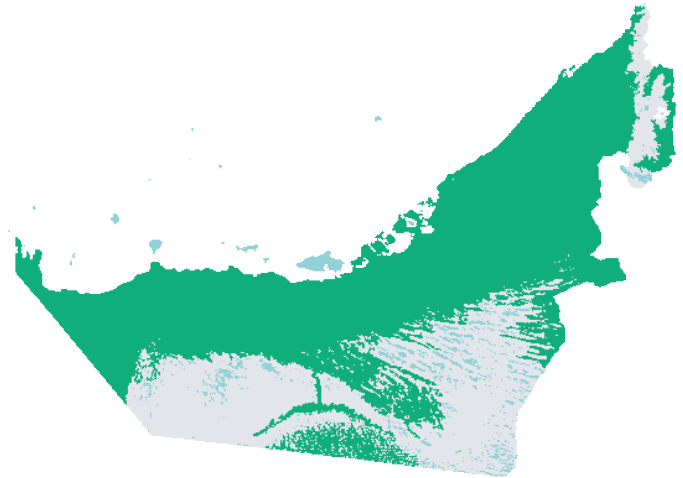

*Uromastix aegyptia lepteni*

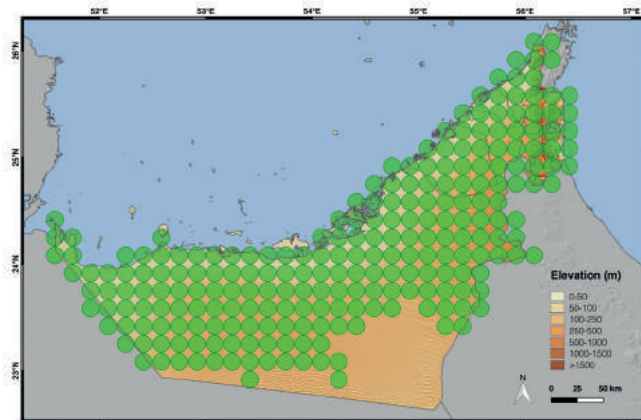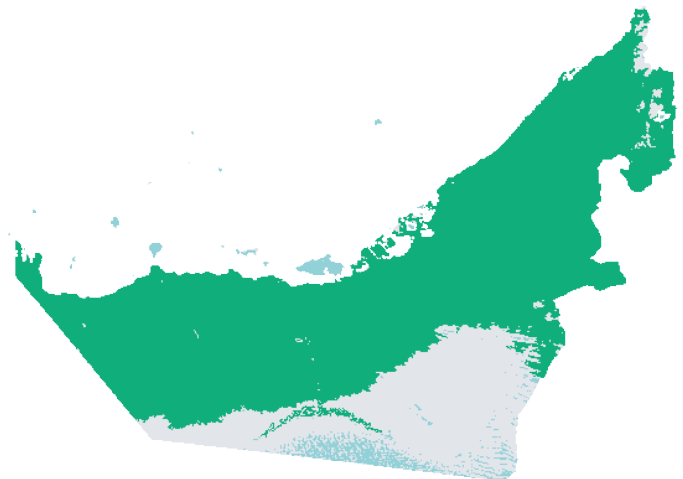

*Uromastix aegyptia microlepis*

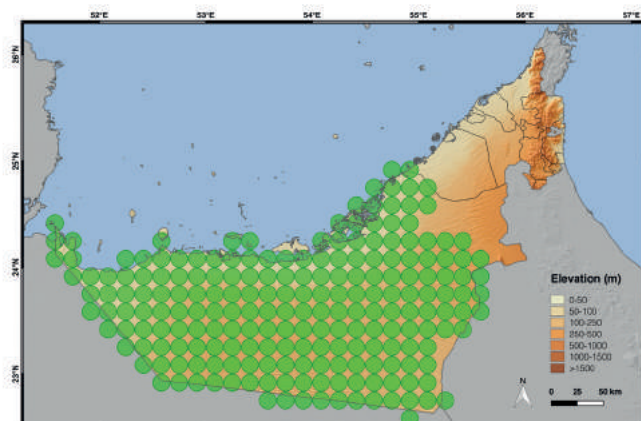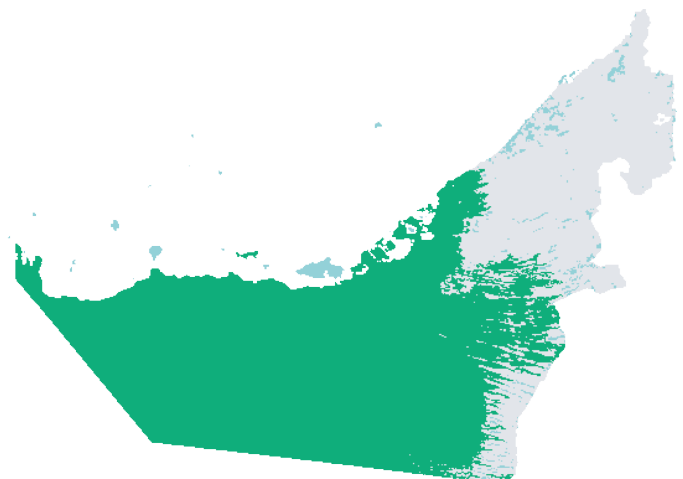



Species distribution models

*Bunopus tuberculatus*

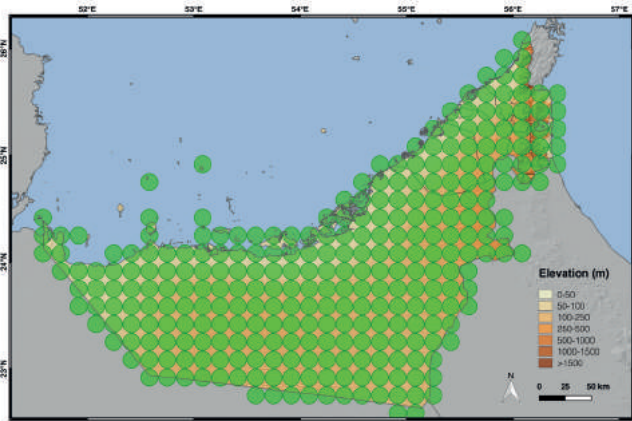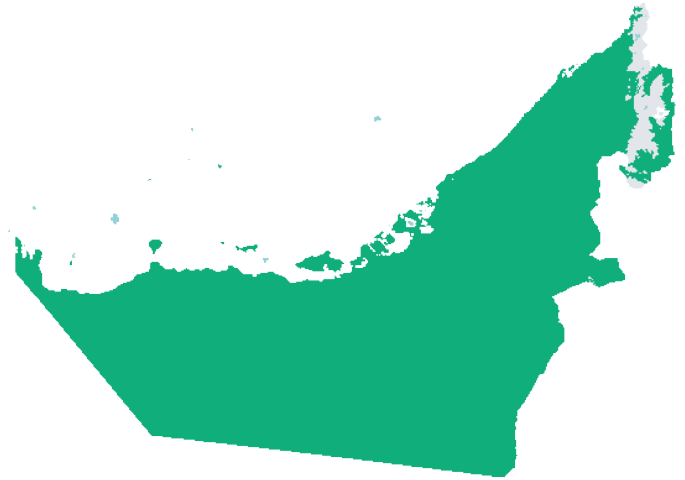

*Cyrtopodion scabrum*

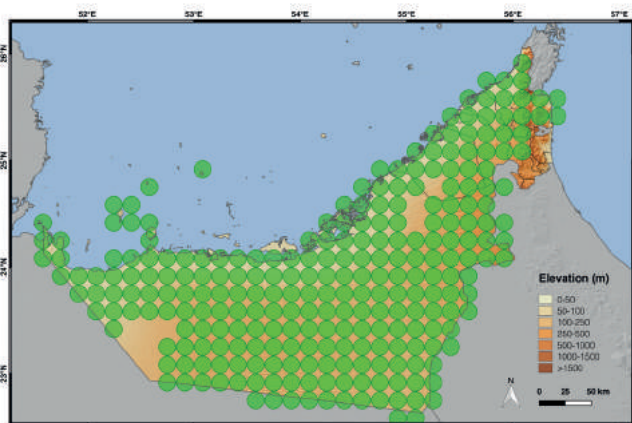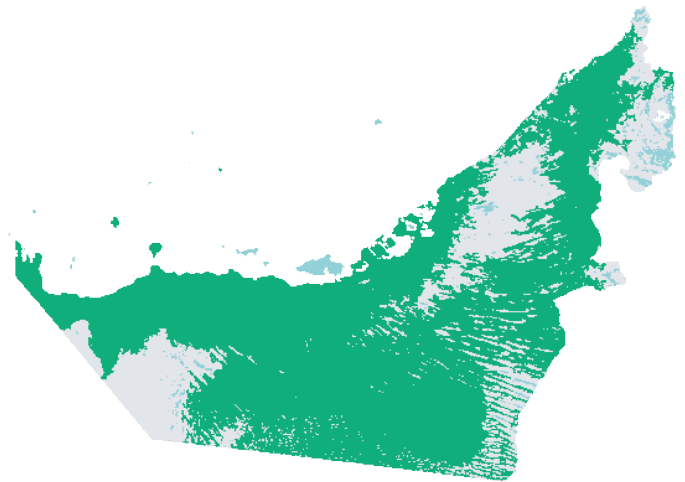

*Hemidactylus flaviviridis*

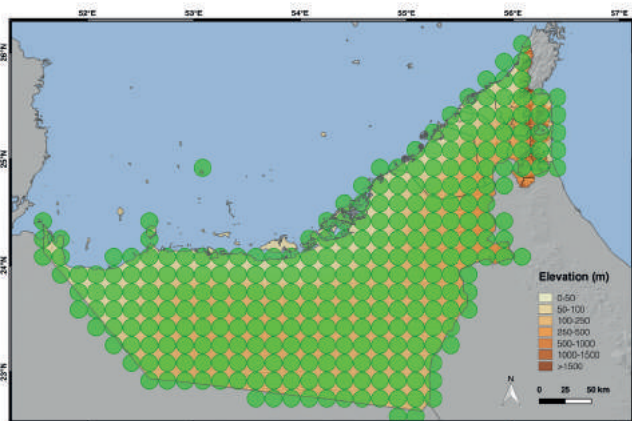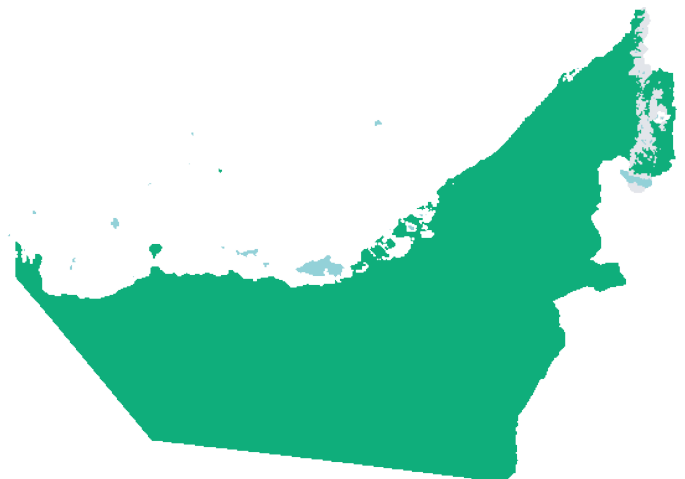

Species distribution models

*Hemidactylus persicus*

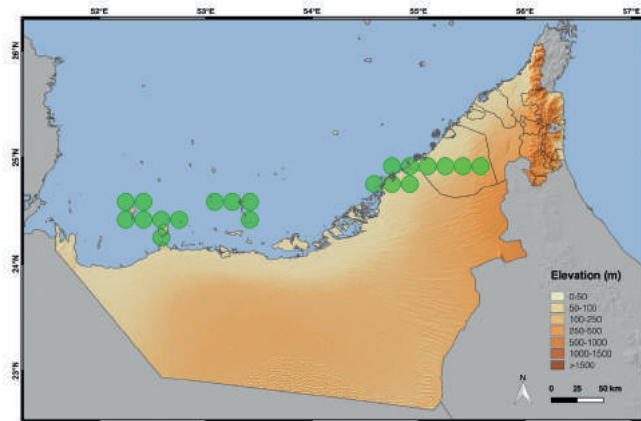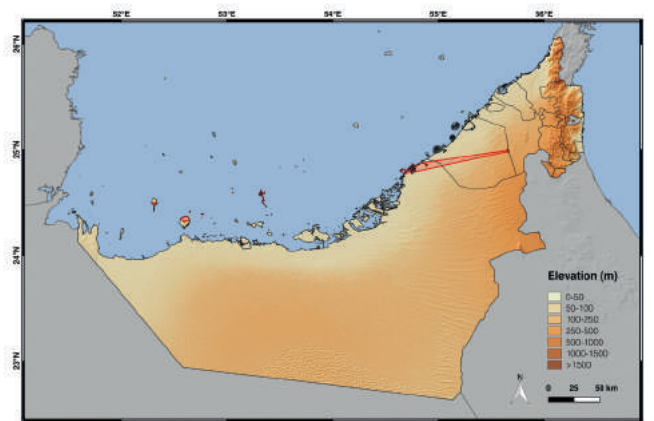

*Hemidactylus robustus*

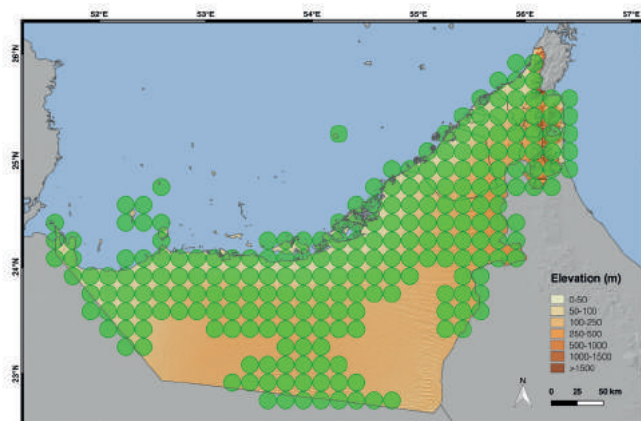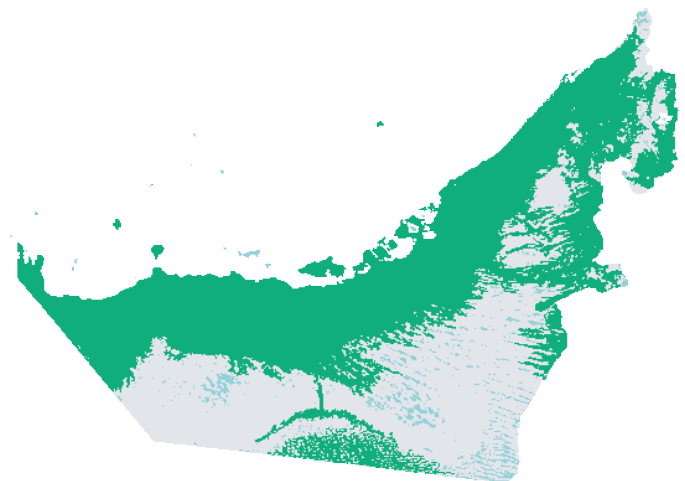

*Pseudoceramodactylus khobarensis*

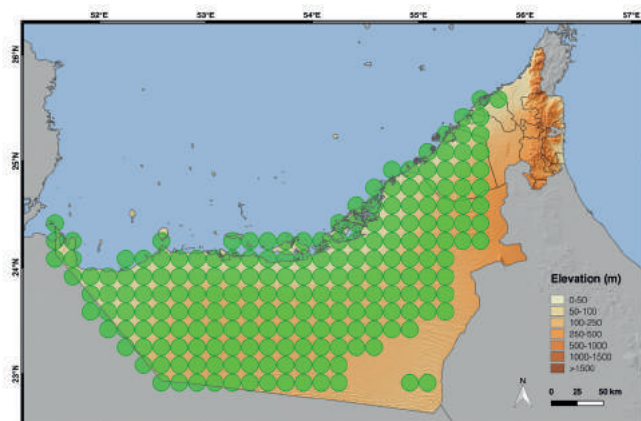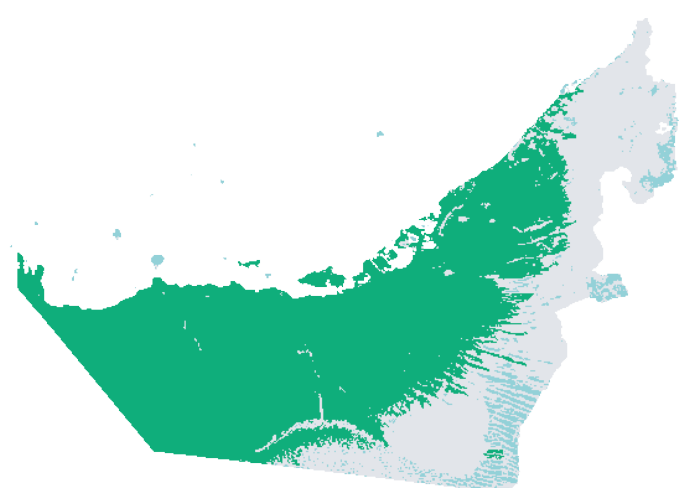

Species distribution models

*Stenodactylus arabicus*

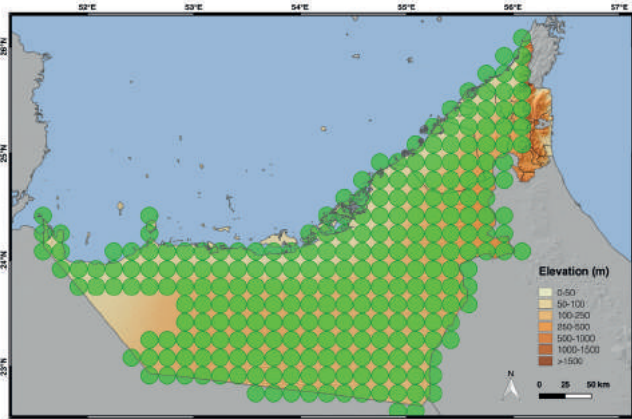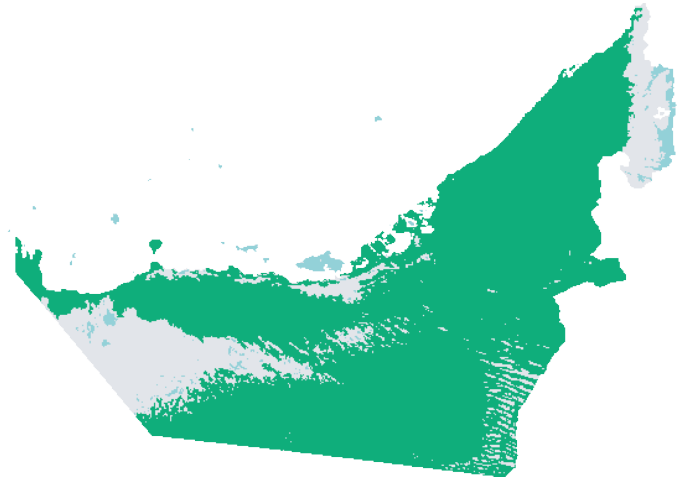

*Stenodactylus doriae*

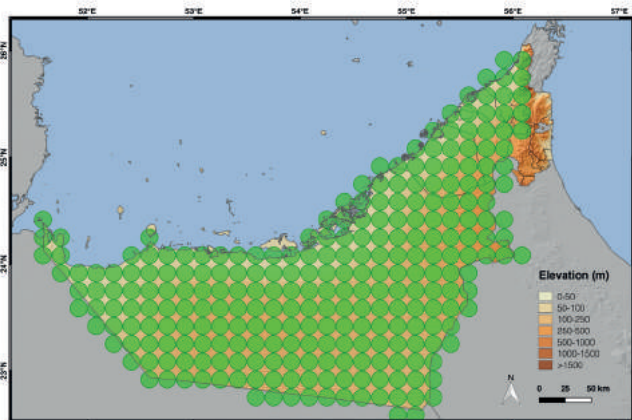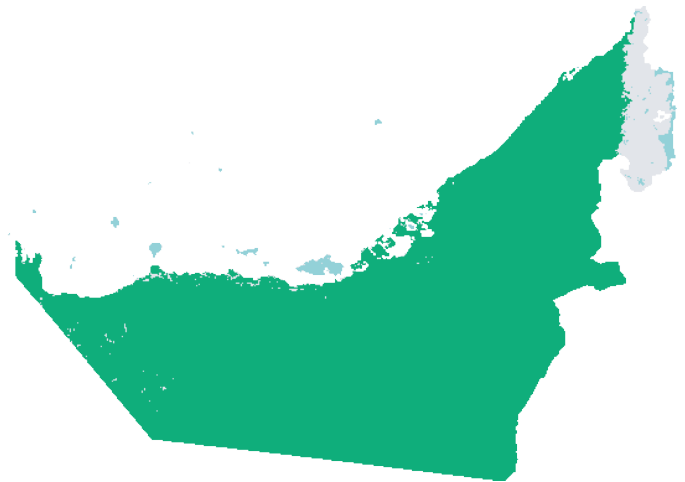

*Stenodactylus leptocosymbotes*

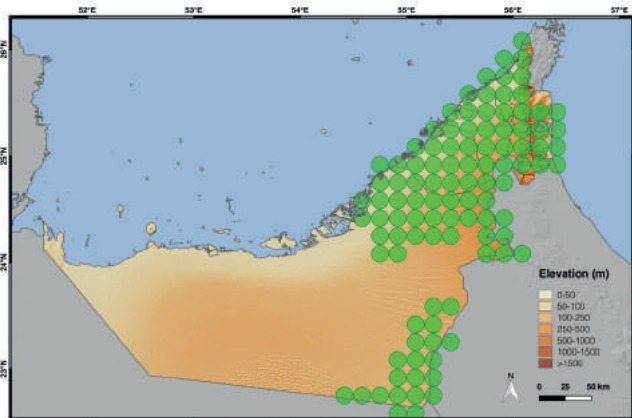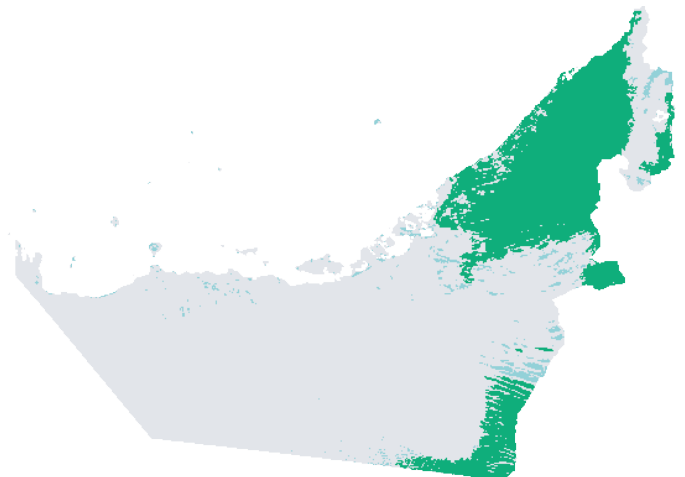

Species distribution models

*Stenodactylus slevini*

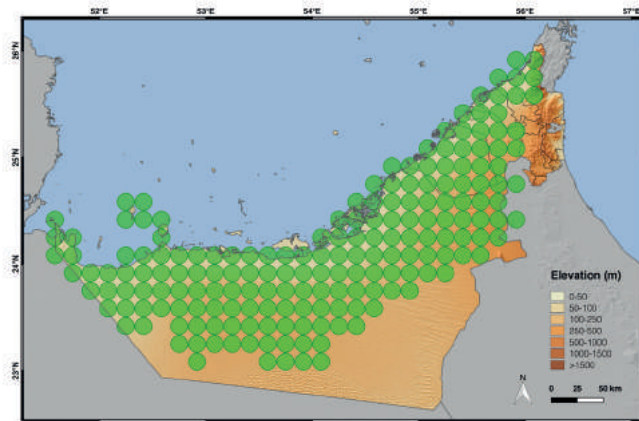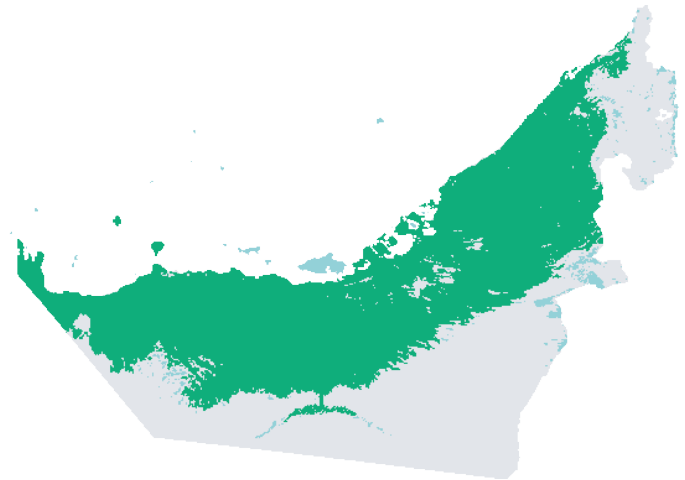

*Trachydactylus hajarensis*

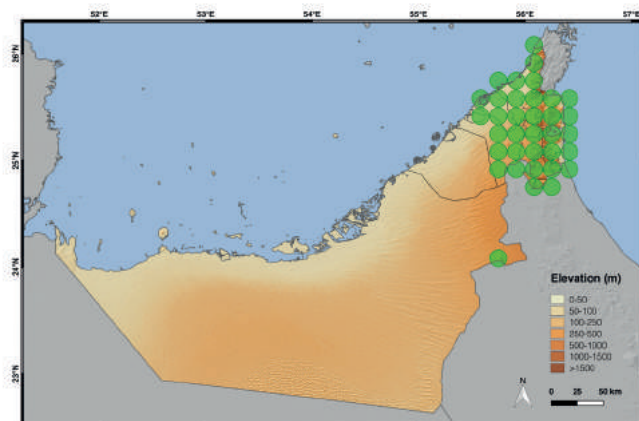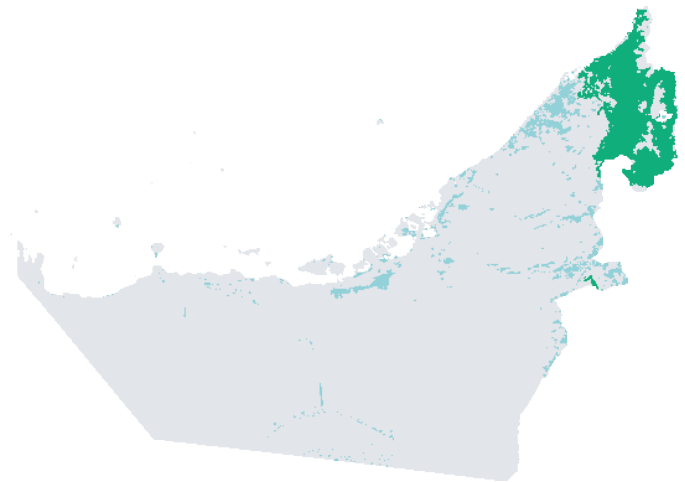

*Asaccus caudivolvulus*

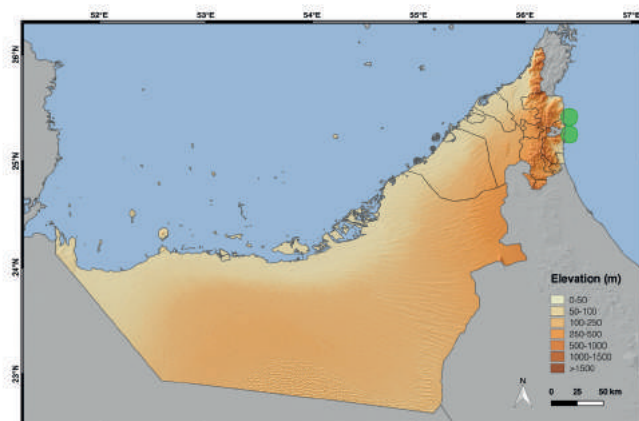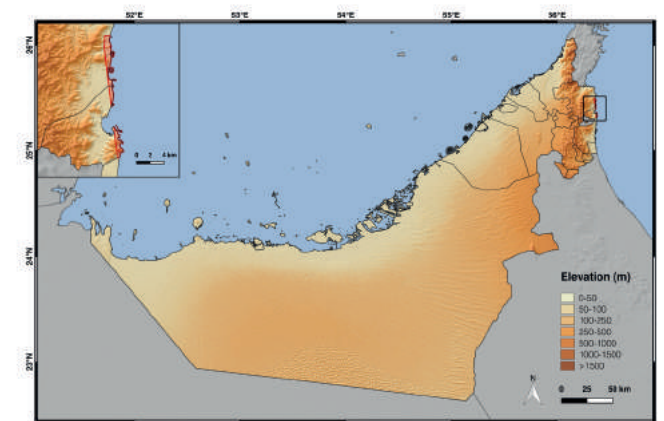

Species distribution models

*Asaccus gallagheri*

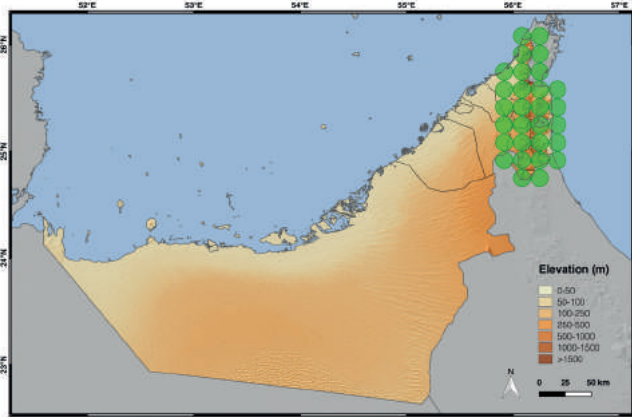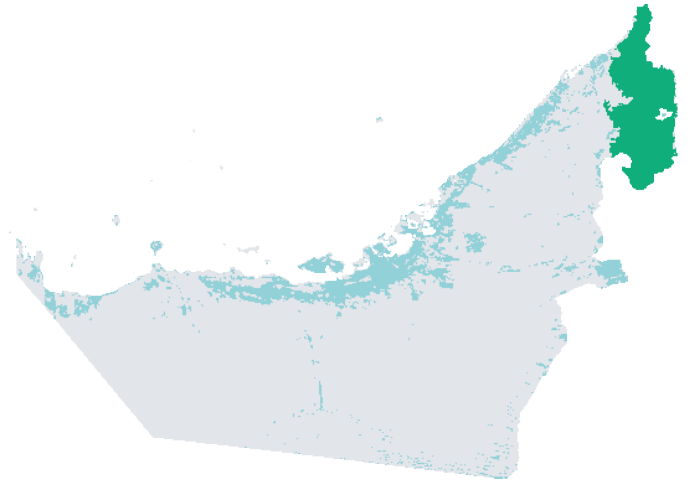

*Asaccus gardneri*

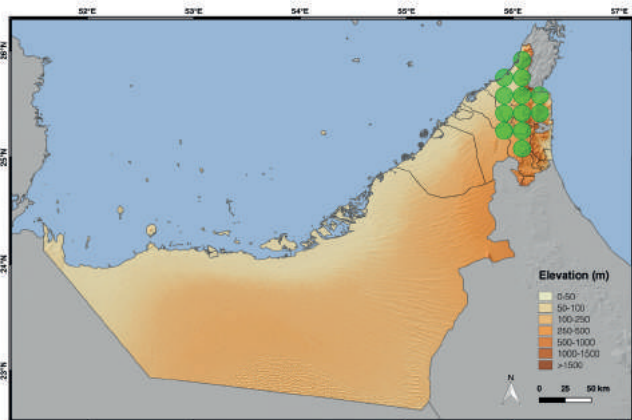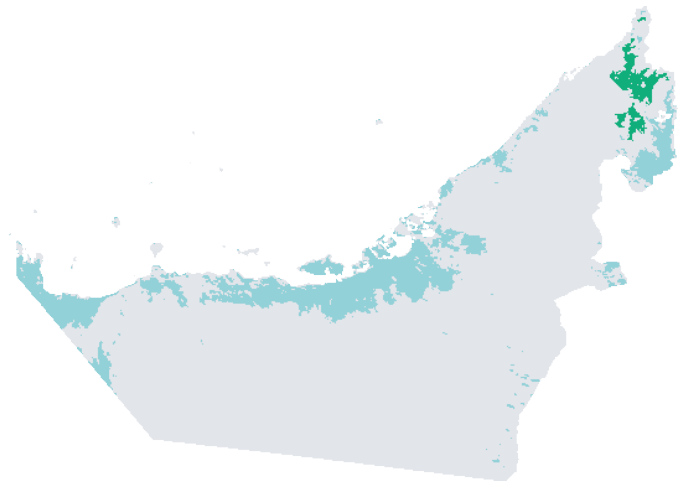

*Asaccus margaritae*

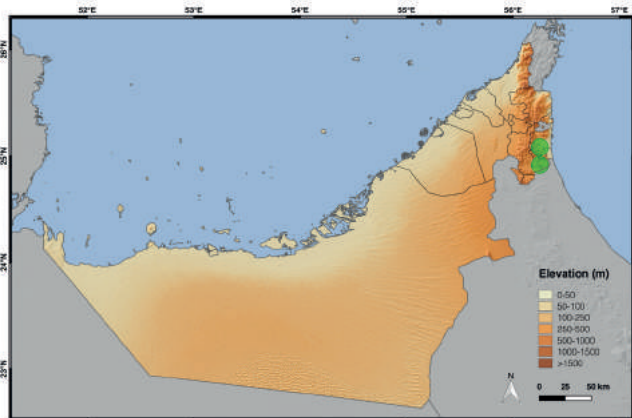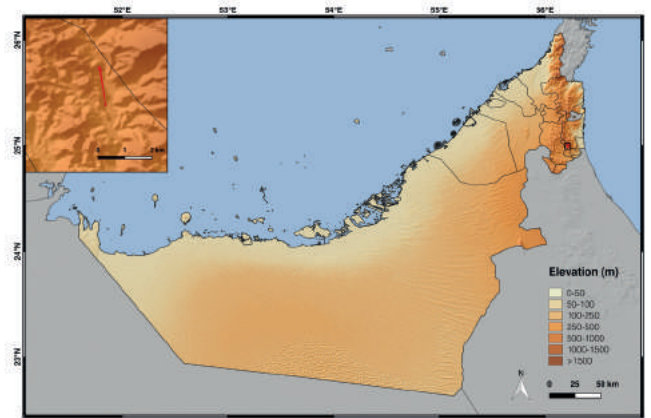

Species distribution models

*Ptyodactylus orlovi*

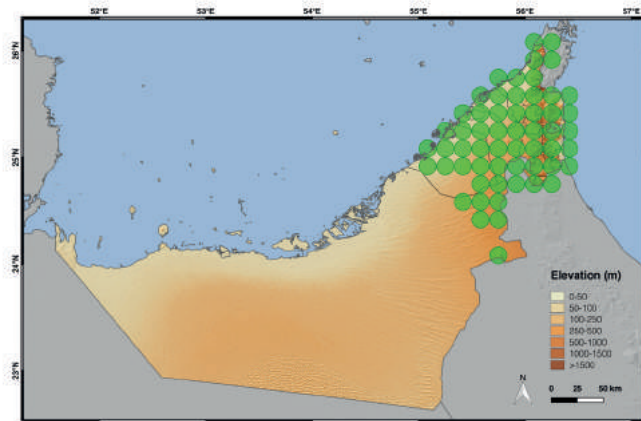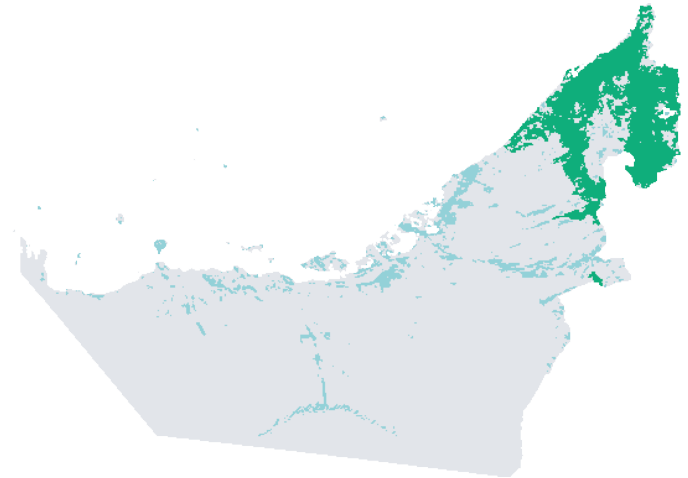

*Ptyodactylus ruusaljibalicus*

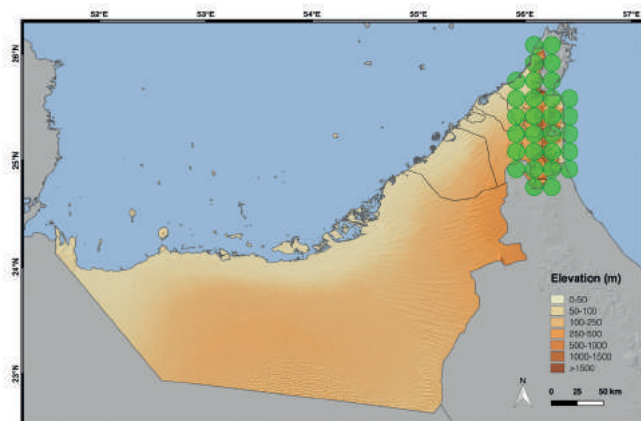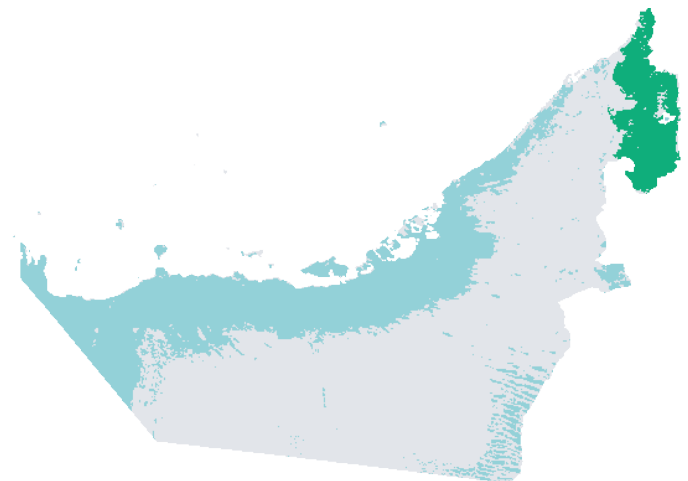

*Pristurus carteri*

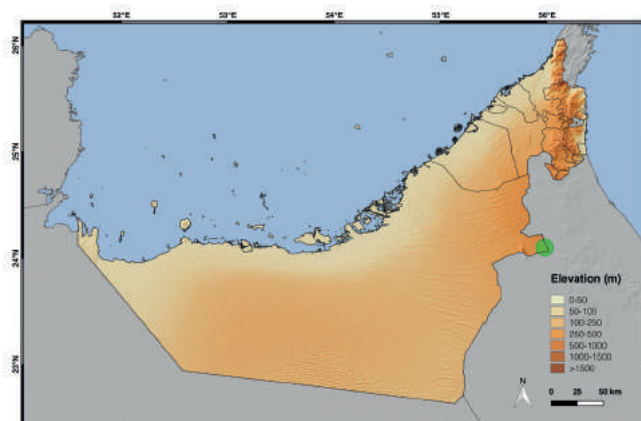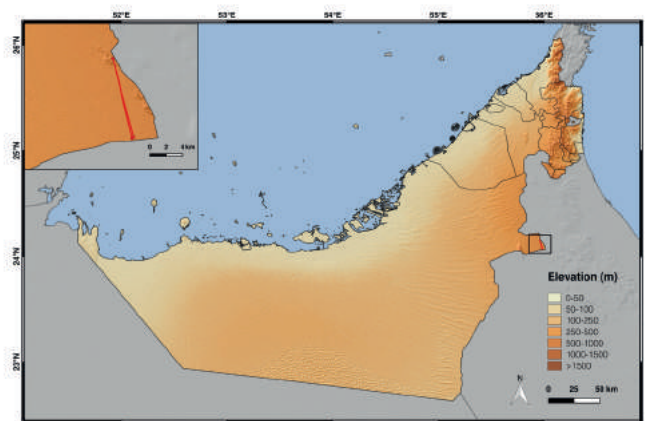

S69: Species distribution models

*Pristurus celerrimus*

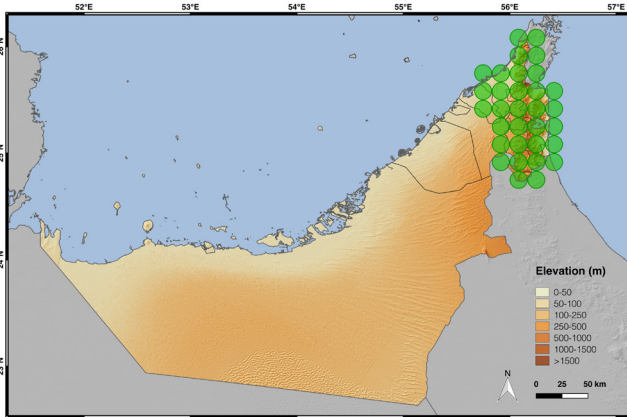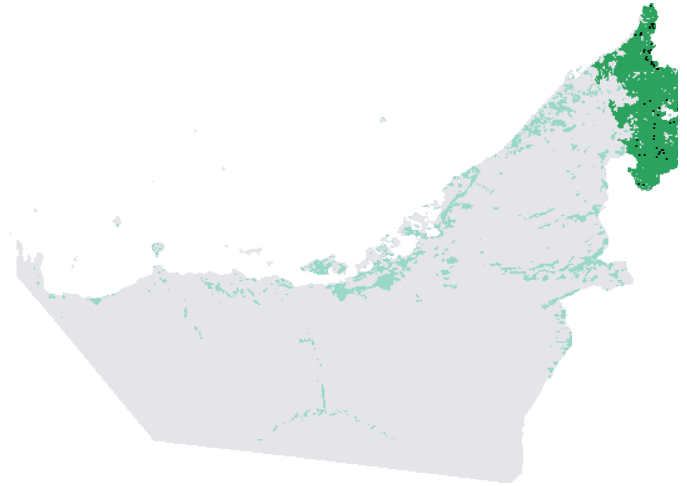

*Pristurus minimus*

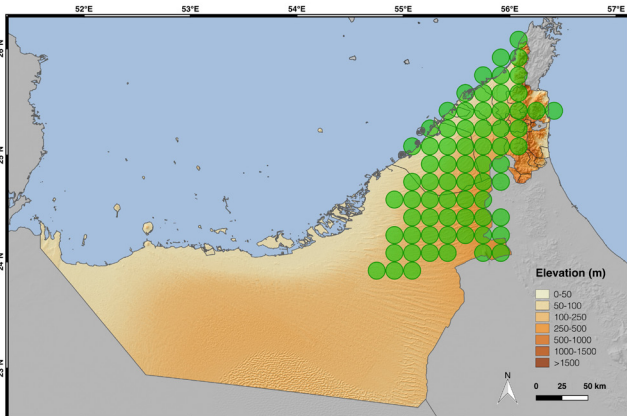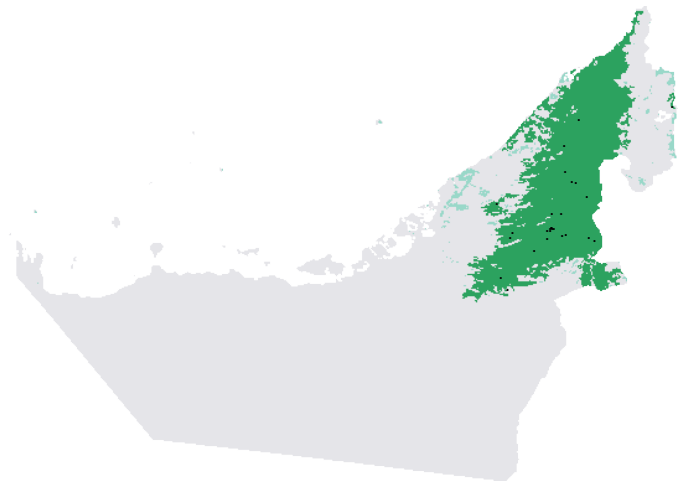

*Pristurus rupestris*-sp. 3

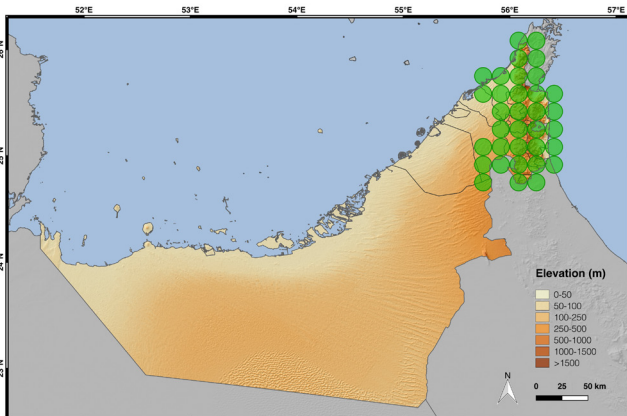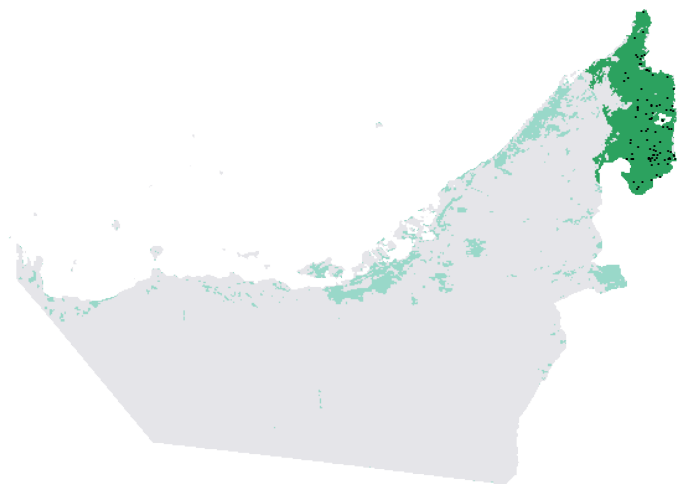

S70: Species distribution models

*Teratoscincus keyserlingii*

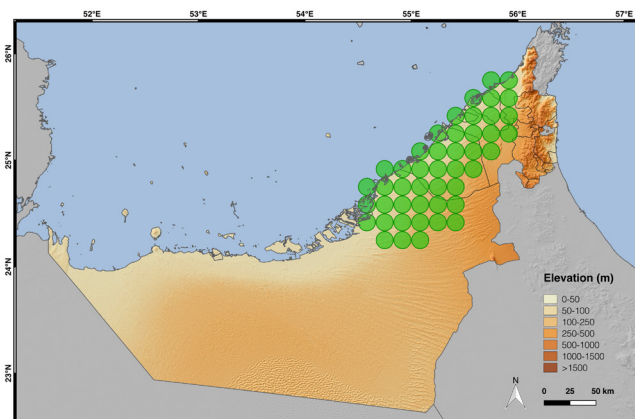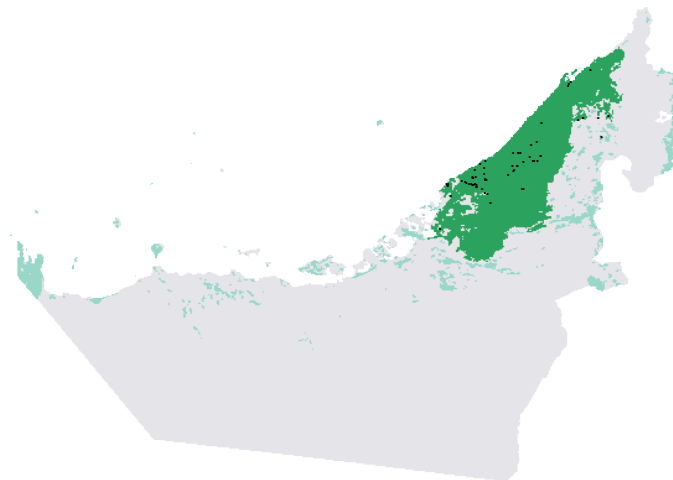

*Acanthodactylus blanfordii*

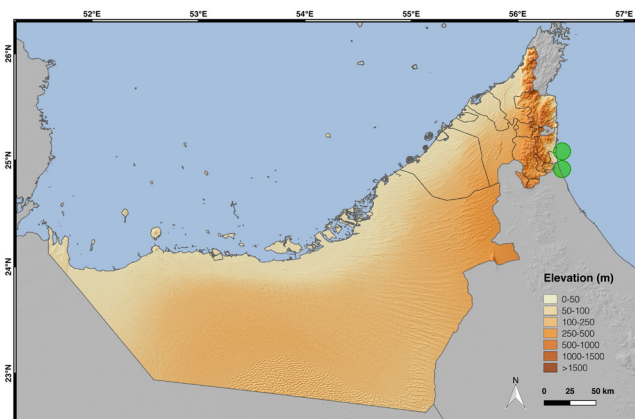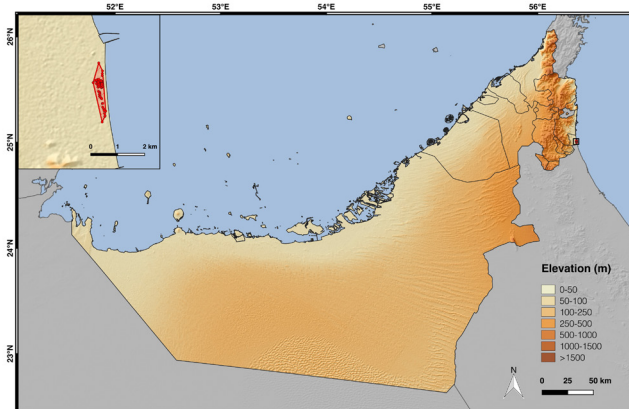

*Acanthodactylus boskianus asper*

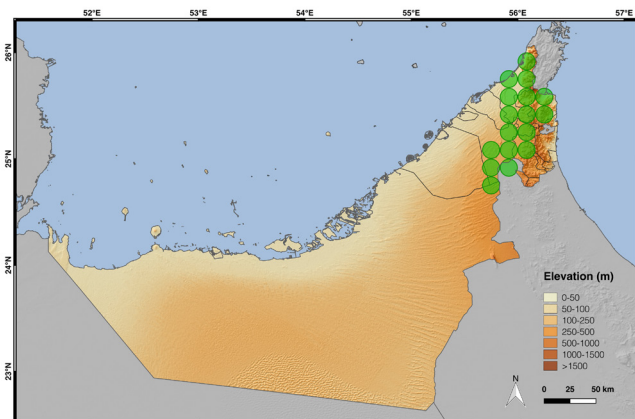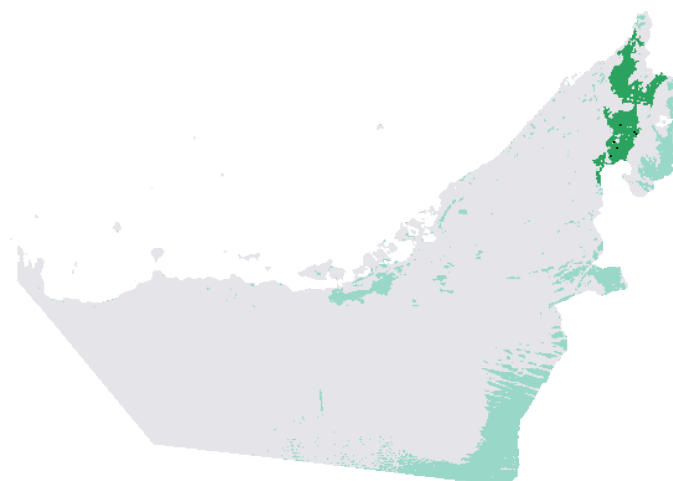



Species distribution models

*Acanthodactylus gongrorhynchatus*

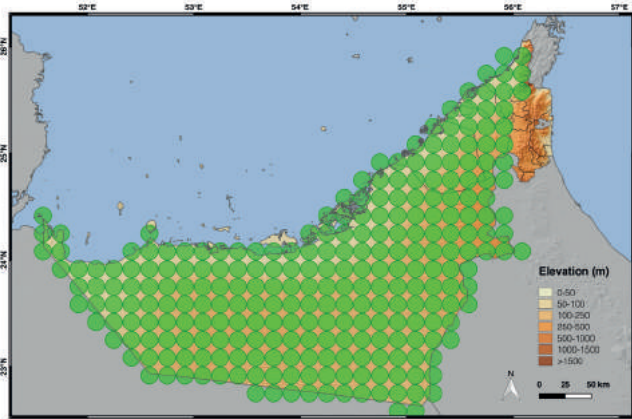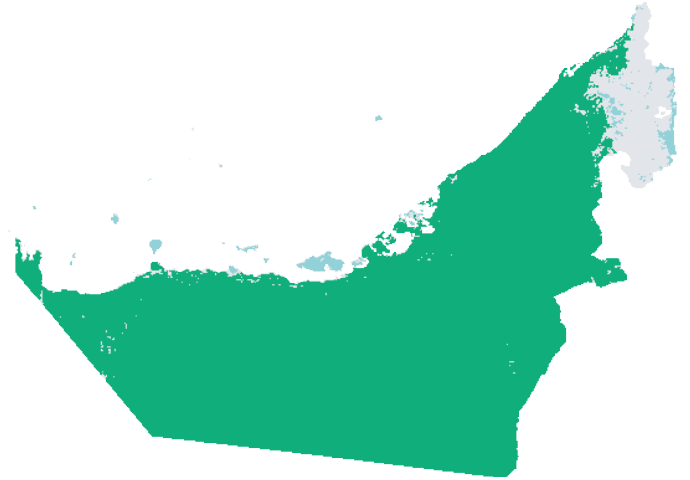

*Acanthodactylus haasi*

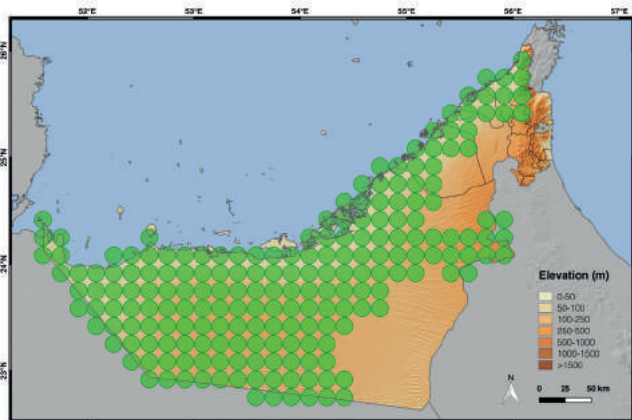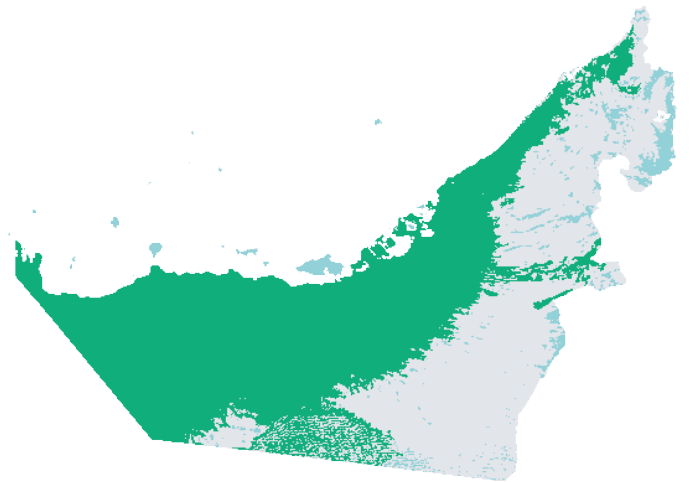

*Acanthodactylus ophiodorus*

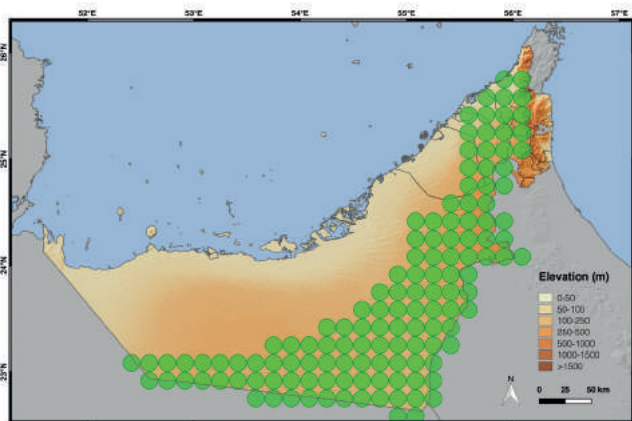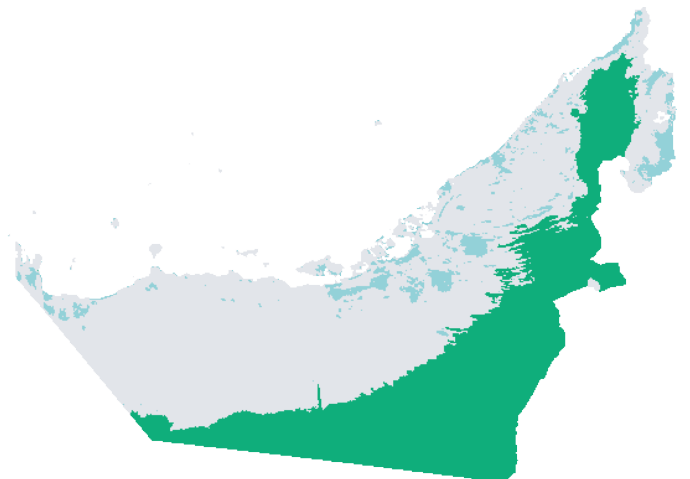

Species distribution models

*Acanthodactylus schmidti*

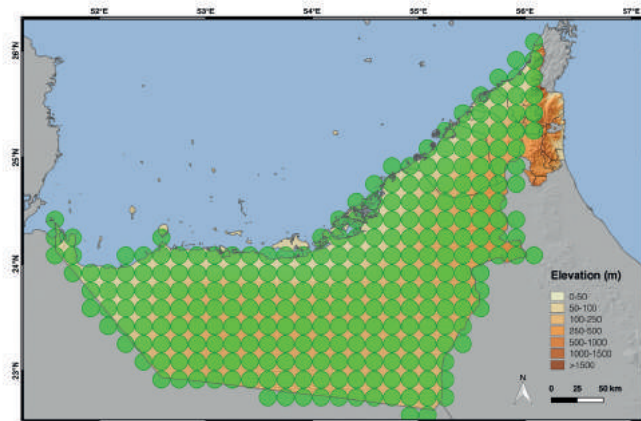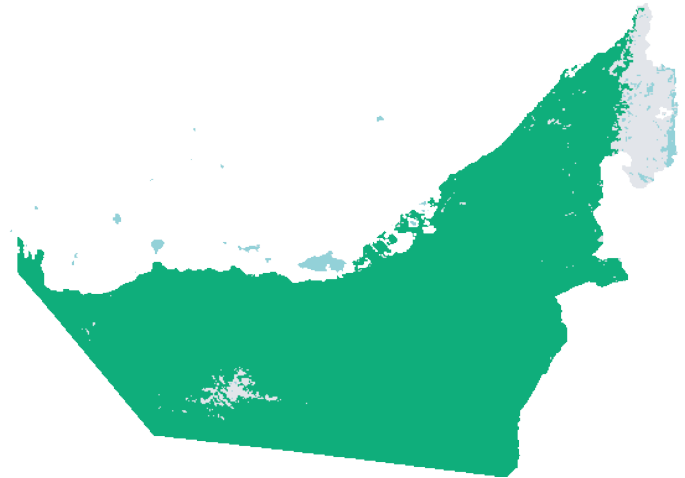

*Mesalina adramitana*

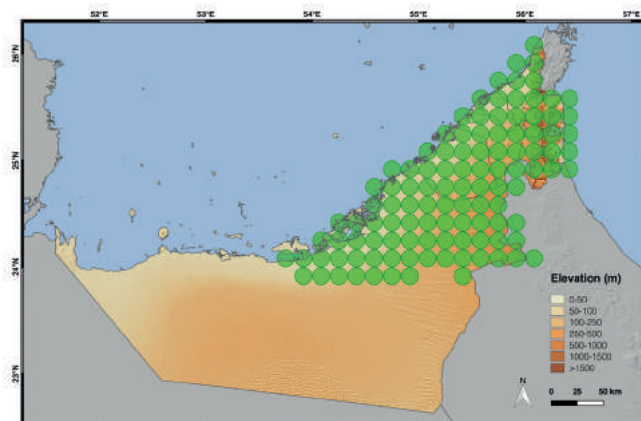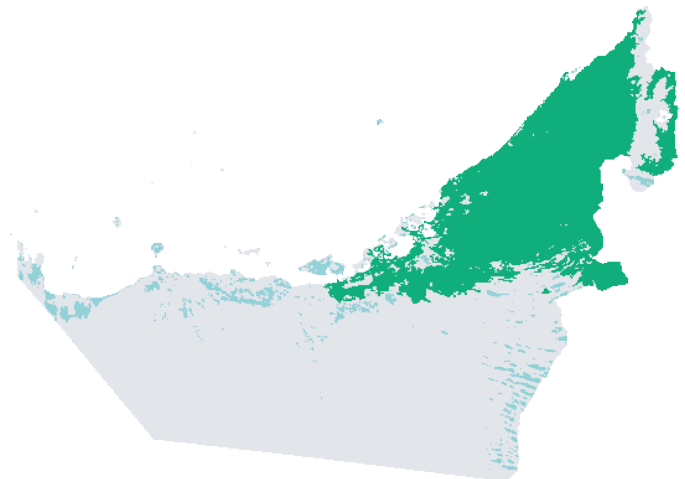

*Mesalina brevisrostris*

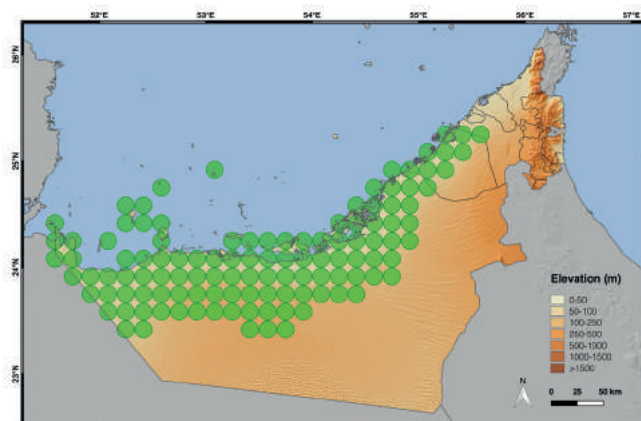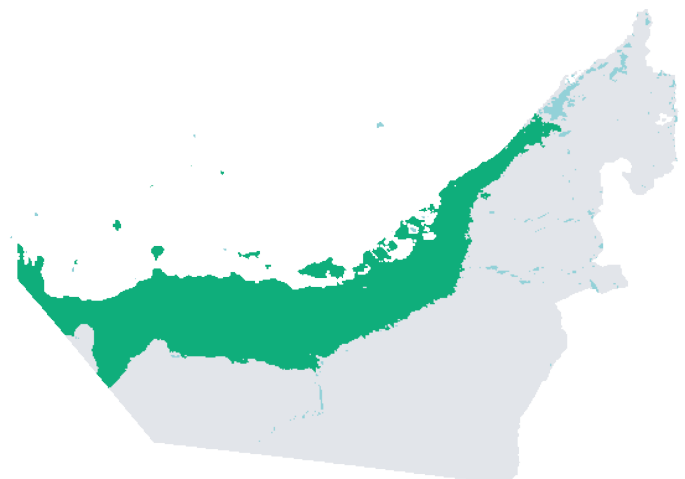

Species distribution models

*Omanosaura cyanura*

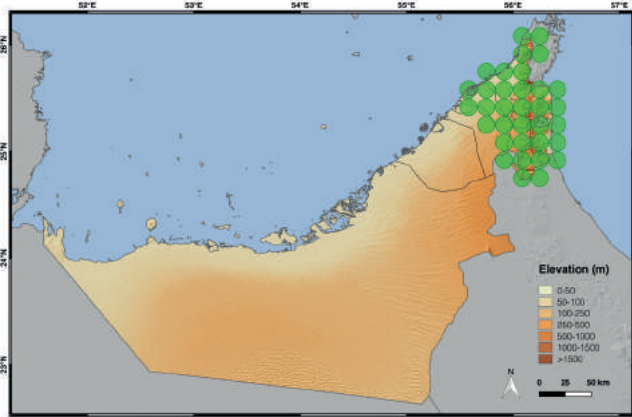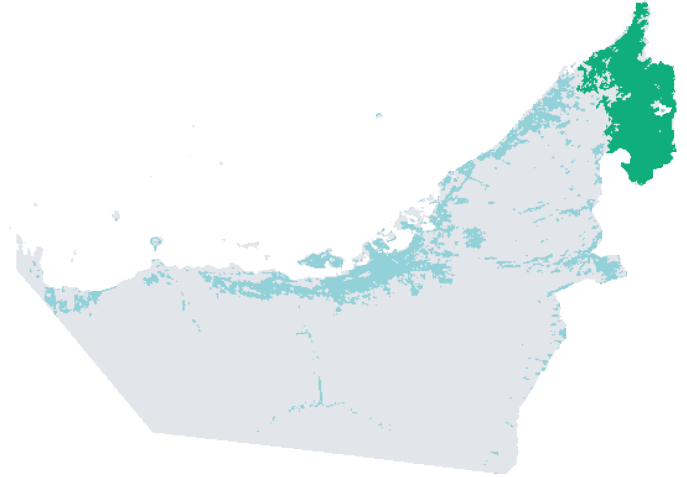

*Omanosaura jayakari*

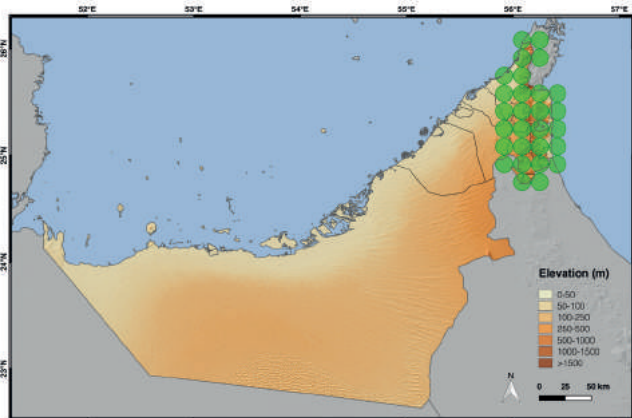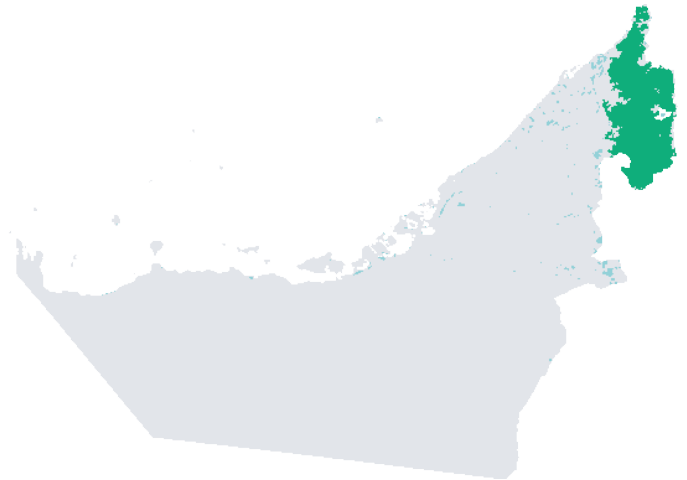

*Ablepharus pannonicus*

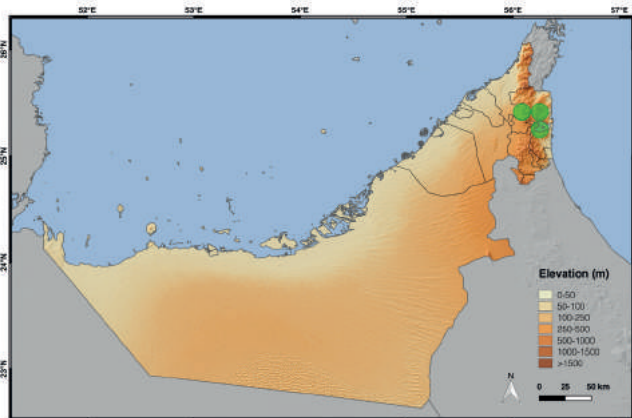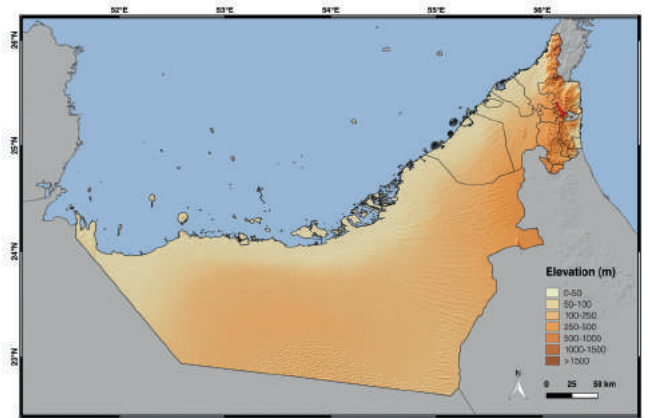

Species distribution models

*Chalcides ocellatus ocellatus*

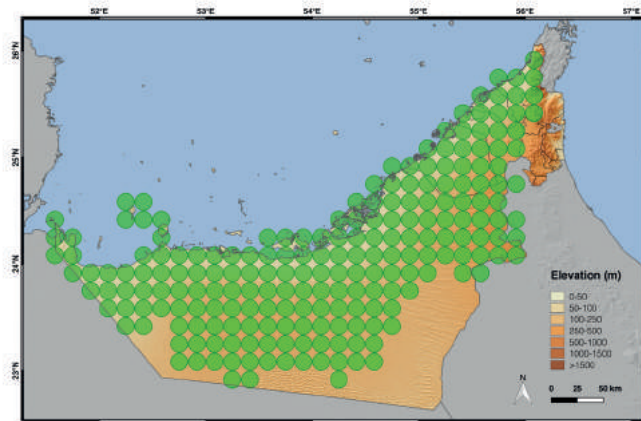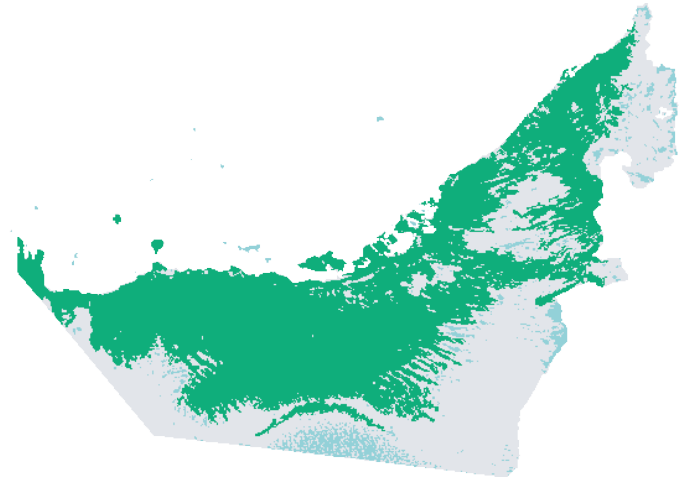

*Heremites septemtaeniatus*

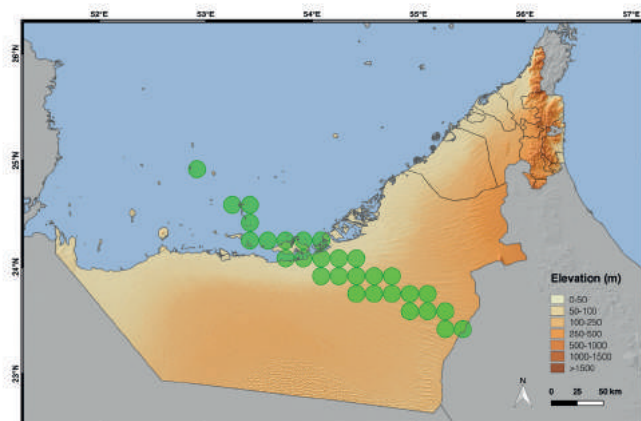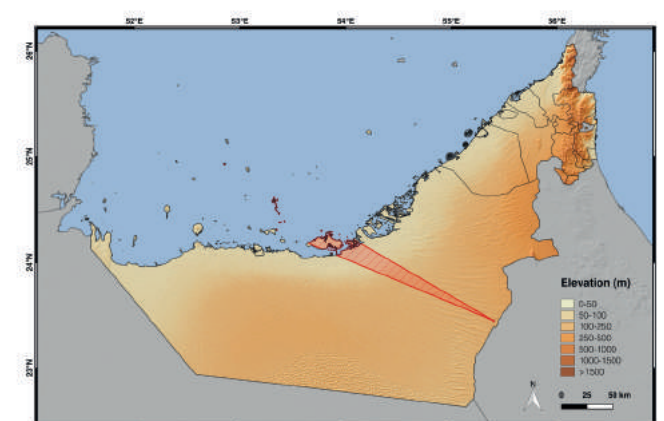

*Scincus mitranus*

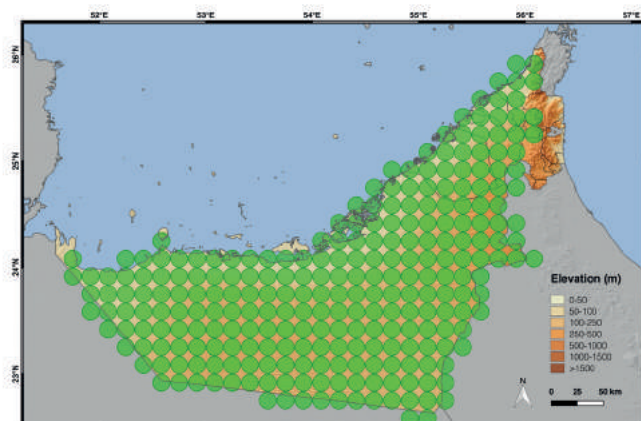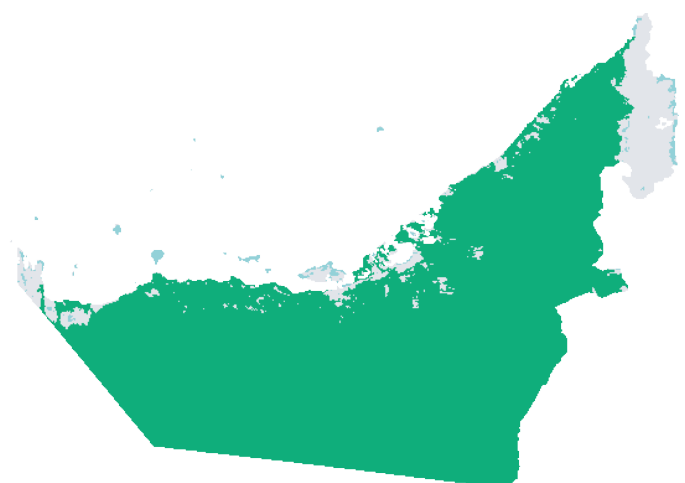

Species distribution models

*Scincus scincus conirostris*

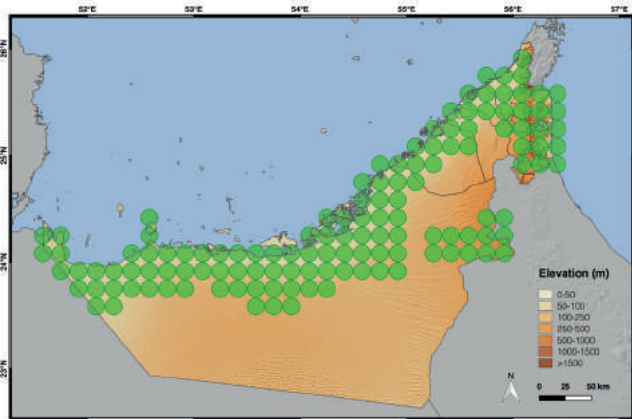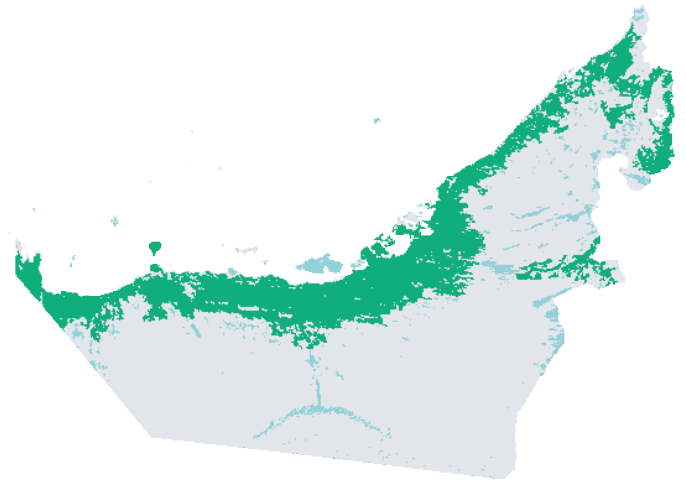

*Trachylepis tessellata*

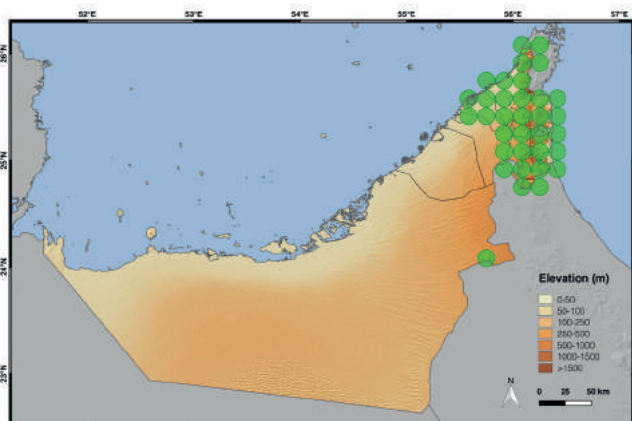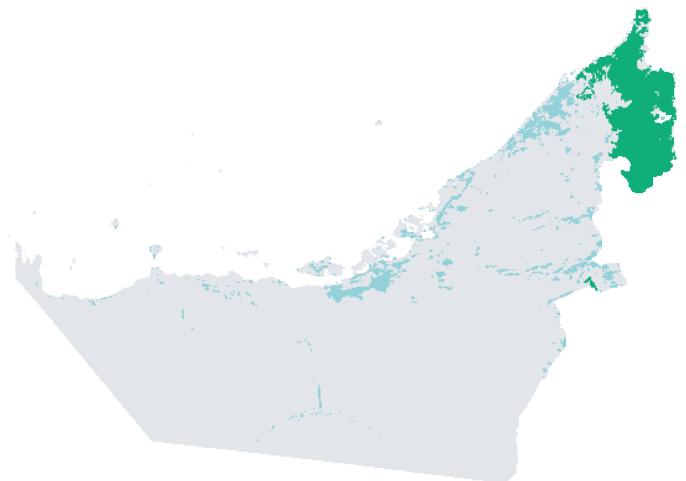

*Diplometopon zarudnyi*

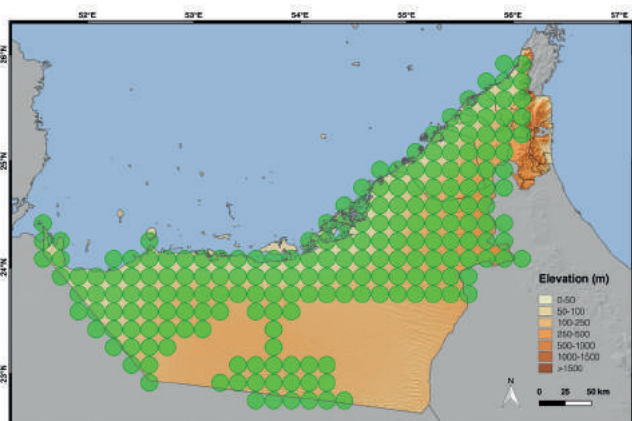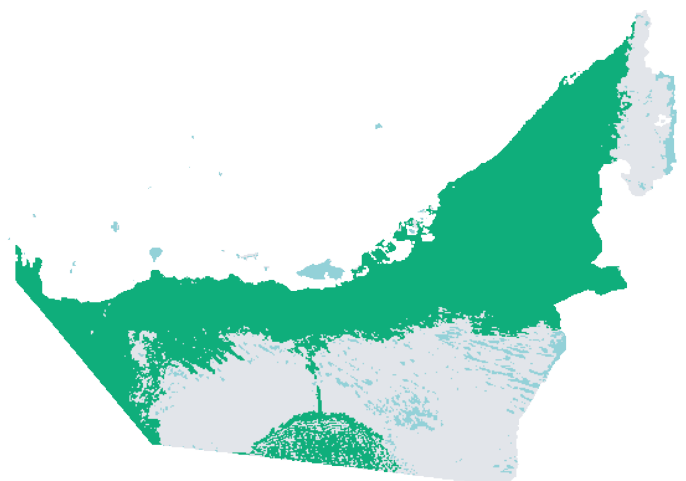

S76: Species distribution models

*Varanus griseus griseus*

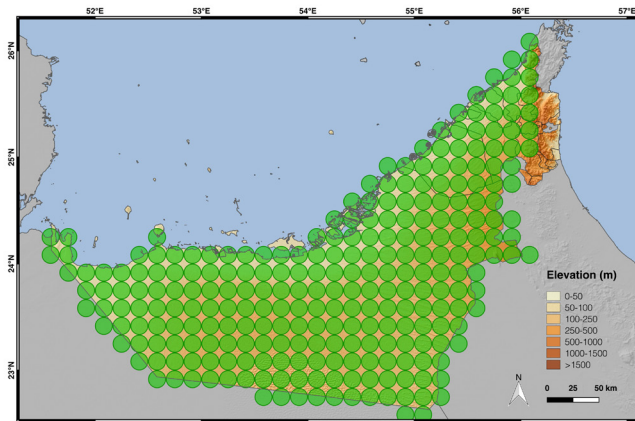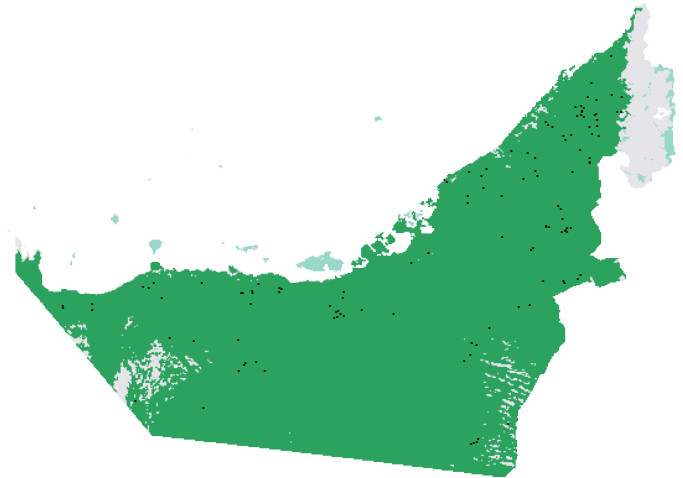

*Eryx jayakari*

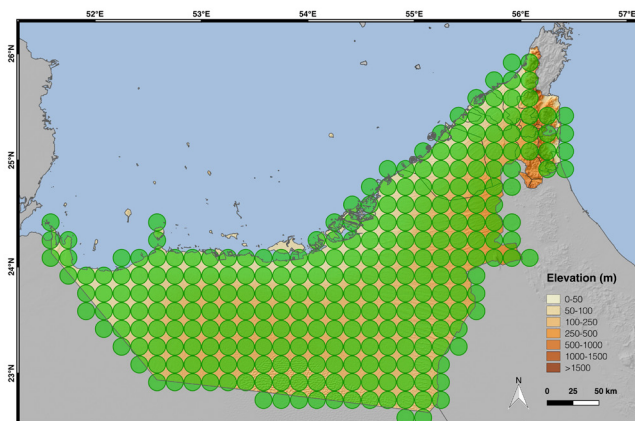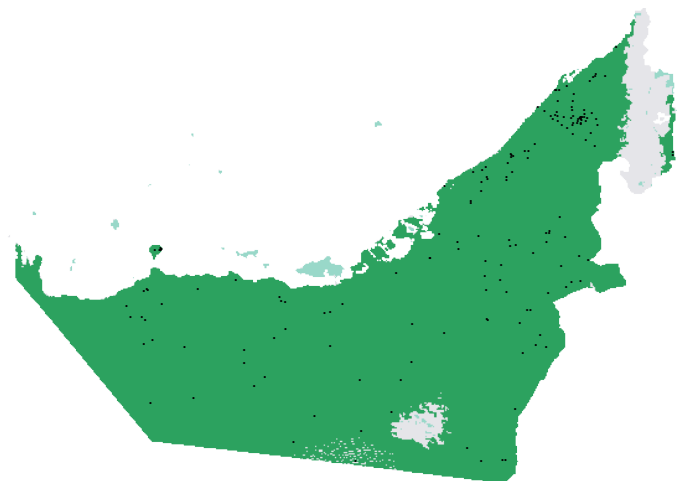

*Lytorhynchus diadema diadema*

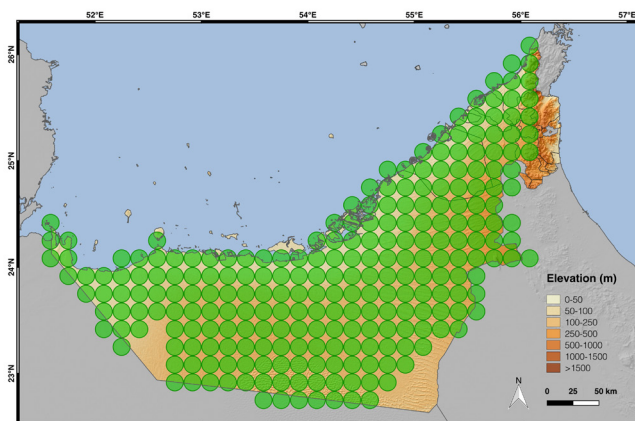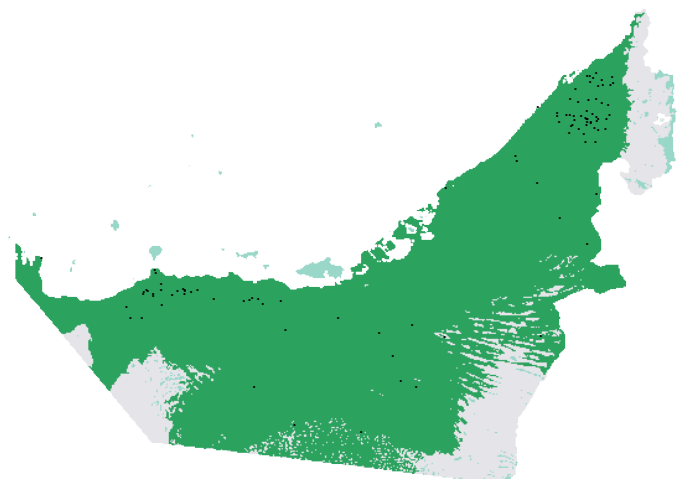

Species distribution models

*Platyceps rhodorachis rhodorachis*

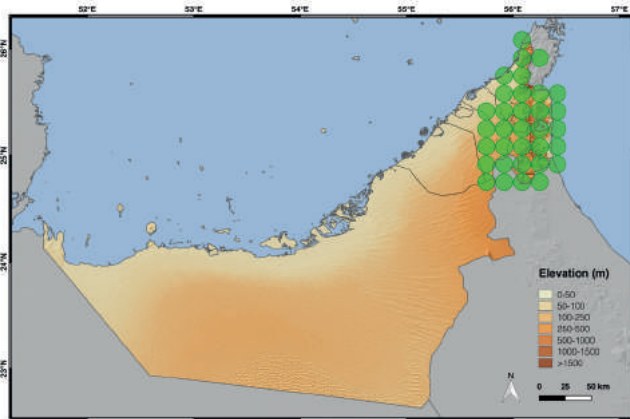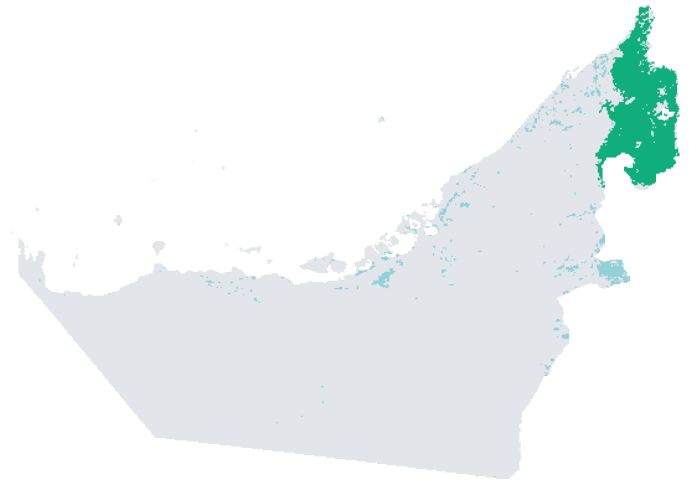

*Platyceps ventromaculatus*

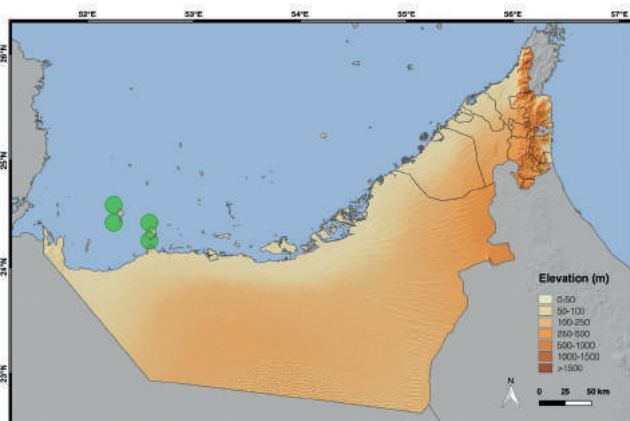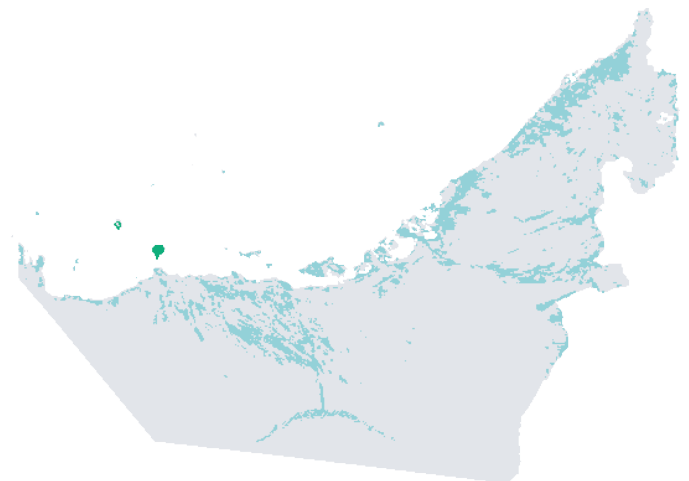

*Spalerosophis diadema cliffordii*

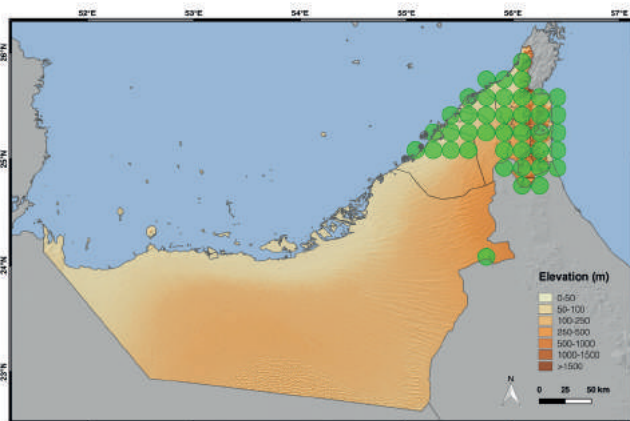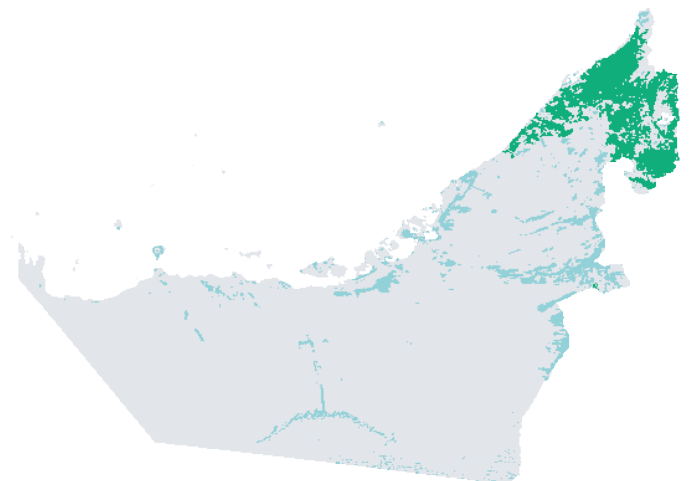

Species distribution models

*Telescopus dhara dhara*

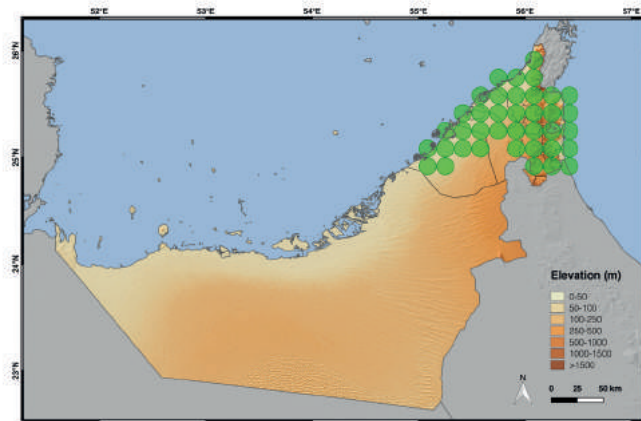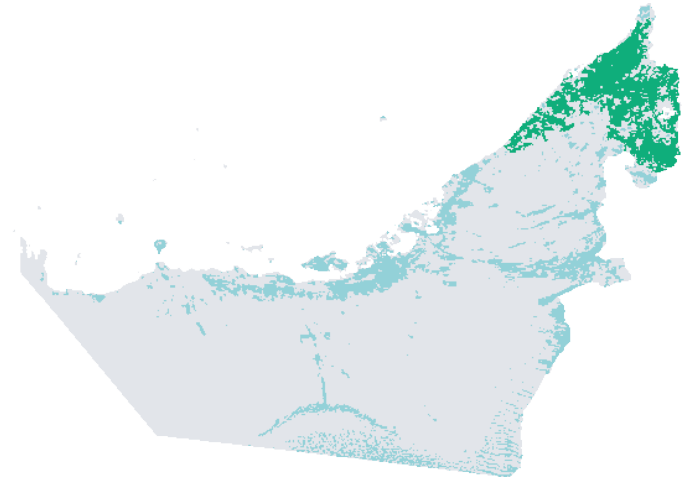

*Psammophis schokari*

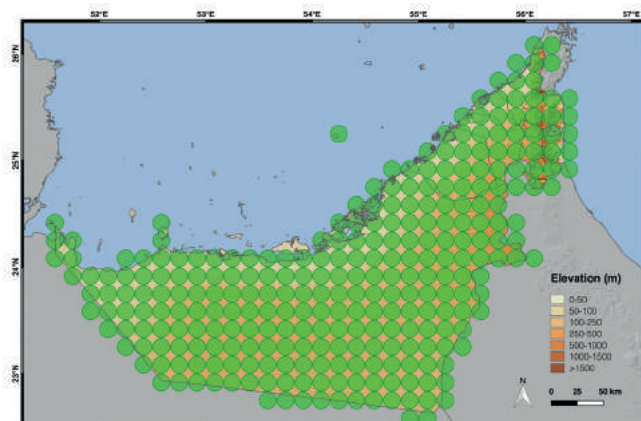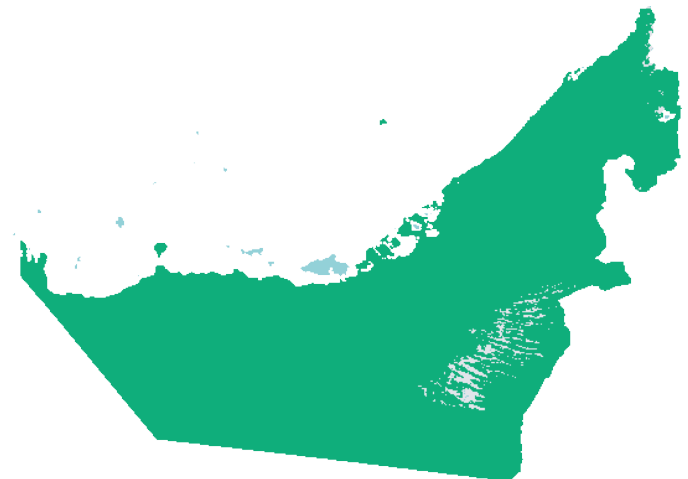

*Rhagerhis moilensis*

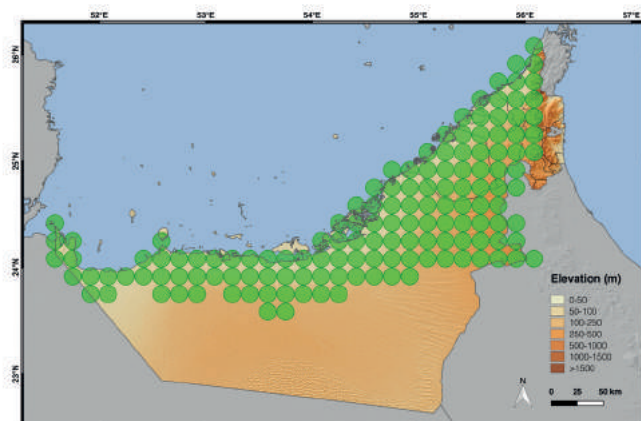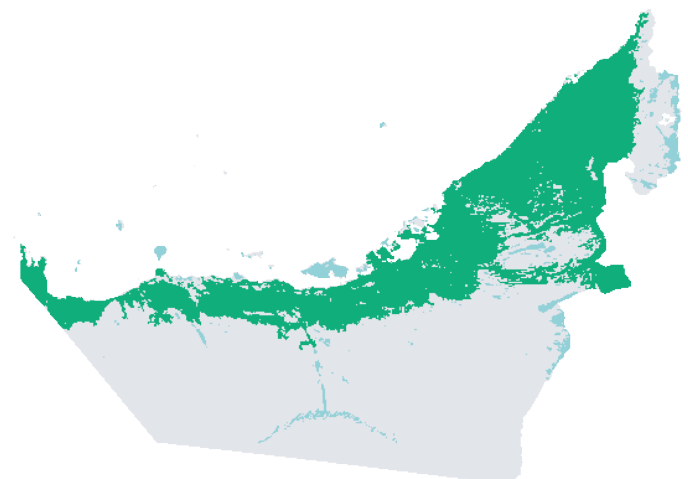



Species distribution models

*Myriopholis macrorhyncha*

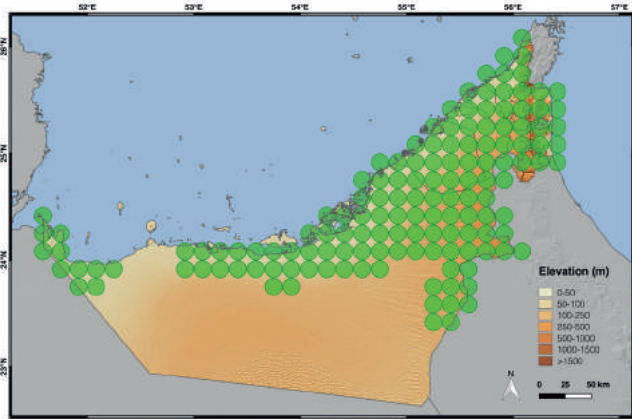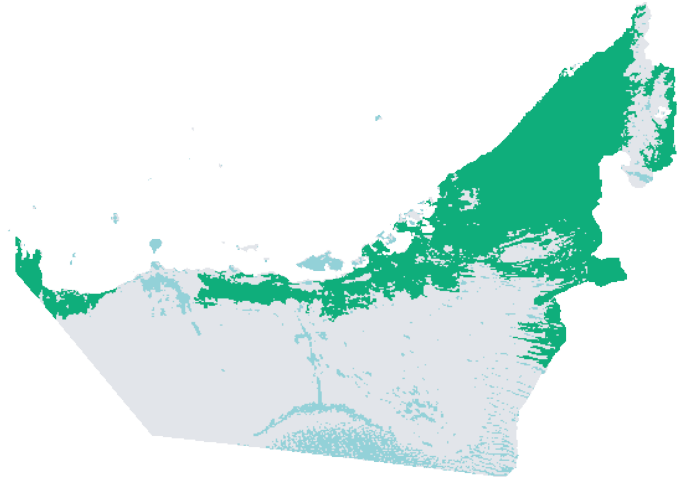

*Indotyphlops braminus*

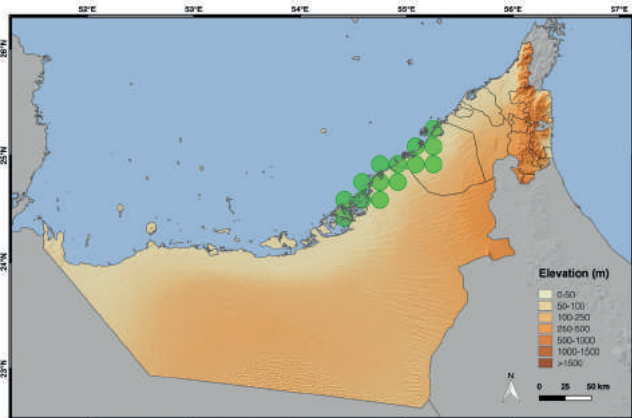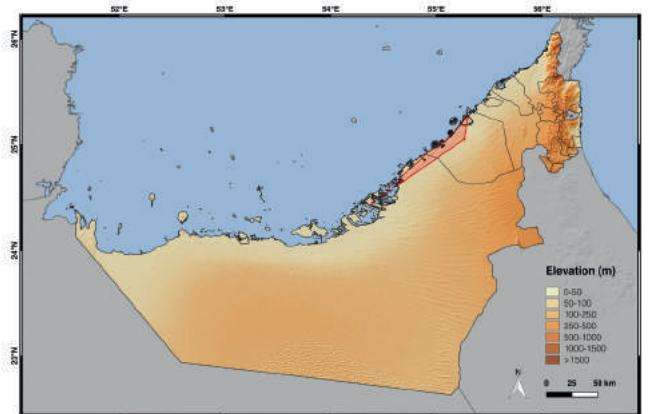

*Cerastes gasperettii gasperettii*

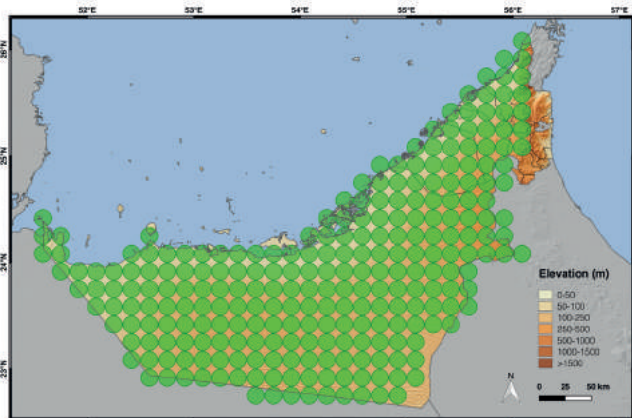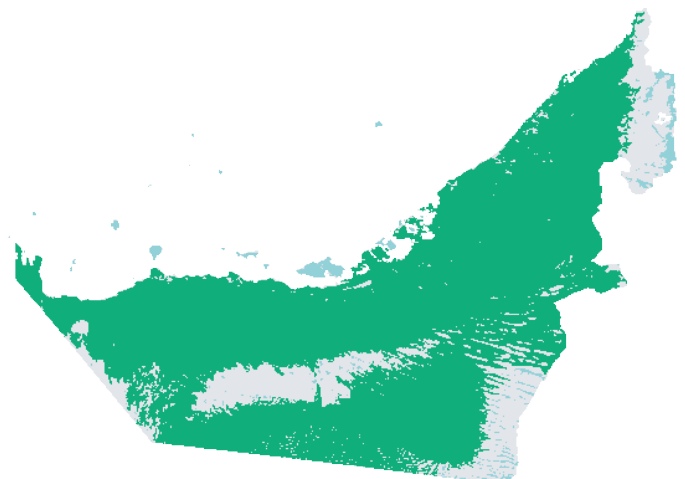

Species distribution models

*Echis carinatus sochureki*

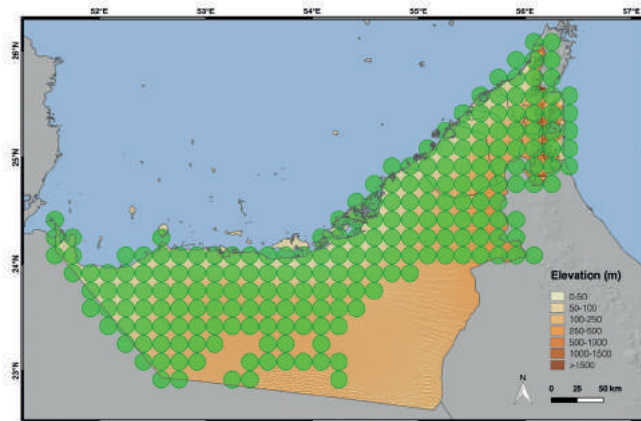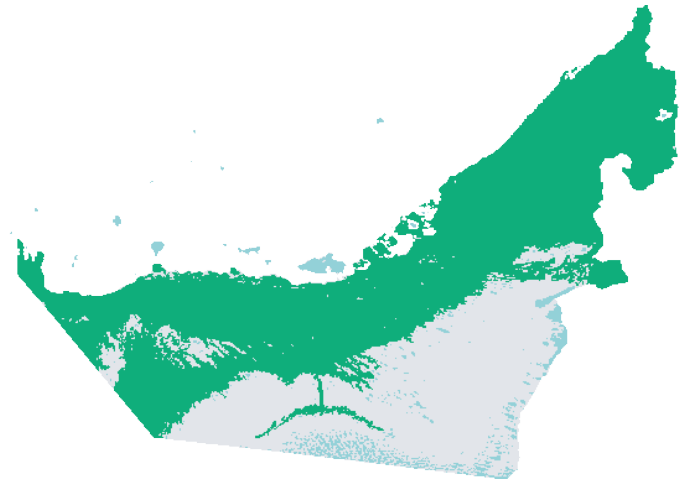

*Echis omanensis*

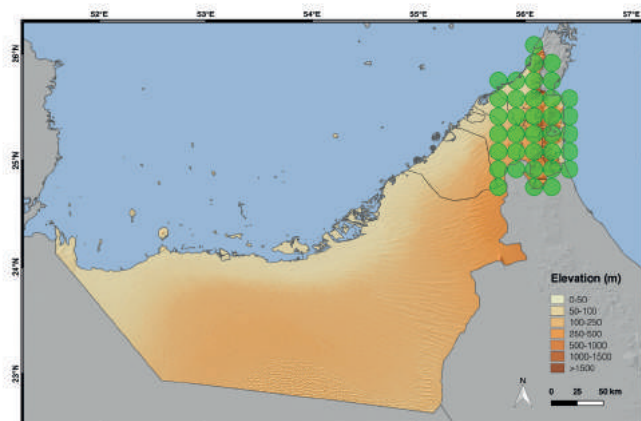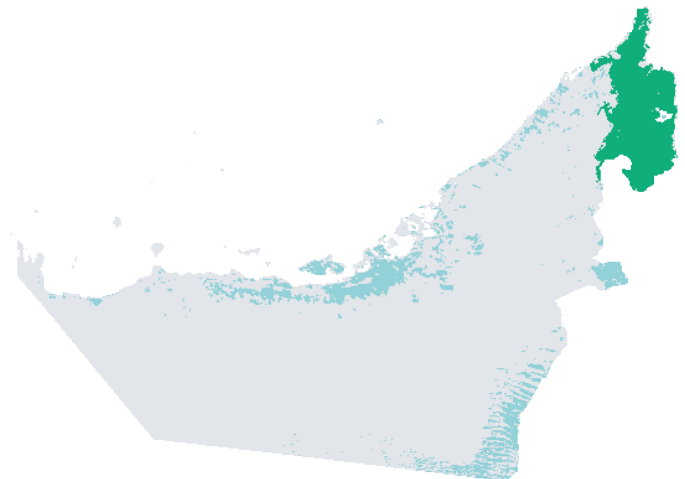

*Pseudocerastes persicus*

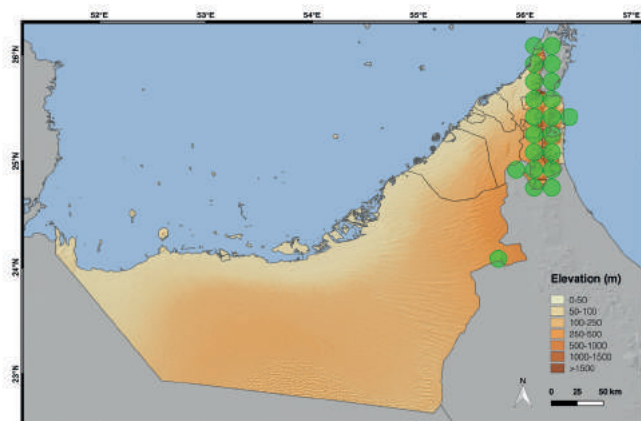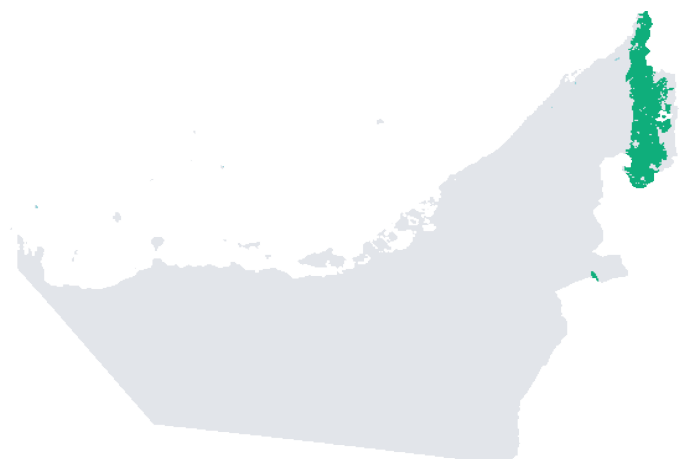

Supplement: pone.0216273.s001.pdf [file pone.0216273.s001.pdf]
