# Supplementary material for: An integrative assessment of the diversity, phylogeny, distribution, and conservation of the terrestrial reptiles (Sauropsida, Squamata) of the United Arab Emirates
Source: PubMed Central journal article supplement (PMC6497385; doi:10.1371/journal.pone.0216273), 2019-05-02
Supplement: pone.0216273.s012.pdf [file pone.0216273.s012.pdf]

| SPECIES                                 | FAMILY            | COUNTRY | CODE       | 12S       | 16S       | BDNF     | CMOS     | Cytb            | ND2       | ND4       | NT3      | PDC      | R35      | RAG1     | RAG2     | MC1R     | ACM4     | COI       |
|-----------------------------------------|-------------------|---------|------------|-----------|-----------|----------|----------|-----------------|-----------|-----------|----------|----------|----------|----------|----------|----------|----------|-----------|
| <i>Rhineura floridana</i>               | Rhineuridae       |         |            | KU744569  | EU203657  | FJ441848 | AY444022 | -               | -         | KU744593  | GU456034 | EU293714 | DQ119613 | AY444048 | DQ119631 | -        | EF534899 | -         |
| <i>Rhinophis drummondhayi</i>           | Uropeltidae       |         |            | AY700994  | AY701029  | FJ433966 | AF544719 | AF544673        | -         | -         | FJ434071 | -        | FJ433920 | -        | FJ433896 | -        | -        | -         |
| <i>Saara hardwickii</i>                 | Agamidae          |         |            | HM040904  | FJ639591  | GU457849 | -        | AB474757        | AB113803  | -         | GU456005 | -        | -        | GU457972 | -        | -        | -        | -         |
| <i>Scincus mitranus</i>                 | Scincidae         | UAE     |            | EU278015  | EU278080  | -        | -        | EU278247        | -         | -         | -        | -        | -        | -        | -        | -        | -        | -         |
| <i>Scincus scincus conirostris</i>      | Scincidae         | UAE     |            | AY218025  | AY308304  | HM160669 | AY217873 | AY217822        | AY607278  | -         | GU456028 | -        | HM161142 | HM161238 | -        | -        | -        | -         |
| <i>Shinisaurus crocodilurus</i>         | Shinisauridae     |         |            | NC_005959 | AB080274  | GU457857 | AY099976 | NC_005959       | NC_005959 | NC_005959 | GU456013 | -        | HQ876341 | AY662610 | -        | -        | -        | -         |
| <i>Spalerosophis diadema cliffordii</i> | Colubridae        | UAE     |            | AY039144  | HQ658450  | -        | AF471155 | AF471049        | AY487020  | AY487059  | KX695051 | -        | -        | KX695115 | -        | -        | -        | AY039186  |
| <i>Sphaerodactylus elegans</i>          | Sphaerodactylidae |         |            | KF017637  | X86048    | -        | EF534912 | KF017628        | JN393942  | -         | -        | EF534828 | -        | EF534787 | EF534954 | -        | EF534869 | -         |
| <i>Sphaerodactylus macrolepis</i>       | Sphaerodactylidae |         |            | KC840470  | X86047    | -        | HQ426580 | -               | KP640637  | -         | -        | HQ426238 | -        | HQ426326 | HQ426499 | -        | HQ426409 | -         |
| <i>Sphenodon punctatus</i>              | Sphenodontidae    |         | 3          | AF534390  | AF534390  | GU457846 | AF039483 | AF534390        | AF534390  | AF534390  | -        | HQ426257 | HQ876320 | AY662576 | HQ426516 | -        | AY168473 | AF534390  |
| <i>Stenodactylus arabicus</i>           | Gekkonidae        | UAE     | E150536    | KC190693  | KC190887  | -        | KC190996 | -               | -         | -         | -        | -        | -        | -        | KC191115 | KF898478 | -        | -         |
| <i>Stenodactylus doriae</i>             | Gekkonidae        | UAE     | E150538    | KC190653  | KC190847  | -        | KC190939 | -               | -         | -         | -        | -        | -        | -        | KC191050 | -        | -        | -         |
| <i>Stenodactylus leptocosymbotus</i>    | Gekkonidae        | UAE     |            | KC190665  | KC190860  | HQ443633 | KC190943 | -               | HQ443536  | -         | -        | -        | -        | -        | KC191052 | -        | -        | -         |
| <i>Stenodactylus slevini</i>            | Gekkonidae        | UAE     | E1505334   | KC190687  | KC190881  | -        | KC190993 | -               | -         | -         | -        | -        | -        | -        | KC191060 | -        | -        | -         |
| <i>Telescopus dhara dhara</i>           | Colubridae        | UAE     |            | HQ658443  | HQ267786  | -        | -        | -               | -         | -         | -        | -        | -        | -        | -        | -        | -        | -         |
| <i>Teratoscincus keyserlingii</i>       | Sphaerodactylidae | UAE     |            | AY753545  | AY753545  | -        | HQ426589 | AY753545        | AY753545  | AY753545  | -        | -        | -        | -        | HQ426508 | -        | HQ426418 | AY753545  |
| <i>Teratoscincus roborowskii</i>        | Sphaerodactylidae |         |            | KP115216  | KP115216  | -        | EF534925 | KP115216        | KP115216  | KP115216  | -        | EF534841 | -        | EF534799 | EF534967 | -        | EF534882 | MF573804  |
| <i>Trachydactylus hajarensis</i>        | Gekkonidae        | UAE     | CN2575     | KT302073  | -         | -        | KT302105 | -               | -         | -         | -        | KT302133 | -        | KT302135 | KT302141 | -        | KT302096 | -         |
| <i>Trachylepis tessellata</i>           | Scincidae         | UAE     |            | JQ598776  | JQ598788  | -        | -        | -               | -         | -         | -        | -        | -        | -        | -        | -        | -        | -         |
| <i>Trapelus flavimaculatus</i>          | Agamidae          | UAE     | Trapflav01 | -         | -         | -        | -        | <b>MK751378</b> | AB201529  | -         | -        | -        | -        | -        | -        | -        | -        | -         |
| <i>Tropidophis haetianus</i>            | Tropidophiidae    |         |            | NC_012573 | NC_012573 | AY988039 | AY099962 | NC_012573       | NC_012573 | NC_012573 | EU390938 | -        | JN703089 | AY988073 | -        | -        | -        | NC_012573 |
| <i>Uromastyx aegyptia lepteni</i>       | Agamidae          | UAE     | ZFMK52398  | FJ639660  | FJ639623  | -        | -        | MF960595        | -         | -         | -        | -        | -        | -        | -        | -        | -        | -         |
| <i>Uromastyx aegyptia microlepis</i>    | Agamidae          | UAE     | SPM001689  | FJ639657  | MF980196  | -        | -        | MF960570        | -         | MF993191  | MF960471 | -        | -        | -        | -        | MF960369 | MF960260 | -         |
| <i>Urostrophus vautieri</i>             | Leiosauridae      |         |            | -         | KM517592  | HQ876219 | KT342957 | KT342907        | AF528734  | KM517830  | JF804576 | -        | HQ876330 | HQ876435 | -        | -        | -        | -         |
| <i>Uta stansburiana</i>                 | Phrynosomatidae   |         |            | DQ385408  | L41489    | DQ385334 | AF315389 | AY141102        | AF049863  | AY141066  | JF804577 | -        | JF804610 | -        | JX481733 | -        | -        | KU986271  |
| <i>Varanus griseus griseus</i>          | Varanidae         | UAE     |            | KU746369  | KU746383  | -        | -        | KU867856        | U71334    | -         | -        | -        | -        | AY662608 | -        | -        | -        | -         |
| <i>Woodworthia maculatus</i>            | Diplodactylidae   |         | 5          | -         | HM542437  | -        | JQ945628 | -               | GU459852  | JQ398454  | -        | GU459651 | -        | GU459449 | JQ945522 | -        | JQ945735 | -         |
| <i>Xantusia vigilis</i>                 | Xantusiidae       |         |            | AY218042  | DQ249035  | EU108491 | EU116835 | EU116656        | EU130279  | AY584459  | EU390904 | HQ426258 | HM161146 | AY662642 | DQ119626 | -        | HQ426431 | KU986173  |
| <i>Xenodermus javanicus</i>             | Xenodermidae      |         |            | AF544781  | AF544810  | EU402667 | AF544711 | AY425810        | -         | U49320    | -        | -        | JN703065 | EU402869 | -        | -        | -        | -         |
| <i>Xenopeltis unicolor</i>              | Xenopeltidae      |         |            | AF512735  | AF512735  | FJ433968 | AF544689 | LC105622        | -         | -         | FJ434073 | -        | FJ433922 | EU402870 | FJ433898 | -        | -        | -         |
| <i>Xenosaurus grandis</i>               | Xenosauridae      |         |            | -         | -         | GU457858 | AY662567 | -               | U71333    | -         | GU456014 | -        | JN703069 | AY662607 | -        | -        | -        | -         |
| <i>Xenotyphlops grandidieri</i>         | Xenotyphlopidae   |         |            | KT316450  | -         | GU902457 | -        | KF770851        | -         | -         | GU902627 | -        | -        | JQ073250 | -        | -        | -        | JQ909623  |
| <i>Zonosaurus ornatus</i>               | Gerrhosauridae    |         |            | AJ416929  | AJ416930  | JN654807 | DQ100120 | DQ004409        | -         | -         | JN568317 | -        | JN568497 | JN614040 | KC515332 | -        | -        | JQ909633  |
