# Supplementary material for: An integrative assessment of the diversity, phylogeny, distribution, and conservation of the terrestrial reptiles (Sauropsida, Squamata) of the United Arab Emirates
Source: PubMed Central journal article supplement (PMC6497385; doi:10.1371/journal.pone.0216273), 2019-05-02
Supplement: pone.0216273.s013.pdf [file pone.0216273.s013.pdf]

**S2 Table. Information on the dataset used for the phylogenetic analyses.** Composition, length, partitions, models and run- specifications for the dataset used for phylogenetic analyses.

| Dataset               | Genes | N° seq | bp      | Subst. model (unlinked)<br>& partitions | Clock model (unlinked)            | Tree model (linked)                             | Alignments                                     | Other prior parameters                                                                                                            | Run specifications                              |
|-----------------------|-------|--------|---------|-----------------------------------------|-----------------------------------|-------------------------------------------------|------------------------------------------------|-----------------------------------------------------------------------------------------------------------------------------------|-------------------------------------------------|
| 146 taxa<br>14,454 bp | 12S   | 125    | 329     | GTR + G                                 | Uncorrelated relaxed<br>Lognormal |                                                 | <b>Geneious</b><br>Muscle alignment            |                                                                                                                                   |                                                 |
|                       | 16S   | 108    | 442     |                                         |                                   |                                                 |                                                |                                                                                                                                   |                                                 |
|                       | COI   | 52     | 1.605   | GTR + G                                 |                                   |                                                 |                                                |                                                                                                                                   |                                                 |
|                       | CYTb  | 118    | 1.167   | GTR + G                                 |                                   |                                                 |                                                |                                                                                                                                   |                                                 |
|                       | ND2   | 75     | 1.056   | GTR + G                                 |                                   |                                                 |                                                |                                                                                                                                   |                                                 |
|                       | ND4   | 69     | 1.383   | GTR + G                                 |                                   |                                                 |                                                |                                                                                                                                   |                                                 |
|                       | CMOS  | 120    | 945     | GTR + G                                 | Strict clock                      | Yule process<br>User-specified tree: RaxML tree | <b>TranslatorX</b><br>Muscle protein alignment | <b>Partition Finder</b><br>Branch length: linked<br>Models of evolution: BEAST<br>Model selection: BIC<br>Greedy search algorithm | <b>RaxML</b><br>Generations: 100<br>Reps: 1,000 |
|                       | RAG2  | 52     | 720     |                                         |                                   |                                                 |                                                |                                                                                                                                   |                                                 |
|                       | RAG1  | 91     | 2.934   |                                         |                                   |                                                 |                                                |                                                                                                                                   |                                                 |
|                       | ACM4  | 41     | 444     |                                         |                                   |                                                 |                                                |                                                                                                                                   |                                                 |
|                       | NT3   | 66     | 669     |                                         |                                   |                                                 |                                                |                                                                                                                                   |                                                 |
|                       | PDC   | 23     | 441     |                                         |                                   |                                                 |                                                |                                                                                                                                   |                                                 |
|                       | BDNF  | 74     | 714     |                                         |                                   |                                                 |                                                |                                                                                                                                   |                                                 |
| MC1R                  | 34    | 861    | GTR + G |                                         |                                   |                                                 |                                                |                                                                                                                                   |                                                 |
| R35                   | 57    | 744    | GTR + G |                                         |                                   |                                                 |                                                |                                                                                                                                   |                                                 |
