# Supplementary material for: An integrative assessment of the diversity, phylogeny, distribution, and conservation of the terrestrial reptiles (Sauropsida, Squamata) of the United Arab Emirates
Source: PubMed Central journal article supplement (PMC6497385; doi:10.1371/journal.pone.0216273), 2019-05-02
Supplement: pone.0216273.s014.pdf [file pone.0216273.s014.pdf]

**S3 Table. Checklist of the 60 species of UAE terrestrial reptiles. Table containing all the species recorded in this study and separated by families and by higher taxa.** The table contains information regarding the global and regional IUCN conservation category for all the species and indicates if they are endemic and if it is a medically important venomous species. Asterisks highlight the three introduced species.

| Taxa                                    | Family/Species                           | Global IUCN | Regional IUCN | Endemic | Venomous |
|-----------------------------------------|------------------------------------------|-------------|---------------|---------|----------|
| Lizards (46)                            | Agamids (6)                              |             |               |         |          |
|                                         | Agamidae (6)                             |             |               |         |          |
|                                         | <i>Phrynocephalus arabicus</i>           | LC          | LC            | NO      | NO       |
|                                         | <i>Phrynocephalus maculatus</i>          | LC          | LC            | NO      | NO       |
|                                         | <i>Pseudotrapelus jensvindumi</i>        | NE          | LC            | NO      | NO       |
|                                         | <i>Trapelus flavimaculatus</i>           | LC          | LC            | NO      | NO       |
|                                         | <i>Uromastyx aegyptia leptieni</i>       | VU          | VU            | NO      | NO       |
|                                         | <i>Uromastyx aegyptia microlepis</i>     | VU          | VU            | NO      | NO       |
|                                         | Amphisbaenids(1)                         |             |               |         |          |
|                                         | Trogonophidae (1)                        |             |               |         |          |
|                                         | <i>Diplometopon zarudnyi</i>             | LC          | LC            | NO      | NO       |
|                                         | Geckos (22)                              |             |               |         |          |
|                                         | Gekkonidae (11)                          |             |               |         |          |
|                                         | <i>Bunopus tuberculatus</i>              | LC          | LC            | NO      | NO       |
|                                         | <i>Cyrtopodion scabrum</i>               | LC          | LC            | NO      | NO       |
|                                         | <i>Hemidactylus flaviviridis*</i>        | LC          | NA            | NO      | NO       |
|                                         | <i>Hemidactylus persicus</i>             | LC          | VU            | NO      | NO       |
|                                         | <i>Hemidactylus robustus</i>             | LC          | LC            | NO      | NO       |
|                                         | <i>Pseudoceramodactylus khobarensis</i>  | LC          | LC            | NO      | NO       |
|                                         | <i>Stenodactylus arabicus</i>            | LC          | LC            | NO      | NO       |
|                                         | <i>Stenodactylus doriae</i>              | LC          | LC            | NO      | NO       |
|                                         | <i>Stenodactylus leptosymbotes</i>       | LC          | LC            | NO      | NO       |
|                                         | <i>Stenodactylus slevini</i>             | LC          | LC            | NO      | NO       |
|                                         | <i>Trachydactylus hajarensis</i>         | NE          | LC            | NO      | NO       |
|                                         | Phyllodactylidae (6)                     |             |               |         |          |
|                                         | <i>Asaccus caudivolvulus</i>             | CR          | CR            | YES     | NO       |
|                                         | <i>Asaccus gallagheri</i>                | LC          | LC            | NO      | NO       |
|                                         | <i>Asaccus gardneri</i>                  | NE          | LC            | NO      | NO       |
|                                         | <i>Asaccus margaritae</i>                | NE          | VU            | NO      | NO       |
|                                         | <i>Pyodactylus orlovi</i>                | NE          | LC            | NO      | NO       |
|                                         | <i>Ptyodactylus ruusaljibalicus</i>      | NE          | LC            | NO      | NO       |
|                                         | Sphaerodactylidae (5)                    |             |               |         |          |
|                                         | <i>Pristurus carteri</i>                 | LC          | CR            | NO      | NO       |
|                                         | <i>Pristurus celerrimus</i>              | LC          | LC            | NO      | NO       |
|                                         | <i>Pristurus minimus</i>                 | LC          | LC            | NO      | NO       |
|                                         | <i>Pristurus rupestris-sp.3</i>          | NE          | LC            | NO      | NO       |
|                                         | <i>Teratoscincus keyserlingii</i>        | LC          | CR            | NO      | NO       |
|                                         | Lacertids (10)                           |             |               |         |          |
|                                         | Lacertidae (10)                          |             |               |         |          |
|                                         | <i>Acanthodactylus blanfordii</i>        | LC          | VU            | NO      | NO       |
|                                         | <i>Acanthodactylus boskianus asper</i>   | LC          | NT            | NO      | NO       |
|                                         | <i>Acanthodactylus gongrorhynchatus</i>  | DD          | LC            | NO      | NO       |
|                                         | <i>Acanthodactylus haasi</i>             | LC          | DD            | NO      | NO       |
|                                         | <i>Acanthodactylus ophiodurus</i>        | LC          | DD            | NO      | NO       |
|                                         | <i>Acanthodactylus schmidti</i>          | LC          | LC            | NO      | NO       |
|                                         | <i>Mesalina adramitana</i>               | LC          | LC            | NO      | NO       |
| <i>Mesalina brevirostris</i>            | LC                                       | LC          | NO            | NO      |          |
| <i>Omanosaura cyanura</i>               | LC                                       | LC          | NO            | NO      |          |
| <i>Omanosaura jayakari</i>              | LC                                       | LC          | NO            | NO      |          |
| Skinks (6)                              |                                          |             |               |         |          |
| Scincidae (6)                           |                                          |             |               |         |          |
| <i>Ablepharus pannonicus</i>            | LC                                       | LC          | NO            | NO      |          |
| <i>Chalcides ocellatus ocellatus*</i>   | LC                                       | NA          | NO            | NO      |          |
| <i>Heremites septemtaeniatus</i>        | LC                                       | DD          | NO            | NO      |          |
| <i>Scincus mitranus</i>                 | LC                                       | LC          | NO            | NO      |          |
| <i>Scincus scincus conirostris</i>      | LC                                       | DD          | NO            | NO      |          |
| <i>Trachylepis tessellata</i>           | LC                                       | LC          | NO            | NO      |          |
| Varanids (1)                            |                                          |             |               |         |          |
| Varanidae (1)                           |                                          |             |               |         |          |
| <i>Varanus griseus griseus</i>          | LC                                       | LC          | NO            | NO      |          |
| Snakes (14)                             | Boidae (1)                               |             |               |         |          |
|                                         | <i>Eryx jayakari</i>                     | LC          | LC            | NO      | NO       |
|                                         | Colubridae (5)                           |             |               |         |          |
|                                         | <i>Lytrochynchus diadema diadema</i>     | LC          | LC            | NO      | NO       |
|                                         | <i>Platyceps rhodorachis rhodorachis</i> | LC          | LC            | NO      | NO       |
|                                         | <i>Platyceps ventromaculatus</i>         | LC          | VU            | NO      | NO       |
|                                         | <i>Spalerosophis diadema cliffordii</i>  | LC          | LC            | NO      | NO       |
|                                         | <i>Telescopus dhara dhara</i>            | LC          | LC            | NO      | NO       |
|                                         | Lamprophiidae (2)                        |             |               |         |          |
|                                         | <i>Psammodphis schokari</i>              | LC          | LC            | NO      | NO       |
|                                         | <i>Rhagerhis moilensis</i>               | LC          | LC            | NO      | NO       |
|                                         | Leptotyphlopidae (2)                     |             |               |         |          |
|                                         | <i>Myriopholis macrorhyncha</i>          | LC          | LC            | NO      | NO       |
|                                         | Typhlopidae (1)                          |             |               |         |          |
| <i>Indotyphlops braminus*</i>           | LC                                       | NA          | NO            | NO      |          |
| Viperidae (4)                           |                                          |             |               |         |          |
| <i>Cerastes gasperettii gasperettii</i> | LC                                       | LC          | NO            | YES     |          |
| <i>Echis carinatus sochureki</i>        | LC                                       | LC          | NO            | YES     |          |
| <i>Echis omanensis</i>                  | LC                                       | LC          | NO            | YES     |          |
| <i>Pseudocerastes persicus</i>          | LC                                       | LC          | NO            | YES     |          |
