# Supplementary material for: An integrative assessment of the diversity, phylogeny, distribution, and conservation of the terrestrial reptiles (Sauropsida, Squamata) of the United Arab Emirates
Source: PubMed Central journal article supplement (PMC6497385; doi:10.1371/journal.pone.0216273), 2019-05-02
Supplement: pone.0216273.s015.pdf [file pone.0216273.s015.pdf]

**S4 Table. Information on the 60 species of UAE terrestrial reptiles for the whole country and independently for each emirate.** Number and percentage of the total number of species, threatened species and medically important venomous species based on presence data. The conservation status follows the yet unpublished regional IUCN red list

|                      | <b>Species</b> |        | <b>Threatened species</b> |        | <b>Venomous species</b> |      |
|----------------------|----------------|--------|---------------------------|--------|-------------------------|------|
| <b>Emirates/ UAE</b> | 60             | 100,0% | 8                         | 100,0% | 4                       | 100% |
| Abu Dhabi            | 43             | 71,6%  | 6                         | 75,0%  | 3                       | 75%  |
| Ajman                | 18             | 30,0%  | 0                         | 0,0%   | 2                       | 50%  |
| Dubai                | 36             | 60,0%  | 3                         | 37,5%  | 3                       | 75%  |
| Fujairah             | 25             | 41,6%  | 2                         | 25,0%  | 3                       | 75%  |
| Ras al-Khaymah       | 37             | 61,6%  | 1                         | 12,5%  | 4                       | 100% |
| Sharjah              | 44             | 73,3%  | 5                         | 62,5%  | 4                       | 100% |
| Umm al-Quwain        | 24             | 40,0%  | 1                         | 12,5%  | 2                       | 50%  |
