# Supplementary material for: An integrative assessment of the diversity, phylogeny, distribution, and conservation of the terrestrial reptiles (Sauropsida, Squamata) of the United Arab Emirates
Source: PubMed Central journal article supplement (PMC6497385; doi:10.1371/journal.pone.0216273), 2019-05-02
Supplement: pone.0216273.s016.pdf [file pone.0216273.s016.pdf]

**S5 Table. Area of Occupancy (AOO) and Species Potential Distribution (SPD) at 4 km<sup>2</sup> of all 60 terrestrial reptiles of the UAE.** Number of occupied cells of 4 km<sup>2</sup> for each approach, area occupied by each species for each approach. Asterisks highlight the three introduced species.

| SPECIES                                  | AOO                     |                      | SPD                     |                      |
|------------------------------------------|-------------------------|----------------------|-------------------------|----------------------|
|                                          | N° of grids<br>(2x2 km) | Area km <sup>2</sup> | N° of grids<br>(2x2 km) | Area km <sup>2</sup> |
| <i>Ablepharus pannonicus</i>             | 3                       | 12                   | 16                      | 64                   |
| <i>Acanthodactylus blanfordii</i>        | 2                       | 8                    | 2                       | 8                    |
| <i>Acanthodactylus boskianus asper</i>   | 6                       | 24                   | 538                     | 2,152                |
| <i>Acanthodactylus gongrorhynchatus</i>  | 53                      | 212                  | 18,179                  | 72,716               |
| <i>Acanthodactylus haasi</i>             | 5                       | 20                   | 11,565                  | 46,260               |
| <i>Acanthodactylus ophiodurus</i>        | 8                       | 32                   | 7,399                   | 29,596               |
| <i>Acanthodactylus schmidti</i>          | 356                     | 1,424                | 18,475                  | 73,900               |
| <i>Asaccus caudivolvulus</i>             | 2                       | 8                    | 2                       | 8                    |
| <i>Asaccus gallagheri</i>                | 42                      | 168                  | 1,303                   | 5,212                |
| <i>Asaccus gardneri</i>                  | 7                       | 28                   | 289                     | 1,156                |
| <i>Asaccus margaritae</i>                | 1                       | 4                    | 1                       | 4                    |
| <i>Bunopus tuberculatus</i>              | 263                     | 1,052                | 19,444                  | 77,776               |
| <i>Cerastes gasperettii gasperettii</i>  | 128                     | 512                  | 16,321                  | 65,284               |
| <i>Chalcides ocellatus ocellatus*</i>    | 20                      | 80                   | 11,504                  | 46,016               |
| <i>Cyrtopodion scabrum</i>               | 48                      | 192                  | 15,287                  | 61,148               |
| <i>Diplometopon zarudnyi</i>             | 71                      | 284                  | 11,638                  | 46,552               |
| <i>Echis carinatus sochureki</i>         | 77                      | 308                  | 12,606                  | 50,424               |
| <i>Echis omanensis</i>                   | 67                      | 268                  | 1,407                   | 5,628                |
| <i>Eryx jayakari</i>                     | 156                     | 624                  | 18,604                  | 74,416               |
| <i>Hemidactylus flaviviridis*</i>        | 38                      | 152                  | 19,412                  | 77,648               |
| <i>Hemidactylus persicus</i>             | 4                       | 16                   | 258                     | 1,032                |
| <i>Hemidactylus robustus</i>             | 80                      | 320                  | 12,040                  | 48,160               |
| <i>Heremites septemtaeniata</i>          | 3                       | 12                   | 786                     | 3,144                |
| <i>Indotyphlops braminus*</i>            | 4                       | 16                   | 337                     | 1,348                |
| <i>Lytrochynchus diadema diadema</i>     | 98                      | 392                  | 16,473                  | 65,892               |
| <i>Mesalina adramitana</i>               | 68                      | 272                  | 5,772                   | 23,088               |
| <i>Mesalina brevirostris</i>             | 68                      | 272                  | 5,929                   | 23,716               |
| <i>Myriopholis macrorhyncha</i>          | 17                      | 68                   | 7,057                   | 28,228               |
| <i>Omanosaura cyanura</i>                | 25                      | 100                  | 1,459                   | 5,836                |
| <i>Omanosaura jayakari</i>               | 31                      | 124                  | 1,253                   | 5,012                |
| <i>Phrynocephalus arabicus</i>           | 260                     | 1,040                | 17,753                  | 71,012               |
| <i>Phrynocephalus maculatus</i>          | 40                      | 160                  | 14,466                  | 57,864               |
| <i>Platyceps rhodorachis rhodorachis</i> | 43                      | 172                  | 1,323                   | 5,292                |
| <i>Platyceps ventromaculatus</i>         | 8                       | 32                   | 29                      | 116                  |
| <i>Pristurus carteri</i>                 | 2                       | 8                    | 8                       | 32                   |
| <i>Pristurus celerrimus</i>              | 54                      | 216                  | 1,293                   | 5,172                |
| <i>Pristurus minimus</i>                 | 25                      | 100                  | 3,316                   | 13,264               |
| <i>Pristurus rupestris</i> -sp. 3        | 128                     | 512                  | 1,433                   | 5,732                |
| <i>Psammophis schokari</i>               | 129                     | 516                  | 19,591                  | 78,364               |
| <i>Pseudoceramodactylus khobarensis</i>  | 33                      | 132                  | 12,844                  | 51,376               |
| <i>Pseudocerastes persicus</i>           | 21                      | 84                   | 815                     | 3,260                |
| <i>Pseudotrapelus jensvindumi</i>        | 59                      | 236                  | 1,627                   | 6,508                |
| <i>Ptyodactylus orlovi</i>               | 45                      | 180                  | 2,237                   | 8,948                |
| <i>Ptyodactylus ruusaljibalicus</i>      | 5                       | 20                   | 1,222                   | 4,888                |
| <i>Rhagerhis moilensis</i>               | 65                      | 260                  | 7,044                   | 28,176               |
| <i>Scincus mitranus</i>                  | 246                     | 984                  | 18,010                  | 72,040               |
| <i>Scincus scincus conirostris</i>       | 10                      | 40                   | 5,178                   | 20,712               |
| <i>Spalerosophis diadema cliffordii</i>  | 13                      | 52                   | 1,512                   | 6,048                |
| <i>Stenodactylus arabicus</i>            | 211                     | 844                  | 16,196                  | 64,784               |
| <i>Stenodactylus doriae</i>              | 185                     | 740                  | 18,621                  | 74,484               |
| <i>Stenodactylus leptocosymbotes</i>     | 53                      | 212                  | 4,827                   | 19,308               |
| <i>Stenodactylus slevini</i>             | 45                      | 180                  | 11,234                  | 44,936               |
| <i>Telescopus dhara dhara</i>            | 7                       | 28                   | 1,507                   | 6,028                |
| <i>Teratoscincus keyserlingii</i>        | 54                      | 216                  | 2,363                   | 9,452                |
| <i>Trachydactylus hajarensis</i>         | 52                      | 208                  | 1,425                   | 5,700                |
| <i>Trachylepis tessellata</i>            | 14                      | 56                   | 1,359                   | 5,436                |
| <i>Trapelus flavimaculatus</i>           | 90                      | 360                  | 13,381                  | 53,524               |
| <i>Uromastyx aegyptia leptieni</i>       | 140                     | 560                  | 14,910                  | 59,640               |
| <i>Uromastyx aegyptia microlepis</i>     | 81                      | 324                  | 13,840                  | 55,360               |
| <i>Varanus griseus griseus</i>           | 118                     | 472                  | 18,285                  | 73,140               |
