# Supplementary material for: An integrative assessment of the diversity, phylogeny, distribution, and conservation of the terrestrial reptiles (Sauropsida, Squamata) of the United Arab Emirates
Source: PubMed Central journal article supplement (PMC6497385; doi:10.1371/journal.pone.0216273), 2019-05-02
Supplement: pone.0216273.s017.pdf [file pone.0216273.s017.pdf]

**S6 Table. Loadings, eigenvalues, and variance explained by the two first components retained from the Principal Component Analysis (PCA) performed on the 19 bioclimatic variables used in this study.** BIO1 = Annual Mean Temperature, BIO4 = Temperature Seasonality, BIO5 = Max Temperature of Warmest Month, BIO6 = Min Temperature of Coldest Month, BIO7 = Temperature Annual Range, BIO10 = Mean Temperature of Warmest Quarter, BIO11 = Mean Temperature of Coldest Quarter, BIO12 = Annual Precipitation, BIO13 = Precipitation of Wettest Month, BIO16 = Precipitation of Wettest Quarter, BIO18 = Precipitation of Warmest Quarter, BIO19 = Precipitation of Coldest Quarter

| <b>Climatic Variables</b> | <b>PC1</b> | <b>PC2</b> |
|---------------------------|------------|------------|
| BIO1                      | 0,27302    | -0,07493   |
| BIO2                      | 0,24910    | -0,26812   |
| BIO3                      | 0,15036    | -0,22257   |
| BIO4                      | 0,25088    | -0,22293   |
| BIO5                      | 0,27909    | -0,19821   |
| BIO6                      | -0,19897   | 0,29878    |
| BIO7                      | 0,26455    | -0,25462   |
| BIO8                      | 0,21436    | -0,24354   |
| BIO9                      | 0,21691    | -0,04110   |
| BIO10                     | 0,28572    | -0,13842   |
| BIO11                     | 0,14398    | 0,14678    |
| BIO12                     | -0,24658   | -0,25498   |
| BIO13                     | -0,22789   | -0,23086   |
| BIO14                     | -0,21354   | -0,27939   |
| BIO15                     | 0,14579    | 0,31607    |
| BIO16                     | -0,23035   | -0,23839   |
| BIO17                     | -0,23325   | -0,30298   |
| BIO18                     | -0,22223   | -0,24408   |
| BIO19                     | -0,24206   | -0,15392   |
| STD                       | 3,173      | 2,0892     |
| Variance explained (%)    | 53         | 22,9       |
