# Supplementary material for: An integrative assessment of the diversity, phylogeny, distribution, and conservation of the terrestrial reptiles (Sauropsida, Squamata) of the United Arab Emirates
Source: PubMed Central journal article supplement (PMC6497385; doi:10.1371/journal.pone.0216273), 2019-05-02
Supplement: pone.0216273.s018.pdf [file pone.0216273.s018.pdf]

**S7 Table. Information on the protected areas of each emirate.** The table contains: the name of each emirate, the area of each emirate in km<sup>2</sup>; the number of protected areas that are inside each emirate; the area in km<sup>2</sup> that is protected inside each emirate and the percentage of protected areas by emirate.

| <b>Name</b>    | <b>Area (km<sup>2</sup>)</b> | <b>N° of protected areas</b> | <b>Area protected (km<sup>2</sup>)</b> | <b>Area protected (%)</b> |
|----------------|------------------------------|------------------------------|----------------------------------------|---------------------------|
| Abu Dhabi      | 65.027                       | 17                           | 12.103                                 | 19                        |
| Ajman          | 268                          | 2                            | 31                                     | 12                        |
| Dubai          | 4.422                        | 8                            | 1.390                                  | 31                        |
| Fujairah       | 1.930                        | 4                            | 277                                    | 14                        |
| Ras al-Khaymah | 2.758                        | 2                            | 270                                    | 10                        |
| Sharjah        | 2.664                        | 17                           | 420                                    | 16                        |
| Umm al-Quwain  | 820                          | 0                            | 0                                      | 0                         |
