# Supplementary material for: An integrative assessment of the diversity, phylogeny, distribution, and conservation of the terrestrial reptiles (Sauropsida, Squamata) of the United Arab Emirates
Source: PubMed Central journal article supplement (PMC6497385; doi:10.1371/journal.pone.0216273), 2019-05-02
Supplement: pone.0216273.s019.pdf [file pone.0216273.s019.pdf]

**S8 Table. Information for the gap analysis with distribution records with the AOO approach.** List of all 60 species of the UAE, showing their regional IUCN conservation category, their area of occupancy, area of occupancy inside protected areas, and the percentage of area of occupancy inside a protected area. The asterisk highlights the three introduced species. Asterisks highlight the three introduced species. The introduced species have not been included in Fig. 9 and in the analysis and discussion of the results of the gap analysis

| Species                                  | Regional IUCN | Total area (AOO) (km <sup>2</sup> ) | Area protected (km <sup>2</sup> ) | Area protected (%) |
|------------------------------------------|---------------|-------------------------------------|-----------------------------------|--------------------|
| <i>Asaccus caudivolvulus</i>             | CR            | 8                                   | 0                                 | 0.0                |
| <i>Asaccus gardneri</i>                  | LC            | 28                                  | 0                                 | 0.0                |
| <i>Asaccus margaritae</i>                | VU            | 4                                   | 0                                 | 0.0                |
| <i>Indotyphlops braminus*</i>            | NA            | 16                                  | 0                                 | 0.0                |
| <i>Platyceps ventromaculatus</i>         | VU            | 32                                  | 0                                 | 0.0                |
| <i>Pristurus carteri</i>                 | CR            | 8                                   | 0                                 | 0.0                |
| <i>Ptyodactylus ruusaljibalicus</i>      | LC            | 20                                  | 0                                 | 0.0                |
| <i>Pristurus celerrimus</i>              | LC            | 216                                 | 20                                | 9.3                |
| <i>Chalcides ocellatus ocellatus*</i>    | NA            | 80                                  | 8                                 | 10.0               |
| <i>Platyceps rhodorachis rhodorachis</i> | LC            | 172                                 | 20                                | 11.6               |
| <i>Eryx jayakari</i>                     | LC            | 624                                 | 88                                | 14.1               |
| <i>Teratoscincus keyserlingii</i>        | CR            | 216                                 | 32                                | 14.8               |
| <i>Uromastyx aegyptia leptieni</i>       | VU            | 564                                 | 84                                | 14.9               |
| <i>Pristurus minimus</i>                 | LC            | 100                                 | 16                                | 16.0               |
| <i>Acanthodactylus boskianus asper</i>   | NT            | 24                                  | 4                                 | 16.7               |
| <i>Asaccus gallagheri</i>                | LC            | 168                                 | 28                                | 16.7               |
| <i>Trachydactylus hajarensis</i>         | LC            | 208                                 | 36                                | 17.3               |
| <i>Hemidactylus robustus</i>             | LC            | 320                                 | 56                                | 17.5               |
| <i>Stenodactylus arabicus</i>            | LC            | 844                                 | 152                               | 18.0               |
| <i>Diplometopon zarudnyi</i>             | LC            | 284                                 | 52                                | 18.3               |
| <i>Hemidactylus flaviviridis*</i>        | NA            | 152                                 | 28                                | 18.4               |
| <i>Cerastes gasperettii gasperettii</i>  | LC            | 512                                 | 96                                | 18.8               |
| <i>Acanthodactylus haasi</i>             | DD            | 20                                  | 4                                 | 20.0               |
| <i>Stenodactylus slevini</i>             | LC            | 180                                 | 36                                | 20.0               |
| <i>Phrynocephalus arabicus</i>           | LC            | 1040                                | 212                               | 20.4               |
| <i>Lytorhynchus diadema diadema</i>      | LC            | 392                                 | 80                                | 20.4               |
| <i>Pseudoceramodactylus khobarensis</i>  | LC            | 132                                 | 28                                | 21.2               |
| <i>Cyrtopodion scabrum</i>               | LC            | 192                                 | 44                                | 22.9               |
| <i>Rhagerhis moilensis</i>               | LC            | 260                                 | 60                                | 23.1               |
| <i>Pristurus rupestris</i> -sp. 3        | LC            | 512                                 | 120                               | 23.4               |
| <i>Pseudocerastes persicus</i>           | LC            | 84                                  | 20                                | 23.8               |
| <i>Acanthodactylus schmidti</i>          | LC            | 1424                                | 356                               | 25.0               |
| <i>Scincus mitranus</i>                  | LC            | 984                                 | 248                               | 25.2               |
| <i>Psammophis schokari</i>               | LC            | 516                                 | 132                               | 25.6               |
| <i>Omanosaura jayakari</i>               | LC            | 124                                 | 32                                | 25.8               |
| <i>Stenodactylus doriae</i>              | LC            | 740                                 | 196                               | 26.5               |
| <i>Varanus griseus griseus</i>           | LC            | 472                                 | 128                               | 27.1               |
| <i>Acanthodactylus gongrorhynchatus</i>  | LC            | 212                                 | 60                                | 28.3               |
| <i>Mesalina adramitana</i>               | LC            | 272                                 | 80                                | 29.4               |
| <i>Echis omanensis</i>                   | LC            | 268                                 | 80                                | 29.9               |
| <i>Phrynocephalus maculatus</i>          | LC            | 160                                 | 48                                | 30.0               |
| <i>Scincus scincus conirostris</i>       | DD            | 40                                  | 12                                | 30.0               |
| <i>Trapelus flavimaculatus</i>           | LC            | 360                                 | 108                               | 30.0               |
| <i>Spalerosophis diadema cliffordii</i>  | LC            | 52                                  | 16                                | 30.8               |
| <i>Pseudotrapelus jensvindumi</i>        | LC            | 236                                 | 76                                | 32.2               |
| <i>Echis carinatus sochureki</i>         | LC            | 308                                 | 100                               | 32.5               |
| <i>Bunopus tuberculatus</i>              | LC            | 1052                                | 344                               | 32.7               |
| <i>Ablepharus pannonicus</i>             | LC            | 12                                  | 4                                 | 33.3               |
| <i>Heremites septemtaeniatus</i>         | DD            | 12                                  | 4                                 | 33.3               |
| <i>Mesalina brevirostris</i>             | LC            | 272                                 | 96                                | 35.3               |
| <i>Myriopholis macrorhyncha</i>          | LC            | 68                                  | 24                                | 35.3               |
| <i>Uromastyx aegyptia microlepis</i>     | VU            | 324                                 | 116                               | 35.8               |
| <i>Omanosaura cyanura</i>                | LC            | 100                                 | 36                                | 36.0               |
| <i>Ptyodactylus orlovi</i>               | LC            | 180                                 | 72                                | 40.0               |
| <i>Trachylepis tessellata</i>            | LC            | 56                                  | 24                                | 42.9               |
| <i>Stenodactylus leptocosymbotes</i>     | LC            | 212                                 | 100                               | 47.2               |
| <i>Hemidactylus persicus</i>             | VU            | 16                                  | 8                                 | 50.0               |
| <i>Telescopus dhara dhara</i>            | LC            | 28                                  | 16                                | 57.1               |
| <i>Acanthodactylus opheodurus</i>        | DD            | 32                                  | 20                                | 62.5               |
| <i>Acanthodactylus blanfordii</i>        | VU            | 8                                   | 8                                 | 100.0              |
