# Supplementary material for: An integrative assessment of the diversity, phylogeny, distribution, and conservation of the terrestrial reptiles (Sauropsida, Squamata) of the United Arab Emirates
Source: PubMed Central journal article supplement (PMC6497385; doi:10.1371/journal.pone.0216273), 2019-05-02
Supplement: pone.0216273.s020.pdf [file pone.0216273.s020.pdf]

**S9 Table. Information for the gap analysis with distribution records with the species potential distribution (SPD) approach obtained with species distribution modeling (SDM).** List of all 60 species of the UAE, showing their regional IUCN conservation category, their SPD area, the SPD area inside protected areas, and the percentage of the SPD area inside protected areas. The eight species that did not have the minimum of five records to infer their SDMs are underlined. In these cases, the SPD was calculated by the sum of all 4 km<sup>2</sup> squares inside the minimum convex polygon of each species. Asterisks highlight the three introduced species. The introduced species have not been included in Fig. 9 and in the analysis and discussion of the results of the gap analysis.

| Species                                  | Regional IUCN | Total area (km <sup>2</sup> ) | Area protected (km <sup>2</sup> ) | Area protected (%) |
|------------------------------------------|---------------|-------------------------------|-----------------------------------|--------------------|
| <u>Asaccus caudivolvulus</u>             | CR            | 8                             | 0                                 | 0.0                |
| <u>Asaccus margaritae</u>                | VU            | 4                             | 0                                 | 0.0                |
| <i>Platyceps ventromaculatus</i>         | VU            | 116                           | 0                                 | 0.0                |
| <u>Pristurus carteri</u>                 | CR            | 32                            | 0                                 | 0.0                |
| <i>Asaccus gardneri</i>                  | LC            | 1,156                         | 52                                | 4.5                |
| <i>Acanthodactylus boskianus asper</i>   | NT            | 2,152                         | 164                               | 7.6                |
| <i>Spalerosophis diadema cliffordii</i>  | LC            | 6,048                         | 480                               | 7.9                |
| <i>Telescopus dhara dhara</i>            | LC            | 6,028                         | 500                               | 8.3                |
| <i>Trachydactylus hajarensis</i>         | LC            | 5,700                         | 508                               | 8.9                |
| <i>Omanosaura cyanura</i>                | LC            | 5,836                         | 612                               | 10.5               |
| <i>Platyceps rhodorachis rhodorachis</i> | LC            | 5292                          | 580                               | 11.0               |
| <i>Pristurus rupestris</i> -sp. 3        | LC            | 5,732                         | 640                               | 11.2               |
| <i>Pseudotrapelus jensvindumi</i>        | LC            | 6,508                         | 736                               | 11.3               |
| <i>Pristurus celerrimus</i>              | LC            | 5,172                         | 592                               | 11.4               |
| <i>Ptyodactylus ruusaljibalicus</i>      | LC            | 4,888                         | 568                               | 11.6               |
| <i>Echis omanensis</i>                   | LC            | 5,628                         | 656                               | 11.7               |
| <i>Ptyodactylus orlovi</i>               | LC            | 8,948                         | 1,068                             | 11.9               |
| <i>Mesalina adramitana</i>               | LC            | 23,088                        | 2,772                             | 12.0               |
| <i>Asaccus gallagheri</i>                | LC            | 5,212                         | 632                               | 12.1               |
| <i>Trachylepis tessellata</i>            | LC            | 5,436                         | 660                               | 12.1               |
| <i>Omanosaura jayakari</i>               | LC            | 5,012                         | 612                               | 12.2               |
| <i>Pseudocerastes persicus</i>           | LC            | 3,260                         | 416                               | 12.8               |
| <i>Teratoscincus keyserlingii</i>        | CR            | 9,452                         | 1,208                             | 12.8               |
| <i>Acanthodactylus haasi</i>             | DD            | 46,260                        | 5,932                             | 12.8               |
| <i>Diplometopon zarudnyi</i>             | LC            | 46,552                        | 6,188                             | 13.3               |
| <i>Pristurus minimus</i>                 | LC            | 13,264                        | 1,776                             | 13.4               |
| <i>Uromastix aegyptia leptieni</i>       | VU            | 59,640                        | 8,080                             | 13.5               |
| <i>Echis carinatus sochureki</i>         | LC            | 50,424                        | 7,068                             | 14.0               |
| <i>Hemidactylus robustus</i>             | LC            | 48,160                        | 6,940                             | 14.4               |
| <i>Myriopholis macrorhyncha</i>          | LC            | 28,228                        | 4,236                             | 15.0               |
| <i>Pseudoceramodactylus khobarensis</i>  | LC            | 51,376                        | 7,932                             | 15.4               |
| <i>Stenodactylus slevini</i>             | LC            | 44,936                        | 7,044                             | 15.7               |
| <i>Trapelus flavimaculatus</i>           | LC            | 53,524                        | 8,456                             | 15.8               |
| <i>Mesalina brevirostris</i>             | LC            | 23,716                        | 3,992                             | 16.8               |
| <i>Scincus scincus conirostris</i>       | DD            | 20,712                        | 3,552                             | 17.1               |
| <u>Hemidactylus persicus</u>             | VU            | 1,032                         | 180                               | 17.4               |
| <i>Rhagerhis moilensis</i>               | LC            | 28,176                        | 5,052                             | 17.9               |
| <i>Lytorhynchus diadema diadema</i>      | LC            | 65,892                        | 12,032                            | 18.3               |
| <u>Heremites septemtaeniatus</u>         | DD            | 3,144                         | 580                               | 18.4               |
| <i>Cerastes gasperettii gasperettii</i>  | LC            | 65,284                        | 12,544                            | 19.2               |
| <i>Psammophis schokari</i>               | LC            | 78,364                        | 16,032                            | 20.5               |
| <i>Eryx jayakari</i>                     | LC            | 74,416                        | 15,272                            | 20.5               |
| <i>Phrynocephalus arabicus</i>           | LC            | 71,012                        | 14,684                            | 20.7               |
| <i>Bunopus tuberculatus</i>              | LC            | 77,776                        | 16,160                            | 20.8               |
| <i>Stenodactylus doriae</i>              | LC            | 74,484                        | 15,828                            | 21.3               |
| <i>Varanus griseus griseus</i>           | LC            | 73,140                        | 15,604                            | 21.3               |
| <i>Acanthodactylus gongrorhynchatus</i>  | LC            | 72,716                        | 15,592                            | 21.4               |
| <i>Acanthodactylus schmidti</i>          | LC            | 73,900                        | 15,856                            | 21.5               |
| <i>Scincus mitranus</i>                  | LC            | 72,040                        | 15,672                            | 21.8               |
| <i>Uromastix aegyptia microlepis</i>     | VU            | 55,360                        | 12,044                            | 21.8               |
| <i>Cyrtopodion scabrum</i>               | LC            | 61,148                        | 13,516                            | 22.1               |
| <i>Stenodactylus arabicus</i>            | LC            | 64,784                        | 15,088                            | 23.3               |
| <i>Phrynocephalus maculatus</i>          | LC            | 57,864                        | 13,728                            | 23.7               |
| <i>Stenodactylus leptocymbotes</i>       | LC            | 19,308                        | 4,676                             | 24.2               |
| <i>Acanthodactylus ophedurus</i>         | DD            | 29,596                        | 8,516                             | 28.8               |
| <u>Ablepharus pannonicus</u>             | LC            | 64                            | 20                                | 31.3               |
| <u>Acanthodactylus blanfordii</u>        | VU            | 8                             | 8                                 | 100.0              |
