# Supplementary material for: An integrative assessment of the diversity, phylogeny, distribution, and conservation of the terrestrial reptiles (Sauropsida, Squamata) of the United Arab Emirates
Source: PubMed Central journal article supplement (PMC6497385; doi:10.1371/journal.pone.0216273), 2019-05-02
Supplement: pone.0216273.s021.pdf [file pone.0216273.s021.pdf]

**S10 Table. Evolutionary distinctiveness (ED) of each of the 60 species of UAE terrestrial reptiles.** The numbers show the evolutionary uniqueness of each species with respect to other UAE reptiles in millions of years. Asterisks highlight the three introduced species.

| Species                                      | Evolutionary distinctiveness (ED) |
|----------------------------------------------|-----------------------------------|
| <i>Ablepharus pannonicus</i>                 | 68.5                              |
| <i>Acanthodactylus blanfordii</i>            | 20.1                              |
| <i>Acanthodactylus boskianus asper</i>       | 15.9                              |
| <i>Acanthodactylus gongrorhynchatus</i>      | 15.8                              |
| <i>Acanthodactylus haasi</i>                 | 15.8                              |
| <i>Acanthodactylus opheodurus</i>            | 15.9                              |
| <i>Acanthodactylus schmidti</i>              | 20.1                              |
| <i>Asaccus caudivolvulus</i>                 | 26.3                              |
| <i>Asaccus gallagheri</i>                    | 30.5                              |
| <i>Asaccus gardneri</i>                      | 26.3                              |
| <i>Asaccus margaritae</i>                    | 30.5                              |
| <i>Bunopus tuberculatus</i>                  | 46.1                              |
| <i>Cerastes gasperettii gasperettii</i>      | 47.4                              |
| <i>Chalcides ocellatus ocellatus*</i>        | 68.5                              |
| <i>Cyrtopodion scabrum</i>                   | 35.8                              |
| <i>Diplometopon zarudnyi</i>                 | 141.0                             |
| <i>Echis carinatus sochureki</i>             | 22.6                              |
| <i>Echis omanensis</i>                       | 22.6                              |
| <i>Eryx jayakari</i>                         | 100.4                             |
| <i>Hemidactylus flaviviridis*</i>            | 54.7                              |
| <i>Hemidactylus persicus</i>                 | 34.1                              |
| <i>Hemidactylus robustus</i>                 | 34.1                              |
| <i>Heremites septemtaeniatus</i>             | 55.9                              |
| <i>Indotyphlops braminus*</i>                | 120.4                             |
| <i>Lytorhynchus diadema diadema</i>          | 35.4                              |
| <i>Mesalina adramitana</i>                   | 32.6                              |
| <i>Mesalina brevirostris</i>                 | 32.6                              |
| <i>Myriopholis macrorhyncha</i>              | 120.4                             |
| <i>Omanosaura cyanura</i>                    | 50.4                              |
| <i>Omanosaura jayakari</i>                   | 50.4                              |
| <i>Phrynocephalus arabicus</i>               | 33.1                              |
| <i>Phrynocephalus maculatus</i>              | 33.1                              |
| <i>Platycephalus rhodorachis rhodorachis</i> | 13.6                              |
| <i>Platycephalus ventromaculatus</i>         | 13.6                              |
| <i>Pristurus carteri</i>                     | 32.2                              |
| <i>Pristurus celerrimus</i>                  | 66.4                              |
| <i>Pristurus minimus</i>                     | 32.2                              |
| <i>Pristurus rupestris</i> -sp. 3            | 45.4                              |
| <i>Psammophis schokari</i>                   | 33.4                              |
| <i>Pseudoceramodactylus khobarensis</i>      | 57.5                              |
| <i>Pseudocerastes persicus</i>               | 49.2                              |
| <i>Pseudotrapelus jensvindumi</i>            | 34.1                              |
| <i>Ptyodactylus orlovi</i>                   | 42.7                              |
| <i>Ptyodactylus ruusaljibalicus</i>          | 42.7                              |
| <i>Rhagerhis moilensis</i>                   | 33.4                              |
| <i>Scincus mitranus</i>                      | 65.9                              |
| <i>Scincus scincus conirostris</i>           | 65.9                              |
| <i>Spalerosophis diadema cliffordii</i>      | 24.7                              |
| <i>Stenodactylus arabicus</i>                | 35.5                              |
| <i>Stenodactylus doriae</i>                  | 14.1                              |
| <i>Stenodactylus leptocosymbotes</i>         | 14.1                              |
| <i>Stenodactylus slevini</i>                 | 22.7                              |
| <i>Telescopus dhara dhara</i>                | 18.4                              |
| <i>Teratoscincus keyserlingii</i>            | 100.0                             |
| <i>Trachydactylus hajarensis</i>             | 35.8                              |
| <i>Trachylepis tessellata</i>                | 55.9                              |
| <i>Trapelus flavimaculatus</i>               | 84.2                              |
| <i>Uromastyx aegyptia leptieni</i>           | 62.8                              |
| <i>Uromastyx aegyptia microlepis</i>         | 62.8                              |
| <i>Varanus griseus griseus</i>               | 159.2                             |
